# Supplementary material for: The GC Content as a Main Factor Shaping the Amino Acid Usage During Bacterial Evolution Process
Source: Front Microbiol. 2018 Dec 7;9:2948. doi: 10.3389/fmicb.2018.02948 (PMC6292993; doi:10.3389/fmicb.2018.02948)
Supplement: TABLE S1 — The organism name and corresponding number of homologous COGs to LUCA. [file Data_Sheet_1.xlsx]

## Sheet: Sheet1
Table S1 The organism name and corresponding number of homologous COGs to LUCA
Organism	Number of homologous COGs to LUCA
Methanosarcina acetivorans C2A uid57879	211
Streptosporangium roseum DSM 43021 uid42521	201
Methanosarcina barkeri Fusaro uid57715	198
Streptomyces violaceusniger Tu 4113 uid52609	195
Burkholderia phymatum STM815 uid58699	193
Methanosarcina mazei Go1 uid57893	193
Streptomyces cattleya NRRL 8057 DSM 46488 uid77117	193
Saccharopolyspora erythraea NRRL 2338 uid62947	192
Sorangium cellulosum So ce 56 uid61629	192
Streptomyces griseus NBRC 13350 uid58983	192
Streptomyces scabiei 87 22 uid46531	192
Micromonospora aurantiaca ATCC 27029 uid42501	191
Amycolatopsis mediterranei U32 uid50565	190
Micromonospora L5 uid45895	190
Streptomyces flavogriseus ATCC 33331 uid40839	190
Verrucosispora maris AB 18 032 uid66297	190
Streptomyces avermitilis MA 4680 uid57739	189
Catenulispora acidiphila DSM 44928 uid59077	188
Paenibacillus mucilaginosus KNP414 uid68311	188
Roseiflexus castenholzii DSM 13941 uid58287	188
Burkholderia CCGE1002 uid42523	187
Candidatus Solibacter usitatus Ellin6076 uid58139	187
Rhodococcus jostii RHA1 uid58325	187
Roseiflexus RS 1 uid58523	187
Burkholderia xenovorans LB400 uid57823	186
Frankia EAN1pec uid58367	185
Salinispora tropica CNB 440 uid58565	185
Haloterrigena turkmenica DSM 5511 uid43501	184
Streptomyces coelicolor A3 2 uid57801	184
Burkholderia 383 uid58073	183
Cyanothece PCC 7822 uid52547	183
Desulfobacterium autotrophicum HRM2 uid59061	183
Mycobacterium smegmatis MC2 155 uid57701	183
Nakamurella multipartita DSM 44233 uid59221	183
Pseudonocardia dioxanivorans CB1190 uid65087	183
Bradyrhizobium japonicum USDA 110 uid57599	182
Chloroflexus aurantiacus J 10 fl uid57657	182
Kitasatospora setae KM 6054 uid77027	182
Mesorhizobium ciceri biovar biserrulae WSM1271 uid62101	182
Methanospirillum hungatei JF 1 uid58181	182
Salinispora arenicola CNS 205 uid58659	182
Stackebrandtia nassauensis DSM 44728 uid46663	182
Actinosynnema mirum DSM 43827 uid58951	181
Burkholderia cenocepacia J2315 uid57953	181
Chloroflexus Y 400 fl uid59085	181
Microlunatus phosphovorus NM 1 uid68055	181
Mycobacterium KMS uid58491	181
Myxococcus xanthus DK 1622 uid58003	181
Ralstonia eutropha H16 uid62925	181
Rhodococcus erythropolis PR4 uid59019	181
Syntrophobacter fumaroxidans MPOB uid58177	181
Chloroflexus aggregans DSM 9485 uid58621	180
Desulfitobacterium hafniense Y51 uid58605	180
Herpetosiphon aurantiacus DSM 785 uid58599	180
Kribbella flavida DSM 17836 uid43465	180
Mycobacterium MCS uid58465	180
Nostoc punctiforme PCC 73102 uid57767	180
Rhodococcus opacus B4 uid13791	180
Streptomyces SirexAA E uid72627	180
Acaryochloris marina MBIC11017 uid58167	179
Burkholderia CCGE1001 uid42975	179
Burkholderia gladioli BSR3 uid66301	179
Haliangium ochraceum DSM 14365 uid41425	179
Myxococcus fulvus HW 1 uid68443	179
Nostoc PCC 7120 uid57803	179
Rhizobium leguminosarum bv viciae 3841 uid57955	179
Thermomonospora curvata DSM 43183 uid41885	179
Variovorax paradoxus S110 uid59437	179
Burkholderia cenocepacia HI2424 uid58369	178
Burkholderia cenocepacia MC0 3 uid58769	178
Burkholderia vietnamiensis G4 uid58075	178
Cyanothece PCC 7425 uid59435	178
Desulfitobacterium hafniense DCB 2 uid57749	178
Escherichia coli O26 H11 11368 uid41021	178
Escherichia coli UMN026 uid62981	178
Haloarcula marismortui ATCC 43049 uid57719	178
Methylobacterium nodulans ORS 2060 uid59023	178
Mycobacterium gilvum PYR GCK uid59421	178
Azospirillum B510 uid46085	177
Brevibacillus brevis NBRC 100599 uid59175	177
Burkholderia phytofirmans PsJN uid58729	177
Frankia alni ACN14a uid58695	177
Frankia EuI1c uid42615	177
Gordonia bronchialis DSM 43247 uid41403	177
Haliscomenobacter hydrossis DSM 1100 uid66777	177
Halopiger xanaduensis SH 6 uid68105	177
Mycobacterium vanbaalenii PYR 1 uid58463	177
Paenibacillus JDR 2 uid59021	177
Ralstonia eutropha JMP134 uid58047	177
Alkaliphilus metalliredigens QYMF uid58171	176
Anabaena variabilis ATCC 29413 uid58043	176
Burkholderia ambifaria AMMD uid58303	176
Burkholderia cenocepacia AU 1054 uid58371	176
Burkholderia pseudomallei K96243 uid57733	176
Cupriavidus necator N 1 uid68689	176
Geodermatophilus obscurus DSM 43160 uid43725	176
Intrasporangium calvum DSM 43043 uid61729	176
Mesorhizobium loti MAFF303099 uid57601	176
Nocardioides JS614 uid58149	176
Archaeoglobus fulgidus DSM 4304 uid57717	175
Burkholderia CCGE1003 uid46253	175
Burkholderia multivorans ATCC 17616 uid58697	175
Burkholderia pseudomallei 668 uid58389	175
Desulfatibacillum alkenivorans AK 01 uid58913	175
Escherichia coli E24377A uid58395	175
Halogeometricum borinquense DSM 11551 uid54919	175
Klebsiella pneumoniae MGH 78578 uid57619	175
Klebsiella pneumoniae NTUH K2044 uid59073	175
Mesorhizobium opportunistum WSM2075 uid40861	175
Methanocella arvoryzae MRE50 uid61623	175
Methanosaeta concilii GP6 uid66207	175
Mycobacterium JLS uid58489	175
Nocardiopsis dassonvillei DSM 43111 uid49483	175
Pantoea At 9b uid55845	175
Pseudomonas fluorescens Pf0 1 uid57591	175
Burkholderia multivorans ATCC 17616 uid58909	174
Burkholderia pseudomallei 1710b uid58391	174
Chitinophaga pinensis DSM 2588 uid59113	174
Cupriavidus taiwanensis LMG 19424 uid61615	174
Desulfovibrio magneticus RS 1 uid59309	174
Enterobacter aerogenes KCTC 2190 uid68103	174
Escherichia coli 55989 uid59383	174
Escherichia coli IAI1 uid59377	174
Escherichia coli O103 H2 12009 uid41013	174
Escherichia coli O111 H 11128 uid41023	174
Escherichia coli SE11 uid59425	174
Geobacter M18 uid55771	174
Methanocella paludicola SANAE uid42887	174
Mycobacterium gilvum Spyr1 uid61403	174
Pseudomonas putida F1 uid58355	174
Thermobispora bispora DSM 43833 uid48999	174
Azotobacter vinelandii DJ uid57597	173
Bradyrhizobium ORS 278 uid58941	173
Burkholderia ambifaria MC40 6 uid58701	173
Burkholderia pseudomallei 1106a uid58515	173
Burkholderia thailandensis E264 uid58081	173
Conexibacter woesei DSM 14684 uid43467	173
Escherichia coli CFT073 uid57915	173
Escherichia coli HS uid58393	173
Klebsiella pneumoniae 342 uid59145	173
Leptothrix cholodnii SP 6 uid58971	173
Mycobacterium marinum M uid59423	173
Pseudomonas fluorescens Pf 5 uid57937	173
Pseudomonas putida KT2440 uid57843	173
Rhizobium leguminosarum bv trifolii WSM2304 uid58997	173
Agrobacterium radiobacter K84 uid58269	172
Archaeoglobus veneficus SNP6 uid65269	172
Bacillus halodurans C 125 uid57791	172
Candidatus Koribacter versatilis Ellin345 uid58479	172
Escherichia coli S88 uid62979	172
Escherichia coli SMS 3 5 uid58919	172
Escherichia coli UTI89 uid58541	172
Ferroglobus placidus DSM 10642 uid40863	172
Geobacter M21 uid59037	172
Klebsiella variicola At 22 uid42113	172
Methylobacterium radiotolerans JCM 2831 uid58845	172
Pseudomonas aeruginosa LESB58 uid59275	172
Pseudomonas aeruginosa UCBPP PA14 uid57977	172
Pseudomonas brassicacearum NFM421 uid66303	172
Pseudomonas putida W619 uid58651	172
Rhizobium leguminosarum bv trifolii WSM1325 uid58991	172
Rhodococcus equi 103S uid60171	172
Rhodopseudomonas palustris CGA009 uid62901	172
Salmonella enterica serovar Schwarzengrund CVM19633 uid58915	172
Cyanothece PCC 7424 uid59025	171
Desulfomicrobium baculatum DSM 4028 uid59217	171
Desulfotomaculum acetoxidans DSM 771 uid59109	171
Escherichia coli 536 uid58531	171
Escherichia coli ATCC 8739 uid58783	171
Escherichia coli BW2952 uid59391	171
Escherichia coli B REL606 uid58803	171
Escherichia coli O127 H6 E2348 69 uid59343	171
Escherichia coli BL21 Gold DE3 pLysS AG uid59245	171
Frankia CcI3 uid58397	171
Hahella chejuensis KCTC 2396 uid58483	171
Methylobacterium extorquens AM1 uid57605	171
Photobacterium profundum SS9 uid62923	171
Pseudomonas entomophila L48 uid58639	171
Pseudomonas fluorescens SBW25 uid158693	171
Rhodopseudomonas palustris DX 1 uid43327	171
Salmonella enterica serovar Enteritidis P125109 uid59247	171
Salmonella enterica serovar Typhimurium LT2 uid57799	171
Tsukamurella paurometabola DSM 20162 uid48829	171
Variovorax paradoxus EPS uid62107	171
Arthrobacter aurescens TC1 uid58109	170
Beutenbergia cavernae DSM 12333 uid59047	170
Burkholderia mallei NCTC 10247 uid58385	170
Citrobacter koseri ATCC BAA 895 uid58143	170
Desulfotomaculum kuznetsovii DSM 6115 uid67357	170
Escherichia coli APEC O1 uid58623	170
Escherichia coli O157 H7 EDL933 uid57831	170
Escherichia coli O157 H7 TW14359 uid59235	170
Methanobacterium AL 21 uid63623	170
Paenibacillus Y412MC10 uid41127	170
Paracoccus denitrificans PD1222 uid58187	170
Pseudomonas aeruginosa PA7 uid58627	170
Pseudomonas aeruginosa PAO1 uid57945	170
Pseudomonas fulva 12 X uid67351	170
Pseudomonas mendocina ymp uid58723	170
Rhodopseudomonas palustris TIE 1 uid58995	170
Salmonella enterica serovar Agona SL483 uid59431	170
Salmonella enterica serovar Dublin CT 02021853 uid58917	170
Salmonella enterica serovar Gallinarum 287 91 uid59249	170
Serratia AS12 uid67315	170
Serratia plymuthica AS9 uid67313	170
Anaeromyxobacter Fw109 5 uid58755	169
Arthrobacter phenanthrenivorans Sphe3 uid63629	169
Bacillus megaterium QM B1551 uid15862	169
Bradyrhizobium BTAi1 uid58505	169
Burkholderia mallei NCTC 10229 uid58383	169
Cupriavidus metallidurans CH34 uid57815	169
Deinococcus maricopensis DSM 21211 uid62225	169
Desulfarculus baarsii DSM 2075 uid51371	169
Enterobacter cloacae SCF1 uid59969	169
Escherichia coli IAI39 uid59381	169
Escherichia coli O157 H7 uid57781	169
Escherichia coli O55 H7 CB9615 uid46655	169
Hyphomicrobium MC1 uid68453	169
Methanobacterium SWAN 1 uid67359	169
Methanoculleus marisnigri JR1 uid58561	169
Pseudomonas putida GB 1 uid58735	169
Pseudomonas stutzeri A1501 uid58641	169
Rhizobium etli CIAT 652 uid59115	169
Rhodoferax ferrireducens T118 uid58353	169
Salmonella enterica serovar Heidelberg SL476 uid58973	169
Salmonella enterica serovar Newport SL254 uid58831	169
Salmonella enterica serovar Paratyphi B SPB7 uid59097	169
Shewanella baltica OS185 uid58743	169
Sinorhizobium meliloti 1021 uid57603	169
Spirochaeta smaragdinae DSM 11293 uid51369	169
Vibrio parahaemolyticus RIMD 2210633 uid57969	169
Arthrobacter FB24 uid58141	168
Bacillus cereus 03BB102 uid59299	168
Bacillus cereus AH820 uid58751	168
Bacillus cereus B4264 uid58757	168
Burkholderia glumae BGR1 uid59397	168
Burkholderia mallei ATCC 23344 uid57725	168
Candidatus Accumulibacter phosphatis clade IIA UW 1 uid59207	168
Cellulomonas flavigena DSM 20109 uid48821	168
Citrobacter rodentium ICC168 uid43089	168
Delftia Cs1 4 uid67319	168
Escherichia coli ED1a uid59379	168
Escherichia coli K 12 substr DH10B uid58979	168
Escherichia coli O157 H7 EC4115 uid59091	168
Escherichia fergusonii ATCC 35469 uid59375	168
Geobacter bemidjiensis Bem uid58749	168
Haloarcula hispanica ATCC 33960 uid72475	168
Methanococcus maripaludis S2 uid58035	168
Methanosalsum zhilinae DSM 4017 uid68249	168
Methylobacterium chloromethanicum CM4 uid58933	168
Nocardia farcinica IFM 10152 uid58203	168
Pectobacterium atrosepticum SCRI1043 uid57957	168
Pseudomonas mendocina NK 01 uid66299	168
Pseudomonas syringae B728a uid57931	168
Rhizobium etli CFN 42 uid58377	168
Rhodopseudomonas palustris BisB18 uid58443	168
Runella slithyformis DSM 19594 uid68317	168
Salmonella enterica serovar Choleraesuis SC B67 uid58017	168
Shewanella baltica OS195 uid58261	168
Shewanella sediminis HAW EB3 uid58835	168
Sinorhizobium medicae WSM419 uid58549	168
Sinorhizobium meliloti AK83 uid52607	168
Xanthobacter autotrophicus Py2 uid58453	168
Agrobacterium vitis S4 uid58249	167
Anaerolinea thermophila UNI 1 uid62245	167
Anaeromyxobacter K uid58953	167
Arthrobacter chlorophenolicus A6 uid58969	167
Bacillus anthracis Sterne uid58091	167
Bacillus anthracis Ames Ancestor uid58083	167
Bacillus cereus ATCC 10987 uid57673	167
Bacillus megaterium DSM319 uid48371	167
Bacillus thuringiensis Al Hakam uid58795	167
Bacillus thuringiensis serovar konkukian 97 27 uid58089	167
Bacillus weihenstephanensis KBAB4 uid58315	167
Burkholderia mallei SAVP1 uid58387	167
Clostridium ljungdahlii DSM 13528 uid50583	167
Desulfotomaculum ruminis DSM 2154 uid67507	167
Enterobacter cloacae ATCC 13047 uid48363	167
Frankia symbiont of Datisca glomerata uid46257	167
Geobacillus thermodenitrificans NG80 2 uid58829	167
Geobacter uraniireducens Rf4 uid58475	167
Methanohalobium evestigatum Z 7303 uid49857	167
Methanoplanus petrolearius DSM 11571 uid52695	167
Polaromonas JS666 uid58207	167
Pseudomonas syringae tomato DC3000 uid57967	167
Rhodopseudomonas palustris HaA2 uid58439	167
Shewanella woodyi ATCC 51908 uid58721	167
Spirosoma linguale DSM 74 uid43413	167
Sulfolobus islandicus Y N 15 51 uid58825	167
Vibrio Ex25 uid41601	167
Vibrio harveyi ATCC BAA 1116 uid58957	167
Anaeromyxobacter dehalogenans 2CP 1 uid58989	166
Azorhizobium caulinodans ORS 571 uid58905	166
Bacillus thuringiensis BMB171 uid49135	166
Comamonas testosteroni CNB 2 uid62961	166
Cyanothece PCC 8802 uid59143	166
Deinococcus deserti VCD115 uid58615	166
Delftia acidovorans SPH 1 uid58703	166
Enterobacter asburiae LF7a uid72793	166
Geobacillus thermoglucosidasius C56 YS93 uid48129	166
Geobacillus Y4 1MC1 uid55779	166
Haloferax volcanii DS2 uid46845	166
Halorhabdus utahensis DSM 12940 uid59189	166
Methanococcus maripaludis C7 uid58847	166
Methylobacterium 4 46 uid58843	166
Methylobacterium extorquens DM4 uid61617	166
Mycobacterium bovis AF2122 97 uid57695	166
Pseudomonas putida S16 uid68747	166
Pseudomonas stutzeri ATCC 17588 LMG 11199 uid68749	166
Rhizobium NGR234 uid59081	166
Rhodopirellula baltica SH 1 uid61589	166
Salmonella enterica serovar Typhi CT18 uid57793	166
Salmonella enterica serovar Typhi Ty2 uid57973	166
Shewanella baltica OS155 uid58259	166
Shewanella putrefaciens CN 32 uid58267	166
Vibrio vulnificus YJ016 uid58007	166
Yersinia enterocolitica palearctica 105 5R r uid63663	166
Acidobacterium MP5ACTX9 uid50551	165
Aeromonas veronii B565 uid66323	165
Anaeromyxobacter dehalogenans 2CP C uid58135	165
Azoarcus BH72 uid61603	165
Bacillus anthracis CDC 684 uid59303	165
Bacillus cellulosilyticus DSM 2522 uid43329	165
Bacillus cereus biovar anthracis CI uid50615	165
Bacillus cereus Q1 uid58529	165
Bacillus pseudofirmus OF4 uid45847	165
Clostridium lentocellum DSM 5427 uid49117	165
Desulfovibrio salexigens DSM 2638 uid59223	165
Dickeya dadantii Ech586 uid42519	165
Methanococcoides burtonii DSM 6242 uid58023	165
Methylibium petroleiphilum PM1 uid58085	165
Mycobacterium bovis BCG Pasteur 1173P2 uid58781	165
Paenibacillus polymyxa E681 uid53477	165
Paenibacillus polymyxa SC2 uid59583	165
Pseudomonas syringae phaseolicola 1448A uid58099	165
Ralstonia solanacearum GMI1000 uid57593	165
Rhodobacter sphaeroides ATCC 17025 uid58451	165
Rhodopseudomonas palustris BisB5 uid58441	165
Saccharomonospora viridis DSM 43017 uid59055	165
Salmonella bongori NCTC 12419 uid70155	165
Salmonella enterica arizonae serovar 62 z4 z23 uid58191	165
Salmonella enterica serovar Paratyphi A AKU 12601 uid59269	165
Salmonella enterica serovar Paratyphi C RKS4594 uid59063	165
Serratia proteamaculans 568 uid58725	165
Shewanella baltica OS223 uid58775	165
Shigella boydii CDC 3083 94 uid58415	165
Shigella sonnei Ss046 uid58217	165
Truepera radiovictrix DSM 17093 uid49533	165
Vibrio vulnificus CMCP6 uid62909	165
Vibrio vulnificus MO6 24 O uid62243	165
Yersinia enterocolitica 8081 uid57741	165
Amycolicicoccus subflavus DQS3 9A1 uid67253	164
Bacillus clausii KSM K16 uid58237	164
Bacillus licheniformis ATCC 14580 uid58097	164
Desulfovibrio aespoeensis Aspo 2 uid42613	164
Erwinia billingiae Eb661 uid50547	164
Geobacillus Y412MC52 uid55381	164
Gloeobacter violaceus PCC 7421 uid58011	164
Lysinibacillus sphaericus C3 41 uid58945	164
Methanococcus maripaludis C6 uid58947	164
Methanohalophilus mahii DSM 5219 uid47313	164
Methanosphaerula palustris E1 9c uid59193	164
Methanothermobacter thermautotrophicus Delta H uid57877	164
Mycobacterium avium paratuberculosis K 10 uid57699	164
Mycobacterium bovis BCG Tokyo 172 uid59281	164
Mycobacterium tuberculosis H37Ra uid58853	164
Natrialba magadii ATCC 43099 uid46245	164
Polaromonas naphthalenivorans CJ2 uid58273	164
Shewanella loihica PV 4 uid58349	164
Shewanella MR 4 uid58345	164
Thermobifida fusca YX uid57703	164
Yersinia pestis Antiqua uid58607	164
Aeromonas hydrophila ATCC 7966 uid58617	163
Bacillus anthracis A0248 uid59385	163
Bacillus cereus AH187 uid58753	163
Bacillus cereus G9842 uid58759	163
Clostridium beijerinckii NCIMB 8052 uid58137	163
Cronobacter sakazakii ATCC BAA 894 uid58145	163
Cyanothece PCC 8801 uid59027	163
Deinococcus radiodurans R1 uid57665	163
Desulfobulbus propionicus DSM 2032 uid62265	163
Dickeya zeae Ech1591 uid59297	163
Methanococcus maripaludis X1 uid70729	163
Microbacterium testaceum StLB037 uid62789	163
Mycobacterium JDM601 uid67369	163
Mycobacterium tuberculosis CDC1551 uid57775	163
Rahnella Y9602 uid62715	163
Rhodobacter sphaeroides ATCC 17029 uid58449	163
Rhodobacter sphaeroides KD131 uid59277	163
Rhodopseudomonas palustris BisA53 uid58445	163
Salmonella enterica serovar Paratyphi A ATCC 9150 uid58201	163
Shewanella ANA 3 uid58347	163
Shewanella halifaxensis HAW EB4 uid59007	163
Shewanella MR 7 uid58343	163
Shewanella W3 18 1 uid58341	163
Starkeya novella DSM 506 uid48815	163
Sulfolobus islandicus M 16 27 uid58851	163
Yersinia pseudotuberculosis IP 31758 uid58487	163
Achromobacter xylosoxidans A8 uid59899	162
Acidovorax avenae ATCC 19860 uid42497	162
Aeromonas salmonicida A449 uid58631	162
Agrobacterium H13 3 uid63403	162
Bacillus anthracis Ames uid57909	162
Bacillus selenitireducens MLS10 uid49513	162
Clostridium saccharolyticum WM1 uid51419	162
Geobacillus Y412MC61 uid41171	162
Methanoregula boonei 6A8 uid58815	162
Methylobacterium extorquens PA1 uid58821	162
Methylobacterium populi BJ001 uid58937	162
Mycobacterium tuberculosis F11 uid58417	162
Mycobacterium tuberculosis KZN 1435 uid59069	162
Ralstonia solanacearum PSI07 uid50539	162
Rhodobacter capsulatus SB 1003 uid47509	162
Shewanella frigidimarina NCIMB 400 uid58265	162
Shewanella pealeana ATCC 700345 uid58705	162
Shigella boydii Sb227 uid58215	162
Sphingobacterium 21 uid64755	162
Sulfolobus islandicus L S 2 15 uid58871	162
Sulfolobus islandicus M 14 25 uid58849	162
Sulfolobus islandicus Y G 57 14 uid58923	162
Synechocystis PCC 6803 uid57659	162
Thermoanaerobacterium thermosaccharolyticum DSM 571 uid51639	162
Thermobaculum terrenum ATCC BAA 798 uid42011	162
Thermomicrobium roseum DSM 5159 uid59341	162
Yersinia pseudotuberculosis IP 32953 uid58157	162
Acidovorax citrulli AAC00 1 uid58429	161
Bacillus subtilis 168 uid57675	161
Bacillus subtilis spizizenii W23 uid51879	161
Carboxydothermus hydrogenoformans Z 2901 uid57821	161
Clostridium botulinum Ba4 657 uid59173	161
Cyanothece ATCC 51142 uid59013	161
Desulfovibrio vulgaris Miyazaki F uid59089	161
Dickeya dadantii Ech703 uid59363	161
Dyadobacter fermentans DSM 18053 uid59049	161
Enterobacter 638 uid58727	161
Flavobacterium johnsoniae UW101 uid58493	161
Gemmatimonas aurantiaca T 27 uid58813	161
Geobacillus WCH70 uid59045	161
Kineococcus radiotolerans SRS30216 uid58067	161
Kyrpidia tusciae DSM 2912 uid48361	161
Methanotorris igneus Kol 5 uid67321	161
Methylomicrobium alcaliphilum uid77119	161
Mycobacterium abscessus uid61613	161
Mycobacterium africanum GM041182 uid68839	161
Pectobacterium carotovorum PC1 uid59295	161
Ramlibacter tataouinensis TTB310 uid68279	161
Rhodospirillum rubrum ATCC 11170 uid57655	161
Shigella flexneri 5 8401 uid58583	161
Sulfolobus islandicus L D 8 5 uid43679	161
Sulfolobus islandicus M 16 4 uid58841	161
Thauera MZ1T uid58987	161
Trichodesmium erythraeum IMS101 uid57925	161
Vibrio splendidus LGP32 uid59353	161
Xanthomonas axonopodis citri 306 uid57889	161
Xanthomonas campestris 8004 uid57595	161
Xanthomonas campestris ATCC 33913 uid57887	161
Yersinia pestis Nepal516 uid58609	161
Yersinia pestis Pestoides F uid58619	161
Yersinia pseudotuberculosis PB1 uid59153	161
Caldicellulosiruptor kristjanssonii 177R1B uid60393	160
Clavibacter michiganensis NCPPB 382 uid61625	160
Clostridium acetobutylicum ATCC 824 uid57677	160
Clostridium acetobutylicum DSM 1731 uid68293	160
Clostridium botulinum F Langeland uid58929	160
Desulfovibrio alaskensis G20 uid57941	160
Dickeya dadantii 3937 uid52537	160
Dinoroseobacter shibae DFL 12 uid58707	160
Geobacillus C56 T3 uid49467	160
Geobacter lovleyi SZ uid58713	160
Isosphaera pallida ATCC 43644 uid62207	160
Jannaschia CCS1 uid58147	160
Marinobacter aquaeolei VT8 uid59419	160
Meiothermus silvanus DSM 9946 uid49485	160
Methanocaldococcus FS406 22 uid42499	160
Mycobacterium canettii CIPT 140010059 uid70731	160
Mycobacterium tuberculosis H37Rv uid57777	160
Mycobacterium ulcerans Agy99 uid62939	160
Pantoea vagans C9 1 uid49871	160
Rhodothermus marinus DSM 4252 uid41729	160
Rhodothermus marinus SG0 5JP17 172 uid72767	160
Shewanella amazonensis SB2B uid58257	160
Shigella flexneri 2a 2457T uid57991	160
Sulfolobus solfataricus P2 uid57721	160
Symbiobacterium thermophilum IAM 14863 uid58165	160
Synechococcus PCC 7002 uid59137	160
Xanthomonas campestris uid61643	160
Yersinia pestis KIM 10 uid57875	160
Yersinia pestis Z176003 uid47317	160
Yersinia pseudotuberculosis YPIII uid59151	160
Cellvibrio gilvus ATCC 13127 uid68143	160
Agrobacterium fabrum C58 uid57865	159
Arthrobacter arilaitensis Re117 uid53509	159
Bacillus atrophaeus 1942 uid59887	159
Bacillus subtilis spizizenii TU B 10 uid73967	159
Caldicellulosiruptor kronotskyensis 2002 uid60491	159
Chromobacterium violaceum ATCC 12472 uid58001	159
Clostridium botulinum A2 Kyoto uid59229	159
Clostridium botulinum A3 Loch Maree uid59149	159
Clostridium botulinum B1 Okra uid59147	159
Collimonas fungivorans Ter331 uid70793	159
Geobacillus kaustophilus HTA426 uid58227	159
Halalkalicoccus jeotgali B3 uid50305	159
Marinomonas MWYL1 uid58715	159
Methanococcus maripaludis C5 uid58741	159
Phenylobacterium zucineum HLK1 uid58959	159
Pyrococcus furiosus DSM 3638 uid57873	159
Ralstonia pickettii 12D uid58859	159
Ralstonia pickettii 12J uid58737	159
Roseobacter denitrificans OCh 114 uid58597	159
Roseobacter litoralis Och 149 uid54719	159
Rubrobacter xylanophilus DSM 9941 uid58057	159
Shewanella piezotolerans WP3 uid58745	159
Shigella dysenteriae Sd197 uid58213	159
Sphaerobacter thermophilus DSM 20745 uid41997	159
Thermincola potens JR uid48823	159
Yersinia pestis biovar Microtus 91001 uid58037	159
Yersinia pestis CO92 uid57621	159
Alteromonas SN2 uid67349	158
Bacillus amyloliquefaciens DSM 7 uid53535	158
Bacillus amyloliquefaciens FZB42 uid58271	158
Bacillus subtilis BSn5 uid62463	158
Bordetella petrii uid61631	158
Cellulomonas fimi ATCC 484 uid66779	158
Clostridium botulinum A ATCC 3502 uid61579	158
Clostridium difficile R20291 uid40921	158
Colwellia psychrerythraea 34H uid57855	158
Cyclobacterium marinum DSM 745 uid71485	158
Deinococcus geothermalis DSM 11300 uid58275	158
Edwardsiella tarda EIB202 uid41819	158
Geobacter FRC 32 uid58543	158
Methylocella silvestris BL2 uid59433	158
Pseudogulbenkiania NH8B uid73423	158
Pyrobaculum aerophilum IM2 uid57727	158
Shewanella violacea DSS12 uid47085	158
Sulfobacillus acidophilus TPY uid68841	158
Sulfolobus tokodaii 7 uid57807	158
Terriglobus saanensis SP1PR4 uid53251	158
Thermoanaerobacter tengcongensis MB4 uid57813	158
Vulcanisaeta distributa DSM 14429 uid52827	158
Xanthomonas campestris vesicatoria 85 10 uid58321	158
Alicyclobacillus acidocaldarius DSM 446 uid59199	157
Bacillus pumilus SAFR 032 uid59017	157
Clostridium botulinum A ATCC 19397 uid58927	157
Clostridium difficile CD196 uid41017	157
Desulfotomaculum carboxydivorans CO 1 SRB uid67317	157
Halobacterium salinarum R1 uid61571	157
halophilic archaeon DL31 uid72619	157
Haloquadratum walsbyi DSM 16790 uid58673	157
Planctomyces brasiliensis DSM 5305 uid60583	157
Pseudoalteromonas atlantica T6c uid58283	157
Renibacterium salmoninarum ATCC 33209 uid58899	157
Sanguibacter keddieii DSM 10542 uid40845	157
Stenotrophomonas maltophilia K279a uid61647	157
Syntrophobotulus glycolicus DSM 8271 uid63343	157
Thermococcus barophilus MP uid54733	157
Thermodesulfatator indicus DSM 15286 uid68285	157
Vibrio cholerae MJ 1236 uid59387	157
Vibrio cholerae O1 2010EL 1786 uid78933	157
Xanthomonas axonopodis citrumelo F1 uid73179	157
Zobellia galactanivorans uid70621	157
Acidobacterium capsulatum ATCC 51196 uid59127	156
Alicycliphilus denitrificans K601 uid66307	156
Bordetella bronchiseptica RB50 uid57613	156
Caldicellulosiruptor saccharolyticus DSM 8903 uid58289	156
Clostridium cellulovorans 743B uid51503	156
Desulfotomaculum reducens MI 1 uid58277	156
Desulfovibrio vulgaris Hildenborough uid57645	156
Glaciecola 4H 3 7 YE 5 uid66595	156
Halomicrobium mukohataei DSM 12286 uid59107	156
Meiothermus ruber DSM 1279 uid46661	156
Methanobrevibacter ruminantium M1 uid45857	156
Methanococcus vannielii SB uid58767	156
Methylomonas methanica MC09 uid67363	156
Moorella thermoacetica ATCC 39073 uid58051	156
Mycobacterium avium 104 uid57693	156
Natranaerobius thermophilus JW NM WN LF uid59001	156
Opitutus terrae PB90 1 uid58965	156
Pelotomaculum thermopropionicum SI uid58877	156
Polymorphum gilvum SL003B 26A1 uid65447	156
Sphingobium SYK 6 uid73353	156
Acidovorax JS42 uid58427	155
Alicycliphilus denitrificans BC uid49953	155
Bacillus cereus ATCC 14579 uid57975	155
Caulobacter K31 uid58551	155
Chromohalobacter salexigens DSM 3043 uid62921	155
Clostridium botulinum A Hall uid58931	155
Clostridium difficile 630 uid57679	155
Desulfobacca acetoxidans DSM 11109 uid65785	155
Desulfovibrio vulgaris DP4 uid58679	155
Heliobacterium modesticaldum Ice1 uid58279	155
Herbaspirillum seropedicae SmR1 uid50427	155
Marinomonas mediterranea MMB 1 uid64753	155
Methanocaldococcus jannaschii DSM 2661 uid57713	155
Methanocorpusculum labreanum Z uid58785	155
Microcystis aeruginosa NIES 843 uid59101	155
Pectobacterium wasabiae WPP163 uid41297	155
Pelobacter propionicus DSM 2379 uid58255	155
Psychromonas ingrahamii 37 uid58521	155
Stenotrophomonas maltophilia JV3 uid72473	155
Thermoproteus uzoniensis 768 20 uid65089	155
Vulcanisaeta moutnovskia 768 28 uid63631	155
Yersinia pestis Angola uid58485	155
Bacillus coagulans 36D1 uid54335	154
Bacillus cytotoxicus NVH 391 98 uid58317	154
Caldicellulosiruptor bescii DSM 6725 uid59201	154
Caldicellulosiruptor lactoaceticus 6A uid60575	154
Caldicellulosiruptor obsidiansis OB47 uid51501	154
Chelativorans BNC1 uid58069	154
Chloroherpeton thalassium ATCC 35110 uid59187	154
Clostridium cellulolyticum H10 uid58709	154
Dechloromonas aromatica RCB uid58025	154
Desulfotalea psychrophila LSv54 uid58153	154
Halobacterium NRC 1 uid57769	154
Halomonas elongata DSM 2581 uid52781	154
Halorubrum lacusprofundi ATCC 49239 uid58807	154
Janthinobacterium Marseille uid58603	154
Marinomonas posidonica IVIA Po 181 uid67323	154
Methanothermobacter marburgensis Marburg uid51637	154
Photorhabdus asymbiotica ATCC 43949 uid59243	154
Pirellula staleyi DSM 6068 uid43209	154
Pyrobaculum calidifontis JCM 11548 uid58787	154
Rhodospirillum centenum SW uid58805	154
Vibrio anguillarum 775 uid68057	154
Vibrio cholerae O395 uid58425	154
Xylanimonas cellulosilytica DSM 15894 uid41935	154
Allochromatium vinosum DSM 180 uid46083	153
Archaeoglobus profundus DSM 5631 uid43493	153
Aromatoleum aromaticum EbN1 uid58231	153
Caldicellulosiruptor hydrothermalis 108 uid60157	153
Corynebacterium glutamicum R uid58897	153
Desulfococcus oleovorans Hxd3 uid58777	153
Ferrimonas balearica DSM 9799 uid53371	153
Methanobrevibacter smithii ATCC 35061 uid58827	153
Methanocaldococcus vulcanius M7 uid41131	153
Methanosaeta thermophila PT uid58469	153
Muricauda ruestringensis DSM 13258 uid72479	153
Natronomonas pharaonis DSM 2160 uid58435	153
Nitrosococcus halophilus Nc4 uid46803	153
Oceanithermus profundus DSM 14977 uid60855	153
Pusillimonas T7 7 uid66391	153
Pyrobaculum arsenaticum DSM 13514 uid58409	153
Sphingobium chlorophenolicum L 1 uid52597	153
Stenotrophomonas maltophilia R551 3 uid58657	153
Thermococcus sibiricus MM 739 uid59399	153
Vibrio cholerae M66 2 uid59355	153
Vibrio cholerae O1 biovar El Tor N16961 uid57623	153
Vibrio fischeri ES114 uid58163	153
Cellvibrio japonicus Ueda107 uid59139	152
Clostridium kluyveri DSM 555 uid58885	152
Corynebacterium efficiens YS 314 uid62905	152
Desulfohalobium retbaense DSM 5692 uid59183	152
Geobacter sulfurreducens PCA uid57743	152
Gluconacetobacter diazotrophicus PAl 5 uid61587	152
Isoptericola variabilis 225 uid67501	152
Methanocaldococcus infernus ME uid48803	152
Propionibacterium acnes KPA171202 uid58101	152
Pseudoxanthomonas suwonensis 11 1 uid62105	152
Sphingomonas wittichii RW1 uid58691	152
Thermococcus gammatolerans EJ3 uid59389	152
Thermococcus kodakarensis KOD1 uid58225	152
Tolumonas auensis DSM 9187 uid59395	152
Acidianus hospitalis W1 uid66875	151
Acidiphilium multivorum AIU301 uid63345	151
Beijerinckia indica ATCC 9039 uid59057	151
Bordetella avium 197N uid61563	151
Brachybacterium faecium DSM 4810 uid58649	151
Clostridium phytofermentans ISDg uid58519	151
Clostridium thermocellum ATCC 27405 uid57917	151
Erwinia pyrifoliae Ep1 96 uid40659	151
Gramella forsetii KT0803 uid58881	151
Marinithermus hydrothermalis DSM 14884 uid65783	151
Novosphingobium aromaticivorans DSM 12444 uid57747	151
Oceanobacillus iheyensis HTE831 uid57867	151
Ochrobactrum anthropi ATCC 49188 uid58921	151
Propionibacterium acnes SK137 uid48071	151
Proteus mirabilis HI4320 uid61599	151
Shewanella denitrificans OS217 uid58263	151
Sphingobium japonicum UT26S uid47077	151
Sulfolobus acidocaldarius DSM 639 uid58379	151
Synechococcus elongatus PCC 7942 uid58045	151
Thermococcus 4557 uid70841	151
Thermococcus onnurineus NA1 uid59043	151
Thermus thermophilus HB27 uid58033	151
Vibrio fischeri MJ11 uid58907	151
Acidovorax ebreus TPSY uid59233	150
Caldicellulosiruptor owensensis OL uid60165	150
Candidatus Nitrospira defluvii uid51175	150
Cellulophaga algicola DSM 14237 uid62159	150
Corynebacterium glutamicum ATCC 13032 uid61611	150
Deinococcus proteolyticus MRP uid63399	150
Eggerthella lenta DSM 2243 uid59079	150
Erwinia amylovora ATCC 49946 uid46943	150
Erwinia amylovora CFBP1430 uid46839	150
Glaciecola nitratireducens FR1064 uid73759	150
Herminiimonas arsenicoxydans uid58291	150
Laribacter hongkongensis HLHK9 uid59265	150
Methanocaldococcus fervens AG86 uid59347	150
Methanococcus voltae A3 uid49529	150
Methanopyrus kandleri AV19 uid57883	150
Pyrococcus abyssi GE5 uid62903	150
Pyrococcus horikoshii OT3 uid57753	150
Ruegeria TM1040 uid58193	150
Synechococcus elongatus PCC 6301 uid58235	150
Synechococcus JA 2 3B a 2 13 uid58537	150
Teredinibacter turnerae T7901 uid59267	150
Thermoanaerobacter wiegelii Rt8 B1 uid52581	150
Thiomonas intermedia K12 uid48825	150
Anoxybacillus flavithermus WK1 uid59135	149
Bordetella parapertussis 12822 uid57615	149
Clostridium perfringens ATCC 13124 uid57901	149
Corynebacterium glutamicum ATCC 13032 uid57905	149
Gluconacetobacter diazotrophicus PAl 5 uid59075	149
Kocuria rhizophila DC2201 uid59099	149
Leadbetterella byssophila DSM 17132 uid60161	149
Leptospira biflexa serovar Patoc Patoc 1 Ames uid58511	149
Leptospira biflexa serovar Patoc Patoc 1 Paris uid58993	149
Magnetospirillum magneticum AMB 1 uid58527	149
Nitrobacter hamburgensis X14 uid58293	149
Photorhabdus luminescens laumondii TTO1 uid61593	149
Rhodomicrobium vannielii ATCC 17100 uid43247	149
Syntrophus aciditrophicus SB uid58539	149
Thermoanaerobacterium xylanolyticum LX 11 uid63163	149
Thermococcus AM4 uid54735	149
Thermus thermophilus HB8 uid58223	149
Xenorhabdus bovienii SS 2004 uid46345	149
Clostridium sticklandii uid59585	149
Bacillus coagulans 2 6 uid68053	148
Bacteroides fragilis NCTC 9343 uid57639	148
Caldivirga maquilingensis IC 167 uid58711	148
Candidatus Desulforudis audaxviator MP104C uid59067	148
Cellulophaga lytica DSM 7489 uid63401	148
Clostridium SY8519 uid68705	148
Desulfurispirillum indicum S5 uid45897	148
Desulfurivibrio alkaliphilus AHT2 uid49487	148
Erwinia tasmaniensis Et1 99 uid59029	148
Methanothermococcus okinawensis IH1 uid51535	148
Novosphingobium PP1Y uid67383	148
Oligotropha carboxidovorans OM5 uid72795	148
Oscillibacter valericigenes Sjm18 20 uid73895	148
Pelagibacterium halotolerans B2 uid74393	148
Pyrococcus NA2 uid66551	148
Ralstonia solanacearum CFBP2957 uid50545	148
Syntrophothermus lipocalidus DSM 12680 uid49527	148
Thermus scotoductus SA 01 uid62273	148
Treponema primitia ZAS 2 uid67367	148
Verminephrobacter eiseniae EF01 2 uid58675	148
Xanthomonas oryzae MAFF 311018 uid58547	148
Acidiphilium cryptum JF 5 uid58447	147
Bacteroides fragilis YCH46 uid58195	147
Clostridium botulinum B Eklund 17B uid59159	147
Clostridium kluyveri NBRC 12016 uid59369	147
Methylococcus capsulatus Bath uid57607	147
Paludibacter propionicigenes WB4 uid60725	147
Parvibaculum lavamentivorans DS 1 uid58739	147
Planctomyces limnophilus DSM 3776 uid48643	147
Pyrobaculum neutrophilum V24Sta uid58421	147
Robiginitalea biformata HTCC2501 uid58285	147
Thermoproteus tenax Kra 1 uid74443	147
Thermosediminibacter oceani DSM 16646 uid51421	147
Xanthomonas oryzae PXO99A uid59131	147
Alkalilimnicola ehrlichii MLHE 1 uid58467	146
Burkholderia pseudomallei MSHR346 uid55259	146
Clostridium botulinum E3 Alaska E43 uid59157	146
Flavobacteriales bacterium HTCC2170 uid51877	146
Kytococcus sedentarius DSM 20547 uid59071	146
Legionella longbeachae NSW150 uid46099	146
Marivirga tractuosa DSM 4126 uid60837	146
Metallosphaera cuprina Ar 4 uid66329	146
Pedobacter heparinus DSM 2366 uid59111	146
Pedobacter saltans DSM 12145 uid61349	146
Pelodictyon phaeoclathratiforme BU 1 uid58173	146
Pyrococcus yayanosii CH1 uid68281	146
Salinibacter ruber M8 uid47323	146
Spirochaeta Buddy uid63633	146
Synechococcus JA 3 3Ab uid58535	146
Syntrophomonas wolfei Goettingen uid58179	146
Thermoanaerobacter X514 uid58589	146
Xenorhabdus nematophila ATCC 19061 uid49133	146
Acidithiobacillus ferrooxidans ATCC 23270 uid57649	145
Chlorobium limicola DSM 245 uid58127	145
Clostridium perfringens 13 uid57681	145
Corynebacterium variabile DSM 44702 uid62003	145
Denitrovibrio acetiphilus DSM 12809 uid46657	145
Exiguobacterium AT1b uid59093	145
Hyphomonas neptunium ATCC 15444 uid58433	145
Ilyobacter polytropus DSM 2926 uid59769	145
Methanococcus aeolicus Nankai 3 uid58823	145
Ruminococcus albus 7 uid51721	145
Slackia heliotrinireducens DSM 20476 uid59051	145
Thermoanaerobacter pseudethanolicus ATCC 33223 uid58339	145
Thermoanaerobacter X513 uid53065	145
Thermodesulfovibrio yellowstonii DSM 11347 uid59257	145
Xanthomonas oryzae KACC 10331 uid58155	145
Alkaliphilus oremlandii OhILAs uid58495	144
Arcobacter nitrofigilis DSM 7299 uid49001	144
Asticcacaulis excentricus CB 48 uid55641	144
Bacteroides thetaiotaomicron VPI 5482 uid62913	144
Caulobacter segnis ATCC 21756 uid41709	144
Chlorobium phaeobacteroides BS1 uid58131	144
gamma proteobacterium HdN1 uid51635	144
Granulibacter bethesdensis CGDNIH1 uid58661	144
Megasphaera elsdenii DSM 20460 uid71135	144
Metallosphaera sedula DSM 5348 uid58717	144
Oligotropha carboxidovorans OM5 uid59155	144
Pseudoalteromonas haloplanktis TAC125 uid58431	144
Shewanella oneidensis MR 1 uid57949	144
Sphingopyxis alaskensis RB2256 uid58351	144
Thermoanaerobacter brockii finnii Ako 1 uid55639	144
Treponema azotonutricium ZAS 9 uid67365	144
Acetohalobium arabaticum DSM 5501 uid51423	143
Acidithiobacillus ferrivorans SS3 uid67387	143
Burkholderia rhizoxinica HKI 454 uid60487	143
Calditerrivibrio nitroreducens DSM 19672 uid60821	143
Edwardsiella ictaluri 93 146 uid59403	143
Ethanoligenens harbinense YUAN 3 uid46255	143
Halanaerobium hydrogeniformans uid60191	143
Pseudoalteromonas SM9913 uid61247	143
Pyrobaculum islandicum DSM 4184 uid58635	143
Segniliparus rotundus DSM 44985 uid49049	143
Thermosynechococcus elongatus BP 1 uid57907	143
Aeropyrum pernix K1 uid57757	142
Bordetella pertussis Tohama I uid57617	142
Brevundimonas subvibrioides ATCC 15264 uid42117	142
Brucella melitensis bv 1 16M uid57735	142
Halorhodospira halophila SL1 uid58473	142
Legionella pneumophila Paris uid58211	142
Listeria monocytogenes 08 5923 uid43727	142
Listeria monocytogenes Clip80459 uid59317	142
Listeria monocytogenes EGD e uid61583	142
Listeria monocytogenes serotype 4b F2365 uid57689	142
Listeria monocytogenes uid43671	142
Listeria seeligeri serovar 1 2b SLCC3954 uid46215	142
Mahella australiensis 50 1 BON uid66917	142
Parabacteroides distasonis ATCC 8503 uid58301	142
Prosthecochloris aestuarii DSM 271 uid58151	142
Staphylococcus pseudintermedius HKU10 03 uid62125	142
Synechococcus CC9605 uid58319	142
Thioalkalivibrio sulfidophilus HL EbGr7 uid59179	142
Acidithiobacillus ferrooxidans ATCC 53993 uid58613	141
Acidothermus cellulolyticus 11B uid58501	141
Aliivibrio salmonicida LFI1238 uid59251	141
Candidatus Chloracidobacterium thermophilum B uid73587	141
Caulobacter crescentus CB15 uid57891	141
Coraliomargarita akajimensis DSM 45221 uid47079	141
Corynebacterium aurimucosum ATCC 700975 uid59409	141
Eggerthella YY7918 uid68707	141
Flexistipes sinusarabici DSM 4947 uid68147	141
Listeria monocytogenes HCC23 uid59203	141
Methylotenera 301 uid49469	141
Salinibacter ruber DSM 13855 uid58513	141
Tepidanaerobacter Re1 uid66873	141
Thermaerobacter marianensis DSM 12885 uid61727	141
Thermoanaerobacter mathranii A3 uid49481	141
Thermodesulfobacterium OPB45 uid68283	141
Thermodesulfobium narugense DSM 14796 uid66601	141
Thermoplasma volcanium GSS1 uid57751	141
Acinetobacter oleivorans DR1 uid50119	140
Ammonifex degensii KC4 uid41053	140
Bacteroides vulgatus ATCC 8482 uid58253	140
Butyrivibrio proteoclasticus B316 uid51489	140
Chlorobaculum parvum NCIB 8327 uid59185	140
Cytophaga hutchinsonii ATCC 33406 uid57651	140
Erythrobacter litoralis HTCC2594 uid58299	140
Eubacterium rectale ATCC 33656 uid59169	140
Jonesia denitrificans DSM 20603 uid59053	140
Methanosphaera stadtmanae DSM 3091 uid58407	140
Picrophilus torridus DSM 9790 uid58041	140
Saccharophagus degradans 2 40 uid57921	140
Thermoanaerobacter italicus Ab9 uid46241	140
Thermoplasma acidophilum DSM 1728 uid61573	140
Xanthomonas albilineans GPE PC73 uid43163	140
Nostoc azollae 0708 uid49725	140
Brucella abortus bv 1 9 941 uid58019	139
Brucella abortus S19 uid58873	139
Brucella melitensis biovar Abortus 2308 uid62937	139
Brucella microti CCM 4915 uid59319	139
Chlorobium phaeobacteroides DSM 266 uid58133	139
Gluconacetobacter xylinus NBRC 3288 uid46523	139
Gluconobacter oxydans 621H uid58239	139
Hirschia baltica ATCC 49814 uid59365	139
Hyphomicrobium denitrificans ATCC 51888 uid50325	139
Ketogulonicigenium vulgare Y25 uid59581	139
Methylobacillus flagellatus KT uid58049	139
Methylovorus glucosetrophus SIP3 4 uid59367	139
Odoribacter splanchnicus DSM 20712 uid63397	139
Propionibacterium freudenreichii shermanii CIRM BIA1 uid49535	139
Synechococcus CC9902 uid58323	139
Acetobacter pasteurianus IFO 3283 01 uid59279	138
Acinetobacter ADP1 uid61597	138
Acinetobacter baumannii AYE uid61637	138
Alcanivorax borkumensis SK2 uid58169	138
Brucella canis ATCC 23365 uid59009	138
Brucella melitensis ATCC 23457 uid59241	138
Brucella pinnipedialis B2 94 uid71131	138
Clostridium perfringens SM101 uid58117	138
Deferribacter desulfuricans SSM1 uid46653	138
Exiguobacterium sibiricum 255 15 uid58053	138
Krokinobacter 4H 3 7 5 uid66593	138
Leptospira interrogans serovar Lai 56601 uid57881	138
Listeria innocua Clip11262 uid61567	138
Listeria ivanovii PAM 55 uid73473	138
Listeria welshimeri serovar 6b SLCC5334 uid61605	138
Methanothermus fervidus DSM 2088 uid60167	138
Micrococcus luteus NCTC 2665 uid59033	138
Spirochaeta caldaria DSM 7334 uid68753	138
Staphylococcus epidermidis RP62A uid57663	138
Staphylococcus lugdunensis HKU09 01 uid46233	138
Synechococcus CC9311 uid58123	138
Treponema brennaborense DSM 12168 uid66607	138
Acinetobacter baumannii AB307 0294 uid59271	137
Bdellovibrio bacteriovorus HD100 uid61595	137
Brucella suis 1330 uid57927	137
Brucella suis ATCC 23445 uid59015	137
Chlorobium luteolum DSM 273 uid58175	137
Fibrobacter succinogenes S85 uid41169	137
Macrococcus caseolyticus JCSC5402 uid59003	137
Methylovorus MP688 uid60723	137
Staphylococcus aureus NCTC 8325 uid57795	137
Staphylococcus aureus Newman uid58839	137
Staphylococcus aureus USA300 FPR3757 uid58555	137
Staphylococcus carnosus TM300 uid59401	137
Synechococcus RCC307 uid61609	137
Corynebacterium diphtheriae NCTC 13129 uid57691	136
Fluviicola taffensis DSM 16823 uid65271	136
Legionella pneumophila Corby uid58733	136
Magnetococcus MC 1 uid57833	136
Pyrolobus fumarii 1A uid73415	136
Sideroxydans lithotrophicus ES 1 uid46801	136
Staphylococcus aureus COL uid57797	136
Staphylococcus aureus ED98 uid41455	136
Staphylococcus aureus JH9 uid58455	136
Staphylococcus aureus MRSA252 uid57839	136
Staphylococcus aureus Mu3 uid58817	136
Staphylococcus aureus MW2 uid57903	136
Synechococcus WH 8102 uid61581	136
Thermosipho africanus TCF52B uid59095	136
Thiobacillus denitrificans ATCC 25259 uid58189	136
Acinetobacter baumannii ACICU uid58765	135
Actinobacillus pleuropneumoniae serovar 5b L20 uid58789	135
Actinobacillus pleuropneumoniae serovar 7 AP76 uid59231	135
Chlorobium tepidum TLS uid57897	135
Flavobacterium branchiophilum FL 15 uid73421	135
Halothermothrix orenii H 168 uid58585	135
Legionella pneumophila 2300 99 Alcoy uid48801	135
Legionella pneumophila Philadelphia 1 uid57609	135
Nitrosococcus watsonii C 113 uid50331	135
Sebaldella termitidis ATCC 33386 uid41865	135
Staphylococcus aureus JH1 uid58457	135
Staphylococcus aureus MSSA476 uid57841	135
Staphylococcus aureus Mu50 uid57835	135
Staphylococcus aureus RF122 uid57661	135
Staphylococcus epidermidis ATCC 12228 uid57861	135
Staphylococcus haemolyticus JCSC1435 uid62919	135
Synechococcus WH 7803 uid61607	135
Corynebacterium kroppenstedtii DSM 44385 uid59411	134
Corynebacterium ulcerans BR AD22 uid68291	134
Corynebacterium urealyticum DSM 7109 uid61639	134
Desulfovibrio desulfuricans ATCC 27774 uid59213	134
Kosmotoga olearia TBF 19 5 1 uid59205	134
Lacinutrix 5H 3 7 4 uid68067	134
Legionella pneumophila Lens uid58209	134
Leptospira interrogans serovar Copenhageni Fiocruz L1 130 uid58065	134
Persephonella marina EX H1 uid58119	134
Prevotella ruminicola 23 uid47507	134
Psychrobacter cryohalolentis K5 uid58373	134
Spirochaeta thermophila DSM 6192 uid53037	134
Staphylococcus aureus N315 uid57837	134
Thermofilum pendens Hrk 5 uid58563	134
Acidimicrobium ferrooxidans DSM 10331 uid59215	133
Acinetobacter baumannii AB0057 uid59083	133
Bacteroides helcogenes P 36 108 uid62135	133
Brucella ovis ATCC 25840 uid58113	133
Candidatus Korarchaeum cryptofilum OPF8 uid58601	133
Maricaulis maris MCS10 uid58689	133
Nitrosococcus oceani ATCC 19707 uid58403	133
Psychrobacter PRwf 1 uid58459	133
Staphylococcus saprophyticus ATCC 15305 uid58411	133
Thioalkalivibrio K90mix uid46181	133
Acidaminococcus fermentans DSM 20731 uid43471	132
Bacteroides salanitronis DSM 18170 uid63269	132
Candidatus Puniceispirillum marinum IMCC1322 uid47081	132
Corynebacterium jeikeium K411 uid58399	132
Croceibacter atlanticus HTCC2559 uid49661	132
Eubacterium eligens ATCC 27750 uid59171	132
Lactobacillus plantarum JDM1 uid59361	132
Polynucleobacter necessarius asymbioticus QLW P1DMWA 1 uid58611	132
Roseburia hominis A2 183 uid73419	132
Sulfuricurvum kujiense DSM 16994 uid60789	132
Thermosipho melanesiensis BI429 uid58683	132
Thiomicrospira crunogena XCL 2 uid58183	132
Clostridium tetani E88 uid57683	131
Corynebacterium pseudotuberculosis FRC41 uid50585	131
Nitrobacter winogradskyi Nb 255 uid58295	131
Staphylococcus aureus USA300 TCH1516 uid58925	131
Thermovibrio ammonificans HB 1 uid62095	131
Actinobacillus pleuropneumoniae serovar 3 JL03 uid58891	130
Carnobacterium 17 4 uid65789	130
Clostridium novyi NT uid58643	130
Hydrogenobacter thermophilus TK 6 uid45927	130
Kangiella koreensis DSM 16069 uid59209	130
Leptospira borgpetersenii serovar Hardjo bovis L550 uid58507	130
Methylotenera mobilis JLW8 uid59373	130
Veillonella parvula DSM 2008 uid41927	130
Aciduliprofundum boonei T469 uid43333	129
Acinetobacter baumannii SDF uid61601	129
Actinobacillus succinogenes 130Z uid58247	129
Arcobacter butzleri RM4018 uid58557	129
Idiomarina loihiensis L2TR uid58087	129
Leptospira borgpetersenii serovar Hardjo bovis JB197 uid58509	129
Pasteurella multocida Pm70 uid57627	129
Sulfurovum NBC37 1 uid58863	129
Thermocrinis albus DSM 14484 uid46231	129
Acidilobus saccharovorans 345 15 uid51395	128
Brachyspira murdochii DSM 12563 uid48819	128
Chlorobium phaeovibrioides DSM 265 uid58129	128
Gallibacterium anatis UMN179 uid66567	128
Ignicoccus hospitalis KIN4 I uid58365	128
Lactobacillus plantarum ST III uid53537	128
Leifsonia xyli CTCB07 uid57759	128
Mannheimia succiniciproducens MBEL55E uid58197	128
Parvularcula bermudensis HTCC2503 uid51641	128
Sulfurimonas autotrophica DSM 16294 uid53043	128
Sulfurospirillum deleyianum DSM 6946 uid41861	128
Acidithiobacillus caldus SM 1 uid70791	127
Corynebacterium resistens DSM 45100 uid50555	127
Flavobacteriaceae bacterium 3519 10 uid59413	127
Nitratiruptor SB155 2 uid58861	127
Nitrosospira multiformis ATCC 25196 uid58361	127
Prochlorococcus marinus MIT 9303 uid58305	127
Sulfurimonas denitrificans DSM 1251 uid58185	127
Thermotoga lettingae TMO uid58419	127
Thermotoga neapolitana DSM 4359 uid59065	127
Thermotoga RQ2 uid58935	127
Caulobacter crescentus NA1000 uid59307	126
Gallionella capsiferriformans ES 2 uid51505	126
Halothiobacillus neapolitanus c2 uid41317	126
Ignisphaera aggregans DSM 17230 uid51875	126
Lactobacillus buchneri NRRL B 30929 uid66205	126
Nitrosomonas europaea ATCC 19718 uid57647	126
Nitrosomonas Is79A3 uid68745	126
Thermanaerovibrio acidaminovorans DSM 6589 uid41925	126
Thermovirga lienii DSM 17291 uid77129	126
Wolinella succinogenes DSM 1740 uid61591	126
Acinetobacter baumannii ATCC 17978 uid58731	125
Aminobacterium colombiense DSM 12261 uid47083	125
Aquifex aeolicus VF5 uid57765	125
Coprothermobacter proteolyticus DSM 5265 uid59253	125
Dictyoglomus thermophilum H 6 12 uid59439	125
Lactobacillus casei Zhang uid50673	125
Nitratifractor salsuginis DSM 16511 uid62183	125
Prochlorococcus marinus MIT 9313 uid57773	125
Rothia dentocariosa ATCC 17931 uid49331	125
Staphylothermus marinus F1 uid58719	125
Streptococcus sanguinis SK36 uid58381	125
Thermotoga thermarum DSM 5069 uid68449	125
Clostridium botulinum BKT015925 uid66203	124
Lactobacillus rhamnosus GG uid59313	124
Nitrosomonas eutropha C91 uid58363	124
Sulfurihydrogenibium YO3AOP1 uid58855	124
Treponema succinifaciens DSM 2489 uid65781	124
Acidaminococcus intestini RyC MR95 uid74445	123
Dictyoglomus turgidum DSM 6724 uid59177	123
Enterococcus faecalis V583 uid57669	123
Hyperthermus butylicus DSM 5456 uid57755	123
Lactobacillus casei BL23 uid59237	123
Mobiluncus curtisii ATCC 43063 uid49695	123
Nautilia profundicola AmH uid59345	123
Spirochaeta coccoides DSM 17374 uid66331	123
Staphylothermus hellenicus DSM 12710 uid45893	123
Streptococcus pneumoniae CGSP14 uid59181	123
Streptococcus pneumoniae Hungary19A 6 uid59117	123
Sulfurihydrogenibium azorense Az Fu1 uid58121	123
Thermotoga maritima MSB8 uid57723	123
Thermotoga naphthophila RKU 10 uid42777	123
Thermotoga petrophila RKU 1 uid58655	123
Weeksella virosa DSM 16922 uid63627	123
Lactobacillus rhamnosus Lc 705 uid59315	122
Petrotoga mobilis SJ95 uid58747	122
Psychrobacter arcticus 273 4 uid58021	122
Streptococcus gallolyticus ATCC BAA 2069 uid63617	122
Streptococcus pneumoniae 70585 uid59125	122
Arcanobacterium haemolyticum DSM 20595 uid49489	121
Fervidobacterium nodosum Rt17 B1 uid58625	121
Haemophilus parainfluenzae T3T1 uid72801	121
Methylacidiphilum infernorum V4 uid59161	121
Nitrosomonas AL212 uid55727	121
Prevotella melaninogenica ATCC 25845 uid51377	121
Streptococcus pneumoniae G54 uid59167	121
Streptococcus pneumoniae TCH8431 19A uid49735	121
Streptococcus pneumoniae TIGR4 uid57857	121
Aggregatibacter aphrophilus NJ8700 uid59407	120
Chlorobium chlorochromatii CaD3 uid58375	120
Cryptobacterium curtum DSM 15641 uid59041	120
Riemerella anatipestifer ATCC 11845 DSM 15868 uid60727	120
Streptococcus pneumoniae 670 6B uid52533	120
Streptococcus pneumoniae AP200 uid52453	120
Tetragenococcus halophilus uid74441	120
Aggregatibacter actinomycetemcomitans D11S 1 uid41333	119
Dehalogenimonas lykanthroporepellens BL DC 9 uid48131	119
Finegoldia magna ATCC 29328 uid58867	119
Francisella TX077308 uid68321	119
Hippea maritima DSM 10411 uid65267	119
Lactobacillus brevis ATCC 367 uid57989	119
Lactobacillus casei ATCC 334 uid57985	119
Nitrosopumilus maritimus SCM1 uid58903	119
Prevotella denticola F0289 uid65091	119
Streptococcus gallolyticus UCN34 uid46061	119
Streptococcus pneumoniae ATCC 700669 uid59287	119
Streptococcus pneumoniae D39 uid58581	119
Streptococcus pneumoniae Taiwan19F 14 uid59119	119
Bifidobacterium dentium Bd1 uid43091	118
Haemophilus parasuis SH0165 uid59273	118
Rothia mucilaginosa uid43093	118
Sodalis glossinidius morsitans uid58553	118
Streptococcus pneumoniae JJA uid59121	118
Streptococcus pneumoniae P1031 uid59123	118
Streptococcus pneumoniae R6 uid57859	118
Brachyspira hyodysenteriae WA1 uid59291	117
Brachyspira pilosicoli 95 1000 uid50609	117
Campylobacter fetus 82 40 uid58545	117
Desulfurobacterium thermolithotrophum DSM 11699 uid63405	117
Francisella philomiragia ATCC 25017 uid59105	117
Lactobacillus fermentum IFO 3956 uid58865	117
Streptococcus oralis Uo5 uid65449	117
Anaerococcus prevotii DSM 20548 uid59219	116
Bifidobacterium longum DJO10A uid58833	116
Bifidobacterium longum JCM 1217 uid62695	116
Capnocytophaga canimorsus Cc5 uid70727	116
Hydrogenobaculum Y04AAS1 uid58857	116
Lactobacillus reuteri DSM 20016 uid58471	116
Lactobacillus reuteri JCM 1112 uid58875	116
Lactococcus lactis KF147 uid42831	116
Zymomonas mobilis NCIMB 11163 uid41019	116
Bifidobacterium bifidum S17 uid59545	115
Bifidobacterium longum JDM301 uid49131	115
Bifidobacterium longum NCC2705 uid57939	115
Desulfurococcus mucosus DSM 2162 uid62227	115
Fusobacterium nucleatum ATCC 25586 uid57885	115
Prochlorococcus marinus MIT 9312 uid58357	115
Streptococcus mutans NN2025 uid46353	115
Streptococcus pasteurianus ATCC 43144 uid68019	115
Treponema denticola ATCC 35405 uid57583	115
Zymomonas mobilis ZM4 uid58095	115
Bifidobacterium longum infantis 157F uid62693	114
Capnocytophaga ochracea DSM 7271 uid59197	114
Desulfurococcus kamchatkensis 1221n uid59133	114
Francisella novicida U112 uid58499	114
Lactobacillus reuteri SD2112 uid55357	114
Lactococcus lactis Il1403 uid57671	114
Leptotrichia buccalis C 1013 b uid59211	114
Mycobacterium leprae Br4923 uid59293	114
Mycobacterium leprae TN uid57697	114
Prochlorococcus marinus MIT 9215 uid58819	114
Prochlorococcus marinus MIT 9301 uid58437	114
Streptococcus agalactiae A909 uid57935	114
Streptococcus dysgalactiae equisimilis GGS 124 uid59103	114
Streptococcus mutans UA159 uid57947	114
Streptococcus pseudopneumoniae IS7493 uid71153	114
Streptococcus salivarius CCHSS3 uid70481	114
Bifidobacterium longum BBMN68 uid60163	113
Bifidobacterium longum infantis ATCC 15697 uid58677	113
Porphyromonas gingivalis ATCC 33277 uid58879	113
Prochlorococcus marinus AS9601 uid58307	113
Prochlorococcus marinus MIT 9515 uid58313	113
Prochlorococcus marinus NATL1A uid58423	113
Prochlorococcus marinus NATL2A uid58359	113
Streptococcus agalactiae 2603V R uid57943	113
Streptococcus suis 98HAH33 uid58665	113
Streptococcus uberis 0140J uid57959	113
Thioalkalimicrobium cyclicum ALM1 uid67391	113
Akkermansia muciniphila ATCC BAA 835 uid58985	112
Haemophilus somnus 2336 uid57979	112
Lactococcus lactis cremoris MG1363 uid58837	112
Lactococcus lactis cremoris SK11 uid57983	112
Leuconostoc mesenteroides ATCC 8293 uid57919	112
Neisseria lactamica 020 06 uid60851	112
Neisseria meningitidis MC58 uid57817	112
Porphyromonas gingivalis TDC60 uid67407	112
Prochlorococcus marinus CCMP1375 uid57995	112
Prochlorococcus marinus pastoris CCMP1986 uid57761	112
Streptococcus agalactiae NEM316 uid61585	112
Streptococcus gordonii Challis substr CH1 uid57667	112
Streptococcus parasanguinis ATCC 15912 uid49313	112
Streptococcus parauberis KCTC 11537 uid67355	112
Waddlia chondrophila WSU 86 1044 uid49531	112
Xylella fastidiosa 9a5c uid57849	112
Campylobacter curvus 525 92 uid58669	111
Coriobacterium glomerans PW2 uid65787	111
Haemophilus somnus 129PT uid57929	111
Neisseria gonorrhoeae NCCP11945 uid59191	111
Parachlamydia acanthamoebae UV7 uid68335	111
Porphyromonas gingivalis W83 uid57641	111
Streptococcus pyogenes MGAS10394 uid58105	111
Streptococcus pyogenes MGAS5005 uid58337	111
Streptococcus pyogenes MGAS6180 uid58335	111
Streptococcus pyogenes MGAS8232 uid57871	111
Streptococcus suis 05ZYH33 uid58663	111
Bifidobacterium adolescentis ATCC 15703 uid58559	110
Bifidobacterium animalis lactis AD011 uid58911	110
Bifidobacterium animalis lactis Bl 04 uid59359	110
Bifidobacterium animalis lactis DSM 10140 uid59357	110
Bifidobacterium bifidum PRL2010 uid59883	110
Helicobacter hepaticus ATCC 51449 uid57737	110
Lactobacillus salivarius UCC118 uid58233	110
Leuconostoc kimchii IMSNU 11154 uid48589	110
Micavibrio aeruginosavorus ARL 13 uid73585	110
Neisseria meningitidis 053442 uid58587	110
Neisseria meningitidis alpha14 uid61649	110
Neisseria meningitidis FAM18 uid57825	110
Streptococcus equi 4047 uid59259	110
Streptococcus mitis B6 uid46097	110
Streptococcus pyogenes M1 GAS uid57845	110
Streptococcus pyogenes MGAS315 uid57911	110
Streptococcus pyogenes SSI 1 uid57895	110
Streptococcus suis ST3 uid66327	110
Thermosphaera aggregans DSM 11486 uid48993	110
Aerococcus urinae ACS 120 V Col10a uid64757	109
Campylobacter jejuni 81116 uid58771	109
Campylobacter jejuni 81 176 uid58503	109
Candidatus Cloacamonas acidaminovorans Evry uid62959	109
Francisella tularensis holarctica FTNF002 00 uid58999	109
Francisella tularensis holarctica LVS uid58595	109
Francisella tularensis WY96 3418 uid58811	109
Leuconostoc C2 uid68743	109
Neisseria meningitidis Z2491 uid57819	109
Olsenella uli DSM 7084 uid51367	109
Prochlorococcus marinus MIT 9211 uid58309	109
Streptococcus pyogenes MGAS10750 uid58575	109
Streptococcus pyogenes MGAS9429 uid58569	109
Streptococcus pyogenes NZ131 uid59035	109
Streptococcus suis P1 7 uid32235	109
Streptococcus suis SC84 uid59323	109
Zymomonas mobilis pomaceae ATCC 29192 uid68445	109
Atopobium parvulum DSM 20469 uid59195	108
Campylobacter jejuni NCTC 11168 ATCC 700819 uid57587	108
Lactococcus garvieae ATCC 49156 uid73413	108
Leuconostoc citreum KM20 uid58481	108
Moraxella catarrhalis BBH18 uid48809	108
Streptococcus equi zooepidemicus MGCS10565 uid59263	108
Streptococcus equi zooepidemicus uid59261	108
Xylella fastidiosa M12 uid58763	108
Xylella fastidiosa Temecula1 uid57869	108
Campylobacter jejuni RM1221 uid57899	107
Francisella tularensis FSC198 uid58693	107
Francisella tularensis mediasiatica FSC147 uid58939	107
Francisella tularensis SCHU S4 uid57589	107
Lactobacillus acidophilus NCFM uid57685	107
Lactobacillus ruminis ATCC 27782 uid73417	107
Streptococcus pyogenes Manfredo uid57847	107
Streptococcus pyogenes MGAS10270 uid58571	107
Streptococcus pyogenes MGAS2096 uid58573	107
Streptococcus suis BM407 uid59321	107
Streptococcus thermophilus LMG 18311 uid58219	107
Cenarchaeum symbiosum A uid61411	106
Clostridiales genomosp BVAB3 UPII9 5 uid46219	106
Haemophilus influenzae F3047 uid62097	106
Lactobacillus delbrueckii bulgaricus ND02 uid60621	106
Leuconostoc gasicomitatum LMG 18811 uid50385	106
Neisseria gonorrhoeae FA 1090 uid57611	106
Xylella fastidiosa M23 uid58809	106
Campylobacter jejuni ICDCCJ07001 uid61249	105
Campylobacter lari RM2100 uid58115	105
Haemophilus influenzae F3031 uid62123	105
Haemophilus influenzae Rd KW20 uid57771	105
Lactobacillus sakei 23K uid58281	105
Streptococcus thermophilus CNRZ1066 uid58221	105
Candidatus Pelagibacter ubique HTCC1062 uid58401	104
Erysipelothrix rhusiopathiae Fujisawa uid68021	104
Haemophilus influenzae 86 028NP uid58093	104
Lactobacillus crispatus ST1 uid48359	104
Campylobacter concisus 13826 uid58667	103
Campylobacter hominis ATCC BAA 381 uid58981	103
Coxiella burnetii Dugway 5J108 111 uid58629	103
Dehalococcoides VS uid42393	103
Francisella tularensis holarctica OSU18 uid58687	103
Lactobacillus acidophilus 30SC uid63605	103
Lactobacillus amylovorus GRL 1112 uid61179	103
Coxiella burnetii CbuK Q154 uid58895	102
Coxiella burnetii RSA 493 uid57631	102
Lactobacillus delbrueckii bulgaricus ATCC BAA 365 uid57987	102
Streptococcus thermophilus LMD 9 uid58327	102
Coxiella burnetii CbuG Q212 uid58893	101
Dehalococcoides ethenogenes 195 uid57763	101
Haemophilus ducreyi 35000HP uid57625	101
Lactobacillus kefiranofaciens ZW3 uid67985	101
Oenococcus oeni PSU 1 uid59417	101
Taylorella asinigenitalis MCE3 uid73771	101
Campylobacter jejuni doylei 269 97 uid58671	100
Coxiella burnetii RSA 331 uid58637	100
Haemophilus influenzae PittEE uid58591	100
Helicobacter bizzozeronii CIII 1 uid68141	100
Lactobacillus delbrueckii bulgaricus ATCC 11842 uid58647	100
Lactobacillus johnsonii FI9785 uid41735	100
Lactobacillus johnsonii NCC 533 uid58029	100
Pediococcus pentosaceus ATCC 25745 uid57981	100
Polynucleobacter necessarius STIR1 uid58967	100
Porphyromonas asaccharolytica DSM 20707 uid66603	100
Candidatus Arthromitus SFB rat Yit uid73425	99
Dehalococcoides BAV1 uid58477	99
Dehalococcoides CBDB1 uid58413	99
Taylorella equigenitalis MCE9 uid62103	99
Candidatus Pelagibacter IMCC9063 uid66305	98
cyanobacterium UCYN A uid43697	98
Elusimicrobium minutum Pei191 uid58949	98
Helicobacter mustelae 12198 uid46647	98
Candidatus Arthromitus SFB mouse Japan uid71379	97
Dehalococcoides GT uid42115	97
Lactobacillus helveticus DPC 4571 uid58761	97
Helicobacter pylori P12 uid59327	96
Lactobacillus gasseri ATCC 33323 uid57687	96
Acholeplasma laidlawii PG 8A uid58901	95
Bartonella grahamii as4aup uid59405	95
Bartonella henselae Houston 1 uid57745	95
Bartonella tribocorum CIP 105476 uid59129	95
Lawsonia intracellularis PHE MN1 00 uid61575	95
Melissococcus plutonius ATCC 35311 uid66803	95
Helicobacter felis ATCC 49179 uid61409	94
Helicobacter pylori 26695 uid57787	94
Candidatus Protochlamydia amoebophila UWE25 uid58079	93
Gardnerella vaginalis ATCC 14019 uid55487	93
Haemophilus influenzae PittGG uid58593	93
Helicobacter pylori B38 uid59415	93
Helicobacter pylori B8 uid49873	93
Helicobacter pylori G27 uid59305	93
Helicobacter pylori SJM180 uid53541	93
Simkania negevensis Z uid68451	92
Bartonella clarridgeiae 73 uid62131	91
Dichelobacter nodosus VCS1703A uid57643	91
Helicobacter pylori HPAG1 uid58517	91
Helicobacter pylori J99 uid57789	91
Bartonella quintana Toulouse uid57635	90
Helicobacter acinonychis Sheeba uid58685	90
Helicobacter pylori PeCan4 uid53539	90
Lactobacillus sanfranciscensis TMW 1 1304 uid72937	90
Gardnerella vaginalis 409 05 uid43211	88
Helicobacter pylori Shi470 uid59165	88
Weissella koreensis KACC 15510 uid68837	86
Bartonella bacilliformis KC583 uid58533	85
Candidatus Hamiltonella defensa 5AT Acyrthosiphon pisum uid59289	85
Rickettsia felis URRWXCal2 uid58331	84
Streptobacillus moniliformis DSM 12112 uid41863	84
Candidatus Ruthia magnifica Cm Calyptogena magnifica uid58645	83
Rickettsia bellii RML369 C uid58405	82
Rickettsia conorii Malish 7 uid57633	82
Candidatus Vesicomyosocius okutanii HA uid59427	80
Rickettsia bellii OSU 85 389 uid58681	80
Rickettsia heilongjiangensis 054 uid70839	76
Candidatus Azobacteroides pseudotrichonymphae genomovar CFP2 uid59163	75
Rickettsia massiliae MTU5 uid58801	75
Rickettsia rickettsii Iowa uid58961	75
Rickettsia africae ESF 5 uid58799	74
Rickettsia akari Hartford uid58161	74
Wolbachia wRi uid59371	73
Rickettsia japonica YH uid73963	72
Rickettsia rickettsii Sheila Smith uid58027	72
Tropheryma whipplei TW08 27 uid57961	72
Tropheryma whipplei Twist uid57705	72
Wolbachia endosymbiont of Culex quinquefasciatus Pel uid61645	72
Candidatus Liberibacter solanacearum CLso ZC1 uid61245	71
Rickettsia peacockii Rustic uid59301	71
Wolbachia endosymbiont of Drosophila melanogaster uid57851	71
Rickettsia canadensis McKiel uid58159	70
Rickettsia prowazekii Madrid E uid61565	70
Candidatus Liberibacter asiaticus psy62 uid59227	69
Orientia tsutsugamushi Ikeda uid58869	69
Rickettsia typhi Wilmington uid58063	69
uncultured Termite group 1 bacterium phylotype Rs D17 uid59059	68
Anaplasma marginale Florida uid58577	67
Anaplasma marginale Maries uid57629	67
Candidatus Amoebophilus asiaticus 5a2 uid58963	67
Orientia tsutsugamushi Boryong uid61621	67
Anaplasma centrale Israel uid42155	66
Ehrlichia canis Jake uid58071	66
Mycoplasma penetrans HF 2 uid57729	66
Ehrlichia ruminantium Gardel uid58245	65
Ehrlichia ruminantium Welgevonden uid58013	65
Ehrlichia ruminantium Welgevonden uid58243	65
Ehrlichia chaffeensis Arkansas uid57933	64
Mesoplasma florum L1 uid58055	64
Treponema pallidum Nichols uid57585	64
Treponema pallidum SS14 uid58977	64
Wolbachia endosymbiont TRS of Brugia malayi uid58107	64
Anaplasma phagocytophilum HZ uid57951	63
Candidatus Midichloria mitochondrii IricVA uid68687	63
Chlamydophila abortus S26 3 uid57963	63
Chlamydophila pneumoniae CWL029 uid57811	63
Chlamydophila pneumoniae J138 uid57829	63
Chlamydophila pneumoniae TW 183 uid57997	63
Neorickettsia risticii Illinois uid58889	63
Neorickettsia sennetsu Miyayama uid57965	63
Treponema paraluiscuniculi Cuniculi A uid68447	63
Chlamydophila caviae GPIC uid57783	62
Borrelia afzelii PKo uid58653	61
Borrelia duttonii Ly uid58791	61
Borrelia recurrentis A1 uid58793	61
Chlamydia trachomatis A HAR 13 uid58333	61
Chlamydophila felis Fe C 56 uid57971	61
Chlamydophila pneumoniae AR39 uid57809	61
Chlamydophila psittaci 6BC uid63621	61
Blattabacterium Blattella germanica Bge uid41533	60
Chlamydia trachomatis 434 Bu uid61633	60
Chlamydia trachomatis B Jali20 OT uid59351	60
Chlamydia trachomatis B TZ1A828 OT uid59349	60
Chlamydia trachomatis D UW 3 CX uid57637	60
Chlamydia trachomatis L2b UCH 1 proctitis uid61635	60
Chlamydia trachomatis L2c uid68843	60
Mycoplasma mycoides capri LC 95010 uid66189	60
Wigglesworthia glossinidia endosymbiont of Glossina brevipalpis uid57853	60
Blattabacterium Periplaneta americana BPLAN uid41287	59
Borrelia bissettii DN127 uid71231	59
Borrelia garinii PBi uid58125	59
Borrelia hermsii DAH uid59225	59
Chlamydophila pecorum E58 uid66295	59
Mycoplasma leachii PG50 uid60849	59
Mycoplasma mycoides SC PG1 uid58031	59
Borrelia burgdorferi ZS7 uid59429	58
Borrelia turicatae 91E135 uid58311	58
Candidatus Blochmannia pennsylvanicus BPEN uid58329	58
Mycoplasma fermentans JER uid53543	58
Mycoplasma fermentans M64 uid62099	58
Candidatus Blochmannia floridanus uid57999	57
Chlamydia muridarum Nigg uid57785	57
Nanoarchaeum equitans Kin4 M uid58009	57
Blattabacterium Mastotermes darwiniensis MADAR uid77127	56
Mycoplasma capricolum ATCC 27343 uid58525	56
Mycoplasma putrefaciens KS1 uid72481	55
Baumannia cicadellinicola Hc Homalodisca coagulata uid58111	54
Mycoplasma agalactiae PG2 uid61619	54
Mycoplasma bovis Hubei 1 uid68691	54
Mycoplasma bovis PG45 uid60859	54
Mycoplasma pulmonis UAB CTIP uid61569	54
Mycoplasma synoviae 53 uid58061	54
Ureaplasma parvum serovar 3 ATCC 27815 uid58887	54
Ureaplasma parvum serovar 3 ATCC 700970 uid57711	54
Ureaplasma urealyticum serovar 10 ATCC 33699 uid59011	54
Mycoplasma agalactiae uid46679	53
Mycoplasma gallisepticum R low uid57993	53
Mycoplasma hyopneumoniae 232 uid58205	53
Buchnera aphidicola APS Acyrthosiphon pisum uid57805	52
Buchnera aphidicola Bp Baizongia pistaciae uid57827	52
Buchnera aphidicola Sg Schizaphis graminum uid57913	52
Mycoplasma crocodyli MP145 uid47087	52
Mycoplasma hyopneumoniae 7448 uid58039	52
Mycoplasma mobile 163K uid58077	52
Mycoplasma hyopneumoniae J uid58059	51
Buchnera aphidicola 5A Acyrthosiphon pisum uid59285	50
Buchnera aphidicola Tuc7 Acyrthosiphon pisum uid59283	50
Mycoplasma hominis ATCC 23114 uid41875	50
Mycoplasma hyorhinis HUB 1 uid51695	50
Mycoplasma conjunctivae uid59325	49
Mycoplasma pneumoniae M129 uid57709	49
Mycoplasma arthritidis 158L3 1 uid58005	48
Mycoplasma genitalium G37 uid57707	46
Borrelia burgdorferi B31 uid57581	45
Candidatus Riesia pediculicola USDA uid46841	44
Onion yellows phytoplasma OY M uid58015	44
Aster yellows witches broom phytoplasma AYWB uid58297	43
Candidatus Phytoplasma mali uid59087	43
Candidatus Phytoplasma australiense uid61641	42
Buchnera aphidicola Cinara tujafilina uid68101	41
Candidatus Moranella endobia PCIT uid68739	41
Buchnera aphidicola Cc Cinara cedri uid58579	40
Mycoplasma haemofelis Langford 1 uid62461	37
Mycoplasma suis KI3806 uid63665	37
Mycoplasma suis Illinois uid61897	36
Candidatus Sulcia muelleri SMDSEM uid59393	29
Candidatus Sulcia muelleri CARI uid52535	28
Ruegeria pomeroyi DSS 3 uid57863	28
Candidatus Sulcia muelleri DMIN uid47075	26
Candidatus Sulcia muelleri GWSS uid58943	26
Candidatus Hodgkinia cicadicola Dsem uid59311	23
Candidatus Zinderia insecticola CARI uid52459	23
Shigella flexneri 2a 301 uid62907	20
Candidatus Carsonella ruddii uid58773	16
Candidatus Tremblaya princeps PCIT uid68741	14
Rhodobacter sphaeroides 2 4 1 uid57653	12
Acetobacterium woodii DSM 1030 uid88073	0
Acetobacter pasteurianus 386B uid214433	0
Acetobacter pasteurianus IFO 3283 01 42C uid158377	0
Acetobacter pasteurianus IFO 3283 03 uid158373	0
Acetobacter pasteurianus IFO 3283 07 uid158381	0
Acetobacter pasteurianus IFO 3283 12 uid158379	0
Acetobacter pasteurianus IFO 3283 22 uid158383	0
Acetobacter pasteurianus IFO 3283 26 uid158531	0
Acetobacter pasteurianus IFO 3283 32 uid158375	0
Acholeplasma brassicae uid222823	0
Acholeplasma palmae J233 uid222824	0
Achromobacter xylosoxidans NBRC 15126 uid232243	0
Achromobacter xylosoxidans uid205255	0
Acidimicrobidae bacterium YM16 304 uid193703	0
Acidovorax KKS102 uid176500	0
Aciduliprofundum MAR08 339 uid184407	0
Acinetobacter baumannii 1656 2 uid158677	0
Acinetobacter baumannii BJAB07104 uid210971	0
Acinetobacter baumannii BJAB0715 uid210972	0
Acinetobacter baumannii BJAB0868 uid210973	0
Acinetobacter baumannii D1279779 uid190222	0
Acinetobacter baumannii MDR TJ uid162739	0
Acinetobacter baumannii MDR ZJ06 uid158685	0
Acinetobacter baumannii TCDC AB0715 uid158679	0
Acinetobacter baumannii TYTH 1 uid176498	0
Acinetobacter baumannii ZW85 1 uid231518	0
Acinetobacter calcoaceticus PHEA 2 uid83123	0
Actinobacillus suis H91 0380 uid176363	0
Actinoplanes friuliensis DSM 7358 uid226110	0
Actinoplanes missouriensis 431 uid158169	0
Actinoplanes N902 109 uid202219	0
Actinoplanes SE50 110 uid162333	0
Adlercreutzia equolifaciens DSM 19450 uid223286	0
Advenella kashmirensis WT001 uid80859	0
Aequorivita sublithincola DSM 14238 uid168181	0
Aeromonas hydrophila ML09 119 uid205540	0
Aeropyrum camini SY1 JCM 12091 uid222311	0
Aggregatibacter actinomycetemcomitans ANH9381 uid80743	0
Aggregatibacter actinomycetemcomitans D7S 1 uid46989	0
Agromonas oligotrophica S58 uid192186	0
Alcanivorax dieselolei B5 uid176364	0
Alicyclobacillus acidocaldarius Tc 4 1 uid158681	0
Alistipes finegoldii DSM 17242 uid168180	0
Alistipes shahii WAL 8301 uid197175	0
alpha proteobacterium HIMB59 uid175778	0
alpha proteobacterium HIMB5 uid175779	0
Alteromonas macleodii AltDE1 uid179068	0
Alteromonas macleodii ATCC 27126 uid55253	0
Alteromonas macleodii Aegean Sea MED64 uid231689	0
Alteromonas macleodii Balearic Sea AD45 uid176366	0
Alteromonas macleodii Black Sea 11 uid176365	0
Alteromonas macleodii Deep ecotype uid58251	0
Alteromonas macleodii English Channel 615 uid210781	0
Alteromonas macleodii English Channel 673 uid176367	0
Alteromonas macleodii Ionian Sea U4 uid210780	0
Alteromonas macleodii Ionian Sea U7 uid210785	0
Alteromonas macleodii Ionian Sea U8 uid210782	0
Alteromonas macleodii Ionian Sea UM4b uid210784	0
Alteromonas macleodii Ionian Sea UM7 uid210783	0
Amphibacillus xylanus NBRC 15112 uid176453	0
Amycolatopsis mediterranei RB uid216089	0
Amycolatopsis mediterranei S699 uid158689	0
Amycolatopsis mediterranei S699 uid171830	0
Amycolatopsis orientalis HCCB10007 uid203791	0
Anabaena 90 uid179383	0
Anabaena cylindrica PCC 7122 uid183339	0
Anaerobaculum mobile DSM 13181 uid168323	0
Anaplasma marginale Dawn uid226994	0
Anaplasma marginale Gypsy Plains uid227217	0
Anaplasma phagocytophilum Dog2 uid213225	0
Anaplasma phagocytophilum HZ2 uid213224	0
Anaplasma phagocytophilum JM uid213223	0
Archaeoglobus sulfaticallidus PM70 1 uid201033	0
archaeon Mx1201 uid196597	0
Arcobacter butzleri 7h1h uid200766	0
Arcobacter butzleri ED 1 uid158699	0
Arcobacter L uid158135	0
Arthrobacter Rue61a uid174511	0
Arthrospira platensis NIES 39 uid197171	0
Azoarcus KH32C uid193704	0
Azospirillum brasilense Sp245 uid162161	0
Azospirillum lipoferum 4B uid82343	0
Azotobacter vinelandii CA6 uid198830	0
Azotobacter vinelandii CA uid198829	0
Bacillus 1NLA3E uid81841	0
Bacillus amyloliquefaciens CC178 uid226115	0
Bacillus amyloliquefaciens IT 45 uid181617	0
Bacillus amyloliquefaciens LFB112 uid232246	0
Bacillus amyloliquefaciens LL3 uid158133	0
Bacillus amyloliquefaciens plantarum AS43 3 uid183682	0
Bacillus amyloliquefaciens plantarum CAU B946 uid84215	0
Bacillus amyloliquefaciens plantarum NAU B3 uid222816	0
Bacillus amyloliquefaciens plantarum UCMB5033 uid215237	0
Bacillus amyloliquefaciens plantarum UCMB5036 uid190705	0
Bacillus amyloliquefaciens plantarum UCMB5113 uid215236	0
Bacillus amyloliquefaciens plantarum YAU B9601 Y2 uid159001	0
Bacillus amyloliquefaciens TA208 uid158701	0
Bacillus amyloliquefaciens XH7 uid158881	0
Bacillus amyloliquefaciens Y2 uid165195	0
Bacillus anthracis A2012 uid54101	0
Bacillus anthracis H9401 uid162021	0
Bacillus cereus E33L uid58103	0
Bacillus cereus F837 76 uid83611	0
Bacillus cereus FRI 35 uid173403	0
Bacillus cereus NC7401 uid82815	0
Bacillus infantis NRRL B 14911 uid222804	0
Bacillus JS uid162189	0
Bacillus licheniformis 9945A uid207072	0
Bacillus licheniformis DSM 13 ATCC 14580 uid58199	0
Bacillus megaterium WSH 002 uid159841	0
Bacillus subtilis 6051 HGW uid193706	0
Bacillus subtilis BAB 1 uid195461	0
Bacillus subtilis BSP1 uid184010	0
Bacillus subtilis natto BEST195 uid183001	0
Bacillus subtilis PY79 uid229877	0
Bacillus subtilis QB928 uid173926	0
Bacillus subtilis RO NN 1 uid158879	0
Bacillus subtilis XF 1 uid189187	0
Bacillus thuringiensis Bt407 uid177931	0
Bacillus thuringiensis HD 771 uid173374	0
Bacillus thuringiensis HD 789 uid173860	0
Bacillus thuringiensis MC28 uid176369	0
Bacillus thuringiensis serovar chinensis CT 43 uid158151	0
Bacillus thuringiensis serovar finitimus YBT 020 uid158875	0
Bacillus thuringiensis serovar IS5056 uid190186	0
Bacillus thuringiensis serovar kurstaki HD73 uid189188	0
Bacillus thuringiensis YBT 1518 uid229419	0
Bacillus toyonensis BCT 7112 uid227218	0
Bacteriovorax marinus SJ uid82341	0
bacterium BT 1 uid184079	0
Bacteroides CF50 uid222805	0
Bacteroides fragilis 638R uid84217	0
Bacteroides uniformis uid13130	0
Bacteroides xylanisolvens XB1A uid197168	0
Bartonella australis Aust NH1 uid189950	0
Bartonella quintana RM 11 uid174512	0
Bartonella vinsonii berkhoffii Winnie uid189951	0
Bdellovibrio bacteriovorus Tiberius uid182482	0
Bdellovibrio exovorus JSS uid194119	0
Belliella baltica DSM 15883 uid168182	0
beta proteobacterium CB uid191340	0
Bibersteinia trehalosi 192 uid193709	0
Bifidobacterium animalis ATCC 25527 uid162513	0
Bifidobacterium animalis lactis ATCC 27673 uid222803	0
Bifidobacterium animalis lactis B420 uid163691	0
Bifidobacterium animalis lactis BB 12 uid158871	0
Bifidobacterium animalis lactis Bi 07 uid163693	0
Bifidobacterium animalis lactis Bl12 uid210081	0
Bifidobacterium animalis lactis BLC1 uid158867	0
Bifidobacterium animalis lactis CNCM I 2494 uid158869	0
Bifidobacterium animalis lactis V9 uid158865	0
Bifidobacterium asteroides PRL2011 uid176921	0
Bifidobacterium bifidum BGN4 uid167988	0
Bifidobacterium breve ACS 071 V Sch8b uid158863	0
Bifidobacterium breve UCC2003 uid193702	0
Bifidobacterium longum F8 uid197184	0
Bifidobacterium longum infantis ATCC 15697 uid159865	0
Bifidobacterium longum KACC 91563 uid158861	0
Bifidobacterium thermophilum RBL67 uid193770	0
Blastococcus saxobsidens DD2 uid89391	0
Blattabacterium Blaberus giganteus uid165873	0
Blattabacterium Blatta orientalis Tarazona uid188115	0
Blattabacterium Cryptocercus punctulatus Cpu uid81083	0
Blattabacterium Nauphoeta cinerea uid222815	0
Blattabacterium Panesthia angustipennis spadica BPAA uid193717	0
Bordetella bronchiseptica 253 uid178913	0
Bordetella bronchiseptica MO149 uid177517	0
Bordetella parapertussis 18323 uid175569	0
Bordetella parapertussis Bpp5 uid177516	0
Bordetella pertussis CS uid158859	0
Borrelia afzelii HLJ01 uid177930	0
Borrelia afzelii PKo uid159867	0
Borrelia burgdorferi CA382 uid214794	0
Borrelia burgdorferi JD1 uid161197	0
Borrelia burgdorferi N40 uid161241	0
Borrelia crocidurae Achema uid162335	0
Borrelia garinii BgVir uid162165	0
Borrelia garinii NMJW1 uid177081	0
Borrelia miyamotoi LB 2001 uid215233	0
Borrelia valaisiana VS116 uid54823	0
Brachyspira intermedia PWS A uid158369	0
Brachyspira pilosicoli B2904 uid175255	0
Brachyspira pilosicoli P43 6 78 uid184077	0
Brachyspira pilosicoli WesB uid175256	0
Bradyrhizobium japonicum USDA 6 uid158851	0
Bradyrhizobium S23321 uid158167	0
Brucella abortus A13334 uid83615	0
Brucella canis HSK A52141 uid83613	0
Brucella ceti TE10759 12 uid229880	0
Brucella ceti TE28753 12 uid229879	0
Brucella melitensis M28 uid158857	0
Brucella melitensis M5 90 uid158855	0
Brucella melitensis NI uid158853	0
Brucella suis 1330 uid159871	0
Brucella suis VBI22 uid83617	0
Buchnera aphidicola Ak Acyrthosiphon kondoi uid158533	0
Buchnera aphidicola JF98 Acyrthosiphon pisum uid158845	0
Buchnera aphidicola JF99 Acyrthosiphon pisum uid158847	0
Buchnera aphidicola LL01 Acyrthosiphon pisum uid158843	0
Buchnera aphidicola TLW03 Acyrthosiphon pisum uid158849	0
Buchnera aphidicola Ua Uroleucon ambrosiae uid158535	0
Burkholderia cepacia GG4 uid173858	0
Burkholderia KJ006 uid165871	0
Burkholderia phenoliruptrix BR3459a uid176370	0
Burkholderia pseudomallei 1026b uid162511	0
Burkholderia pseudomallei BPC006 uid174460	0
Burkholderia pseudomallei MSHR305 uid213227	0
Burkholderia pseudomallei NCTC 13179 uid226109	0
Burkholderia RPE64 uid205541	0
Burkholderia thailandensis MSMB121 uid201037	0
Burkholderia YI23 uid81081	0
butyrate producing bacterium SM4 1 uid197180	0
butyrate producing bacterium SS3 4 uid197159	0
butyrate producing bacterium SSC 2 uid197181	0
Butyrivibrio fibrisolvens uid197155	0
Caldilinea aerophila DSM 14535 NBRC 104270 uid158165	0
Caldisericum exile AZM16c01 uid158173	0
Caldisphaera lagunensis DSM 15908 uid183486	0
Calothrix PCC 6303 uid183109	0
Calothrix PCC 7507 uid182930	0
Campylobacter 03 427 uid226993	0
Campylobacter coli 15 537360 uid226113	0
Campylobacter coli 76339 uid217050	0
Campylobacter coli CVM N29710 uid219322	0
Campylobacter jejuni 00 2425 uid219359	0
Campylobacter jejuni 00 2426 uid219324	0
Campylobacter jejuni 00 2538 uid219325	0
Campylobacter jejuni 00 2544 uid219326	0
Campylobacter jejuni 4031 uid222817	0
Campylobacter jejuni IA3902 uid159531	0
Campylobacter jejuni M1 uid159535	0
Campylobacter jejuni NCTC 11168 BN148 uid174152	0
Campylobacter jejuni PT14 uid176499	0
Campylobacter jejuni S3 uid159533	0
candidate division SR1 bacterium RAAC1 SR1 1 uid230714	0
candidate division WWE3 bacterium RAAC2 WWE3 1 uid230713	0
Candidatus Arthromitus SFB mouse Yit uid159517	0
Candidatus Blochmannia chromaiodes 640 uid185308	0
Candidatus Blochmannia vafer BVAF uid62083	0
Candidatus Caldiarchaeum subterraneum uid227223	0
Candidatus Carsonella ruddii CE isolate Thao2000 uid172732	0
Candidatus Carsonella ruddii CS isolate Thao2000 uid172733	0
Candidatus Carsonella ruddii DC uid213383	0
Candidatus Carsonella ruddii HC isolate Thao2000 uid172734	0
Candidatus Carsonella ruddii HT isolate Thao2000 uid172735	0
Candidatus Carsonella ruddii PC isolate NHV uid172736	0
Candidatus Kinetoplastibacterium blastocrithidii TCC012E uid189752	0
Candidatus Kinetoplastibacterium blastocrithidii ex Strigomonas culicis uid183629	0
Candidatus Kinetoplastibacterium crithidii TCC036E uid189749	0
Candidatus Kinetoplastibacterium crithidii ex Angomonas deanei ATCC 30255 uid183630	0
Candidatus Kinetoplastibacterium desouzaii TCC079E uid189750	0
Candidatus Kinetoplastibacterium galatii TCC219 uid189751	0
Candidatus Kinetoplastibacterium oncopeltii TCC290E uid189840	0
Candidatus Liberibacter americanus Sao Paulo uid227424	0
Candidatus Liberibacter asiaticus gxpsy uid193764	0
Candidatus Methylomirabilis oxyfera uid161981	0
Candidatus Moranella endobia PCVAL uid197215	0
Candidatus Mycoplasma haemolamae Purdue uid171259	0
Candidatus Mycoplasma haemominutum Birmingham 1 uid197195	0
Candidatus Nasuia deltocephalinicola NAS ALF uid214084	0
Candidatus Nitrosopumilus AR2 uid176130	0
Candidatus Nitrosopumilus koreensis AR1 uid176129	0
Candidatus Nitrososphaera gargensis Ga9 2 uid176707	0
Candidatus Phytoplasma solani 284 09 uid225030	0
Candidatus Portiera aleyrodidarum BT B uid173859	0
Candidatus Portiera aleyrodidarum BT B uid176373	0
Candidatus Portiera aleyrodidarum BT QVLC uid175570	0
Candidatus Portiera aleyrodidarum BT QVLC uid176374	0
Candidatus Portiera aleyrodidarum TV uid195460	0
Candidatus Rickettsia amblyommii GAT 30V uid156845	0
Candidatus Saccharibacteria bacterium RAAC3 TM7 1 uid230715	0
Candidatus Saccharobacterium alaburgensis uid203361	0
Candidatus Sulcia muelleri Sulcia ALF uid214083	0
Candidatus Tremblaya phenacola PAVE uid209173	0
Candidatus Tremblaya princeps PCVAL uid159519	0
Candidatus Uzinura diaspidicola ASNER uid186740	0
Cardinium endosymbiont cEper1 of Encarsia pergandiella uid175524	0
Carnobacterium maltaromaticum LMA28 uid179370	0
Carnobacterium WN1359 uid225603	0
Chamaesiphon minutus PCC 6605 uid183005	0
Chlamydia pecorum P787 uid221292	0
Chlamydia pecorum PV3056 3 uid221290	0
Chlamydia pecorum W73 uid221291	0
Chlamydia psittaci 01DC12 uid179070	0
Chlamydia psittaci 84 55 uid175571	0
Chlamydia psittaci CP3 uid175578	0
Chlamydia psittaci GR9 uid175572	0
Chlamydia psittaci M56 uid175576	0
Chlamydia psittaci MN uid175573	0
Chlamydia psittaci NJ1 uid175579	0
Chlamydia psittaci VS225 uid175574	0
Chlamydia psittaci WC uid175577	0
Chlamydia psittaci WS RT E30 uid175575	0
Chlamydia trachomatis A2497 uid159863	0
Chlamydia trachomatis A2497 uid159993	0
Chlamydia trachomatis A 363 uid196769	0
Chlamydia trachomatis A 5291 uid196770	0
Chlamydia trachomatis A 7249 uid196771	0
Chlamydia trachomatis C TW 3 uid232251	0
Chlamydia trachomatis D EC uid159881	0
Chlamydia trachomatis D LC uid159879	0
Chlamydia trachomatis D SotonD1 uid196772	0
Chlamydia trachomatis D SotonD5 uid196773	0
Chlamydia trachomatis D SotonD6 uid196774	0
Chlamydia trachomatis E 11023 uid161369	0
Chlamydia trachomatis E 150 uid161403	0
Chlamydia trachomatis E Bour uid196775	0
Chlamydia trachomatis E C599 uid222812	0
Chlamydia trachomatis E SotonE4 uid196776	0
Chlamydia trachomatis E SotonE8 uid196777	0
Chlamydia trachomatis E SW3 uid167483	0
Chlamydia trachomatis F SW4 uid167484	0
Chlamydia trachomatis F SW5 uid167485	0
Chlamydia trachomatis F SWFPminus uid222813	0
Chlamydia trachomatis G 11074 uid161409	0
Chlamydia trachomatis G 11222 uid161361	0
Chlamydia trachomatis G 9301 uid161377	0
Chlamydia trachomatis G 9768 uid161353	0
Chlamydia trachomatis G SotonG1 uid196779	0
Chlamydia trachomatis Ia SotonIa1 uid196780	0
Chlamydia trachomatis IU824 uid193712	0
Chlamydia trachomatis IU888 uid193713	0
Chlamydia trachomatis J 6276tet1 uid213394	0
Chlamydia trachomatis K SotonK1 uid196782	0
Chlamydia trachomatis L1 115 uid196784	0
Chlamydia trachomatis L1 224 uid196785	0
Chlamydia trachomatis L1 440 LN uid196783	0
Chlamydia trachomatis L2b 795 uid196791	0
Chlamydia trachomatis L2b 8200 07 uid196787	0
Chlamydia trachomatis L2b Ams1 uid196792	0
Chlamydia trachomatis L2b Ams2 uid196793	0
Chlamydia trachomatis L2b Ams3 uid196794	0
Chlamydia trachomatis L2b Ams4 uid196795	0
Chlamydia trachomatis L2b Ams5 uid196796	0
Chlamydia trachomatis L2b Canada1 uid196798	0
Chlamydia trachomatis L2b Canada2 uid196799	0
Chlamydia trachomatis L2b CV204 uid196790	0
Chlamydia trachomatis L2b LST uid196789	0
Chlamydia trachomatis L2b UCH 2 uid196788	0
Chlamydia trachomatis L2 25667R uid196786	0
Chlamydia trachomatis L2 434 Bu f uid198644	0
Chlamydia trachomatis L2 434 Bu i uid198643	0
Chlamydia trachomatis L3 404 LN uid196797	0
Chlamydia trachomatis RC F 69 uid213385	0
Chlamydia trachomatis RC F s 342 uid213391	0
Chlamydia trachomatis RC F s 852 uid213387	0
Chlamydia trachomatis RC J 943 uid213388	0
Chlamydia trachomatis RC J 953 uid213389	0
Chlamydia trachomatis RC J 966 uid213393	0
Chlamydia trachomatis RC J 971 uid213395	0
Chlamydia trachomatis RC J s 122 uid213392	0
Chlamydia trachomatis RC L2 55 uid213396	0
Chlamydia trachomatis RC L2 s 3 uid213390	0
Chlamydia trachomatis RC L2 s 46 uid213386	0
Chlamydia trachomatis Sweden2 uid161995	0
Chlamydia trachomatis uid196778	0
Chlamydia trachomatis uid196781	0
Chlamydia trachomatis uid196800	0
Chlamydophila pneumoniae LPCoLN uid159529	0
Chlamydophila psittaci 01DC11 uid159527	0
Chlamydophila psittaci 02DC15 uid159521	0
Chlamydophila psittaci 08DC60 uid159525	0
Chlamydophila psittaci 6BC uid159845	0
Chlamydophila psittaci C19 98 uid159523	0
Chlamydophila psittaci Mat116 uid189026	0
Chlamydophila psittaci RD1 uid162063	0
Chroococcidiopsis thermalis PCC 7203 uid183002	0
Chthonomonas calidirosea T49 uid208678	0
Clavibacter michiganensis nebraskensis NCPPB 2581 uid195908	0
Clavibacter michiganensis sepedonicus uid61577	0
Clostridium acetobutylicum EA 2018 uid159515	0
Clostridium acidurici 9a uid176126	0
Clostridium autoethanogenum DSM 10061 uid225029	0
Clostridium BNL1100 uid84307	0
Clostridium botulinum F 230613 uid159513	0
Clostridium botulinum H04402 065 uid162091	0
Clostridium cf saccharolyticum K10 uid197201	0
Clostridium clariflavum DSM 19732 uid82345	0
Clostridium difficile BI1 uid158363	0
Clostridium pasteurianum BC1 uid201478	0
Clostridium saccharobutylicum DSM 13864 uid223284	0
Clostridium saccharoperbutylacetonicum ATCC 27021 uid189747	0
Clostridium stercorarium DSM 8532 uid186819	0
Clostridium stercorarium DSM 8532 uid195569	0
Clostridium tetani 12124569 uid227214	0
Clostridium thermocellum DSM 1313 uid161989	0
Comamonadaceae bacterium CR uid223378	0
Coprococcus ART55 1 uid197176	0
Coprococcus catus GD 7 uid197174	0
Corallococcus coralloides DSM 2259 uid157997	0
Corynebacterium argentoratense DSM 44202 uid217419	0
Corynebacterium callunae DSM 20147 uid193714	0
Corynebacterium diphtheriae 241 uid83607	0
Corynebacterium diphtheriae 31A uid84309	0
Corynebacterium diphtheriae BH8 uid84311	0
Corynebacterium diphtheriae C7 beta uid84313	0
Corynebacterium diphtheriae CDCE 8392 uid84295	0
Corynebacterium diphtheriae HC01 uid84297	0
Corynebacterium diphtheriae HC02 uid84317	0
Corynebacterium diphtheriae HC03 uid84299	0
Corynebacterium diphtheriae HC04 uid84301	0
Corynebacterium diphtheriae INCA 402 uid83605	0
Corynebacterium diphtheriae PW8 uid84303	0
Corynebacterium diphtheriae VA01 uid84305	0
Corynebacterium glutamicum ATCC 13032 uid193708	0
Corynebacterium glutamicum MB001 uid214793	0
Corynebacterium glutamicum SCgG1 uid207285	0
Corynebacterium glutamicum SCgG2 uid207286	0
Corynebacterium halotolerans YIM 70093 DSM 44683 uid189953	0
Corynebacterium maris DSM 45190 uid214081	0
Corynebacterium pseudotuberculosis 1002 uid159677	0
Corynebacterium pseudotuberculosis 1 06 A uid159665	0
Corynebacterium pseudotuberculosis 258 uid167260	0
Corynebacterium pseudotuberculosis 267 uid162175	0
Corynebacterium pseudotuberculosis 316 uid89381	0
Corynebacterium pseudotuberculosis 31 uid162167	0
Corynebacterium pseudotuberculosis 3 99 5 uid83609	0
Corynebacterium pseudotuberculosis 42 02 A uid159669	0
Corynebacterium pseudotuberculosis C231 uid159675	0
Corynebacterium pseudotuberculosis CIP 52 97 uid159667	0
Corynebacterium pseudotuberculosis Cp162 uid168258	0
Corynebacterium pseudotuberculosis I19 uid159673	0
Corynebacterium pseudotuberculosis P54B96 uid157909	0
Corynebacterium pseudotuberculosis PAT10 uid159671	0
Corynebacterium terpenotabidum Y 11 uid210639	0
Corynebacterium ulcerans 0102 uid169879	0
Corynebacterium ulcerans 809 uid159659	0
Corynebacterium urealyticum DSM 7111 uid188688	0
Crinalium epipsammum PCC 9333 uid183113	0
Cronobacter sakazakii 45402 uid231516	0
Cronobacter sakazakii ES15 uid167045	0
Cronobacter sakazakii Sp291 uid189241	0
Cronobacter turicensis z3032 uid40821	0
Cyanobacterium aponinum PCC 10605 uid183340	0
Cyanobacterium stanieri PCC 7202 uid183337	0
Cyanobium gracile PCC 6307 uid182931	0
Cycloclasticus P1 uid176368	0
Cycloclasticus zancles 7 ME uid214092	0
Cylindrospermum stagnale PCC 7417 uid183111	0
Dactylococcopsis salina PCC 8305 uid183341	0
Dechlorosoma suillum PS uid81439	0
Dehalobacter 11DCA uid177715	0
Dehalobacter CF uid177714	0
Dehalococcoides mccartyi BTF08 uid190183	0
Dehalococcoides mccartyi DCMB5 uid190184	0
Dehalococcoides mccartyi GY50 uid230266	0
Deinococcus gobiensis I 0 uid162509	0
Deinococcus peraridilitoris DSM 19664 uid183485	0
delta proteobacterium BABL1 uid230716	0
Desulfitobacterium dehalogenans ATCC 51507 uid82553	0
Desulfitobacterium dichloroeliminans LMG P 21439 uid82555	0
Desulfobacula toluolica Tol2 uid175777	0
Desulfocapsa sulfexigens DSM 10523 uid189952	0
Desulfomonile tiedjei DSM 6799 uid168320	0
Desulfosporosinus acidiphilus SJ4 uid156759	0
Desulfosporosinus meridiei DSM 13257 uid75097	0
Desulfosporosinus orientis DSM 765 uid82939	0
Desulfotomaculum gibsoniae DSM 7213 uid76945	0
Desulfovibrio africanus Walvis Bay uid66847	0
Desulfovibrio desulfuricans ND132 uid63159	0
Desulfovibrio gigas DSM 1382 uid221293	0
Desulfovibrio hydrothermalis AM13 DSM 14728 uid184831	0
Desulfovibrio piezophilus C1TLV30 uid190704	0
Desulfovibrio vulgaris RCH1 uid161961	0
Desulfurococcus fermentans DSM 16532 uid75119	0
Echinicola vietnamensis DSM 17526 uid184076	0
Ectothiorhodospiraceae bacterium M19 40 uid199898	0
Edwardsiella tarda C07 087 uid193773	0
Edwardsiella tarda FL6 60 uid159657	0
Ehrlichia muris AS145 uid232250	0
Emticicia oligotrophica DSM 17448 uid177079	0
Enterobacteriaceae bacterium FGI 57 uid185181	0
Enterobacter aerogenes EA1509E uid187411	0
Enterobacter cloacae dissolvens SDM uid168997	0
Enterobacter cloacae EcWSU1 uid80739	0
Enterobacter cloacae ENHKU01 uid172463	0
Enterobacter cloacae NCTC 9394 uid197202	0
Enterobacter R4 368 uid208672	0
Enterococcus 7L76 uid197170	0
Enterococcus casseliflavus EC20 uid55693	0
Enterococcus faecalis 62 uid159663	0
Enterococcus faecalis D32 uid171261	0
Enterococcus faecalis OG1RF uid54927	0
Enterococcus faecalis Symbioflor 1 uid183342	0
Enterococcus faecium Aus0004 uid87025	0
Enterococcus faecium Aus0085 uid214432	0
Enterococcus faecium DO uid55353	0
Enterococcus faecium NRRL B 2354 uid188477	0
Enterococcus hirae ATCC 9790 uid70619	0
Enterococcus mundtii QU 25 uid229420	0
Erwinia Ejp617 uid159955	0
Erwinia pyrifoliae DSM 12163 uid159693	0
Erysipelothrix rhusiopathiae SY1027 uid206518	0
Escherichia blattae DSM 4481 uid165043	0
Escherichia coli 042 uid161985	0
Escherichia coli ABU 83972 uid161975	0
Escherichia coli APEC O78 uid187277	0
Escherichia coli BL21 DE3 uid161947	0
Escherichia coli BL21 DE3 uid161949	0
Escherichia coli DH1 uid161951	0
Escherichia coli DH1 uid162051	0
Escherichia coli ETEC H10407 uid161993	0
Escherichia coli IHE3034 uid162007	0
Escherichia coli JJ1886 uid226103	0
Escherichia coli KO11FL uid162099	0
Escherichia coli KO11FL uid52593	0
Escherichia coli K 12 substr MDS42 uid193705	0
Escherichia coli K 12 substr MG1655 uid57779	0
Escherichia coli K 12 substr W3110 uid161931	0
Escherichia coli LF82 uid161965	0
Escherichia coli LY180 uid219461	0
Escherichia coli NA114 uid162139	0
Escherichia coli O104 H4 2009EL 2050 uid175905	0
Escherichia coli O104 H4 2009EL 2071 uid176128	0
Escherichia coli O104 H4 2011C 3493 uid176127	0
Escherichia coli O55 H7 RM12579 uid162153	0
Escherichia coli O7 K1 CE10 uid162115	0
Escherichia coli O83 H1 NRG 857C uid161987	0
Escherichia coli P12b uid162061	0
Escherichia coli PMV 1 uid219679	0
Escherichia coli SE15 uid161939	0
Escherichia coli UM146 uid162043	0
[truncated: 776 more rows]
