# Supplementary material for: The GC Content as a Main Factor Shaping the Amino Acid Usage During Bacterial Evolution Process
Source: Front Microbiol. 2018 Dec 7;9:2948. doi: 10.3389/fmicb.2018.02948 (PMC6292993; doi:10.3389/fmicb.2018.02948)
Supplement: TABLE S2 — Functional and taxonomic characterization of the LUCA’s gene families potentially present in LUCA. [file Data_Sheet_2.xlsx]

## Sheet: Sheet1
Table S2 Functional and taxonomic characterization of the LUCA's gene families potentially present in LUCA
Functional category	Excluded or Included*	Gene name	Product	COG-ID	COG category	Kegg ortology (KO)	Pfam
Ribosome biogenesis	Excluded	ychF	Ribosome-binding ATPase YchF, GTP1/OBG family	COG0012	Information (J)	K06942	PF01926.19|MMR_HSR1:PF08438.6|MMR_HSR1_C:PF02824.17|TGS
	Included	rplK	Ribosomal protein L11	COG0080	Information (J)	K02867	PF03946.10|Ribosomal_L11_N:PF00298.15|Ribosomal_L11
	Excluded	hflX	50S ribosomal subunit-associated GTPase HflX	COG2262	Information (J)	K03665	PF13167.2|GTP-bdg_N:PF16360.1|GTP-bdg_M:PF01926.19|MMR_HSR1
	Excluded	rsgA	Putative ribosome biogenesis GTPase RsgA	COG1162	Information (J)	K06949	PF03193.12|DUF258
	Included	drg	Ribosome-interacting GTPase 1	COG1163	Information (J)	K06944	PF01926.19|MMR_HSR1:PF16897.1|MMR_HSR1_Xtn:PF02824.17|TGS
	Included	ycaO	Ribosomal protein S12 methylthiotransferase accessory factor YcaO	COG1944	Information (J)	K09136	PF02624.12|YcaO
	Included	rimI6	Protein N-acetyltransferase, RimJ/RimL family	COG1670	Not declared (JO)	-	PF13302.2|Acetyltransf_3
	Included	h16_A2117	Ribosomal protein S18 acetylase RimI and related acetyltransferases	COG0456	Information (J)	-	PF00583.20|Acetyltransf_1
Translation	Excluded	tuf	Translation elongation factor EF-Tu, a GTPase	COG0050	Information (J)	K02358	PF00009.23|GTP_EFTU:PF03144.21|GTP_EFTU_D2:PF03143.13|GTP_EFTU_D3
	Excluded	thgL	tRNA(His) 5'-end guanylyltransferase	COG4021	Information (J)	-	PF04446.8|Thg1
RNA modification	Included	truA1	tRNA U38,U39,U40 pseudouridine synthase TruA	COG0101	Information (J)	K06173	PF01416.16|PseudoU_synth_1:PF01416.16|PseudoU_synth_1
	Included	truB	tRNA U55 pseudouridine synthase TruB, may also work on U342 of tmRNA	COG0130	Information (J)	K03177	PF08068.8|DKCLD:PF01509.14|TruB_N:PF16198.1|TruB_C_2:PF01472.16|PUA
	Excluded	rumA	tRNA/tmRNA/rRNA uracil-C5-methylase, TrmA/RlmC/RlmD family	COG2265	Information (J)	K03215	PF02475.12|Met_10:PF05958.7|tRNA_U5-meth_tr
	Included	yccW	23S rRNA G2069 N7-methylase RlmK or C1962 C5-methylase RlmI	COG1092	Information (J)	K06969	PF01472.16|PUA:PF10672.5|Methyltrans_SAM
	Included	lasT	tRNA C32,U32 (ribose-2'-O)-methylase TrmJ or a related methyltransferase	COG0565	Information (J)	K02533	PF00588.15|SpoU_methylase
	Excluded	kptA	RNA:NAD 2'-phosphotransferase, TPT1/KptA family	COG1859	Information (J)	K07559	PF01885.12|PTS_2-RNA
DNA binding	Included	asnC	DNA-binding transcriptional regulator, Lrp family	COG1522	Information (K)	K03719	PF13412.2|HTH_24:PF01037.17|AsnC_trans_reg
	Included	-	Predicted DNA-binding protein with the Helix-hairpin-helix motif	COG4277	Poorly characterised (R)	-	PF04055.17|Radical_SAM:PF12836.3|HHH_3
	Included	sinR	Transcriptional regulator, contains XRE-family HTH domain	COG1396	Information (K)	-	PF12844.3|HTH_19:PF07883.7|Cupin_2
	Excluded	ytrA	DNA-binding transcriptional regulator YhcF, GntR family	COG1725	Information (K)	-	PF00392.17|GntR
	Excluded	cmi2	Predicted transcriptional regulator	COG1777	Information (K)	-	PF01022.16|HTH_5
	Included	ybfA	DNA-binding transcriptional regulator, MarR family	COG1846	Information (K)	-	PF01047.18|MarR
	Included	ybiH	DNA-binding transcriptional regulator, AcrR family	COG1309	Information (K)	-	PF00440.19|TetR_N
Nucleic acid handling	Excluded	ruvB	Holliday junction resolvasome RuvABC, ATP-dependent DNA helicase subunit	COG2255	Information (L)	K03551	PF05496.8|RuvB_N:PF05491.9|RuvB_C
	Excluded	dinB	Nucleotidyltransferase/DNA polymerase involved in DNA repair	COG0389	Information (L)	K02346	PF00817.16|IMS:PF11798.4|IMS_HHH:PF11799.4|IMS_C
	Excluded	recQ	Superfamily II DNA helicase RecQ	COG0514	Information (L)	K03654	PF00270.25|DEAD:PF00271.27|Helicase_C:PF16124.1|RecQ_Zn_bind:PF09382.6|RQC:PF00570.19|HRDC
	Included	xerD	Site-specific recombinase XerD	COG4974	Information (L)	K03733	PF02899.13|Phage_int_SAM_1:PF00589.18|Phage_integrase
	Included	lhr	Lhr-like helicase	COG1201	Information (L)	K03724	PF00270.25|DEAD:PF00271.27|Helicase_C:PF08494.7|DEAD_assoc
	Excluded	nucS	Endonuclease NucS, RecB family	COG1637	Information (L)	K07503	PF01939.12|DUF91
	Excluded	res	Superfamily II DNA or RNA helicase	COG1061	Not declared (KL)	K10843	PF13625.2|Helicase_C_3:PF04851.11|ResIII:PF16203.1|ERCC3_RAD25_C
	Excluded	insH-11	Transposase and inactivated derivatives, IS5 family	COG3039	Not declared (X)	-	PF05598.7|DUF772:PF01609.17|DDE_Tnp_1
	Included	YSH1	RNA processing exonuclease, beta-lactamase fold, Cft2 family	COG1236	Information (J)	K07577	PF00753.23|Lactamase_B
	Excluded	top-RG	Reverse gyrase	COG1110	Information (L)	K03170	PF00270.25|DEAD:PF01751.18|Toprim:PF01131.16|Topoisom_bac
	Included	dbp	Superfamily I DNA and/or RNA helicase	COG1112	Information (L)	-	PF13245.2|AAA_19:PF13086.2|AAA_11:PF13087.2|AAA_12
Energy metabolism	Excluded	pta	BioD-like N-terminal domain of phosphotransacetylase	COG0857	Poorly characterised (R)	K06873	PF13500.2|AAA_26:PF07085.8|DRTGG
Carbon assimilation	Included	cdh	fCO dehydrogenase/acetyl-CoA synthase gamma subunit (corrinoid Fe-S protein)	COG1456	Metabolism (C)	K00197	PF04060.9|FeS:PF03599.12|CdhD
	Included	cdhD	fCO dehydrogenase/acetyl-CoA synthase delta subunit (corrinoid Fe-S protein)	COG2069	Metabolism (C)	K00194	PF03599.12|CdhD
	Excluded	iorB1	CO or xanthine dehydrogenase, Mo-binding subunit	COG1529	Metabolism (C)	K16877	PF01315.18|Ald_Xan_dh_C:PF02738.14|Ald_Xan_dh_C2
	Included	acs-3	acetyl-coenzyme_A_synthetase	COG0365	Metabolism (I)	K01895	PF16177.1|ACAS_N:PF00501.24|AMP-binding:PF13193.2|AMP-binding_C
	Included	acsA	Acyl-coenzyme A synthetase/AMP-(fatty) acid ligase	COG0365	Metabolism (I)	K01907	PF16177.1|ACAS_N:PF00501.24|AMP-binding:PF13193.2|AMP-binding_C
	Included	fpoF	fCoenzyme F420-reducing hydrogenase, beta subunit	COG1035	Metabolism (C)	-	PF04422.9|FrhB_FdhB_N:PF04432.9|FrhB_FdhB_C
Nitrogen assimilation	Included	nfnB	Nitroreductase	COG0778	Metabolism (C)	-	PF00881.20|Nitroreductase
	Included	draG	ADP-ribosylglycohydrolase	COG1397	Cellular (O)	K05521	PF03747.10|ADP_ribosyl_GH
Cofactor biosynthesis	Excluded	moaA	Molybdenum cofactor biosynthesis enzyme MoaA	COG2896	Metabolism (H)	K03639	PF04055.17|Radical_SAM:PF13353.2|Fer4_12:PF06463.9|Mob_synth_C
	Included	moaC	Molybdenum cofactor biosynthesis enzyme	COG0315	Metabolism (H)	K03637	PF01967.17|MoaC
	Excluded	batA	Mg-chelatase subunit ChlD	COG1240	Metabolism (H)	K07114	PF13519.2|VWA_2
	Excluded	thiH	2-iminoacetate synthase ThiH (tyrosine cleavage enzyme, thamine biosynthesis)	COG1060	Metabolism (H)	-	PF04055.17|Radical_SAM
	Included	ubiA	4-hydroxybenzoate polyprenyltransferase	COG0382	Metabolism (H)	-	PF01040.14|UbiA
	Included	moeA	Molybdopterin biosynthesis enzyme	COG0303	Metabolism (H)	-	PF00994.20|MoCF_biosynth
	Included	aepY	Sulfopyruvate decarboxylase, TPP-binding subunit (coenzyme M biosynthesis)	COG4032	Metabolism (H)	-	PF02776.14|TPP_enzyme_N:PF02775.17|TPP_enzyme_C
	Included	hemG	Protoporphyrinogen oxidase	COG1232	Metabolism (H)	-	PF01593.20|Amino_oxidase
	Excluded	gshB	Glutathione synthase/RimK-type ligase, ATP-grasp superfamily	COG0189	Not declared (HJ)	K05827	PF08443.7|RimK
	Excluded	cbiE	Precorrin-6B methylase 1	COG2241	Metabolism (H)	K03399	PF00590.16|TP_methylase
	Included	ybdK	Gamma-glutamyl:cysteine ligase YbdK, ATP-grasp superfamily	COG2170	Cellular (O)	-	PF04107.9|GCS2
	Included	nifB-nifX	Predicted Fe-Mo cluster-binding protein, NifX family	COG1433	Cellular (O)	-	PF02579.13|Nitro_FeMo-Co
Nucleotide metabolism	Excluded	codA	Cytosine/adenosine deaminase or related metal-dependent hydrolase	COG0402	Not declared (FR)	-	PF01979.16|Amidohydro_1
	Included	deoA	Thymidine phosphorylase	COG0213	Metabolism (F)	K00758	PF02885.13|Glycos_trans_3N:PF00591.17|Glycos_transf_3:PF07831.9|PYNP_C
	Included	purR	Adenine/guanine phosphoribosyltransferase or related PRPP-binding protein	COG0503	Metabolism (F)	K00759	PF00156.23|Pribosyltran
	Excluded	thyX	Thymidylate synthase ThyX	COG1351	Metabolism (F)	-	PF02511.11|Thy1:PF02511.11|Thy1
	Included	nudF	ADP-ribose pyrophosphatase YjhB, NUDIX family	COG1051	Metabolism (F)	-	PF00293.24|NUDIX
Amino acid metabolism	Excluded	aspA	gAspartate ammonia-lyase	COG1027	Metabolism (E)	K01744	PF00206.16|Lyase_1:PF10415.5|FumaraseC_C
	Excluded	dapB	Uncharacterized protein	COG3804	Poorly characterised (S)	K00215	PF01113.16|DapB_N
	Excluded	hsvA	N-Dimethylarginine dimethylaminohydrolase	COG1834	Metabolism (E)	K01482	PF02274.13|Amidinotransf
	Included	paaK	gPhenylacetate-coenzyme A ligase PaaK, adenylate-forming domain family	COG1541	Metabolism (H)	K01912	PF00501.24|AMP-binding:PF14535.2|AMP-binding_C_2
	Excluded	menC	L-alanine-DL-glutamate epimerase or related enzyme of enolase superfamily	COG4948	Not declared (MR)	-	PF02746.12|MR_MLE_N:PF13378.2|MR_MLE_C
	Excluded	gabT-1	4-aminobutyrate aminotransferase or related aminotransferase	COG0160	Metabolism (E)	-	PF00202.17|Aminotran_3
Redox chemistry	Excluded	ydjG	Predicted oxidoreductase (related to aryl-alcohol dehydrogenase)	COG0667	Poorly characterised (R)	-	PF00248.17|Aldo_ket_red
	Included	trxB	Thioredoxin reductase	COG0492	Cellular (O)	K00384	PF07992.10|Pyr_redox_2
	Excluded	yccK	Sulfur relay (sulfurtransferase) protein, DsrC/TusE family	COG2920	Metabolism (P)	K11179	PF04358.9|DsrC
	Excluded	hysB	Ni,Fe-hydrogenase I small subunit	COG1740	Metabolism (C)	K06282	PF01058.18|Oxidored_q6:PF14720.2|NiFe_hyd_SSU_C
	Included	NIMA	Nitroimidazol reductase NimA or a related FMN-containing flavoprotein, pyridoxamine 5'-phosphate oxidase superfamily	COG3467	Cellular (V)	K07005	PF12900.3|Pyridox_ox_2
	Excluded	fdnH	Fe-S-cluster-containing dehydrogenase component	COG0437	Metabolism (C)	-	PF12800.3|Fer4_4:PF13247.2|Fer4_11
	Excluded	ndbA	NADH dehydrogenase, FAD-containing subunit	COG1252	Metabolism (C)	K17218	PF07992.10|Pyr_redox_2
	Excluded	petA	Rieske Fe-S protein	COG0723	Metabolism (C)	K08355	PF00355.22|Rieske
	Excluded	fdhA2	Anaerobic selenocysteine-containing dehydrogenase	COG0243	Metabolism (C)	K08356	PF01568.17|Molydop_binding
	Excluded	etfA-2	Electron transfer flavoprotein, alpha subunit	COG2025	Metabolism (C)	-	PF01012.17|ETF:PF01012.17|ETF:PF00766.15|ETF_alpha
	Excluded	BisC	tetrathionate_reductase_subunit_A	COG0243	Metabolism (C)	K08357	PF00384.18|Molybdopterin:PF01568.17|Molydop_binding - some also with ISC
	Included	aor_2	aldehyde_ferredoxin_oxidoreductase	COG2414	Metabolism (C)	K03738	PF02730.11|AFOR_N:PF01314.14|AFOR_C
	Included	napF	MinD superfamily P-loop ATPase, contains an inserted ferredoxin domain	COG1149	Poorly characterised (R)	-	PF13187.2|Fer4_9
	Included	aor-3	Aldehyde:ferredoxin oxidoreductase	COG2414	Metabolism (C)	K03738	PF02730.11|AFOR_N:PF01314.14|AFOR_C
	Included	ccsA	Cytochrome c biogenesis protein CcdA	COG0785	Not declared (CO)	-	PF02683.11|DsbD
	Included	mocA	Predicted oxidoreductase of the aldo/keto reductase family	COG1453	Poorly characterised (R)	K07079	PF00248.17|Aldo_ket_red:PF13534.2|Fer4_17
Protein modification	Excluded	hypB	Ni2+-binding GTPase involved in regulation of expression and maturation of urease and hydrogenase	COG0378	Cellular (O)	K04652	PF02492.15|cobW
Lipid metabolism	Included	paaZ	Acyl-CoA reductase or other NAD-dependent aldehyde dehydrogenase	COG1012	Metabolism (C)	K00140	PF00171.18|Aldedh
	Excluded	idi	Isopentenyldiphosphate isomerase	COG1443	Metabolism (I)	K01823	PF00293.24|NUDIX
	Excluded	fadB2	3-hydroxyacyl-CoA dehydrogenase	COG1250	Metabolism (I)	-	PF02737.14|3HCDH_N:PF00725.18|3HCDH
	Excluded	acd13	acyl-CoA_dehydrogenase	COG1960	Metabolism (I)	-	PF02771.12|Acyl-CoA_dh_N:PF02770.15|Acyl-CoA_dh_M:PF00441.20|Acyl-CoA_dh_1
	Excluded	pcrB	Heptaprenylglyceryl phosphate synthase	COG1646	Metabolism (I)	-	PF01884.13|PcrB
	Excluded	ephE	Pimeloyl-ACP methyl ester carboxylesterase	COG0596	Not declared (HR)	-	PF12695.3|Abhydrolase_5
	Included	ybaW	Acyl-CoA thioesterase FadM	COG0824	Metabolism (I)	K07107	PF13279.2|4HBT_2
Sugar-related	Excluded	malE	Maltose-binding periplasmic protein MalE	COG2182	Metabolism (G)	K15770	PF13416.2|SBP_bac_8
	Excluded	galT	Galactose-1-phosphate uridylyltransferase	COG1085	Metabolism (G)	K00965	PF01087.18|GalP_UDP_transf:PF02744.13|GalP_UDP_tr_C
	Excluded	galM	Galactose mutarotase or related enzyme	COG2017	Metabolism (G)	-	PF01263.16|Aldose_epim
	Excluded	ybgG	Alpha-mannosidase	COG0383	Metabolism (G)	K01191	PF01074.18|Glyco_hydro_38:PF09261.7|Alpha-mann_mid:PF07748.9|Glyco_hydro_38C
	Excluded	ycaI	Metal-dependent hydrolase, beta-lactamase superfamily II	COG2333	Poorly characterised (R)	-	PF00753.23|Lactamase_B
	Excluded	rhgT	Lysophospholipase L1 or related esterase	COG2755	Metabolism (E)	-	PF13472.2|Lipase_GDSL_2
	Excluded	gph_2	Phosphoglycolate phosphatase, HAD superfamily	COG0546	Metabolism (C)	-	PF13419.2|HAD_2
	Excluded	engD	Aryl-phospho-beta-D-glucosidase BglC, GH1 family	COG2730	Metabolism (G)	K01179	PF00150.14|Cellulase:PF00553.15|CBM_2
	Excluded	fucI	L-fucose isomerase or related protein	COG2407	Metabolism (G)	-	PF02610.11|Arabinose_Isome
	Excluded	oxdC	Oxalate decarboxylase/archaeal phosphoglucose isomerase, cupin superfamily	COG2140	Metabolism (G)	K06859	PF06560.7|GPI
	Included	gla15	Glucoamylase (glucan-1,4-alpha-glucosidase), GH15 family	COG3387	Metabolism (G)	-	PF00723.17|Glyco_hydro_15
	Excluded	chbF	Alpha-galactosidase/6-phospho-beta-glucosidase, family 4 of glycosyl hydrolase	COG1486	Metabolism (G)	K07406	PF02056.12|Glyco_hydro_4:PF11975.4|Glyco_hydro_4C
	Excluded	wbiC	Glycosyltransferase, GT2 family	COG1216	Metabolism (G)	-	PF10111.5|Glyco_tranf_2_2
Cellular	Excluded	ftsY	Signal recognition particle GTPase	COG0552	Cellular (U)	K03110	PF02881.15|SRP54_N:PF00448.18|SRP54
	Included	ftsZ	Cell division GTPase FtsZ	COG0206	Cellular (D)	K03531	PF00091.21|Tubulin:PF12327.4|FtsZ_C
	Excluded	cheA	Chemotaxis protein histidine kinase CheA	COG0643	Not declared (NT)	K03407	PF01627.19|Hpt:PF07194.7|P2:PF02895.10|H-kinase_dim:PF02518.22|HATPase_c:PF01584.15|CheW
	Excluded	minD	Septum formation inhibitor-activating ATPase MinD	COG2894	Cellular (D)	K03609	PF01656.19|CbiA
	Excluded	kipI	Allophanate hydrolase subunit 1	COG2049	Metabolism (E)	-	PF02682.12|AHS1
	Included	traB	Pheromone shutdown protein TraB, contains GTxH motif (function unknown)	COG1916	Poorly characterised (S)	-	PF01963.13|TraB
	Excluded	pep	Prolyl oligopeptidase PreP, S9A serine peptidase family	COG1505	Metabolism (E)	K01322	PF02897.11|Peptidase_S9_N:PF00326.17|Peptidase_S9
	Included	yqxK	PHP family phosphoesterase with a Zn ribbon	COG1379	Poorly characterised (R)	-	PF13263.2|PHP_C
	Excluded	h16_A1979	Polyphosphate kinase 2, PPK2 family	COG2326	Metabolism (C)	-	PF03976.10|PPK2:PF03976.10|PPK2
	Excluded	yhcC	Histone acetyltransferase, component of the RNA polymerase elongator complex	COG1243	Not declared (KB)	K07739	PF04055.17|Radical_SAM:PF16199.1|Radical_SAM_C:PF00583.20|Acetyltransf_1
	Included	yaeL	Membrane-associated protease RseP, regulator of RpoE activity	COG0750	Not declared (OK)	-	PF02163.18|Peptidase_M50
	Excluded	aprM	Serine protease, subtilisin family	COG1404	Cellular (O)	K13275	PF00082.18|Peptidase_S8
	Included	trx-1	Negative regulator of GroEL, contains thioredoxin-like and TPR-like domains	COG3118	Cellular (O)	K03671	PF00085.16|Thioredoxin
	Excluded	pepN	Aminopeptidase N	COG0308	Metabolism (E)	K01256	PF01433.16|Peptidase_M1:PF13646.2|HEAT_2
	Excluded	crm2-2	CRISPR/Cas system-associated protein Cas10, large subunit of type III CRISPR-Cas systems, contains HD superfamily nuclease domain	COG1353	Cellular (V)	K07016	PF01966.18|HD
	Included	UspA	Nucleotide-binding universal stress protein, UspA family	COG0589	Cellular (T)	-	PF00582.22|Usp
	Included	yieN	MoxR-like ATPase	COG0714	Poorly characterised (R)	-	PF07728.10|AAA_5
	Excluded	kaiC	RecA-superfamily ATPase, KaiC/GvpD/RAD55 family	COG0467	Cellular (T)	-	PF06745.9|KaiC
	Included	pepP	Xaa-Pro aminopeptidase	COG0006	Metabolism (E)	-	PF01321.14|Creatinase_N:PF00557.20|Peptidase_M24
	Excluded	bla	CubicO group peptidase, beta-lactamase class C family	COG1680	Cellular (V)	-	PF00144.20|Beta-lactamase:PF13969.2|Pab87_oct
	Excluded	lonC	Predicted ATP-dependent Lon-type protease	COG4930	Cellular (O)	K01338	PF13337.2|Lon_2
	Excluded	alg8	Glycosyltransferase, catalytic subunit of cellulose synthase and poly-beta-1,6-N-acetylglucosamine synthase	COG1215	Cellular (N)	K00694	PF13632.2|Glyco_trans_2_3
	Excluded	cst2	CRISPR/Cas system-associated protein Cas7, RAMP superfamily	COG1857	Cellular (V)	-	PF01905.12|DevR
	Excluded	tatC	Sec-independent protein secretion pathway component TatC	COG0805	Cellular (U)	K03118	PF00902.14|TatC
Cell wall related	Excluded	ldcA	Muramoyltetrapeptide carboxypeptidase LdcA (peptidoglycan recycling)	COG1619	Cellular (M)	K01297	PF02016.11|Peptidase_S66
	Excluded	murG	UDP-N-acetylglucosamine:LPS N-acetylglucosamine transferase	COG0707	Cellular (M)	-	PF08660.7|Alg14
Transport	Excluded	appB	ABC-type dipeptide/oligopeptide/nickel transport system, permease component	COG0601	Not declared (EP)	K02033	PF00528.18|BPD_transp_1
	Excluded	b2392	Mn2+ and Fe2+ transporters of the NRAMP family	COG1914	Metabolism (P)	-	PF01566.14|Nramp
	Included	cbiM	cobalt_transport_protein_CbiM	COG0310	Metabolism (P)	K02007	PF01891.12|CbiM
	Included	cbiN	ABC-type cobalt transport system, periplasmic component	COG1930	Metabolism (P)	K02009	PF02553.11|CbiN
	Included	cbiQ	Energy-coupling factor transporter transmembrane protein EcfT	COG0619	Metabolism (H)	K16785	PF02361.12|CbiQ
	Excluded	ccmB	ABC-type transport system involved in cytochrome c biogenesis, permease component	COG2386	Cellular (O)	K02194	PF03379.9|CcmB
	Included	cdu	NhaP-type Na+/H+ or K+/H+ antiporter	COG0025	Metabolism (P)	-	PF00999.17|Na_H_Exchanger:PF02254.14|TrkA_N: PF02080.17|TrkA_C
	Included	czcD	Divalent metal cation (Fe/Co/Zn/Cd) transporter	COG0053	Metabolism (P)	-	PF01545.17|Cation_efflux:PF16916.1|ZT_dimer:PF16916.1|ZT_dimer:PF16916.1|ZT_dimer
	Excluded	dppE	ABC-type dipeptide/oligopeptide/nickel transport system, ATPase component	COG1124	Not declared (EP)	K02032	PF00005.23|ABC_tran
	Included	ehbI	Multisubunit Na+/H+ antiporter, MnhB subunit	COG2111	Metabolism (P)	K05566	PF04039.9|MnhB
	Included	entS	Sugar phosphate permease	COG2271	Metabolism (G)	K08177	PF07690.12|MFS_1
	Included	fhuD	ABC-type Fe3+-hydroxamate transport system, periplasmic component	COG0614	Metabolism (P)	K02016	PF01497.14|Peripla_BP_2
	Included	hmuU	ABC-type Fe3+-siderophore transport system, permease component	COG0609	Metabolism (P)	K02015	PF01032.14|FecCD
	Included	kefA	Small-conductance mechanosensitive channel	COG3264	Cellular (M)	-	PF00924.14|MS_channel
	Excluded	lanT	ABC-type bacteriocin/lantibiotic exporters, contain an N-terminal double-glycine peptidase domain	COG2274	Cellular (V)	-	PF00664.19|ABC_membrane:PF00005.23|ABC_tran
	Included	mdcM	Predicted permease	COG0679	Poorly characterised (R)	K07088	PF03547.14|Mem_trans:PF03547.14|Mem_trans
	Excluded	mmdB	Na+-transporting methylmalonyl-CoA/oxaloacetate decarboxylase, beta subunit	COG1883	Metabolism (C)	K01572	PF03977.9|OAD_beta
	Included	mnhC	Multisubunit Na+/H+ antiporter, MnhC subunit	COG1006	Metabolism (P)	K05560	PF00420.20|Oxidored_q2
	Excluded	modF	ABC-type molybdenum transport system, ATPase component/photorepair protein PhrA	COG1119	Metabolism (P)	K02013	PF00005.23|ABC_tran
	Excluded	msbA	ABC-type multidrug transport system, ATPase and permease component	COG1132	Cellular (V)	K06147	PF00664.19|ABC_membrane:PF00005.23|ABC_tran
	Excluded	mtlG	ABC-type glycerol-3-phosphate transport system, permease component	COG0395	Metabolism (G)	K02026	PF00528.18|BPD_transp_1
	Excluded	nixA	High-affinity nickel permease	COG3376	Metabolism (P)	K07241	PF03824.12|NicO
	Excluded	nodJ	ABC-type multidrug transport system, permease component	COG0842	Cellular (V)	K01992	PF12698.3|ABC2_membrane_3
	Excluded	nuoL	NADH:ubiquinone oxidoreductase subunit 5 (chain L)/Multisubunit Na+/H+ antiporter, MnhA subunit	COG1009	Not declared (CP)	K05565	PF00662.16|Proton_antipo_N:PF00361.16|Proton_antipo_M:PF13244.2|DUF4040:PF04039.9|MnhB
	Excluded	oppC	ABC-type dipeptide/oligopeptide/nickel transport system, permease component	COG1173	Not declared (EP)	K02034	PF00528.18|BPD_transp_1
	Excluded	oppF	ABC-type dipeptide/oligopeptide/nickel transport system, ATPase component	COG0444	Not declared (EP)	K02031	PF00005.23|ABC_tran
	Included	PotE	Amino acid transporter	COG0531	Metabolism (E)	-	PF13520.2|AA_permease_2
	Included	pyrP	Xanthine/uracil permease	COG2233	Metabolism (F)	-	PF00860.16|Xan_ur_permease
	Excluded	rhaT10	Permease of the drug/metabolite transporter (DMT) superfamily	COG0697	Not declared (GER)	-	PF00892.16|EamA:PF00892.16|EamA
	Excluded	scp2	Putative sterol carrier protein	COG3255	Metabolism (I)	-	PF02036.13|SCP2
	Excluded	ugpB	ABC-type glycerol-3-phosphate transport system, periplasmic component	COG1653	Metabolism (G)	K17315	PF01547.21|SBP_bac_1
	Excluded	VirB11	Pilus assembly protein, ATPase of CpaF family	COG4962	Not declared (UW)	K02283	PF00437.16|T2SSE
	Included	ybdG	Small-conductance mechanosensitive channel	COG0668	Cellular (M)	K16052	PF00924.14|MS_channel
	Included	ybjZ	ABC-type antimicrobial peptide transport system, permease component	COG0577	Cellular (V)	K02004	PF12704.3|MacB_PCD:PF02687.17|FtsX
	Included	yceE	Predicted arabinose efflux permease, MFS family	COG2814	Metabolism (G)	K06610	PF07690.12|MFS_1
	Included	ydiK	Predicted PurR-regulated permease PerM	COG0628	Poorly characterised (R)	-	PF01594.12|UPF0118
	Excluded	yejB	ABC-type microcin C transport system, permease component YejB	COG4174	Metabolism (Q)	K13894	PF00528.18|BPD_transp_1
	Included	yrbG	Ca2+/Na+ antiporter	COG0530	Metabolism (P)	K07301	PF01699.20|Na_Ca_ex:PF01699.20|Na_Ca_ex
Others	Included	selD	Selenophosphate synthase	COG0709	Metabolism (E)	K01008	PF00586.20|AIRS:PF02769.18|AIRS_C
	Included	phnP	Phosphoribosyl 1,2-cyclic phosphodiesterase	COG1235	Metabolism (P)	K06167	PF12706.3|Lactamase_B_2
	Included	cotM	Molecular chaperone IbpA, HSP20 family	COG0071	Cellular (O)	K13993	PF00011.17|HSP20
	Excluded	fes	Enterochelin esterase or related enzyme	COG2382	Metabolism (P)	-	PF00756.16|Esterase
	Excluded	pilF	Tfp pilus assembly protein PilF	COG3063	Not declared (NW)	-	PF13414.2|TPR_11:PF13414.2|TPR_11:PF13414.2|TPR_11:PF13414.2|TPR_11:PF13414.2|TPR_11
Unknown & uncharacterized & predicted	Included	acuB	CBS-domain-containing membrane protein	COG3448	Cellular (T)	-	PF00571.24|CBS:PF00571.24|CBS
	Excluded	aguB	Predicted amidohydrolase	COG0388	Poorly characterised (R)	-	PF00795.18|CN_hydrolase
	Excluded	aroC1	Predicted acetyltransferase, GNAT superfamily	COG3375	Poorly characterised (R)	-	PF00583.20|Acetyltransf_1
	Excluded	bchJ	Predicted hydrocarbon binding protein, contains 4VR domain	COG1719	Poorly characterised (R)	K07013	PF10702.5|DUF2507:PF02830.14|V4R
	Excluded	cda1	Predicted pyrophosphatase or phosphodiesterase, AlkP superfamily	COG1524	Poorly characterised (R)	-	PF01663.18|Phosphodiest
	Included	EC59	Uncharacterized membrane protein	COG1836	Poorly characterised (S)	-	PF01940.12|DUF92
	Included	lor/sdh	Uncharacterized conserved protein, contains Saccharopine dehydrogenase N-terminal (SDHN) domain	COG1915	Poorly characterised (S)	-	PF02274.13|Amidinotransf:PF04455.8|Saccharop_dh_N
	Excluded	mqnA	Predicted periplasmic solute-binding protein	COG1427	Poorly characterised (R)	K07081	PF02621.10|VitK2_biosynth
	Excluded	mqnD	Predicted periplasmic solute-binding protein	COG2107	Poorly characterised (R)	K07083	PF02621.10|VitK2_biosynth
	Excluded	norM2	Uncharacterized membrane protein, UPF0182 family	COG1615	Poorly characterised (S)	K09118	PF03699.9|UPF0182
	Excluded	Os10g0456500	Predicted metal-dependent hydrolase, TIM-barrel fold	COG2159	Poorly characterised (R)	K07045	PF04909.10|Amidohydro_2
	Excluded	PE_PGRS13	Uncharacterized membrane protein	COG4907	Poorly characterised (S)	-	PF09972.5|DUF2207
	Included	pmbA	Predicted Zn-dependent protease or its inactivated homolog	COG0312	Poorly characterised (R)	K03592	PF01523.12|PmbA_TldD
	Excluded	sec59	phosphatidate_cytidylyltransferase	COG0170	Cellular (O)	-	-
	Excluded	spsI	Choline kinase	COG1213	Metabolism (I)	-	PF12804.3|NTP_transf_3:PF01066.17|CDP-OH_P_transf
	Excluded	thiW	Predicted membrane protein	COG4732	Poorly characterised (S)	-	PF09512.6|ThiW
	Included	ybgI	Putative GTP cyclohydrolase 1 type 2, NIF3 family	COG0327	Metabolism (H)	-	PF01784.14|NIF3
	Excluded	yeaD	Uncharacterized conserved protein, DUF58 family, contains vWF domain	COG1721	Poorly characterised (S)	-	PF01882.14|DUF58
	Included	yfcA	Uncharacterized membrane protein YfcA	COG0730	Poorly characterised (S)	-	PF01925.15|TauE
	Included	yfhR	Fermentation-respiration switch protein FrsA, has esterase activity, DUF1100 family	COG1073	Cellular (T)	K06889	PF12695.3|Abhydrolase_5
	Included	ygiR	Radical SAM superfamily enzyme YgiQ, UPF0313 family	COG1032	Poorly characterised (R)	-	PF04055.17|Radical_SAM
	Excluded	yidH	Uncharacterized membrane protein YidH, DUF202 family	COG2149	Poorly characterised (S)	K00389	PF02656.11|DUF202
	Excluded	yidR	Uncharacterized N-terminal domain of tricorn protease	COG4946	Poorly characterised (S)	K08676	PF07676.8|PD40:PF14684.2|Tricorn_C1:PF14685.2|Tricorn_PDZ:PF03572.14|Peptidase_S41
	Included	yqhA	Uncharacterized membrane protein YqhA	COG2862	Poorly characterised (S)	-	PF03350.12|UPF0114
	Excluded	ytfP	Uncharacterized conserved protein YtfP, gamma-glutamylcyclotransferase (GGCT)/AIG2-like family	COG2105	Poorly characterised (R)	-	PF06094.8|GGACT
	Excluded	yunF	Uncharacterized conserved protein YecE, DUF72 family	COG1801	Poorly characterised (S)	-	PF01904.14|DUF72
Oxygen	Excluded	ctaD	Heme/copper-type cytochrome/quinol oxidase, subunit 1	COG0843	Metabolism (C)	K02274	PF00115.16|COX1
	Excluded	sodC	Cu/Zn superoxide dismutase	COG2032	Metabolism (P)	K04565	PF00080.16|Sod_Cu
	Excluded	bcpB	Peroxiredoxin	COG1225	Cellular (O)	-	PF00578.17|AhpC-TSA
	Excluded	hpaB	Aromatic ring hydroxylase	COG2368	Metabolism (Q)	-	PF11794.4|HpaB_N:PF03241.9|HpaB
	Included	rr-2	Rubrerythrin	COG1633	Metabolism (P)	-	PF02915.13|Rubrerythrin
*means whether it is included in the analysis in this paper
