# Supplementary material for: The GC Content as a Main Factor Shaping the Amino Acid Usage During Bacterial Evolution Process
Source: Front Microbiol. 2018 Dec 7;9:2948. doi: 10.3389/fmicb.2018.02948 (PMC6292993; doi:10.3389/fmicb.2018.02948)
Supplement: TABLE S3 — Lists of organisms and corresponding numbers of orthologous proteins to MmarS2. [file Data_Sheet_3.xls]

## Sheet: Table S1
Table S3 Lists of organisms and corresponding numbers of orthologous proteins to MmarS2
Organism	Orthologous protein number
Listeria welshimeri serovar 6b SLCC5334 uid61605	11
Campylobacter concisus 13826 uid58667	20
Acinetobacter baumannii AB307 0294 uid59271	21
Archaeoglobus fulgidus DSM 4304 uid57717	21
Bacillus coagulans 2 6 uid68053	21
Bacillus subtilis spizizenii TU B 10 uid73967	21
Bartonella clarridgeiae 73 uid62131	21
Bifidobacterium longum NCC2705 uid57939	21
Borrelia burgdorferi ZS7 uid59429	21
Brachyspira hyodysenteriae WA1 uid59291	21
Brucella melitensis biovar Abortus 2308 uid62937	21
Brucella ovis ATCC 25840 uid58113	21
Brucella pinnipedialis B2 94 uid71131	21
Buchnera aphidicola 5A Acyrthosiphon pisum uid59285	21
Buchnera aphidicola Bp Baizongia pistaciae uid57827	21
Buchnera aphidicola Tuc7 Acyrthosiphon pisum uid59283	21
Butyrivibrio proteoclasticus B316 uid51489	21
Coxiella burnetii CbuG Q212 uid58893	21
Coxiella burnetii CbuK Q154 uid58895	21
Deinococcus deserti VCD115 uid58615	21
Dinoroseobacter shibae DFL 12 uid58707	21
Ehrlichia ruminantium Welgevonden uid58013	21
Glaciecola nitratireducens FR1064 uid73759	21
Haloarcula hispanica ATCC 33960 uid72475	21
Haloarcula marismortui ATCC 43049 uid57719	21
Halobacterium salinarum R1 uid61571	21
Legionella pneumophila Lens uid58209	21
Leuconostoc gasicomitatum LMG 18811 uid50385	21
Listeria monocytogenes 08 5923 uid43727	21
Listeria monocytogenes uid43671	21
Macrococcus caseolyticus JCSC5402 uid59003	21
Mycobacterium bovis BCG Pasteur 1173P2 uid58781	21
Mycobacterium bovis BCG Tokyo 172 uid59281	21
Mycobacterium JDM601 uid67369	21
Nitrosomonas europaea ATCC 19718 uid57647	21
Nostoc PCC 7120 uid57803	21
Oceanobacillus iheyensis HTE831 uid57867	21
Propionibacterium freudenreichii shermanii CIRM BIA1 uid49535	21
Rhizobium etli CIAT 652 uid59115	21
Rickettsia japonica YH uid73963	21
Rickettsia massiliae MTU5 uid58801	21
Rickettsia typhi Wilmington uid58063	21
Roseobacter litoralis Och 149 uid54719	21
Ruegeria pomeroyi DSS 3 uid57863	21
Staphylococcus aureus USA300 TCH1516 uid58925	21
Streptococcus agalactiae 2603V R uid57943	21
Streptococcus pyogenes MGAS315 uid57911	21
Streptococcus pyogenes NZ131 uid59035	21
Tropheryma whipplei TW08 27 uid57961	21
Wigglesworthia glossinidia endosymbiont of Glossina brevipalpis uid57853	21
Wolbachia wRi uid59371	21
Acidaminococcus intestini RyC MR95 uid74445	22
Arthrobacter aurescens TC1 uid58109	22
Bartonella henselae Houston 1 uid57745	22
Bartonella tribocorum CIP 105476 uid59129	22
Bdellovibrio bacteriovorus HD100 uid61595	22
Bifidobacterium animalis lactis AD011 uid58911	22
Bifidobacterium bifidum PRL2010 uid59883	22
Bifidobacterium dentium Bd1 uid43091	22
Blattabacterium Blattella germanica Bge uid41533	22
Bordetella avium 197N uid61563	22
Brucella abortus bv 1 9 941 uid58019	22
Brucella microti CCM 4915 uid59319	22
Buchnera aphidicola APS Acyrthosiphon pisum uid57805	22
Candidatus Blochmannia floridanus uid57999	22
Coxiella burnetii RSA 493 uid57631	22
Dichelobacter nodosus VCS1703A uid57643	22
Erysipelothrix rhusiopathiae Fujisawa uid68021	22
Gardnerella vaginalis ATCC 14019 uid55487	22
Helicobacter pylori B38 uid59415	22
Laribacter hongkongensis HLHK9 uid59265	22
Legionella pneumophila Corby uid58733	22
Methanothermobacter marburgensis Marburg uid51637	22
Mycobacterium africanum GM041182 uid68839	22
Mycobacterium bovis AF2122 97 uid57695	22
Mycobacterium canettii uid70731	22
Mycobacterium tuberculosis CDC1551 uid57775	22
Mycobacterium tuberculosis H37Ra uid58853	22
Mycobacterium tuberculosis H37Rv uid57777	22
Mycobacterium ulcerans Agy99 uid62939	22
Porphyromonas gingivalis TDC60 uid67407	22
Porphyromonas gingivalis W83 uid57641	22
Prochlorococcus marinus MIT 9313 uid57773	22
Rhizobium NGR234 uid59081	22
Rhodococcus equi 103S uid60171	22
Rickettsia felis URRWXCal2 uid58331	22
Sinorhizobium meliloti 1021 uid57603	22
Sorangium cellulosum So ce 56 uid61629	22
Streptococcus mitis B6 uid46097	22
Streptococcus pyogenes MGAS8232 uid57871	22
Streptococcus uberis 0140J uid57959	22
Teredinibacter turnerae T7901 uid59267	22
Thermococcus gammatolerans EJ3 uid59389	22
Thermosipho africanus TCF52B uid59095	22
Xanthomonas oryzae KACC10331 uid58155	22
Xanthomonas oryzae PXO99A uid59131	22
Acidobacterium capsulatum ATCC 51196 uid59127	23
Acinetobacter baumannii AB0057 uid59083	23
Blattabacterium Periplaneta americana BPLAN uid41287	23
Brucella suis 1330 uid57927	23
Candidatus Arthromitus SFB rat Yit uid73425	23
Candidatus Hamiltonella defensa 5AT Acyrthosiphon pisum uid59289	23
Carnobacterium 17 4 uid65789	23
Clostridiales genomosp BVAB3 UPII9 5 uid46219	23
Corynebacterium aurimucosum ATCC 700975 uid59409	23
Corynebacterium diphtheriae NCTC 13129 uid57691	23
Corynebacterium jeikeium K411 uid58399	23
Corynebacterium pseudotuberculosis FRC41 uid50585	23
Corynebacterium variabile DSM 44702 uid62003	23
Coxiella burnetii Dugway 5J108 111 uid58629	23
Coxiella burnetii RSA 331 uid58637	23
Dictyoglomus thermophilum H 6 12 uid59439	23
Helicobacter acinonychis Sheeba uid58685	23
Helicobacter pylori B8 uid49873	23
Helicobacter pylori J99 uid57789	23
Lactobacillus crispatus ST1 uid48359	23
Lactobacillus delbrueckii bulgaricus ATCC 11842 uid58647	23
Leptospira biflexa serovar Patoc Patoc 1 Paris uid58993	23
Leuconostoc citreum KM20 uid58481	23
Methanocella paludicola SANAE uid42887	23
Microcystis aeruginosa NIES 843 uid59101	23
Mobiluncus curtisii ATCC 43063 uid49695	23
Mycobacterium avium paratuberculosis K 10 uid57699	23
Neisseria meningitidis Z2491 uid57819	23
Nocardia farcinica IFM 10152 uid58203	23
Paenibacillus mucilaginosus KNP414 uid68311	23
Pseudomonas entomophila L48 uid58639	23
Pseudomonas fluorescens Pf 5 uid57937	23
Pseudomonas syringae tomato DC3000 uid57967	23
Rhodobacter capsulatus SB 1003 uid47509	23
Rhodococcus jostii RHA1 uid58325	23
Shewanella violacea DSS12 uid47085	23
Staphylococcus aureus MRSA252 uid57839	23
Streptococcus agalactiae A909 uid57935	23
Streptococcus pneumoniae 670 6B uid52533	23
Streptococcus pneumoniae G54 uid59167	23
Streptococcus suis BM407 uid59321	23
Streptococcus suis P1 7 uid32235	23
Streptococcus suis SC84 uid59323	23
Synechococcus CC9311 uid58123	23
Vibrio fischeri MJ11 uid58907	23
Waddlia chondrophila WSU 86 1044 uid49531	23
Xanthomonas axonopodis citrumelo F1 uid73179	23
Xanthomonas campestris vesicatoria 85 10 uid58321	23
Xylella fastidiosa Temecula1 uid57869	23
Acholeplasma laidlawii PG 8A uid58901	24
Aerococcus urinae ACS 120 V Col10a uid64757	24
Anaplasma marginale Florida uid58577	24
Anaplasma marginale Maries uid57629	24
Bacillus amyloliquefaciens DSM 7 uid53535	24
Bacillus cereus biovar anthracis CI uid50615	24
Bacillus clausii KSM K16 uid58237	24
Bacillus halodurans C 125 uid57791	24
Burkholderia cenocepacia J2315 uid57953	24
Collimonas fungivorans Ter331 uid70793	24
Corynebacterium ulcerans BR AD22 uid68291	24
Cupriavidus taiwanensis LMG 19424 uid61615	24
Dehalococcoides VS uid42393	24
Edwardsiella tarda EIB202 uid41819	24
Gemmatimonas aurantiaca T 27 uid58813	24
Haemophilus ducreyi 35000HP uid57625	24
Haemophilus influenzae Rd KW20 uid57771	24
Haemophilus somnus 129PT uid57929	24
Hahella chejuensis KCTC 2396 uid58483	24
Helicobacter pylori P12 uid59327	24
Herminiimonas arsenicoxydans uid58291	24
Lactococcus lactis cremoris MG1363 uid58837	24
Lactococcus lactis Il1403 uid57671	24
Lawsonia intracellularis PHE MN1 00 uid61575	24
Legionella pneumophila 2300 99 Alcoy uid48801	24
Leptospira borgpetersenii serovar Hardjo bovis JB197 uid58509	24
Methanobrevibacter ruminantium M1 uid45857	24
Methanosphaera stadtmanae DSM 3091 uid58407	24
Microlunatus phosphovorus NM 1 uid68055	24
Mycobacterium avium 104 uid57693	24
Mycobacterium leprae Br4923 uid59293	24
Mycobacterium marinum M uid59423	24
Oligotropha carboxidovorans OM5 uid72795	24
Prevotella ruminicola 23 uid47507	24
Psychrobacter arcticus 273 4 uid58021	24
Ralstonia solanacearum GMI1000 uid57593	24
Ramlibacter tataouinensis TTB310 uid68279	24
Rhizobium leguminosarum bv viciae 3841 uid57955	24
Sphingobium japonicum UT26S uid47077	24
Sphingobium SYK 6 uid73353	24
Staphylococcus aureus Mu3 uid58817	24
Staphylococcus aureus Mu50 uid57835	24
Staphylococcus aureus MW2 uid57903	24
Staphylococcus aureus N315 uid57837	24
Staphylococcus haemolyticus JCSC1435 uid62919	24
Stenotrophomonas maltophilia K279a uid61647	24
Streptococcus pasteurianus ATCC 43144 uid68019	24
Streptococcus salivarius JIM8780 uid70481	24
Streptococcus thermophilus CNRZ1066 uid58221	24
Streptococcus thermophilus LMG 18311 uid58219	24
Synechococcus JA 2 3B a 2 13 uid58537	24
Synechococcus WH 8102 uid61581	24
Thermoproteus tenax Kra 1 uid74443	24
Xanthomonas albilineans GPE PC73 uid43163	24
Yersinia enterocolitica 8081 uid57741	24
Achromobacter xylosoxidans A8 uid59899	25
Actinobacillus pleuropneumoniae serovar 3 JL03 uid58891	25
Actinobacillus pleuropneumoniae serovar 5b L20 uid58789	25
Arcobacter butzleri RM4018 uid58557	25
Bacillus licheniformis ATCC 14580 uid58199	25
Bordetella pertussis Tohama I uid57617	25
Burkholderia mallei NCTC 10247 uid58385	25
Burkholderia pseudomallei MSHR346 uid29855	25
Candidatus Pelagibacter ubique HTCC1062 uid58401	25
Candidatus Vesicomyosocius okutanii HA uid59427	25
Cellvibrio japonicus Ueda107 uid59139	25
Clavibacter michiganensis NCPPB 382 uid61625	25
Clostridium novyi NT uid58643	25
Colwellia psychrerythraea 34H uid57855	25
Corynebacterium glutamicum ATCC 13032 uid61611	25
Corynebacterium resistens DSM 45100 uid50555	25
Cupriavidus necator N 1 uid68689	25
Deferribacter desulfuricans SSM1 uid46653	25
Dehalococcoides ethenogenes 195 uid57763	25
Desulfobacterium autotrophicum HRM2 uid59061	25
Francisella tularensis holarctica FTNF002 00 uid58999	25
Francisella tularensis mediasiatica FSC147 uid58939	25
Francisella tularensis WY96 3418 uid58811	25
gamma proteobacterium HdN1 uid51635	25
Helicobacter felis ATCC 49179 uid61409	25
Lactobacillus rhamnosus Lc 705 uid59315	25
Legionella pneumophila Philadelphia 1 uid57609	25
Leptospira biflexa serovar Patoc Patoc 1 Ames uid58511	25
Leptospira interrogans serovar Copenhageni Fiocruz L1 130 uid58065	25
Listeria monocytogenes HCC23 uid59203	25
Listeria seeligeri serovar 1 2b SLCC3954 uid46215	25
Mycobacterium leprae TN uid57697	25
Neisseria meningitidis 053442 uid58587	25
Oscillibacter valericigenes uid73895	25
Prochlorococcus marinus MIT 9303 uid58305	25
Pseudoalteromonas haloplanktis TAC125 uid58431	25
Pseudoalteromonas SM9913 uid61247	25
Pseudomonas aeruginosa PA7 uid58627	25
Pseudomonas putida KT2440 uid57843	25
Pseudomonas stutzeri ATCC 17588 LMG 11199 uid68749	25
Ralstonia eutropha H16 uid62925	25
Ralstonia solanacearum CFBP2957 uid50545	25
Rhodobacter sphaeroides 2 4 1 uid57653	25
Staphylococcus aureus Newman uid58839	25
Staphylococcus aureus RF122 uid57661	25
Streptococcus gordonii Challis substr CH1 uid57667	25
Streptococcus pneumoniae 70585 uid59125	25
Streptococcus pneumoniae ATCC 700669 uid59287	25
Streptococcus pneumoniae Hungary19A 6 uid59117	25
Streptococcus pneumoniae JJA uid59121	25
Streptococcus pneumoniae P1031 uid59123	25
Streptococcus pneumoniae Taiwan19F 14 uid59119	25
Streptococcus pneumoniae TCH8431 19A uid49735	25
Sulfurovum NBC37 1 uid58863	25
Synechococcus JA 3 3Ab uid58535	25
Thermodesulfovibrio yellowstonii DSM 11347 uid59257	25
Vibrio cholerae M66 2 uid59355	25
Vibrio cholerae O395 uid58425	25
Xanthomonas axonopodis citri 306 uid57889	25
Yersinia pestis Angola uid58485	25
Yersinia pestis biovar Microtus 91001 uid58037	25
Yersinia pestis CO92 uid57621	25
Yersinia pestis Z176003 uid47317	25
Yersinia pseudotuberculosis IP 31758 uid58487	25
Acinetobacter baumannii AYE uid61637	26
Agrobacterium H13 3 uid63403	26
Alcanivorax borkumensis SK2 uid58169	26
Arthrobacter arilaitensis Re117 uid53509	26
Bacillus amyloliquefaciens FZB42 uid58271	26
Bacillus licheniformis ATCC 14580 uid58097	26
Bacillus pumilus SAFR 032 uid59017	26
Bacillus subtilis 168 uid57675	26
Bacillus subtilis spizizenii W23 uid51879	26
Bordetella bronchiseptica RB50 uid57613	26
Bordetella parapertussis 12822 uid57615	26
Bradyrhizobium japonicum USDA 110 uid57599	26
Burkholderia mallei SAVP1 uid58387	26
Campylobacter hominis ATCC BAA 381 uid58981	26
Campylobacter jejuni 81116 uid58771	26
Campylobacter jejuni doylei 269 97 uid58671	26
Chlorobium tepidum TLS uid57897	26
Clostridium acetobutylicum DSM 1731 uid68293	26
Clostridium difficile 630 uid57679	26
Clostridium difficile CD196 uid41017	26
Clostridium difficile R20291 uid40921	26
Clostridium kluyveri DSM 555 uid58885	26
Clostridium sticklandii DSM 519 uid59585	26
Cupriavidus metallidurans CH34 uid57815	26
Desulfovibrio vulgaris Hildenborough uid57645	26
Erwinia billingiae Eb661 uid50547	26
Flavobacterium branchiophilum FL 15 uid73421	26
Francisella tularensis holarctica OSU18 uid58687	26
Frankia alni ACN14a uid58695	26
Geobacter sulfurreducens PCA uid57743	26
Gluconacetobacter diazotrophicus PAl 5 uid61587	26
Haemophilus influenzae 86 028NP uid58093	26
Haemophilus parasuis SH0165 uid59273	26
Halomonas elongata DSM 2581 uid52781	26
Herbaspirillum seropedicae SmR1 uid50427	26
Idiomarina loihiensis L2TR uid58087	26
Lactobacillus reuteri SD2112 uid55357	26
Lactobacillus rhamnosus GG uid59313	26
Lactococcus lactis KF147 uid42831	26
Leifsonia xyli CTCB07 uid57759	26
Methylobacterium extorquens AM1 uid57605	26
Methylobacterium extorquens DM4 uid61617	26
Moraxella catarrhalis RH4 uid48809	26
Neisseria lactamica uid60851	26
Neisseria meningitidis alpha14 uid61649	26
Neisseria meningitidis FAM18 uid57825	26
Neisseria meningitidis MC58 uid57817	26
Nitratiruptor SB155 2 uid58861	26
Pasteurella multocida Pm70 uid57627	26
Pelobacter carbinolicus DSM 2380 uid58241	26
Prochlorococcus marinus pastoris CCMP1986 uid57761	26
Pseudomonas aeruginosa LESB58 uid59275	26
Pseudomonas aeruginosa PAO1 uid57945	26
Pseudomonas aeruginosa UCBPP PA14 uid57977	26
Rhodococcus opacus B4 uid13791	26
Rhodopirellula baltica SH 1 uid61589	26
Rothia dentocariosa ATCC 17931 uid49331	26
Saccharopolyspora erythraea NRRL 2338 uid62947	26
Shewanella oneidensis MR 1 uid57949	26
Staphylococcus epidermidis RP62A uid57663	26
Streptococcus gallolyticus ATCC BAA 2069 uid63617	26
Streptococcus sanguinis SK36 uid58381	26
Synechococcus WH 7803 uid61607	26
Tetragenococcus halophilus uid74441	26
Xanthomonas campestris ATCC 33913 uid57887	26
Yersinia pestis KIM 10 uid57875	26
Yersinia pseudotuberculosis IP 32953 uid58157	26
Zobellia galactanivorans uid70621	26
Acinetobacter ADP1 uid61597	27
Acinetobacter baumannii SDF uid61601	27
Aeromonas hydrophila ATCC 7966 uid58617	27
Agrobacterium tumefaciens C58 uid57865	27
Agrobacterium vitis S4 uid58249	27
Anoxybacillus flavithermus WK1 uid59135	27
Bacillus thuringiensis Al Hakam uid58795	27
Bacillus thuringiensis BMB171 uid49135	27
Bordetella petrii DSM 12804 uid61631	27
Burkholderia mallei ATCC 23344 uid57725	27
Burkholderia mallei NCTC 10229 uid58383	27
Burkholderia pseudomallei K96243 uid57733	27
Campylobacter curvus 525 92 uid58669	27
Campylobacter fetus 82 40 uid58545	27
Campylobacter jejuni 81 176 uid58503	27
Campylobacter jejuni RM1221 uid57899	27
Campylobacter lari RM2100 uid58115	27
Chromobacterium violaceum ATCC 12472 uid58001	27
Citrobacter rodentium ICC168 uid43089	27
Clostridium acetobutylicum ATCC 824 uid57677	27
Dehalococcoides CBDB1 uid58413	27
Erwinia amylovora CFBP1430 uid46839	27
Erwinia pyrifoliae Ep1 96 uid40659	27
Erwinia tasmaniensis Et1 99 uid59029	27
Francisella tularensis FSC198 uid58693	27
Francisella tularensis SCHU S4 uid57589	27
Gramella forsetii KT0803 uid58881	27
Janthinobacterium Marseille uid58603	27
Klebsiella pneumoniae 342 uid59145	27
Lactobacillus casei BL23 uid59237	27
Legionella longbeachae NSW150 uid46099	27
Leptospira interrogans serovar Lai 56601 uid57881	27
Listeria monocytogenes serotype 4b F2365 uid57689	27
Methylococcus capsulatus Bath uid57607	27
Myxococcus xanthus DK 1622 uid58003	27
Nautilia profundicola AmH uid59345	27
Pantoea ananatis LMG 20103 uid46807	27
Pantoea vagans C9 1 uid49871	27
Prochlorococcus marinus MIT 9211 uid58309	27
Prochlorococcus marinus MIT 9301 uid58437	27
Prochlorococcus marinus NATL1A uid58423	27
Rhodospirillum centenum SW uid58805	27
Staphylococcus aureus COL uid57797	27
Staphylococcus aureus ED98 uid41455	27
Staphylococcus carnosus TM300 uid59401	27
Streptococcus parasanguinis ATCC 15912 uid49313	27
Streptococcus pneumoniae D39 uid58581	27
Streptomyces avermitilis MA 4680 uid57739	27
Synechococcus RCC307 uid61609	27
Vibrio fischeri ES114 uid58163	27
Xenorhabdus bovienii SS 2004 uid46345	27
Xenorhabdus nematophila ATCC 19061 uid49133	27
Acidithiobacillus ferrooxidans ATCC 23270 uid57649	28
Aromatoleum aromaticum EbN1 uid58231	28
Azoarcus BH72 uid61603	28
Brevibacillus brevis NBRC 100599 uid59175	28
Campylobacter jejuni NCTC 11168 uid57587	28
Candidatus Nitrospira defluvii uid51175	28
Clostridium botulinum A ATCC 19397 uid58927	28
Clostridium botulinum F Langeland uid58929	28
Clostridium ljungdahlii DSM 13528 uid50583	28
Cyanothece ATCC 51142 uid59013	28
Escherichia coli O127 H6 E2348 69 uid59343	28
Francisella novicida U112 uid58499	28
Geobacter bemidjiensis Bem uid58749	28
Helicobacter hepaticus ATCC 51449 uid57737	28
Helicobacter mustelae 12198 uid46647	28
Methanococcus maripaludis S2 uid58035	28
Mycobacterium smegmatis MC2 155 uid57701	28
Persephonella marina EX H1 uid58119	28
Prochlorococcus marinus AS9601 uid58307	28
Prochlorococcus marinus MIT 9215 uid58819	28
Prochlorococcus marinus MIT 9515 uid58313	28
Pseudomonas stutzeri A1501 uid58641	28
Pseudomonas syringae phaseolicola 1448A uid58099	28
Ralstonia solanacearum PSI07 uid50539	28
Rhodococcus erythropolis PR4 uid59019	28
Salinibacter ruber DSM 13855 uid58513	28
Streptococcus pneumoniae CGSP14 uid59181	28
Sulfurihydrogenibium azorense Az Fu1 uid58121	28
Synechocystis PCC 6803 uid57659	28
Thermomicrobium roseum DSM 5159 uid59341	28
Thermus scotoductus SA 01 uid62273	28
Anaerolinea thermophila UNI 1 uid62245	29
Aquifex aeolicus VF5 uid57765	29
Azotobacter vinelandii DJ uid57597	29
Burkholderia pseudomallei 668 uid58389	29
Carboxydothermus hydrogenoformans Z 2901 uid57821	29
Clostridium botulinum Ba4 657 uid59173	29
Escherichia coli BW2952 uid59391	29
Escherichia coli E24377A uid58395	29
Escherichia coli HS uid58393	29
Escherichia coli K 12 substr DH10B uid58979	29
Escherichia coli K 12 substr MG1655 uid57779	29
Escherichia coli O157 H7 EC4115 uid59091	29
Escherichia coli O55 H7 CB9615 uid46655	29
Kocuria rhizophila DC2201 uid59099	29
Mannheimia succiniciproducens MBEL55E uid58197	29
Methylovorus MP688 uid60723	29
Shigella boydii CDC 3083 94 uid58415	29
Staphylococcus aureus USA300 FPR3757 uid58555	29
Synechococcus elongatus PCC 6301 uid58235	29
Acaryochloris marina MBIC11017 uid58167	30
Acidiphilium multivorum AIU301 uid63345	30
Bacillus cereus 03BB102 uid59299	30
Bacillus cereus AH187 uid58753	30
Bacillus cereus B4264 uid58757	30
Bradyrhizobium ORS 278 uid58941	30
Burkholderia pseudomallei 1106a uid58515	30
Clostridium botulinum B Eklund 17B uid59159	30
Desulfovibrio magneticus RS 1 uid59309	30
Dickeya dadantii 3937 uid52537	30
Escherichia coli 55989 uid59383	30
Escherichia coli B REL606 uid58803	30
Escherichia coli CFT073 uid57915	30
Escherichia coli ED1a uid59379	30
Escherichia coli IAI1 uid59377	30
Escherichia coli IAI39 uid59381	30
Escherichia coli O103 H2 12009 uid41013	30
Escherichia coli O111 H 11128 uid41023	30
Escherichia coli O157 H7 TW14359 uid59235	30
Escherichia coli O26 H11 11368 uid41021	30
Escherichia coli S88 uid62979	30
Escherichia coli SMS 3 5 uid58919	30
Escherichia coli UMN026 uid62981	30
Escherichia fergusonii ATCC 35469 uid59375	30
Hydrogenobacter thermophilus TK 6 uid45927	30
Pectobacterium atrosepticum SCRI1043 uid57957	30
Photorhabdus asymbiotica ATCC 43949 uid59243	30
Proteus mirabilis HI4320 uid61599	30
Rhodopseudomonas palustris CGA009 uid62901	30
Salmonella bongori NCTC 12419 uid70155	30
Salmonella enterica serovar Agona SL483 uid59431	30
Salmonella enterica serovar Dublin CT 02021853 uid58917	30
Salmonella enterica serovar Gallinarum 287 91 uid59249	30
Salmonella enterica serovar Heidelberg SL476 uid58973	30
Salmonella enterica serovar Newport SL254 uid58831	30
Salmonella enterica serovar Paratyphi A ATCC 9150 uid58201	30
Salmonella enterica serovar Paratyphi C RKS4594 uid59063	30
Salmonella enterica serovar Schwarzengrund CVM19633 uid58915	30
Salmonella enterica serovar Typhi CT18 uid57793	30
Salmonella enterica serovar Typhi Ty2 uid57973	30
Shigella flexneri 2a 2457T uid57991	30
Shigella flexneri 2a 301 uid62907	30
Shigella flexneri 5 8401 uid58583	30
Streptococcus pneumoniae R6 uid57859	30
Bacillus cereus ATCC 10987 uid57673	31
Bacillus cereus G9842 uid58759	31
Bacillus megaterium DSM319 uid48371	31
Bacillus pseudofirmus OF4 uid45847	31
Clostridium perfringens ATCC 13124 uid57901	31
Cronobacter turicensis z3032 uid40821	31
Cytophaga hutchinsonii ATCC 33406 uid57651	31
Escherichia coli APEC O1 uid58623	31
Escherichia coli O157 H7 EDL933 uid57831	31
Hyphomicrobium MC1 uid68453	31
Lactobacillus salivarius UCC118 uid58233	31
Leptospira borgpetersenii serovar Hardjo bovis L550 uid58507	31
Prochlorococcus marinus CCMP1375 uid57995	31
Salmonella enterica serovar Choleraesuis SC B67 uid58017	31
Salmonella enterica serovar Enteritidis P125109 uid59247	31
Salmonella enterica serovar Typhimurium LT2 uid57799	31
Shigella boydii Sb227 uid58215	31
Shigella dysenteriae Sd197 uid58213	31
Shigella sonnei Ss046 uid58217	31
Bacillus anthracis Ames uid57909	32
Bacillus anthracis CDC 684 uid59303	32
Bacillus anthracis Ames Ancestor uid58083	32
Bacillus cereus AH820 uid58751	32
Bacillus megaterium QM B1551 uid15862	32
Burkholderia pseudomallei 1710b uid58391	32
Clostridium botulinum E3 Alaska E43 uid59157	32
Escherichia coli UTI89 uid58541	32
Klebsiella pneumoniae MGH 78578 uid57619	32
Klebsiella pneumoniae NTUH K2044 uid59073	32
Synechococcus PCC 7002 uid59137	32
Bacillus anthracis A0248 uid59385	33
Haloquadratum walsbyi DSM 16790 uid58673	33
Methanosarcina acetivorans C2A uid57879	33
Bradyrhizobium BTAi1 uid58505	34
Burkholderia multivorans ATCC 17616 uid58909	34
Clostridium botulinum A2 Kyoto uid59229	34
Heliobacterium modesticaldum Ice1 uid58279	34
Methanosaeta concilii GP6 uid66207	34
Clostridium botulinum A3 Loch Maree uid59149	35
Aeromonas salmonicida A449 uid58631	36
Azospirillum B510 uid46085	36
Bacillus cereus Q1 uid58529	36
Bacillus thuringiensis serovar konkukian 97 27 uid58089	36
Clostridium botulinum B1 Okra uid59147	36
Bacillus cereus E33L uid58103	37
Salinibacter ruber M8 uid47323	37
Sulfobacillus acidophilus TPY uid68841	37
Methylacidiphilum infernorum V4 uid59161	40
Amycolatopsis mediterranei U32 uid50565	42
