# Supplementary material for: The GC Content as a Main Factor Shaping the Amino Acid Usage During Bacterial Evolution Process
Source: Front Microbiol. 2018 Dec 7;9:2948. doi: 10.3389/fmicb.2018.02948 (PMC6292993; doi:10.3389/fmicb.2018.02948)
Supplement: TABLE S4 — Principal component regression between evolutionary rates and amino acid compositions for MmarS2 proteins. [file Data_Sheet_4.xlsx]

## Sheet: Sheet1
Table S4 Principal component regression between evolutionary rates and amino acid compositions for MmarS2 proteins
Group(LUCA or non-LUCA)	Gene name
		CV (GC)	CV (Ka)	R²(PCR)*	R (GC vs the first principal component)	P(GC vs the first principal component)
non-LUCA	alr	0.27642	0.203539	0.583261	-0.91927	4.3724e-108
non-LUCA	apt	0.250614	0.221832	0.725335	0.827059	1.92805e-54
non-LUCA	argB	0.243112	0.231354	0.69436	-0.871896	8.91368e-71
non-LUCA	argC	0.246669	0.230763	0.494396	-0.922036	2.75913e-132
non-LUCA	argF	0.271395	0.157979	0.487255	0.892272	4.49299e-73
non-LUCA	argG	0.231447	0.285484	0.866135	0.506474	6.86862e-18
non-LUCA	argH	0.277626	0.140053	0.650855	-0.909078	9.27229e-95
non-LUCA	argJ	0.231514	0.152523	0.741205	0.923849	2.01169e-105
non-LUCA	aroA	0.283075	0.565047	0.655505	0.904389	4.8294e-97
non-LUCA	aroC	0.251242	0.548149	0.703806	0.911123	1.81353e-102
non-LUCA	aroE	0.295809	0.219189	0.69735	0.930087	1.88299e-146
non-LUCA	asd	0.256709	0.204605	0.287074	-0.844941	4.49353e-57
non-LUCA	atpA	0.223845	0.184211	0.849429	-0.779209	4.24116e-45
non-LUCA	atpD	0.20775	0.113045	0.698619	-0.254324	0.000209766
non-LUCA	bioB	0.257146	0.181642	0.772477	0.903169	1.371e-84
non-LUCA	bioD	0.296533	0.202928	0.686722	-0.950384	1.22046e-119
non-LUCA	carA	0.253183	0.106284	0.553026	-0.893827	3.01964e-93
non-LUCA	carB	0.23926	0.145738	0.599162	0.875648	7.38923e-122
non-LUCA	cysS	0.268038	0.153016	0.700234	0.934693	9.28151e-218
non-LUCA	dapA	0.254858	0.220609	0.608255	-0.918182	5.19534e-115
non-LUCA	dapF	0.262862	0.245218	0.66785	0.935021	3.31754e-182
non-LUCA	eno	0.221938	0.1239	0.540124	0.755243	1.88339e-88
non-LUCA	gatA	0.255546	0.148682	0.645897	-0.901156	1.18609e-139
non-LUCA	glgA	0.234792	0.116875	0.68649	-0.900822	2.13456e-70
non-LUCA	glmS	0.248002	0.160992	0.704666	-0.90248	5.83674e-103
non-LUCA	guaA	0.244812	0.210919	0.264866	-0.87699	1.16338e-108
non-LUCA	guaB	0.223797	0.123068	0.777587	0.811282	2.22653e-61
non-LUCA	hemB	0.235557	0.290457	0.201266	0.901166	6.47252e-87
non-LUCA	hemC	0.256619	0.127791	0.780439	-0.931412	1.19163e-159
non-LUCA	hemL	0.229868	0.201379	0.709795	-0.912967	3.09713e-78
non-LUCA	hisB	0.219698	0.0977923	0.459971	-0.856629	2.28414e-72
non-LUCA	hisC	0.28908	0.153041	0.736223	-0.94128	1.26259e-98
non-LUCA	hisD	0.242481	0.159291	0.773521	-0.924387	2.29374e-144
non-LUCA	hisF	0.228922	0.575126	0.653467	0.835732	1.70102e-60
non-LUCA	hisG	0.251454	0.152578	0.627905	-0.907347	3.7182e-134
non-LUCA	hisH	0.241257	0.567642	0.622123	0.930614	1.0121e-155
non-LUCA	hisS	0.265154	0.131343	0.750923	-0.905579	2.08019e-179
non-LUCA	ilvD	0.227881	0.148402	0.742084	0.87353	1.72146e-74
non-LUCA	ilvH	0.21121	0.144781	0.405843	-0.785455	2.7494e-60
non-LUCA	ksgA	0.306713	0.195972	0.721548	-0.937089	1.5113e-210
non-LUCA	leuB	0.225116	0.114448	0.596	0.801439	1.14099e-49
non-LUCA	leuC	0.220943	0.133747	0.725125	-0.856119	1.13255e-58
non-LUCA	leuD	0.263274	0.20107	0.783632	0.807761	1.48345e-47
non-LUCA	leuS	0.247222	0.584245	0.525517	0.915664	1.67837e-81
non-LUCA	lysA	0.281658	0.200339	0.601917	-0.913902	4.36976e-99
non-LUCA	lysS	0.249831	0.569021	0.450734	0.853665	7.70201e-111
non-LUCA	metG	0.270479	0.543619	0.557628	-0.843248	4.63889e-92
non-LUCA	nadA	0.244203	0.159689	0.561587	0.832921	2.72793e-53
non-LUCA	nadC	0.266112	0.135615	0.695535	-0.928324	1.30318e-89
non-LUCA	ndk	0.214682	0.138914	0.475046	-0.497593	2.04069e-24
non-LUCA	pgk	0.242092	0.198282	0.244674	-0.85502	1.4889e-131
non-LUCA	pstB	0.235534	0.173702	0.752931	0.766838	7.36089e-50
non-LUCA	purA	0.24196	0.120401	0.457655	-0.852596	2.59614e-82
non-LUCA	purB	0.25717	0.243341	0.760398	-0.872173	3.5249e-90
non-LUCA	purC	0.255194	0.242155	0.75162	0.731963	5.03498e-39
non-LUCA	purD	0.241953	0.104745	0.645719	-0.895971	9.32005e-96
non-LUCA	purE	0.235015	0.185083	0.558519	0.856833	4.49133e-79
non-LUCA	purF	0.218037	0.156266	0.411919	0.815754	1.12771e-65
non-LUCA	purL	0.222064	0.172121	0.644725	-0.894502	1.07028e-68
non-LUCA	pyrB	0.241447	0.224508	0.587717	-0.91535	9.01798e-173
non-LUCA	pyrC	0.256437	0.198837	0.74296	-0.918804	1.8129e-81
non-LUCA	pyrD	0.252491	0.19489	0.777799	0.900674	2.68861e-94
non-LUCA	pyrG	0.228638	0.147444	0.540405	0.836416	6.49488e-127
non-LUCA	pyrH	0.231675	0.132371	0.466393	0.821315	3.00838e-112
non-LUCA	ribH	0.228124	0.556893	0.371956	-0.86773	1.77481e-92
non-LUCA	rnhB	0.266121	0.244045	0.291987	0.950666	3.84155e-217
non-LUCA	rpe	0.254975	0.140468	0.469694	0.866218	1.03978e-79
non-LUCA	rplW	0.225379	0.169885	0.374271	-0.489178	1.17522e-20
non-LUCA	sdhA	0.182897	0.131921	0.487715	-0.67491	3.28201e-45
non-LUCA	secY	0.221916	0.124644	0.255224	-0.743912	9.89977e-41
non-LUCA	sucC	0.212654	0.117116	0.563958	-0.785849	2.82235e-71
non-LUCA	sucD	0.200007	0.128363	0.450946	0.63844	8.11857e-27
non-LUCA	surE	0.227255	0.119314	0.501345	-0.887933	2.31827e-91
non-LUCA	thiC	0.217734	0.541802	0.633866	0.763119	3.31082e-39
non-LUCA	thiE	0.26143	0.232452	0.839897	-0.937709	2.01808e-109
non-LUCA	thrS	0.23862	0.0996272	0.510911	0.871913	3.54687e-125
non-LUCA	tmk	0.269361	0.160727	0.585681	-0.913685	4.61811e-84
non-LUCA	topA	0.25482	0.107648	0.68792	-0.915001	4.81954e-108
non-LUCA	trpA	0.247856	0.132522	0.515153	0.923264	1.82091e-157
non-LUCA	trpB	0.211856	0.557396	0.278769	0.873704	8.67134e-71
non-LUCA	trpC	0.270861	0.121375	0.662596	0.922383	1.43331e-96
non-LUCA	trpD	0.238778	0.139618	0.569133	-0.920224	4.05347e-138
non-LUCA	trpS	0.258596	0.594772	0.388422	0.836968	7.71755e-56
non-LUCA	truA	0.279045	0.189204	0.390512	-0.957669	3.12737e-196
non-LUCA	upp	0.232791	0.189169	0.524234	0.725679	5.03996e-56
non-LUCA	uvrA	0.234612	0.15292	0.514616	0.887772	2.75921e-117
non-LUCA	uvrB	0.229878	0.1936	0.656091	0.892249	8.4796e-102
non-LUCA	uvrC	0.264733	0.15399	0.444775	-0.922873	6.81054e-180
non-LUCA	valS	0.252953	0.569139	0.672989	0.882662	6.42102e-154
non-LUCA	xseA	0.276113	0.238094	0.707069	0.950109	1.2189e-177
LUCA	alaS	0.251289	0.118387	0.58979	0.893455	3.49642e-166
LUCA	argS	0.270906	0.136852	0.682267	0.924762	2.57001e-207
LUCA	dapB	0.262638	0.165538	0.5727	-0.886149	7.29239e-96
LUCA	dcd	0.23185	0.112246	0.571432	-0.623834	4.83597e-28
LUCA	ffh	0.257429	0.0908727	0.605109	-0.89745	1.12002e-98
LUCA	ftsY	0.290162	0.203557	0.722535	0.882523	6.65021e-59
LUCA	gatB	0.245341	0.576023	0.557701	0.871971	8.01722e-117
LUCA	glnA	0.192221	0.239523	0.654016	-0.568813	2.56825e-22
LUCA	hemA	0.253602	0.121249	0.61384	-0.911601	1.52344e-132
LUCA	hisA	0.252435	0.591155	0.65943	-0.908699	8.40782e-86
LUCA	ileS	0.255761	0.577198	0.790571	0.903649	6.78351e-179
LUCA	leuA	0.232721	0.326492	0.877106	0.832788	3.39408e-51
LUCA	lysC	0.232869	0.126799	0.647795	0.849309	6.37062e-48
LUCA	minD	0.219495	0.134836	0.675414	-0.371232	1.44933e-07
LUCA	moaA	0.255454	0.114273	0.717507	0.956832	3.06497e-137
LUCA	moeA	0.244211	0.160753	0.667298	-0.962775	1.502e-86
LUCA	pheA	0.282903	0.137215	0.55079	-0.915945	3.50656e-91
LUCA	pheS	0.238437	0.12153	0.786599	0.904733	3.89537e-51
LUCA	pheT	0.275243	0.182444	0.687311	0.88419	1.9656e-54
LUCA	prsA	0.251654	0.226482	0.535138	-0.763445	8.32538e-32
LUCA	purM	0.240082	0.144529	0.686263	-0.88659	4.72608e-91
LUCA	pyrE	0.235739	0.164327	0.532483	0.858896	2.06118e-101
LUCA	trxB	0.23783	0.149461	0.685097	-0.827963	1.62077e-67
*All Linear regression models between the evolutionary rates and the first six principal components are significant.
