# Supplementary material for: The GC Content as a Main Factor Shaping the Amino Acid Usage During Bacterial Evolution Process
Source: Front Microbiol. 2018 Dec 7;9:2948. doi: 10.3389/fmicb.2018.02948 (PMC6292993; doi:10.3389/fmicb.2018.02948)
Supplement: TABLE S5 — The deviation of GC content and amino acids for protein coding genes homologous to LUCA genes. [file Data_Sheet_5.xlsx]

## Sheet: Sheet1
Table S5 The deviation of GC content and amino acids for protein coding genes homologous to Luca genes
Sym	GC	A	C	E	D	G	F	I	H	K	M	L	N	Q	P	S	R	T	W	V	Y
Aeromonas_salmonicida_A449_uid58631|pyrE	27.9603	0.058762	-0.00079711	-0.0235646	0.0120563	0.0365176	0.0398804	-0.00194296	0.0138249	-0.0690248	0.0222444	-0.00592851	-0.0580396	0.0482999	0.0114336	-0.0171877	0.0290696	-0.0464317	0.00460829	-0.058214	0.00443393
Aeromonas_salmonicida_A449_uid58631|glnA	20.2271	-0.0167963	-0.00242073	0.00105163	0.00143855	-0.00755982	-0.00301599	-0.00295647	-0.000267868	-0.0408052	0.0174312	0.0190186	0.00382952	0.00858169	0.01256	-0.00516886	0.0349518	-0.00277789	-0.00239097	-0.0209532	0.00625025
Aeromonas_salmonicida_A449_uid58631|argS	24.3065	0.0412047	0.00321427	-0.0425518	0.014259	0.00719182	-0.00616702	-0.0276877	0.0116833	-0.0228435	0.00950597	0.011443	-0.0278246	0.0203347	0.00457053	-0.0134166	0.00406877	0.016117	0.00507228	-0.00893731	0.000763275
Aeromonas_salmonicida_A449_uid58631|ffh	25.416	0.0314161	0	-0.0278431	0.0119826	0.0115033	0.0126797	-0.040915	0.0108061	-0.0484096	0.0165577	-0.0174292	-0.00718954	-0.00962963	0.008061	-0.0075817	0.0365142	-0.00318083	0	0.0383007	-0.0156427
Aeromonas_salmonicida_A449_uid58631|ileS	25.6886	0.0631813	0.00203572	-0.0263253	0.00122793	0.0254252	0.000140044	-0.0311994	0.0164989	-0.0460979	0.00512075	0.00713211	-0.0296133	0.0142358	0.00514003	-0.00564338	0.0225674	-0.00387355	-0.000928555	0.000197889	-0.0192216
Aeromonas_salmonicida_A449_uid58631|prsA	20.8182	0.00472393	-0.0112905	-0.0218887	0.0243791	0.00166399	0.0210399	-0.0220339	-0.00808541	-0.0285781	0.0117037	-0.0133901	-0.0103189	0.00125078	-0.00683463	0.00835344	0.0426383	-0.00739301	0	0.028835	-0.0147749
Aeromonas_salmonicida_A449_uid58631|hemA	30.5815	0.0439265	-0.00351963	-0.00572409	-0.0202159	0.0133646	-0.0179614	-0.0468449	0.017786	-0.0812395	-0.00202911	0.0410832	-0.0489241	0.0606228	0.00821664	0.00745259	0.0396804	-0.0036073	-0.000450913	0.0106591	-0.0122749
Aeromonas_salmonicida_A449_uid58631|nrdD	24.2357	0.0355347	0.00828958	-0.0162107	0.00940407	0.0088238	0.000755273	-0.00677904	-0.0026803	-0.0302754	-0.00481717	-0.0173897	-0.0103343	0.00523165	0.015041	-0.0156489	0.0207332	-0.000884222	-0.00317767	0.0124804	-0.00809616
Aeromonas_salmonicida_A449_uid58631|purM	26.1156	0.0269175	0.00882854	-0.0192932	-0.00213446	0.0328475	-0.00833022	-0.0307213	0.00599643	-0.0480794	-0.0198912	0.0182883	-0.0312529	0.0233213	0.0118932	0.000498318	0.0117935	0.0120593	0.0144928	-0.00463436	-0.00259956
Aeromonas_salmonicida_A449_uid58631|oppF	29.5948	0.0448396	0.0171955	-0.0256021	0.00299727	-0.00468099	0.00742749	-0.032349	0.00231661	-0.0311907	0.0025435	-0.00470487	-0.0448873	0.00951721	0.0478607	0.00997098	0.0206704	-0.00118219	0.00511087	-0.00933809	-0.0165148
Aeromonas_salmonicida_A449_uid58631|hypB	27.9471	0.0513153	0.0144009	0.00201613	-0.030994	0.0118888	-0.0177931	-0.0658922	0.0342102	-0.0766449	0.00276818	0.0101286	-0.0284178	0.0367864	0.0251536	0.0251536	0.015281	-0.0132648	0.00716846	-0.0122568	0.00899258
Aeromonas_salmonicida_A449_uid58631|hypF	32.4017	0.0733569	0.000287334	-0.0349793	-0.0075044	0.0306244	-0.0066135	-0.0644544	0.0301685	-0.0710486	-0.00200973	0.0352089	-0.0544249	0.025218	0.0355845	-0.0217122	0.0331686	0.00428754	0.00860397	0.000396489	-0.014158
Aeromonas_salmonicida_A449_uid58631|pheS	24.4882	0.0292783	-0.0069419	-0.0322569	0.00810398	0.0255107	0.0102202	-0.0290703	0.0206972	-0.0711865	0.0116391	-0.00731498	-0.0111865	0.0298716	0.00892966	-0.0215352	0.0313945	0.00998777	-0.0109419	0.00833639	-0.00353517
Aeromonas_salmonicida_A449_uid58631|pheT	26.842	0.0686214	0.0059935	-0.0387691	0.0123259	0.0149736	-0.0156423	-0.0336431	-0.00303177	-0.0426933	-0.00163562	0.00946354	-0.0257745	0.0200499	-0.00312665	0.000483456	0.0281376	-0.00979338	0.0069559	0.0198601	-0.0127551
Aeromonas_salmonicida_A449_uid58631|dcd	26.7825	0.0537753	-0.0190905	-0.00093063	0.00943206	0.0249761	-0.022637	-0.000603652	0.0116706	-0.0608179	0.016525	0.0256301	-0.021983	-0.0132552	0.03305	-0.0203481	0.0534484	-0.0323457	0.00550833	-0.0148398	-0.0271643
Aeromonas_salmonicida_A449_uid58631|hisA	27.1599	0.0549291	0.0079474	-0.038867	0.00630772	0.0174675	0.00783028	-0.0517836	0.00379802	-0.0922233	-0.0126824	0.0218512	-0.0338977	0.0479186	-0.00508633	0.0189901	0.0319067	0.0193415	0.00379802	-0.0191741	0.0116283
Aeromonas_salmonicida_A449_uid58631|tpiA	16.0897	0.0432161	0.00628101	-0.00796504	0.00678167	0.0135633	0.0433071	-0.0237131	0.010218	-0.0242137	-0.00159301	-0.0253061	-0.0399618	0.0454008	-0.0205271	-0.0279004	0.0301534	-0.012653	0.00787402	-0.0329298	0.00996768
Aeromonas_salmonicida_A449_uid58631|gldA	28.3694	0.0652405	0.013135	-0.0109459	-0.00312279	0.0127004	0.0109941	-0.0639205	0.00592364	-0.0632445	0.014294	0.0150184	-0.0126521	0.0169822	0.012459	-0.074303	0.0351877	-0.00550512	-0.00030584	0.0384232	-0.00635825
Aeromonas_salmonicida_A449_uid58631|lysC	28.7706	0.0670085	0.00264957	-0.0364957	-0.00017094	-0.00324786	-0.0074359	-0.0492308	0.0139316	-0.0504274	-0.0034188	0.0430769	-0.0201709	0.0338462	0.00760684	-0.00820513	0.021453	0.00700855	0.00452991	-0.0183761	-0.00393162
Aeromonas_salmonicida_A449_uid58631|pheA	27.5521	0.0288749	-0.00956755	-0.00656334	-0.0137773	-0.00608496	-0.0368542	-0.0191542	0.00675469	-0.0384998	0.0181783	0.0295637	-0.0510907	0.04801	0.0202641	0.0146575	0.0251626	0.0190968	-0.00489858	-0.0128588	-0.0112132
Aeromonas_salmonicida_A449_uid58631|gcp	26.0042	0.0680597	-0.0093461	-0.0232299	0.00803028	0.0235656	0.00344387	-0.0462702	-0.000666031	-0.0528872	0.00891832	0.019694	-0.0326085	0.0139325	0.021248	-0.0150263	0.0228508	-0.000649787	0.000460266	0.00506292	-0.0145823
Aeromonas_salmonicida_A449_uid58631|alaS	23.672	0.0558434	-0.007709	-0.0242378	-0.000949195	0.025482	0.0132554	-0.0280859	0.00606715	-0.0370545	0.000554125	0.00962535	-0.0150486	0.0131861	-0.00397636	0.00094663	0.0191147	-0.0136274	-0.00546685	0.00733702	-0.0152564
Aeromonas_salmonicida_A449_uid58631|lysC	28.7706	0.0670085	0.00264957	-0.0364957	-0.00017094	-0.00324786	-0.0074359	-0.0492308	0.0139316	-0.0504274	-0.0034188	0.0430769	-0.0201709	0.0338462	0.00760684	-0.00820513	0.021453	0.00700855	0.00452991	-0.0183761	-0.00393162
Aeromonas_salmonicida_A449_uid58631|gldA	28.3694	0.0652405	0.013135	-0.0109459	-0.00312279	0.0127004	0.0109941	-0.0639205	0.00592364	-0.0632445	0.014294	0.0150184	-0.0126521	0.0169822	0.012459	-0.074303	0.0351877	-0.00550512	-0.00030584	0.0384232	-0.00635825
Aeromonas_salmonicida_A449_uid58631|glnA	20.2271	-0.0167963	-0.00242073	0.00105163	0.00143855	-0.00755982	-0.00301599	-0.00295647	-0.000267868	-0.0408052	0.0174312	0.0190186	0.00382952	0.00858169	0.01256	-0.00516886	0.0349518	-0.00277789	-0.00239097	-0.0209532	0.00625025
Amycolatopsis_mediterranei_U32_uid50565|prsA	32.0799	0.0128788	-0.00508314	0.0122723	-0.00828077	-0.00860054	0.014224	-0.0485269	0.0170688	-0.0450095	-0.00127905	0.0204869	-0.0329577	0.0104199	0.00533674	0.0107066	0.0512394	-0.0111256	0	0.0211264	-0.0148966
Amycolatopsis_mediterranei_U32_uid50565|pheA	39.9884	0.112064	-0.0124543	-0.00219927	0.000741326	0.0139864	-0.0125037	-0.0527083	0.0119848	-0.0787783	-0.00415143	0.00689434	-0.0597509	-0.00541168	0.0326431	-0.0133439	0.0566621	0.0355342	-0.00084017	0.0139369	-0.042305
Amycolatopsis_mediterranei_U32_uid50565|hemA	41.4431	0.0669315	-0.00159475	-0.0206776	-0.0128904	0.0434916	-0.0326894	-0.0695914	0.0072817	-0.0869591	-0.012066	0.0226154	-0.0542697	0.0161582	0.0279714	-0.00637901	0.0457905	0.0293796	-0.0052356	0.058055	-0.0153217
Amycolatopsis_mediterranei_U32_uid50565|gcp	30.9476	0.121592	-0.00675392	-0.0249182	-0.00274771	0.0174092	-0.00620857	-0.0536119	-0.00438376	-0.0745029	-0.00648125	0.00176189	-0.0273303	0.00446766	0.0311477	0.000901921	0.0181014	-0.00224432	-0.00260089	0.0432293	-0.0268269
Amycolatopsis_mediterranei_U32_uid50565|glnA	26.9334	-0.0121568	-0.00725625	-0.015714	0.0218728	0.00433294	0.000643318	-0.0075306	0.0156856	-0.0296872	-0.00541144	0.0107945	-0.00475866	0.00513708	0.0158086	-0.0054209	0.0148909	0.00592231	-0.0050141	-0.0172939	0.0151558
Amycolatopsis_mediterranei_U32_uid50565|gatB	32.1022	0.0813809	-0.000953317	0.00571139	-0.00168107	0.0157382	-0.00136188	-0.0368389	-0.00508152	-0.0561649	-0.0225477	0.0154659	-0.019509	-0.00617103	-0.00313233	-0.000591567	0.024948	0.00457933	0.00571565	0.0146487	-0.0141551
Amycolatopsis_mediterranei_U32_uid50565|ffh	35.2965	0.0410243	0.00195312	-0.0339323	0.0147569	0.0410937	0.0151562	-0.0476042	0.00532118	-0.0652431	-0.00538194	-0.0134549	-0.00598958	0.00997396	0.019401	-0.0259896	0.0319271	-0.000329861	0.00195312	0.0353646	-0.02
Amycolatopsis_mediterranei_U32_uid50565|hisA	40.692	0.0949943	-0.00414938	-0.0274565	0.0313764	0.0279686	0.000211883	-0.0905447	0.000211883	-0.103205	-0.0207469	0.0404167	-0.0453253	0.000423766	-0.0160678	0.0180807	0.0641476	0.0177629	0.0129778	-0.00150084	0.000423766
Amycolatopsis_mediterranei_U32_uid50565|trkA	34.4502	0.0606916	0.000124538	0.0103574	-0.00811574	-0.0263398	0.00483623	-0.0808253	0.00464943	-0.0767363	0.013886	0.0150068	-0.013201	0.0184732	0.0278966	-0.0266512	0.032546	0.00973473	0.0137615	0.0424675	-0.0225622
Amycolatopsis_mediterranei_U32_uid50565|trkA	34.4502	0.0606916	0.000124538	0.0103574	-0.00811574	-0.0263398	0.00483623	-0.0808253	0.00464943	-0.0767363	0.013886	0.0150068	-0.013201	0.0184732	0.0278966	-0.0266512	0.032546	0.00973473	0.0137615	0.0424675	-0.0225622
Amycolatopsis_mediterranei_U32_uid50565|alaS	34.1775	0.0443217	-0.011188	-0.0286621	0.00495501	0.0467537	0.0024775	-0.0434714	0.00237122	-0.0434107	-0.0122331	0.00843211	-0.0233832	0.00584073	0.0148701	-0.00194607	0.0318684	-0.000718703	-0.0066885	0.0208475	-0.0110361
Amycolatopsis_mediterranei_U32_uid50565|ileS	34.7036	0.066812	-0.00685256	-0.037793	0.014117	0.0257224	-0.00446419	-0.051704	0.00248766	-0.071096	-0.00895228	0.0149352	-0.0285759	0.0120265	0.0174486	-0.0152349	0.0355921	0.014299	-0.00139736	0.0234076	-0.000777739
Amycolatopsis_mediterranei_U32_uid50565|hypF	38.758	0.0730846	-0.00264642	-0.0269158	0.0110806	0.0351405	0.00128798	-0.0754275	0.0263143	-0.0711968	-0.00711192	0.0042993	-0.0609164	0.00681566	0.0261661	-0.0353157	0.0581038	0.0100275	0.0014885	0.0465264	-0.0208047
Amycolatopsis_mediterranei_U32_uid50565|hypB	35.4742	0.0321736	0.00800493	-0.0107759	-0.0121613	-0.00230911	-0.00985222	-0.085899	-0.00584975	-0.0902094	-0.000769704	0.0404865	-0.0369458	0.0167796	0.0252463	0.033867	0.046952	0.015548	0.00862069	0.0230911	0.00400246
Amycolatopsis_mediterranei_U32_uid50565|speE	36.4102	0.0954433	0.00640394	-0.00985222	-0.00591133	0.0358374	-0.0118227	-0.0470443	0.00258621	-0.0928571	-0.00381773	0.00344828	-0.029064	-0.00800493	0.00874384	-0.00541872	0.0752463	-0.0230296	0.0100985	0.0214286	-0.0224138
Amycolatopsis_mediterranei_U32_uid50565|pheT	40.4093	0.0812908	-0.000838136	-0.0411025	0.0322967	0.0251779	-0.0258788	-0.0647244	-0.00167627	-0.0703697	-0.0123039	0.0142737	-0.0420229	0.00480714	0.0337703	-0.00940317	0.0511854	-0.00322376	0.0110604	0.0300863	-0.0124053
Amycolatopsis_mediterranei_U32_uid50565|glyS	31.7541	0.00876359	-0.000527927	-0.0270827	0.00306198	0.00739098	0.000105585	-0.0325203	0.00205892	-0.0390666	-0.012723	-0.004329	-0.00717981	0.0154683	0.0166825	0.012723	0.0282441	0.0170521	0.0125119	0.00522648	-0.00585999
Amycolatopsis_mediterranei_U32_uid50565|argS	34.8218	0.0704436	-0.00186528	-0.0434124	0.0115303	0.0323377	-0.00751037	-0.0497901	0.00851381	-0.0604154	-0.019607	0.0353295	-0.0620591	0.0155071	0.0188436	-0.00596521	0.0359944	0.0237993	0.00691939	-0.00633457	-0.00225927
Amycolatopsis_mediterranei_U32_uid50565|dcd	35.6454	0.0558738	-0.0142718	0.0068932	-0.0081068	0.0218932	-0.0285437	-0.0379612	0.0205825	-0.0820874	0.00543689	0.0621845	-0.0282524	-0.0239806	0.0358738	-0.0125243	0.0507282	-0.00325243	0.000145631	0.0176214	-0.0382524
Amycolatopsis_mediterranei_U32_uid50565|argS	34.8218	0.0704436	-0.00186528	-0.0434124	0.0115303	0.0323377	-0.00751037	-0.0497901	0.00851381	-0.0604154	-0.019607	0.0353295	-0.0620591	0.0155071	0.0188436	-0.00596521	0.0359944	0.0237993	0.00691939	-0.00633457	-0.00225927
Amycolatopsis_mediterranei_U32_uid50565|prsA	32.0799	0.0128788	-0.00508314	0.0122723	-0.00828077	-0.00860054	0.014224	-0.0485269	0.0170688	-0.0450095	-0.00127905	0.0204869	-0.0329577	0.0104199	0.00533674	0.0107066	0.0512394	-0.0111256	0	0.0211264	-0.0148966
Amycolatopsis_mediterranei_U32_uid50565|lysC	32.2517	0.0665388	-0.00355787	-0.0163479	0.0199769	-0.00233469	-0.0196977	-0.0360558	0.00166981	-0.0346448	-0.00901395	-0.0104148	-0.0299044	0.0133078	0.00262399	-0.00139067	0.018307	0.00953164	0.000238545	0.0202357	0.0109325
Amycolatopsis_mediterranei_U32_uid50565|purM	37.8021	0.0547713	-0.00303435	-0.0129262	-0.00410483	0.034883	-0.00904671	-0.0693877	0.0108979	-0.066635	-0.00629407	0.0293777	-0.0460143	0.00258363	0.0219648	0.00477287	0.0333698	0.0104472	0.00842697	0.014882	-0.00893403
Amycolatopsis_mediterranei_U32_uid50565|pyrE	38.9913	0.0777118	-0.00540541	-0.0524542	0.019537	0.0158526	0.0116107	-0.0442855	0.044843	-0.115356	0.00804751	0.0138892	-0.0721125	0.001721	0.0465641	-0.0047267	0.0501273	0.0113683	0.0134529	-0.00140589	-0.0189795
Amycolatopsis_mediterranei_U32_uid50565|dcd	35.6454	0.0558738	-0.0142718	0.0068932	-0.0081068	0.0218932	-0.0285437	-0.0379612	0.0205825	-0.0820874	0.00543689	0.0621845	-0.0282524	-0.0239806	0.0358738	-0.0125243	0.0507282	-0.00325243	0.000145631	0.0176214	-0.0382524
Aquifex_aeolicus_VF5_uid57765|speE	9.72716	0.0142857	-0.0107143	-0.00714286	-0.00357143	-0.0107143	0.00357143	0.0214286	0.0142857	-0.0285714	0.00357143	-0.0321429	-0.0178571	0.00357143	0.00714286	-0.0142857	0.025	-0.0285714	0	0.0321429	0.0285714
Aquifex_aeolicus_VF5_uid57765|glnA	7.56945	-0.0133669	-0.0135629	0.00210829	-0.000726668	0.000855747	-0.00510102	0.0228374	0.00327479	-0.0206861	0.00540698	0.0052301	-0.00859571	0.00967137	0.0144186	-0.00274891	0.0111438	-0.00422137	0.00360465	-0.0336992	0.0241569
Aquifex_aeolicus_VF5_uid57765|ileS	12.403	0.00741929	0.00617701	0.0142458	-0.0146666	0.00844508	0.00838641	-0.0208841	0.00487403	-0.00337884	-0.00961251	0.0246676	-0.0244754	0.00262417	0.0123338	-0.016265	0.0182154	-0.0197187	-0.00309963	0.00518764	-0.000475466
Aquifex_aeolicus_VF5_uid57765|gatB	8.21185	0.00346147	-0.00237307	0.0379022	-0.0220044	-0.00124452	0.0142429	-0.00562935	0.00177088	0.0107056	-0.0174992	0.00704338	-0.009412	-0.00273439	0.00326074	-0.0154071	0.00957704	-0.013556	0.00201176	0.00680251	-0.00691849
Aquifex_aeolicus_VF5_uid57765|hypB	12.6724	0.00253378	0.00144788	0.0301641	-0.0447635	-0.00904923	-0.0125483	-0.0658784	0.0209942	-0.0272683	0.0047056	0.0437983	-0.0250965	0.00591216	0.0246139	0.0323359	0.0174952	0.00108591	0.003861	-0.0147201	0.0103764
Aquifex_aeolicus_VF5_uid57765|hypF	12.5864	0.0109481	-0.00198551	0.0109986	-0.0128763	0.00338337	0.0119409	-0.0526057	-0.000775428	-0.00227586	0.00190554	0.0219832	-0.0402006	0.00190554	0.0239183	-0.021825	0.0252153	-0.0133544	0.0054054	0.0350334	-0.00673892
Aquifex_aeolicus_VF5_uid57765|purM	10.6787	-0.026316	-0.00239787	0.0167591	-0.0236065	0.0256668	0.0198409	-0.0126732	-0.00812853	-0.00647513	-0.00719362	0.0102494	-0.0121452	0.000623274	0.013487	-0.0127685	0.0130195	0.00218146	0.0060423	-0.0036098	0.00744466
Aquifex_aeolicus_VF5_uid57765|ftsY	11.1604	0.0201543	0.00433839	0.0456544	-0.0100024	-0.00407809	0.012538	-0.0280983	0.00206315	0.0227959	-0.0379369	0.00168715	-0.0159798	-0.00545192	-0.0138106	-0.0359798	0.00587129	-0.0185732	0.00433839	0.0422704	0.00819957
Aquifex_aeolicus_VF5_uid57765|argS	9.15014	-0.0192134	-0.00540339	0.00351236	0.0123311	0.00183346	0.0177345	-0.0244107	0.00816418	0.0249714	-0.0129342	0.0282473	-0.0468637	-0.00036063	0.00104552	-0.00840662	0.0124857	-0.0149586	0.00332749	-0.000603071	0.0195013
Aquifex_aeolicus_VF5_uid57765|pheA	10.34	0.0194401	-0.0113383	0.0404263	-0.0108023	-0.00803991	-0.0108023	-0.0112353	0.0136678	0.0145955	0.000824606	0.0191515	-0.0591655	0.0006803	-0.000432918	-0.00445287	0.0236044	0.00412303	-0.00193782	-0.00197906	-0.0163272
Aquifex_aeolicus_VF5_uid57765|pheS	12.4907	-0.0143314	0.00775148	0.00617751	-0.00857988	0.00813018	0.00813018	-0.0188284	0.0106272	-0.022284	0.0105444	0.00459172	-0.0273728	0.00766864	0.0102959	-0.00753846	0.0171716	-0.000579882	-0.00808284	0.0149231	0.0015858
Aquifex_aeolicus_VF5_uid57765|lysC	12.2379	0.0346926	-0.00104521	0.0087787	-0.00308928	-0.0155906	-0.00740912	-0.00617856	-0.000499434	0.0165071	0.00327464	-0.0142725	-0.024776	0.00404696	0.00782103	-0.0244568	0.00945835	-0.0038616	0.00509216	0.00505097	0.0064566
Aquifex_aeolicus_VF5_uid57765|cysG	10.691	-0.0080879	0.006465	0.00210179	-0.0115732	-0.00236784	-0.0368212	-0.0032458	-0.00995025	0.0154043	0.000372469	0.0380451	-0.0272435	0.000744938	0.0225078	-0.020406	0.019395	0.00223482	0.00534759	0.0159098	-0.00883284
Aquifex_aeolicus_VF5_uid57765|hemA	11.2973	0.00305625	-0.0081629	0.0313749	-0.0360431	0.00999407	-0.00247595	-0.0305109	-0.00339154	-0.0114255	-0.00878188	0.0175251	-0.0237279	-0.00600934	0.0163129	-0.00555799	0.0321616	-0.0172543	-0.000309494	0.0327676	0.0104583
Aquifex_aeolicus_VF5_uid57765|alaS	11.2109	0.00821347	-0.00765358	0.024824	-0.0200397	0.0216444	0.0159317	-0.0172803	0.00740531	-0.00202751	-0.0107582	0.00687645	-0.0194035	-0.00377313	0.000840484	-0.000981427	0.0207393	-0.0236292	-0.00310462	0.00802985	-0.00585365
Aquifex_aeolicus_VF5_uid57765|hisA	7.5383	0.00067994	-0.00414938	0.0347641	-0.0160222	0.00540465	0.0379197	-0.0362983	0.000104606	-0.0152376	-0.0165452	0.00104606	-0.0160745	-0.00819415	-0.00373095	-0.00367865	0.025367	-0.0122389	0.00430629	-0.00704348	0.029621
Aquifex_aeolicus_VF5_uid57765|dcd	11.7401	0.00976268	-0.0131607	0.0424488	-0.0186624	0.0257821	-0.00409924	0.00426106	-0.00830636	-0.0415318	0.00765912	0.0438511	-0.0360302	-0.000647249	0.0208738	-0.0214132	0.0535059	-0.0304746	0.000701187	-0.020712	-0.013808
Aquifex_aeolicus_VF5_uid57765|ffh	13.4714	0.00824278	0	0.0102496	-0.00930005	-0.00951542	0.010837	-0.0205874	0.00656877	-0.0320313	-0.00259422	0.00342633	-0.00910426	-0.00922173	0.00631424	-0.0158884	0.0328047	0.00395497	0	0.0282232	-0.00237885
Aquifex_aeolicus_VF5_uid57765|pheT	12.3707	0.0010644	-0.00386398	0.011182	-0.00356818	0.00701526	-0.00693141	-0.0290858	-0.00514732	0.00781181	-0.0113381	0.0101386	-0.0208571	0.000528706	-0.00693141	0.000549668	0.024798	-0.0187982	0.00335624	0.0279283	0.0121486
Aquifex_aeolicus_VF5_uid57765|rfaG	9.57289	0.0290952	-0.00583282	0.0359538	-0.00974434	0.00274801	0.00868034	-0.0198867	-0.00894825	0.00155389	0.0242575	-0.0286359	-0.0634645	0.0132884	-0.0093463	-0.0245254	0.0486145	0.00172229	0.0107701	0.00354409	-0.00984385
Aquifex_aeolicus_VF5_uid57765|moaA	4.22477	-0.0327231	-0.011553	-0.0168771	0.0119949	0.012237	0.025705	-0.0118161	-0.040888	0.0150989	0.00167298	0.0283249	0.00261995	-0.00770202	-0.012763	0.01008	0.041088	-0.00290404	0.002883	-0.00605008	-0.00842803
Archaeoglobus_fulgidus_DSM_4304_uid57717|gltX	12.8102	-0.0032112	0.00188028	0.0297444	-0.0194405	0.0076781	0.00571933	0.00412681	-0.00889129	0.00795278	-0.00706332	-0.0193097	-0.0178218	-0.00894361	0.00391753	0.000274685	0.0167525	-0.00698484	0.00552313	0.00235117	0.00574549
Archaeoglobus_fulgidus_DSM_4304_uid57717|ileS	16.6383	0.0310751	0.00116472	0.0172523	-0.000961418	0.00769704	0.00846656	-0.0164657	-0.00359487	-0.0200454	0.00331176	-0.00476909	-0.0324716	-0.000678313	0.00154473	-0.0167849	0.0289736	-0.020775	0.00826895	0.00905937	-0.000267905
Archaeoglobus_fulgidus_DSM_4304_uid57717|lysC	15.7971	0.028971	0.00013875	-0.0205073	0.000666001	0.0032745	-0.00169275	-0.0181485	-0.00197025	-0.014208	0.0024975	0.000999001	-0.00799201	-0.001998	0.0154568	0.000943501	0.00696526	-0.0208125	0.00219225	0.0120713	0.0131535
Archaeoglobus_fulgidus_DSM_4304_uid57717|argS	15.4357	0.00400986	-0.00519094	0.0108421	0.00512013	0.00716047	0.0103111	0.000421582	0.0113666	-0.00648143	-0.0099442	0.0100761	-0.0394871	-0.00143853	0.00253271	-0.0056447	0.015885	-0.00415146	0.0055739	-0.00846705	-0.00249409
Archaeoglobus_fulgidus_DSM_4304_uid57717|glyS	15.9475	0.000378996	-0.00515313	0.00955437	-0.00655297	0.000464576	0.00739654	-0.00996393	0.00538541	-0.0169203	-0.00857632	-0.00125313	-0.0207592	0.00539764	0.00374106	-0.00495752	0.0214316	0.000305642	0.00180329	0.0267804	-0.00850296
Archaeoglobus_fulgidus_DSM_4304_uid57717|glnA	13.0518	-0.0171883	-0.00143845	-0.00801421	0.0109505	0.00381303	-0.0116583	0.00300932	-0.00184943	-0.0230745	0.0185172	0.0142018	-0.0204031	0.00426055	0.0113615	-0.00106399	0.0172842	-0.012051	0.00691368	-0.0173755	0.0238052
Archaeoglobus_fulgidus_DSM_4304_uid57717|tpiA	17.4278	0.0388553	-0.00388813	0.0074652	-0.000103683	-0.000207367	0.0269058	-0.0328935	0.000596179	-0.000803546	-0.00837243	-0.00987584	-0.0187408	0.00318826	-0.020633	-0.0168485	0.0204256	-0.020633	0	0.0189222	0.0166412
Archaeoglobus_fulgidus_DSM_4304_uid57717|hypF	18.1213	0.0276317	0.000869352	-0.000359309	-0.00712308	0.0214726	0.00827812	-0.0453816	0.000706348	-0.0380341	0.0047604	0.00672345	-0.0479826	-0.00199635	0.0149262	-0.0241473	0.0486557	-0.0063694	0.00140569	0.0356855	0.000278683
Archaeoglobus_fulgidus_DSM_4304_uid57717|hypB	15.017	0.0144837	-0.00428248	0.0370475	-0.0302804	0.00995879	-0.00856496	-0.0300986	-0.0174935	-0.0391484	0.00482789	0.0236547	-0.0171299	-0.00434308	-0.00428248	0.018342	0.0454307	-0.0219578	0.00452489	0.0101406	0.00917098
Archaeoglobus_fulgidus_DSM_4304_uid57717|pheT	17.0886	0.0133284	0.000115497	-0.000419089	0.0135363	-0.00287093	-0.00305572	-0.0298312	0.00754361	-0.0445489	0.0130743	-0.00426019	-0.0339726	-0.010761	0.000600585	0.00603885	0.0332995	-0.00115827	0.010992	0.0301975	0.00215155
Archaeoglobus_fulgidus_DSM_4304_uid57717|proS	14.7279	0.0313043	0.00913043	-0.0134783	-0.01	0.000434783	0.00956522	-0.0165217	0.0108696	-0.0108696	-0.00434783	-0.00913043	-0.00652174	-0.00130435	0.00173913	0.000869565	0.0173913	-0.0191304	0.00826087	0.00826087	-0.00652174
Archaeoglobus_fulgidus_DSM_4304_uid57717|gldA	17.9169	0.0107648	-0.000145009	-0.00676425	-0.00560418	0.0113448	0.00168893	-0.0659194	0.00183394	-0.0187403	0.016224	0.0241398	-0.0107221	-0.00371906	0.0039579	-0.0217343	0.0130849	-0.00830817	0.00270399	0.0576539	-0.00174011
Archaeoglobus_fulgidus_DSM_4304_uid57717|purM	15.798	0.0043546	0.00373625	0.00826504	-0.00207279	0.0202489	0.00191603	0.00305693	0.0010451	-0.021085	-0.000949304	0.0138215	-0.0362042	-0.00538229	0.00460717	-0.00954529	0.0284007	0.00851761	0.00607903	-0.0303777	0.00156766
Archaeoglobus_fulgidus_DSM_4304_uid57717|pyrE	19.1456	0.0252353	0.000212572	-0.00740966	0.0241725	0.00816884	0.0228971	-0.00264197	0.00561798	-0.0344367	0.0283025	-0.00719708	-0.0754631	-0.0105982	0.00625569	0.0358336	0.0345582	-0.042393	0	0.010082	-0.0211965
Archaeoglobus_fulgidus_DSM_4304_uid57717|mch	11.1387	0.00515343	-0.00268448	0.023455	0.0109339	-0.0203002	0.000754399	0.0202904	-0.00605479	-0.0140397	-0.00550613	-0.0264236	0.00715209	0.0129326	0.0103167	-0.0236705	-0.00268448	-0.00227299	6.85817e-05	-0.00723047	0.0198103
Archaeoglobus_fulgidus_DSM_4304_uid57717|pheS	17.8838	0.0126329	-0.00578059	-0.0100759	-0.0035865	0.0346076	-0.0160253	-0.0252574	0.00298734	-0.0380506	0.00542616	0.0179241	-0.0434515	0.00931646	0.0064135	-0.0164641	0.0318397	0.014962	0.00498734	0.00551055	0.0120844
Archaeoglobus_fulgidus_DSM_4304_uid57717|hemA	18.2005	0.0205231	0.00521763	0.0339056	-0.0222962	0.0362479	-0.0144249	-0.0193849	-0.00655349	-0.0344328	-0.0121186	0.0152875	-0.0451795	0.00455869	-0.00426516	0.00485222	0.0362479	-0.0144249	-0.00294727	0.0300059	-0.0108186
Archaeoglobus_fulgidus_DSM_4304_uid57717|moaA	13.1426	-0.0166758	-0.003276	0.00710938	-0.0133429	0.0271863	0.0102489	-0.00649513	-0.0336245	-0.0165734	0.00682501	0.00704113	0.003549	-0.00668851	-0.00997588	-0.00664301	0.0406657	0.0237851	1.1375e-05	-0.00985076	-0.003276
Archaeoglobus_fulgidus_DSM_4304_uid57717|gatB	13.3506	0.0266611	-0.00273025	0.00354499	-0.00472377	-0.01122	0.021361	-0.0137509	-0.00282993	-0.0167802	-0.0120564	0.0271985	-0.0147867	-0.00362733	0.00380502	0.00420372	0.0160998	-0.0207846	0.00183317	-0.00185484	0.000437707
Archaeoglobus_fulgidus_DSM_4304_uid57717|alaS	16.5718	0.0280046	-0.00243271	0.0138934	-0.00762728	0.00994615	0.00722389	-0.0244261	0.00415516	-0.0234609	-0.00372702	0.0142399	-0.0228026	-0.00707293	0.00837961	-0.00622903	0.0314025	-0.0241143	-0.000190558	0.0109286	-0.00609044
Archaeoglobus_fulgidus_DSM_4304_uid57717|speE	10.1547	0.0199018	0.00430165	0.0183749	0.00292087	-0.00123473	0.0166224	0.00634626	0.0010223	-0.0259426	0.0115905	-0.0070632	-0.0205523	-0.00983802	-0.00925385	-0.0125332	0.0379049	-0.0418348	0.00400956	0.0180828	-0.0128253
Azospirillum_B510_uid46085|lysC	30.6643	0.0624181	-0.00581758	-0.0292127	0.0192776	-0.0076112	-0.0217262	-0.0393038	-0.000358725	-0.0166885	-0.00131013	-0.00879656	-0.0269512	0.028542	-0.00890573	-0.00452305	0.0147701	-0.000842223	0.00272943	0.035233	0.0090773
Azospirillum_B510_uid46085|hemA	41.9962	0.136634	-0.00405966	-0.0242634	-0.000342737	0.0419971	-0.0238261	-0.0723884	0.00686656	-0.103176	-0.00324418	0.0411048	-0.0635482	0.00199142	0.0181532	-0.0207533	0.0758571	0.00551925	0.00153641	0.00606881	-0.0201269
Azospirillum_B510_uid46085|pheA	33.8757	0.0719838	-0.00849917	-0.0228027	-0.00362769	0.0276223	-0.00362769	-0.0163765	0.0235282	-0.0543118	0.0133706	0.00445688	-0.0513578	0.0160655	0.0185012	-0.00761816	0.0398528	0.0251866	-0.00746269	-0.0404229	-0.024461
Azospirillum_B510_uid46085|ffh	32.2282	0.0310002	0	-0.0215907	0.00735117	0.0349675	-0.000477223	-0.0302675	-0.00010605	-0.0466185	0.0032779	-0.00482044	-0.0138106	-0.00111352	0.00137383	-0.0229646	0.0362401	0.000949626	0	0.0444396	-0.0178308
Azospirillum_B510_uid46085|ileS	33.2841	0.0727554	0.00324082	-0.0213268	-0.00126351	0.0209464	0.00903532	-0.0338912	0.00417409	-0.0561349	-0.0115459	0.0122085	-0.0377853	0.00822922	0.0140576	-0.0114608	0.0411625	-0.00122967	0.00251984	0.00419153	-0.017883
Azospirillum_B510_uid46085|nifH	28.0038	0.0601025	-0.00222999	0.0168	-0.000461007	-0.00492099	-0.0119755	-0.0477411	0.0169393	-0.00317345	-0.00158672	0.0140875	-0.0205952	0.00815876	-0.00174754	-0.0108498	0.00815876	0.00176898	0.0033557	-0.0129189	-0.0111714
Azospirillum_B510_uid46085|ftsY	35.8465	0.0823217	0.00248756	-0.00208955	-0.000829187	-0.0078607	0.00736318	-0.0493532	0.0055058	-0.0659038	-0.0320066	-0.0165837	-0.018408	-0.0342289	0.0562189	-0.00358209	0.0230846	0.0284909	0.00746269	0.0329353	-0.0150249
Azospirillum_B510_uid46085|purM	34.1733	0.0643441	-0.000129873	-0.043467	0.00208609	0.0500499	-0.0145215	-0.0634593	-0.00302767	-0.0663247	-0.0117211	0.027452	-0.0346112	0.00553585	0.00820637	0.00234584	0.0253009	0.0307069	0.0113314	0.00736219	0.00254065
Azospirillum_B510_uid46085|gltX	33.5446	0.0769577	-0.0047355	-0.0438785	0.0155348	0.0256757	-0.0036498	-0.0278702	-0.00172095	-0.0634442	-0.00779626	0.0274313	-0.019404	0.0204435	0.0030954	0.000623701	0.0299492	0.00703396	0.00414645	-0.0204551	-0.0179372
Azospirillum_B510_uid46085|glnA	24.378	0.00155851	-0.00290189	-0.0256103	0.0205953	0.00938453	-0.0136298	-0.0112777	0.0139358	-0.0142895	0.0182002	0.000965703	-0.00646352	-0.0031218	0.00588983	-0.000616711	0.000482852	4.30264e-05	-0.00918852	-0.0102451	0.0262891
Azospirillum_B510_uid46085|prsA	30.1905	0.0243566	-0.00804419	-0.0185084	0.00534412	0.00507523	0.0115173	-0.0410276	-0.0112596	-0.0509316	0.0117862	0.00292414	-0.0101953	0.00454866	-0.00992639	0.011775	0.0621576	0.00239757	0	0.0227545	-0.0147439
Azospirillum_B510_uid46085|pheS	32.7839	0.0521408	0.00408451	-0.0535775	0.0316901	0.0220563	0.00233803	-0.0244789	0.0178028	-0.0689296	0.0174366	0.00540845	-0.025831	0.00371831	0.0191549	-0.00656338	0.0256056	0.00870423	-0.0083662	-0.0141127	-0.00828169
Azospirillum_B510_uid46085|hisA	33.5856	0.0629936	0.0119797	-0.0146734	0.0143722	0.0134353	0.0199271	-0.043719	-0.000234239	-0.0841587	-0.00461786	0.0178189	-0.03793	0.00356378	-0.00105408	0.00689332	0.035939	0.0153092	0.00379802	-0.0191741	-0.000468478
Azospirillum_B510_uid46085|gatB	25.4443	0.0423658	-0.0066438	-0.00905411	0.00868329	0.0167177	0.0200859	-0.0167177	-0.00463521	-0.0276876	-0.0177374	0.00831247	-0.0202404	-0.000988845	-0.00970304	0.0278113	0.00278113	-0.00982664	0.00401718	-0.0044807	-0.00305924
Azospirillum_B510_uid46085|argS	34.0823	0.0794993	-0.00371447	-0.0465816	0.0222627	0.023728	-0.00473957	-0.0314825	0.00463706	-0.0421435	-0.00791134	0.0122831	-0.0555542	0.00981681	0.0214004	-0.0103414	0.030976	0.00367226	0.00841182	-0.00612646	-0.00809223
Azospirillum_B510_uid46085|alaS	30.5931	0.0591173	-0.00219775	-0.0588177	0.00428451	0.0209564	0.0046175	-0.0287373	0.0351641	-0.0599831	0.00527239	0.0205346	-0.0124317	-0.00439551	0.0129312	0.0109666	0.0300693	-0.00360742	-0.00738134	-0.0165941	-0.00976779
Azospirillum_B510_uid46085|glnA	24.378	0.00155851	-0.00290189	-0.0256103	0.0205953	0.00938453	-0.0136298	-0.0112777	0.0139358	-0.0142895	0.0182002	0.000965703	-0.00646352	-0.0031218	0.00588983	-0.000616711	0.000482852	4.30264e-05	-0.00918852	-0.0102451	0.0262891
Azospirillum_B510_uid46085|glnA	24.378	0.00155851	-0.00290189	-0.0256103	0.0205953	0.00938453	-0.0136298	-0.0112777	0.0139358	-0.0142895	0.0182002	0.000965703	-0.00646352	-0.0031218	0.00588983	-0.000616711	0.000482852	4.30264e-05	-0.00918852	-0.0102451	0.0262891
Azospirillum_B510_uid46085|hypF	39.0478	0.0913771	-0.00198551	-0.0332374	0.00186903	0.0449383	-0.00548537	-0.067351	0.0179913	-0.0813643	0.00190554	0.0206427	-0.0616483	0.0045865	0.0373231	-0.0392513	0.0640893	-0.00263054	0.0107673	0.0269905	-0.0295271
Azospirillum_B510_uid46085|hypB	35.5326	0.0545046	-0.00373285	-0.00317797	-0.0179328	0.0375555	-0.0102906	-0.0821731	0.0485775	-0.0906477	-0.00819713	0.000378329	-0.04318	0.0148557	0.0216909	0.0216909	0.0544038	-0.00108454	0.00564972	-0.00691082	0.00802058
Azospirillum_B510_uid46085|prsA	30.1905	0.0243566	-0.00804419	-0.0185084	0.00534412	0.00507523	0.0115173	-0.0410276	-0.0112596	-0.0509316	0.0117862	0.00292414	-0.0101953	0.00454866	-0.00992639	0.011775	0.0621576	0.00239757	0	0.0227545	-0.0147439
Bacillus_anthracis_A0248_uid59385|prsA	0.521925	-0.0221809	-0.00828763	-0.000615527	-0.00212137	-0.00245112	0.00781499	0.0112004	0.0011761	-0.0198727	0.00499016	-0.00508909	0.00484727	0.000846349	-0.00113213	0.0136515	0.0225986	-0.0049462	0	0.00187955	-0.00230822
Bacillus_anthracis_A0248_uid59385|purM	4.61671	0.00351127	9.93756e-05	0.0151962	-0.0254402	0.0498534	0.00316346	-0.0164715	0.000149063	-0.0308975	0.00607847	0.020902	-0.0284297	0.0116601	0.00311377	-0.00540769	0.0117098	0.000347815	0.00289017	-0.0222519	0.000223595
Bacillus_anthracis_A0248_uid59385|gatB	0.653793	0.0374099	-0.00860958	0.00718213	0.00137807	0.00127034	0.00815172	-0.00307485	-0.00653125	-0.00334418	-0.0173538	0.0201638	-0.00912131	0.0037796	-0.00693525	0.00790933	-0.00901358	0.00143194	0.0020514	-0.0263135	-0.000430928
Bacillus_anthracis_A0248_uid59385|hisA	4.58792	0.025556	0.00840292	-0.0076043	-0.00366326	-0.0117537	0.025174	-0.0115453	-0.00411465	-0.0407993	-0.00401049	0.0174309	-0.0329867	0.0168753	-0.020608	0.00453133	0.0210247	0.00861126	-0.00411465	0.00508689	0.00850709
Bacillus_anthracis_A0248_uid59385|ileS	2.90263	0.0193995	-0.00095682	-0.00184155	-0.00671459	0.00101861	-0.000930605	-0.0463917	0.00970114	-0.026041	-0.00675391	0.0223345	-0.0115595	0.0155076	0.00100269	-0.00284893	0.0106786	0.00489176	-0.00481499	0.0223392	0.00198011
Bacillus_anthracis_A0248_uid59385|hypF	0.136758	0.00227647	-0.00399969	-0.0237642	0.00608395	0.000895878	0.00363198	-0.0187516	0.0114893	-0.0121913	0.00375734	-0.00706172	-0.023714	0.0217986	0.00622602	-0.00559756	0.00623437	-0.000267426	0.00256896	0.0216147	0.00876991
Bacillus_anthracis_A0248_uid59385|glnA	-0.796152	-0.0153214	-0.00443381	-0.00636287	0.0092716	-0.00869592	-0.00873631	0.00250475	0.0045954	-0.019937	0.00684765	0.0295823	0.0114633	0.00684765	-0.00200986	-0.013261	0.0159173	0.000191896	-0.00219165	-0.0109078	0.0046358
Bacillus_anthracis_A0248_uid59385|ffh	5.18732	0.0224152	0	-0.00871566	0.00457807	0.00240535	0.00895323	-0.0287602	0.0133729	-0.0264242	0.00900767	-0.00643405	-0.0110616	0.013467	-0.00215293	-0.0243801	0.0156496	0.00456818	0	0.0290572	-0.0155457
Bacillus_anthracis_A0248_uid59385|ftsY	2.67554	0.00242486	0.00303951	0.00755826	0.0143533	0.00206687	0.0255927	-0.0380344	0.00163458	-0.0474097	-0.0201283	-0.0260047	0.00618034	0.00500507	-0.0150963	-0.0198987	0.0158865	0.00967916	0.00303951	0.0749139	-0.00480243
Bacillus_anthracis_A0248_uid59385|sun	4.43354	0.0389053	-0.00243737	0.00897816	0.00601629	0.0185425	-0.0231704	-0.0158892	0.0190979	-0.0147168	-0.00487474	0.00311613	-0.0505677	0.0256695	0.000617055	-0.0120017	0.0185425	-0.0211959	0.00900901	0.00240652	-0.00604714
Bacillus_anthracis_A0248_uid59385|pyrE	6.42528	0.0535393	0.0136422	0.0027027	-0.00990991	0.0160875	0.00823681	-0.0042471	0.0190476	-0.0433719	0.0136422	-0.0265122	-0.0572716	0.0123552	0.0171171	0.0126126	0.00694981	-0.00772201	0.0190476	-0.0420849	-0.003861
Bacillus_anthracis_A0248_uid59385|ileS	2.90263	0.0193995	-0.00095682	-0.00184155	-0.00671459	0.00101861	-0.000930605	-0.0463917	0.00970114	-0.026041	-0.00675391	0.0223345	-0.0115595	0.0155076	0.00100269	-0.00284893	0.0106786	0.00489176	-0.00481499	0.0223392	0.00198011
Bacillus_anthracis_A0248_uid59385|alaS	3.62948	0.0324297	-0.0100285	-0.00544232	-0.00252242	0.0157358	0.00953424	-0.0284448	0.0036384	-0.0203679	0.000366898	-0.00233897	0.0029148	0.00607929	0.000397472	0.00289951	0.00280779	-0.00940175	-0.00324093	0.0169792	-0.0119955
Bacillus_anthracis_A0248_uid59385|spoVB	8.21964	0.0496727	-0.000874568	0.0138428	-0.0116427	-0.0135558	-0.0172317	-0.0249252	0.0134875	-0.0246792	0.00911464	0.00204977	-0.0361579	0.0338075	0.00394922	-0.0370188	0.020935	0.0315391	-0.0056027	0.0119297	-0.0186392
Bacillus_anthracis_A0248_uid59385|pheA	6.31185	0.0425742	-0.0153209	-0.000619693	-0.0169031	0.0042983	-0.0204367	-0.0292838	0.0347424	-0.029086	0.0172723	0.0060519	-0.0400823	0.00607827	0.0158879	-0.0137651	0.00921629	0.0227572	0.00313802	0.00624967	-0.00276884
Bacillus_anthracis_A0248_uid59385|hemA	5.20061	0.0145394	-0.00408	0.011615	-0.0185133	0.00803028	-0.00584878	-0.0228999	0.00231121	-0.0401278	0.00797132	0.0295741	-0.0455403	0.0199637	0.00906797	0.00845479	0.00577803	0.0166737	0.00152115	0.0104005	-0.00889109
Bacillus_anthracis_A0248_uid59385|pheT	7.28089	0.0502952	-0.0028218	-0.00588994	-0.0106153	0.0167919	-0.0146733	-0.0478451	0.00180058	-0.0195331	0.00563464	-0.00137507	-0.0273087	0.0122905	-0.00971056	0.0038251	0.010257	0.00596608	0.00191703	0.0264891	0.00450592
Bacillus_anthracis_A0248_uid59385|glyS	5.60967	0.00276159	0.00397121	-0.0110616	-0.000699907	-0.000699907	0.0224122	-0.029921	0.00222905	-0.0189812	0.00705993	0.00280724	0.00185628	0.0114039	0.00838367	0.00448093	0.000578184	0.0110311	0.012682	-0.0181672	-0.0121267
Bacillus_anthracis_A0248_uid59385|speE	-1.85691	0.0178571	-0.00595238	-0.0134921	-0.00198413	-0.027381	0.00436508	0.00238095	0.00833333	-0.031746	0.0031746	0.0138889	0.0126984	0.0261905	-0.0047619	0.0234127	0.0126984	-0.0234127	0.00119048	-0.00357143	-0.0138889
Bacillus_anthracis_A0248_uid59385|argS	3.85432	0.0354437	-0.0052368	-0.0195172	0.0134479	0.0153736	-0.0046966	-0.023877	0.0056499	-0.00566896	0.000571981	0.00521773	-0.0291774	0.0200066	0.000413097	-0.00983807	0.0025612	0.000762641	0.00186211	-0.0183542	0.0150558
Bacillus_anthracis_A0248_uid59385|speE	-1.85691	0.0178571	-0.00595238	-0.0134921	-0.00198413	-0.027381	0.00436508	0.00238095	0.00833333	-0.031746	0.0031746	0.0138889	0.0126984	0.0261905	-0.0047619	0.0234127	0.0126984	-0.0234127	0.00119048	-0.00357143	-0.0138889
Bacillus_cereus_E33L_uid58103|oppF	5.05707	0.0306978	0.00382953	-0.0207471	-0.000799742	0.0105658	0.0152566	-0.0171022	0.0114271	-0.0172252	-0.0237769	-0.0174713	-0.0478615	0.0268682	0.00735147	0.014826	0.0190246	0.0148875	-6.15186e-05	-0.0169791	0.00728995
Bacillus_cereus_E33L_uid58103|oppF	5.05707	0.0306978	0.00382953	-0.0207471	-0.000799742	0.0105658	0.0152566	-0.0171022	0.0114271	-0.0172252	-0.0237769	-0.0174713	-0.0478615	0.0268682	0.00735147	0.014826	0.0190246	0.0148875	-6.15186e-05	-0.0169791	0.00728995
Bacillus_cereus_E33L_uid58103|purM	5.19308	0.00351127	9.93756e-05	0.0151962	-0.0254402	0.0527436	0.00316346	-0.0164715	0.000149063	-0.0337877	0.00607847	0.020902	-0.0284297	0.0116601	0.00311377	-0.00540769	0.0117098	0.000347815	0.00289017	-0.0222519	0.000223595
Bacillus_cereus_E33L_uid58103|gatB	0.233625	0.0353047	-0.00860958	0.00718213	0.00137807	0.00127034	0.00815172	-0.00728538	-0.00653125	-0.00334418	-0.0173538	0.0222691	-0.00912131	0.0037796	-0.00693525	0.00790933	-0.00901358	0.0035372	0.0020514	-0.0242083	-0.000430928
Bacillus_cereus_E33L_uid58103|proS	3.1495	0.0237486	0.0165875	-0.00162587	-0.0187797	0.000127877	-0.00580928	-0.025886	0.00549872	0.00540738	0.0139752	-0.0284984	0.00310559	0.0310011	-0.00776398	0.00288637	-0.0119657	-0.00624772	0.0122397	0.0104859	-0.0184874
Bacillus_cereus_E33L_uid58103|pyrE	3.47433	-0.0147147	0.00570571	0.0193694	-0.00435435	0.0184685	0.016967	-0.0201201	0.0166667	-0.0354354	0.0112613	0.0306306	-0.0533033	0.0226727	0.0115616	-0.00960961	0.0117117	0.00735736	0.00555556	-0.0301802	-0.0102102
Bacillus_cereus_E33L_uid58103|oppF	5.05707	0.0306978	0.00382953	-0.0207471	-0.000799742	0.0105658	0.0152566	-0.0171022	0.0114271	-0.0172252	-0.0237769	-0.0174713	-0.0478615	0.0268682	0.00735147	0.014826	0.0190246	0.0148875	-6.15186e-05	-0.0169791	0.00728995
Bacillus_cereus_E33L_uid58103|oppF	5.05707	0.0306978	0.00382953	-0.0207471	-0.000799742	0.0105658	0.0152566	-0.0171022	0.0114271	-0.0172252	-0.0237769	-0.0174713	-0.0478615	0.0268682	0.00735147	0.014826	0.0190246	0.0148875	-6.15186e-05	-0.0169791	0.00728995
Bacillus_cereus_E33L_uid58103|oppF	5.05707	0.0306978	0.00382953	-0.0207471	-0.000799742	0.0105658	0.0152566	-0.0171022	0.0114271	-0.0172252	-0.0237769	-0.0174713	-0.0478615	0.0268682	0.00735147	0.014826	0.0190246	0.0148875	-6.15186e-05	-0.0169791	0.00728995
Bacillus_cereus_E33L_uid58103|hisA	3.6157	0.0213719	0.00840292	-0.0076043	-0.00366326	-0.0117537	0.025174	-0.0115453	-0.00411465	-0.0366152	-0.00401049	0.0174309	-0.0288026	0.0168753	-0.0164239	-0.00383687	0.0168406	0.0211636	-0.00411465	-0.00328131	0.00850709
Bacillus_cereus_E33L_uid58103|cysG	13.2568	0.0543214	-0.00329747	-0.0219831	-0.0209418	0.0570982	-0.0524702	-0.0181071	0.0094296	-0.0451811	0.0182807	-0.0137105	-0.0414208	0.0210575	0.0277103	-0.0458174	-0.00601643	0.0321648	0.00775194	0.0272475	0.0138841
Bacillus_cereus_E33L_uid58103|recQ	0.662083	-0.0200809	0.0159289	0.0145887	-0.0350567	-0.0100459	0.00222391	-0.0202453	0.00859985	-0.0339977	0.0166702	0.0339174	4.74726e-05	0.0314817	0.00158851	-0.0136575	-0.0136575	-0.00706977	0.0117878	-0.0079754	0.0249523
Bacillus_cereus_E33L_uid58103|fni	2.61958	0.0128657	-0.0140361	-0.00155777	-0.0190403	-0.00146091	0.00344647	-0.0294362	0.0118003	-0.0329795	0.0145688	0.00708665	-0.0160297	0.026127	-0.00534323	-0.0102022	0.0203963	0.0351104	-0.00553695	0.00383389	0.000387425
Bacillus_cereus_E33L_uid58103|moaA	-0.692983	-0.00462588	-0.00953152	-0.0212911	-5.99466e-05	0.0181439	0.0108404	-0.00919182	-0.0352686	-0.0141574	0.00650421	0.0167151	-0.00896202	0.0154063	-0.0174645	0.0256771	0.0371469	0.0070737	0.00256771	-0.0218605	0.00233792
Bacillus_cereus_E33L_uid58103|argS	1.07533	-0.00483508	0.00362159	0.00971417	-0.00143984	0.0057279	0.0234083	-0.017278	0.00543868	0.000603599	-0.0140085	0.00420004	-0.0261371	0.0178816	0.00728091	-0.00851955	-0.0121537	0.00208116	0.00892195	-0.00655156	0.00204343
Bacillus_cereus_E33L_uid58103|ileS	2.64473	0.0184314	-0.00095682	-0.00184155	-0.00768264	0.00198666	-0.000930605	-0.0444556	0.00970114	-0.0270091	-0.00869002	0.0213665	-0.0115595	0.0164756	3.46402e-05	5.52371e-05	0.0097105	0.00682787	-0.00481499	0.0213712	0.00198011
Bacillus_cereus_E33L_uid58103|moaA	-0.692983	-0.00462588	-0.00953152	-0.0212911	-5.99466e-05	0.0181439	0.0108404	-0.00919182	-0.0352686	-0.0141574	0.00650421	0.0167151	-0.00896202	0.0154063	-0.0174645	0.0256771	0.0371469	0.0070737	0.00256771	-0.0218605	0.00233792
Bacillus_cereus_E33L_uid58103|nrdD	1.36889	0.0056235	0.00804859	-0.00319001	-0.013773	0.0192073	0.0112008	-0.00344639	0.0047493	-0.0255243	0.00606901	-0.00902366	-0.000508553	0.0193334	0.00606901	0.000449712	0.00666583	-0.00340436	-0.00521582	-0.011516	-0.0118144
Bacillus_cereus_E33L_uid58103|glnA	-0.571433	-0.0153214	-0.00443381	-0.00636287	0.0092716	-0.00869592	-0.00873631	0.00250475	0.0045954	-0.019937	0.00684765	0.0295823	0.0114633	0.00684765	-0.00200986	-0.013261	0.0159173	0.000191896	-0.00219165	-0.0109078	0.0046358
Bacillus_cereus_E33L_uid58103|ftsY	5.33547	0.0224152	0	-0.00871566	0.00457807	0.00240535	0.00895323	-0.0309874	0.0111458	-0.0264242	0.00900767	-0.00643405	-0.0110616	0.013467	-0.00215293	-0.0243801	0.0178768	0.00456818	0	0.0312843	-0.0155457
Bacillus_cereus_E33L_uid58103|ftsY	5.33547	0.0224152	0	-0.00871566	0.00457807	0.00240535	0.00895323	-0.0309874	0.0111458	-0.0264242	0.00900767	-0.00643405	-0.0110616	0.013467	-0.00215293	-0.0243801	0.0178768	0.00456818	0	0.0312843	-0.0155457
Bacillus_cereus_E33L_uid58103|sun	4.28372	0.0366531	-0.00243737	0.0067259	0.00826854	0.0185425	-0.0231704	-0.0181414	0.0190979	-0.0147168	-0.00712699	0.00311613	-0.0505677	0.0256695	0.000617055	-0.00974948	0.0185425	-0.0189436	0.00900901	0.00465877	-0.00604714
Bacillus_cereus_E33L_uid58103|pyrE	3.47433	-0.0147147	0.00570571	0.0193694	-0.00435435	0.0184685	0.016967	-0.0201201	0.0166667	-0.0354354	0.0112613	0.0306306	-0.0533033	0.0226727	0.0115616	-0.00960961	0.0117117	0.00735736	0.00555556	-0.0301802	-0.0102102
Bacillus_cereus_E33L_uid58103|ileS	2.64473	0.0184314	-0.00095682	-0.00184155	-0.00768264	0.00198666	-0.000930605	-0.0444556	0.00970114	-0.0270091	-0.00869002	0.0213665	-0.0115595	0.0164756	3.46402e-05	5.52371e-05	0.0097105	0.00682787	-0.00481499	0.0213712	0.00198011
Bacillus_cereus_E33L_uid58103|alaS	1.06519	0.0232835	-0.00727472	-0.00600635	-0.026093	0.00479799	-0.00088104	-0.000425518	0.0123809	-0.00696104	0.00229125	0.0139821	0.00644278	0.0341124	-0.00238399	-0.014334	-0.0100406	0.0173208	-0.000166388	-0.0273804	-0.0126646
Bacillus_cereus_E33L_uid58103|spoVB	8.54015	0.0496727	-0.000874568	0.0138428	-0.0116427	-0.0135558	-0.0172317	-0.0229984	0.0134875	-0.0246792	0.00911464	0.00204977	-0.0361579	0.0338075	0.00394922	-0.0370188	0.020935	0.0315391	-0.0056027	0.0100029	-0.0186392
Bacillus_cereus_E33L_uid58103|pheA	5.84237	0.0425742	-0.0153209	-0.000619693	-0.0169031	0.0042983	-0.0204367	-0.0257502	0.0347424	-0.029086	0.0172723	0.0060519	-0.0400823	0.00607827	0.0158879	-0.0137651	0.00921629	0.0227572	0.00313802	0.0027161	-0.00276884
Bacillus_cereus_E33L_uid58103|hemA	5.57515	0.0167917	-0.00408	0.011615	-0.0185133	0.00803028	-0.00584878	-0.0228999	0.00231121	-0.0401278	0.00797132	0.0295741	-0.0455403	0.0199637	0.00906797	0.00845479	0.00577803	0.0166737	0.00152115	0.0081482	-0.00889109
Bacillus_cereus_E33L_uid58103|pheT	7.07436	0.0502952	-0.0028218	-0.00464925	-0.0106153	0.0167919	-0.0146733	-0.0478451	0.00180058	-0.0195331	0.00563464	-0.00137507	-0.0285494	0.0122905	-0.00971056	0.0038251	0.010257	0.00596608	0.00191703	0.0264891	0.00450592
Bacillus_cereus_E33L_uid58103|glyS	5.39181	0.00276159	0.00397121	-0.0110616	-0.000699907	-0.000699907	0.0224122	-0.029921	0.00222905	-0.0189812	0.00705993	0.00280724	0.00185628	0.0114039	0.00838367	0.00448093	0.000578184	0.0110311	0.012682	-0.0181672	-0.0121267
Bacillus_cereus_E33L_uid58103|trxB	-2.35365	-0.0245952	-0.00844689	0.0102426	-0.00785048	-1.29653e-05	0.0168873	-0.0261056	0.0241284	-0.00574362	-0.0190071	0.0361861	0.0256324	0.014022	-0.0200638	0.0303064	0.00542597	-0.0185598	0.00120577	-0.0386236	0.00497219
Bacillus_cereus_E33L_uid58103|speE	-1.81398	0.0166376	-0.00615563	-0.0125436	0.00716221	-0.028194	0.000503291	0.000754936	0.00752033	-0.0359466	0.00283585	0.0192412	0.0113434	0.0356078	-0.00577816	0.024158	0.0146632	-0.0244967	0.000987224	-0.0108208	-0.0174797
Bacillus_cereus_E33L_uid58103|argS	1.07533	-0.00483508	0.00362159	0.00971417	-0.00143984	0.0057279	0.0234083	-0.017278	0.00543868	0.000603599	-0.0140085	0.00420004	-0.0261371	0.0178816	0.00728091	-0.00851955	-0.0121537	0.00208116	0.00892195	-0.00655156	0.00204343
Bacillus_cereus_E33L_uid58103|speE	-1.81398	0.0166376	-0.00615563	-0.0125436	0.00716221	-0.028194	0.000503291	0.000754936	0.00752033	-0.0359466	0.00283585	0.0192412	0.0113434	0.0356078	-0.00577816	0.024158	0.0146632	-0.0244967	0.000987224	-0.0108208	-0.0174797
Bacillus_cereus_Q1_uid58529|oppF	5.18627	0.0384799	0.00382953	-0.0207471	0.00309131	0.0105658	0.0113656	-0.0209932	0.0114271	-0.0133342	-0.0237769	-0.0135802	-0.0517525	0.0268682	0.00735147	0.0109349	0.0151336	0.0148875	-6.15186e-05	-0.0169791	0.00728995
Bacillus_cereus_Q1_uid58529|oppF	5.18627	0.0384799	0.00382953	-0.0207471	0.00309131	0.0105658	0.0113656	-0.0209932	0.0114271	-0.0133342	-0.0237769	-0.0135802	-0.0517525	0.0268682	0.00735147	0.0109349	0.0151336	0.0148875	-6.15186e-05	-0.0169791	0.00728995
Bacillus_cereus_Q1_uid58529|purM	4.42459	0.00351127	9.93756e-05	0.0209765	-0.0254402	0.0469632	0.00316346	-0.0193617	-0.00274111	-0.0337877	0.00607847	0.020902	-0.0313199	0.0116601	0.00311377	-0.00540769	0.0117098	0.00323799	0.00289017	-0.0193617	0.00311377
Bacillus_cereus_Q1_uid58529|gatB	0.303653	0.0353047	-0.00860958	0.00718213	0.00137807	0.00127034	0.00815172	-0.00728538	-0.00653125	-0.00334418	-0.0173538	0.0222691	-0.00912131	0.0037796	-0.00693525	0.00790933	-0.00901358	0.0035372	0.0020514	-0.0242083	-0.000430928
Bacillus_cereus_Q1_uid58529|proS	3.63867	0.0258495	0.0165875	-0.00162587	-0.0187797	-0.00197296	-0.00580928	-0.0279868	0.00759956	0.00750822	0.0139752	-0.0284984	0.00310559	0.0310011	-0.00776398	0.00288637	-0.0119657	-0.00624772	0.0122397	0.0104859	-0.0205882
Bacillus_cereus_Q1_uid58529|pyrE	4.21097	-0.0147147	0.00570571	0.00825826	-0.00990991	0.0295796	0.016967	-0.0201201	0.0222222	-0.0298799	0.0112613	0.0306306	-0.0533033	0.0226727	0.0115616	-0.00960961	0.00615616	0.0018018	0.00555556	-0.0246246	-0.0102102
Bacillus_cereus_Q1_uid58529|oppF	5.18627	0.0384799	0.00382953	-0.0207471	0.00309131	0.0105658	0.0113656	-0.0209932	0.0114271	-0.0133342	-0.0237769	-0.0135802	-0.0517525	0.0268682	0.00735147	0.0109349	0.0151336	0.0148875	-6.15186e-05	-0.0169791	0.00728995
Bacillus_cereus_Q1_uid58529|oppF	5.18627	0.0384799	0.00382953	-0.0207471	0.00309131	0.0105658	0.0113656	-0.0209932	0.0114271	-0.0133342	-0.0237769	-0.0135802	-0.0517525	0.0268682	0.00735147	0.0109349	0.0151336	0.0148875	-6.15186e-05	-0.0169791	0.00728995
Bacillus_cereus_Q1_uid58529|oppF	5.18627	0.0384799	0.00382953	-0.0207471	0.00309131	0.0105658	0.0113656	-0.0209932	0.0114271	-0.0133342	-0.0237769	-0.0135802	-0.0517525	0.0268682	0.00735147	0.0109349	0.0151336	0.0148875	-6.15186e-05	-0.0169791	0.00728995
Bacillus_cereus_Q1_uid58529|hisA	4.03237	0.0171878	0.00840292	-0.0076043	-0.00366326	-0.0117537	0.025174	-0.0157294	-0.00411465	-0.0449834	-0.00401049	0.0132468	-0.0288026	0.0168753	-0.0164239	0.00453133	0.0252088	0.0169795	-0.00411465	0.00508689	0.00850709
Bacillus_cereus_Q1_uid58529|cysG	12.8706	0.0504454	-0.00329747	-0.0219831	-0.0209418	0.0609742	-0.0524702	-0.0181071	0.0094296	-0.0413051	0.0144047	-0.0137105	-0.0414208	0.0210575	0.0315863	-0.0458174	-0.0098924	0.0321648	0.00775194	0.0272475	0.0138841
Bacillus_cereus_Q1_uid58529|fni	2.61958	0.0157311	-0.0140361	-0.00728843	-0.016175	-0.00146091	0.00344647	-0.0380322	0.0118003	-0.0329795	0.0145688	0.00708665	-0.0131644	0.0289923	-0.00534323	-0.0130675	0.0203963	0.032245	-0.00553695	0.0124299	0.000387425
Bacillus_cereus_Q1_uid58529|argS	0.66088	-0.00483508	6.28749e-05	0.00793481	-0.00499855	0.0057279	0.0251877	-0.0190574	0.0089974	0.000603599	-0.0140085	0.00420004	-0.0261371	0.0214403	0.00728091	-0.00851955	-0.0121537	-0.00147756	0.00892195	-0.00121349	0.00204343
Bacillus_cereus_Q1_uid58529|ileS	2.48355	0.0184314	-0.00095682	-0.000873496	-0.00768264	0.00101861	-0.000930605	-0.0463917	0.00970114	-0.026041	-0.00772196	0.0213665	-0.0125276	0.0135715	0.00100269	0.00102329	0.0106786	0.00779593	-0.00481499	0.0213712	0.00198011
Bacillus_cereus_Q1_uid58529|nrdD	1.47659	0.00724163	0.00643046	-0.00157189	-0.013773	0.0192073	0.0112008	-0.00344639	0.00313117	-0.0287606	0.00606901	-0.00902366	0.00110957	0.0193334	0.00606901	0.00368596	0.00666583	-0.00340436	-0.00521582	-0.0131341	-0.0118144
Bacillus_cereus_Q1_uid58529|glnA	-0.571433	-0.0153214	-0.00443381	-0.00636287	0.0092716	-0.00869592	-0.0109886	0.00250475	0.0045954	-0.019937	0.00684765	0.0295823	0.0114633	0.00684765	-0.00200986	-0.013261	0.0159173	0.000191896	-0.00219165	-0.0109078	0.00688805
Bacillus_cereus_Q1_uid58529|ftsY	5.70584	0.0224152	0	-0.00871566	0.00457807	0.00240535	0.00895323	-0.0309874	0.0111458	-0.0286513	0.00900767	-0.00643405	-0.0110616	0.0156941	-0.00215293	-0.0243801	0.0178768	0.00456818	0	0.0312843	-0.0155457
Bacillus_cereus_Q1_uid58529|ftsY	5.70584	0.0224152	0	-0.00871566	0.00457807	0.00240535	0.00895323	-0.0309874	0.0111458	-0.0286513	0.00900767	-0.00643405	-0.0110616	0.0156941	-0.00215293	-0.0243801	0.0178768	0.00456818	0	0.0312843	-0.0155457
Bacillus_cereus_Q1_uid58529|sun	4.43354	0.0389053	-0.00243737	0.00447365	0.00601629	0.023047	-0.0254227	-0.0136369	0.0190979	-0.0147168	-0.00937924	0.00536838	-0.0505677	0.0256695	0.000617055	-0.00974948	0.0185425	-0.0211959	0.00900901	0.00240652	-0.00604714
Bacillus_cereus_Q1_uid58529|pyrE	4.21097	-0.0147147	0.00570571	0.00825826	-0.00990991	0.0295796	0.016967	-0.0201201	0.0222222	-0.0298799	0.0112613	0.0306306	-0.0533033	0.0226727	0.0115616	-0.00960961	0.00615616	0.0018018	0.00555556	-0.0246246	-0.0102102
Bacillus_cereus_Q1_uid58529|ileS	2.48355	0.0184314	-0.00095682	-0.000873496	-0.00768264	0.00101861	-0.000930605	-0.0463917	0.00970114	-0.026041	-0.00772196	0.0213665	-0.0125276	0.0135715	0.00100269	0.00102329	0.0106786	0.00779593	-0.00481499	0.0213712	0.00198011
Bacillus_cereus_Q1_uid58529|alaS	2.11697	0.0159842	-0.00727472	-0.00843944	-0.0236599	-6.8192e-05	-0.00088104	-0.00285861	0.0172471	-0.0142603	-0.000141839	0.011549	0.011309	0.0316793	-0.00238399	-0.00946778	-0.00517441	0.0197539	-0.000166388	-0.0176481	-0.0150977
Bacillus_cereus_Q1_uid58529|spoVB	8.09144	0.0477459	-0.000874568	0.0138428	-0.0116427	-0.0135558	-0.0172317	-0.026852	0.0134875	-0.0246792	0.00911464	0.00397655	-0.0361579	0.0338075	0.00394922	-0.0389456	0.020935	0.0334659	-0.0056027	0.0138564	-0.0186392
Bacillus_cereus_Q1_uid58529|pheA	5.37288	0.0425742	-0.0153209	-0.000619693	-0.0169031	0.000764728	-0.0204367	-0.0257502	0.0347424	-0.029086	0.0172723	0.0060519	-0.0400823	0.00607827	0.00882074	-0.00316439	0.00921629	0.0227572	0.00313802	0.0027161	-0.00276884
Bacillus_cereus_Q1_uid58529|hemA	5.12571	0.0167917	-0.00408	0.011615	-0.0185133	0.00803028	-0.00584878	-0.0251521	0.00231121	-0.0401278	0.00797132	0.0273218	-0.0477926	0.0222159	0.00906797	0.00845479	0.00352578	0.018926	0.00152115	0.0126527	-0.00889109
Bacillus_cereus_Q1_uid58529|pheT	7.15697	0.0515359	-0.0028218	-0.00340855	-0.011856	0.0167919	-0.0146733	-0.0466044	0.00180058	-0.0195331	0.00439394	-0.00137507	-0.0285494	0.0122905	-0.00971056	0.00258441	0.010257	0.00472539	0.00191703	0.0277298	0.00450592
Bacillus_cereus_Q1_uid58529|glyS	5.39181	0.00276159	0.00397121	-0.0110616	-0.000699907	-0.000699907	0.0224122	-0.029921	0.00222905	-0.0189812	0.00705993	0.00280724	0.00185628	0.0114039	0.00838367	0.00448093	0.000578184	0.0110311	0.012682	-0.0181672	-0.0121267
Bacillus_cereus_Q1_uid58529|trxB	-2.35365	-0.0245952	-0.00844689	0.0102426	-0.0107158	-1.29653e-05	0.0197526	-0.0232403	0.0269937	-0.00287829	-0.0190071	0.0361861	0.0227671	0.0168873	-0.0171985	0.027441	0.00542597	-0.0214251	0.00120577	-0.0414889	0.00210686
Bacillus_cereus_Q1_uid58529|argS	0.66088	-0.00483508	6.28749e-05	0.00793481	-0.00499855	0.0057279	0.0251877	-0.0190574	0.0089974	0.000603599	-0.0140085	0.00420004	-0.0261371	0.0214403	0.00728091	-0.00851955	-0.0121537	-0.00147756	0.00892195	-0.00121349	0.00204343
Bacillus_cereus_Q1_uid58529|speE	-1.87625	0.0151012	-0.0064117	-0.0148481	0.00468691	-0.0265936	-0.00873641	0.00395576	0.0117454	-0.0167417	0.00503375	0.0102362	0.0096363	0.0387233	-0.00705849	0.0189726	0.0136389	-0.0284871	0.000731159	-0.00770529	-0.0158793
Bacillus_megaterium_DSM319_uid48371|purM	5.98073	0.0124247	0.000132885	0.0125908	-0.0137287	0.0473402	0.0119596	-0.0278228	-0.00269922	-0.0364852	-0.0024999	0.00379552	-0.0254558	0.0117271	0.00609609	-0.00240023	0.00309788	0.00336365	0.00289855	-0.01333	0.00899464
Bacillus_megaterium_DSM319_uid48371|glyS	4.06036	0.00468868	0.00171186	-0.0158461	0.00336313	-0.00315861	0.00903651	-0.0236176	0.00866535	-0.019285	0.00473413	0.000310559	0.00818815	0.0177928	0.00168156	0.00644599	-0.00400697	0.0151416	0.0125966	-0.0248977	-0.00354492
Bacillus_megaterium_DSM319_uid48371|gatB	1.3435	0.0393516	-0.00862285	0.00696099	0.00335507	0.00533049	0.0164932	-0.00953217	-0.00655337	-0.0140474	-0.0174025	0.0262762	-0.00501693	-0.00470337	-0.00912455	0.0183118	-0.000689828	-0.00918726	0.00203813	-0.0285338	-0.00470337
Bacillus_megaterium_DSM319_uid48371|speE	0.708538	-0.00502421	-0.000726392	-0.0416465	0.00653753	0.013862	-0.0123487	0.0306295	-0.00127119	-0.014891	0.0130145	-0.0322034	-0.0157385	0.0220944	0.0145884	0.00387409	0.0092615	-0.01023	0.0131961	-0.000605327	0.00762712
Bacillus_megaterium_DSM319_uid48371|ileS	10.4898	0.0175187	-0.00191549	-0.00853163	-0.00665924	0.00785315	7.49704e-05	-0.0473307	0.0107001	-0.0191868	-0.0106139	0.0166116	-0.0153895	0.0262003	0.00200733	-0.000858411	0.00587393	-0.000865908	-0.00576335	0.0311558	-0.000880902
Bacillus_megaterium_DSM319_uid48371|glnA	-0.796152	-0.0220781	-0.00443381	0.0048984	0.0092716	-0.00869592	0.000272694	0.00250475	0.0045954	-0.010928	0.00909991	0.0138165	0.0047065	0.00684765	-0.00200986	-0.013261	0.0159173	0.00244415	-0.00444391	-0.0109078	0.00238355
Bacillus_megaterium_DSM319_uid48371|ffh	5.95882	0.0272782	0	-0.0128412	0.00260999	-0.00841163	0.0113199	-0.0374497	0.00897837	-0.0326473	0.00253542	-0.00372856	0.00469799	0.00926174	-0.00425056	-0.0108277	0.0203132	-0.00189411	0	0.0383445	-0.0132886
Bacillus_megaterium_DSM319_uid48371|ftsY	6.04618	0.0138688	0.00301205	0.00971888	0.0137216	-0.00771084	0.0191566	-0.0264257	0.00157965	-0.0421821	-0.0263722	-0.0207497	0.00281124	0.00453815	-0.015261	-0.00815261	0.01249	0.00912985	0.00301205	0.058755	-0.00493976
Bacillus_megaterium_DSM319_uid48371|pyrE	8.2513	0.0287863	0.00874554	-0.00295767	-0.00550739	-0.00354411	0.0174911	-0.00963794	0.0141509	-0.0347017	0.0134625	-0.017797	-0.0480622	0.0262366	0.0215196	0.0072667	0.00668027	-0.00826109	0.0188679	-0.0380418	0.00530342
Bacillus_megaterium_DSM319_uid48371|ileS	10.4898	0.0175187	-0.00191549	-0.00853163	-0.00665924	0.00785315	7.49704e-05	-0.0473307	0.0107001	-0.0191868	-0.0106139	0.0166116	-0.0153895	0.0262003	0.00200733	-0.000858411	0.00587393	-0.000865908	-0.00576335	0.0311558	-0.000880902
Bacillus_megaterium_DSM319_uid48371|fni	4.97829	0.00973843	-0.0169014	0.00108652	-0.0162978	0.00973843	0.00334004	-0.0239839	0.025996	-0.038833	0.0202012	-0.00744467	-0.0247485	0.0317103	-0.00539235	-0.00466801	0.0288531	0.00917505	-0.00555332	0.0179477	-0.0139638
Bacillus_megaterium_DSM319_uid48371|recQ	7.97096	0.00054638	0.0159731	0.0162162	-0.0265295	-0.0073905	0.00175417	-0.0310521	0.00808589	-0.0268327	0.0128072	0.0147601	-0.00578012	0.0293816	0.0072807	-0.000308482	-0.0185926	-0.00191364	0.00281294	-0.00221689	0.0109982
Bacillus_megaterium_DSM319_uid48371|alaS	5.62487	0.037255	-0.010013	-0.00739629	-0.00230862	0.014891	0.00397682	-0.0202842	0.00370837	-0.0269723	-0.00638131	-0.00777978	0.00764684	0.0141816	0.00049854	-0.00263459	0.00751262	-0.00352557	-0.00206958	0.0116045	-0.01191
Bacillus_megaterium_DSM319_uid48371|pheA	7.06447	0.0227741	-0.0016984	0.000952136	-0.0143078	0.020175	-0.0212043	-0.00306227	0.0508749	-0.0407102	0.0166752	0.0176274	-0.0550695	0.0123778	0.0215903	-0.0148739	0.0014668	0.0213073	-0.000566135	-0.0165723	-0.017756
Bacillus_megaterium_DSM319_uid48371|hemA	6.30175	0.020872	-0.0086047	0.00889818	-0.0254619	0.0123025	-0.00376822	-0.0254854	0.011199	-0.0404409	-0.00113868	0.0290893	-0.0321884	0.0310027	0.00447257	0.0149086	0.00109173	0.00968469	-0.000751297	0.00106825	-0.00674994
Bacillus_megaterium_DSM319_uid48371|lysC	5.84599	0.0310194	-0.00580571	-0.00468001	-0.00737961	-0.0171774	-0.0143736	-0.0342714	0.00455493	-0.0263081	0.00118824	0.00600375	-0.0122577	0.03596	-0.00887013	0.00296018	0.00513863	0.0163852	0.000302272	0.0209193	0.00669168
Bacillus_megaterium_DSM319_uid48371|pheT	10.0726	0.048036	-0.00405015	-0.0118496	-0.00303536	0.0182301	-0.0232996	-0.051453	0.000606175	-0.0367701	-0.00424771	-0.00114051	-0.0234971	0.0210679	-0.0133493	0.0101613	0.0252842	-0.00259533	0.00441385	0.0416644	0.00582377
Bacillus_megaterium_DSM319_uid48371|tpiA	3.35705	0.0288326	-0.00140479	0.00891233	0.00734634	-0.00124358	0.0318725	-0.0349124	-0.00538885	-0.00382286	0.00257928	-0.0403012	-0.0237432	0.0460125	-0.0201506	-0.0113995	-0.00499735	0.00773783	0.00796813	-0.0120213	0.018124
Bacillus_megaterium_DSM319_uid48371|hisA	8.56468	0.0690089	-5.10169e-05	-0.0175158	0.00743147	0.0193184	0.0203898	-0.0465615	-0.00420039	-0.0384158	0.00794164	-0.0174138	-0.0335011	0.00389429	-0.020951	0.00768655	0.0203388	0.0201347	-0.000102034	-0.0177199	0.0202877
Bacillus_megaterium_DSM319_uid48371|argS	4.75198	0.0282495	-0.0052368	-0.0285101	0.0152465	0.00997788	-0.00289803	-0.0112871	0.00924702	-0.00566896	-0.00662226	-0.00737219	-0.0309759	0.0343951	0.000413097	-0.00084526	-0.00283448	0.00435976	0.00186211	-0.0129585	0.0114587
Bacillus_megaterium_DSM319_uid48371|speE	0.708538	-0.00502421	-0.000726392	-0.0416465	0.00653753	0.013862	-0.0123487	0.0306295	-0.00127119	-0.014891	0.0130145	-0.0322034	-0.0157385	0.0220944	0.0145884	0.00387409	0.0092615	-0.01023	0.0131961	-0.000605327	0.00762712
Bacillus_megaterium_QM_B1551_uid15862|purM	5.78805	0.00952618	0.000132885	0.0154894	-0.0137287	0.0473402	0.0119596	-0.0278228	0.000199327	-0.0393837	-0.0024999	0.00379552	-0.0254558	0.00882854	0.00609609	0.000498318	0.00309788	0.00336365	0.00289855	-0.01333	0.00899464
Bacillus_megaterium_QM_B1551_uid15862|glyS	4.56651	0.00468868	0.00171186	-0.0158461	0.00336313	-0.00315861	0.00903651	-0.0236176	0.00866535	-0.019285	0.00473413	0.000310559	0.00818815	0.0177928	0.00168156	0.00644599	-0.00400697	0.0151416	0.0125966	-0.0248977	-0.00354492
Bacillus_megaterium_QM_B1551_uid15862|gatB	0.994097	0.0393516	-0.00862285	0.00696099	0.00335507	0.00533049	0.0164932	-0.00953217	-0.00655337	-0.0140474	-0.0174025	0.0262762	-0.00501693	-0.00470337	-0.00912455	0.0183118	-0.000689828	-0.00918726	0.00203813	-0.0285338	-0.00470337
Bacillus_megaterium_QM_B1551_uid15862|oppF	9.48747	0.0372671	0.00254094	-0.00832863	0.00381141	0.00352908	0.0159514	-0.0241389	0.0166573	-0.0385375	-0.00169396	-0.0348673	-0.0393845	0.00875212	0.0177866	0.0142575	0.0405138	0.0149633	-0.00395257	-0.0324675	0.00734049
Bacillus_megaterium_QM_B1551_uid15862|speE	1.38421	-0.00502421	-0.000726392	-0.0416465	0.00653753	0.0172518	-0.0123487	0.0272397	-0.00127119	-0.0115012	0.0130145	-0.0322034	-0.0191283	0.0153148	0.0111985	0.00726392	0.0092615	-0.00684019	0.0131961	-0.000605327	0.0110169
Bacillus_megaterium_QM_B1551_uid15862|ileS	10.4044	0.0185441	-0.000936163	-0.0123249	-0.003694	0.00985128	0.0010825	-0.0482715	0.00976123	-0.0258983	-0.00963178	0.018637	-0.0134074	0.0252745	0.00204399	-0.000803899	0.00978937	0.00112471	-0.00574361	0.0264105	-0.0018076
Bacillus_megaterium_QM_B1551_uid15862|glnA	-0.871059	-0.0220781	-0.00443381	0.0048984	0.0092716	-0.00869592	0.000272694	0.004757	0.0045954	-0.010928	0.00909991	0.0138165	0.0047065	0.00684765	-0.00200986	-0.013261	0.0159173	0.00244415	-0.00444391	-0.01316	0.00238355
Bacillus_megaterium_QM_B1551_uid15862|ffh	6.03322	0.0272782	0	-0.0128412	0.00260999	-0.00841163	0.0113199	-0.0374497	0.00897837	-0.0326473	0.00253542	-0.00372856	0.00469799	0.00926174	-0.00425056	-0.0108277	0.0203132	-0.00189411	0	0.0383445	-0.0132886
Bacillus_megaterium_QM_B1551_uid15862|ftsY	5.74588	0.0138688	0.00301205	0.00971888	0.0137216	-0.00771084	0.0191566	-0.0264257	0.00157965	-0.0421821	-0.0263722	-0.0207497	0.00281124	0.00453815	-0.015261	-0.00815261	0.01249	0.00912985	0.00301205	0.058755	-0.00493976
Bacillus_megaterium_QM_B1551_uid15862|pyrE	9.19027	0.0287863	0.00874554	0.00175931	-0.0102244	-0.00354411	0.0174911	-0.00963794	0.0141509	-0.0347017	0.0134625	-0.017797	-0.0480622	0.0262366	0.0215196	0.0072667	0.00668027	-0.00826109	0.0188679	-0.0380418	0.00530342
Bacillus_megaterium_QM_B1551_uid15862|ileS	10.4044	0.0185441	-0.000936163	-0.0123249	-0.003694	0.00985128	0.0010825	-0.0482715	0.00976123	-0.0258983	-0.00963178	0.018637	-0.0134074	0.0252745	0.00204399	-0.000803899	0.00978937	0.00112471	-0.00574361	0.0264105	-0.0018076
Bacillus_megaterium_QM_B1551_uid15862|fni	4.69339	0.00973843	-0.0169014	0.00108652	-0.0162978	0.00973843	0.00334004	-0.026841	0.0231388	-0.038833	0.0202012	-0.00744467	-0.0247485	0.0345674	-0.00539235	-0.00466801	0.0288531	0.00917505	-0.00555332	0.0208048	-0.0139638
Bacillus_megaterium_QM_B1551_uid15862|recQ	7.59643	-0.00086009	0.0159731	0.0134033	-0.025123	-0.00598403	0.00316064	-0.0324586	0.0108988	-0.0268327	0.0128072	0.0147601	-0.00578012	0.0293816	0.0072807	-0.00171495	-0.0199991	-0.00191364	0.00281294	-0.000810419	0.0109982
Bacillus_megaterium_QM_B1551_uid15862|alaS	5.32115	0.037255	-0.010013	-0.00853654	-0.00230862	0.014891	0.00397682	-0.0191439	0.00370837	-0.0258321	-0.00638131	-0.00777978	0.00878709	0.0141816	0.00049854	-0.00263459	0.00751262	-0.00580608	-0.00206958	0.0116045	-0.01191
Bacillus_megaterium_QM_B1551_uid15862|pheA	6.72083	0.0193258	-0.0016984	-0.00249614	-0.017756	0.0236233	-0.0212043	-0.00306227	0.0508749	-0.0338137	0.0166752	0.0176274	-0.0516212	0.0123778	0.0215903	-0.0148739	-0.00198147	0.0213073	-0.000566135	-0.0165723	-0.017756
Bacillus_megaterium_QM_B1551_uid15862|hemA	6.37633	0.0231141	-0.0086047	0.00889818	-0.0254619	0.0123025	-0.00376822	-0.0254854	0.011199	-0.0404409	-0.00113868	0.0290893	-0.0321884	0.0310027	0.00447257	0.0126664	0.00109173	0.00968469	-0.000751297	0.00106825	-0.00674994
Bacillus_megaterium_QM_B1551_uid15862|lysC	6.33261	0.0310194	-0.00336669	0.00019804	-0.00981864	-0.0171774	-0.0143736	-0.0342714	0.00455493	-0.0287471	0.00118824	0.00600375	-0.0122577	0.03596	-0.00887013	0.00296018	0.00513863	0.0163852	0.000302272	0.0209193	0.00425266
Bacillus_megaterium_QM_B1551_uid15862|pheT	10.2796	0.048036	-0.00405015	-0.0130934	-0.00427915	0.0219615	-0.0232996	-0.051453	0.000606175	-0.0367701	-0.00424771	0.000103274	-0.0247409	0.0210679	-0.0133493	0.0101613	0.0240404	-0.00259533	0.00441385	0.0416644	0.00582377
Bacillus_megaterium_QM_B1551_uid15862|tpiA	3.6216	0.0288326	-0.00140479	0.0128964	0.00336227	-0.00124358	0.0318725	-0.0349124	-0.00538885	-0.00382286	0.00257928	-0.0403012	-0.0237432	0.0460125	-0.0201506	-0.0113995	-0.00499735	0.00773783	0.00796813	-0.0120213	0.018124
Bacillus_megaterium_QM_B1551_uid15862|hisA	8.56468	0.0690089	-5.10169e-05	-0.0175158	0.00743147	0.0193184	0.0203898	-0.0465615	-0.00420039	-0.0384158	0.00794164	-0.0174138	-0.0335011	0.00389429	-0.020951	0.00358819	0.0203388	0.024233	-0.000102034	-0.0177199	0.0202877
Bacillus_megaterium_QM_B1551_uid15862|argS	4.81183	0.0318466	-0.0052368	-0.0285101	0.0152465	0.00997788	-0.00289803	-0.00948852	0.00924702	-0.00746752	-0.0048237	-0.00737219	-0.0309759	0.0361937	0.000413097	-0.00084526	-0.00283448	0.000762641	0.00186211	-0.0165557	0.0114587
Bacillus_megaterium_QM_B1551_uid15862|speE	1.38421	-0.00502421	-0.000726392	-0.0416465	0.00653753	0.0172518	-0.0123487	0.0272397	-0.00127119	-0.0115012	0.0130145	-0.0322034	-0.0191283	0.0153148	0.0111985	0.00726392	0.0092615	-0.00684019	0.0131961	-0.000605327	0.0110169
Bacillus_pseudofirmus_OF4_uid45847|purM	12.1836	-0.0018658	0.000166589	-0.0132855	-0.00485607	0.0564403	0.00627207	-0.045054	0.00606384	-0.0595472	0.0092207	0.0185663	-0.0282785	0.00307357	0.0149097	0.0122526	0.0147848	0.00930399	0.00290698	-0.0043563	0.0032818
Bacillus_pseudofirmus_OF4_uid45847|gatB	5.76584	0.0184626	-0.00650432	0.0113927	0.0055886	0.00758613	0.0144675	-0.00728538	-0.00863652	-0.00123892	-0.0173538	0.0201638	-0.00912131	-0.000430928	-0.00693525	0.0142251	-0.00480305	-0.00698911	-5.3866e-05	-0.0242083	0.00167434
Bacillus_pseudofirmus_OF4_uid45847|pheA	7.4952	0.0293507	0.00166692	-0.019939	-0.000692414	-0.00412884	-0.0178745	-0.0170924	0.0300431	-0.0236703	0.0200287	0.00696261	-0.0483151	0.019144	0.0282736	0.0055906	-0.00550085	0.0279787	-0.00402626	-0.0167975	-0.0110017
Bacillus_pseudofirmus_OF4_uid45847|spoVB	13.1511	0.0565251	-0.00281609	0.0116802	-0.00789227	-0.0101885	-0.0253809	-0.0276772	0.00956023	-0.0192967	0.0184243	-0.00473265	-0.034349	0.0220405	0.00750806	-0.0394614	0.0245085	0.0271845	-0.00754422	0.0265924	-0.0246848
Bacillus_pseudofirmus_OF4_uid45847|alaS	6.74259	0.024554	-0.011161	0.00376753	-0.00927726	0.0215224	0.00503145	-0.02611	0.00366167	-0.030528	-0.00529036	-0.00225236	-0.00499191	0.00611937	0.00384405	0.00978104	0.00740625	-0.00137998	-0.00323059	0.0182255	-0.00969176
Bacillus_pseudofirmus_OF4_uid45847|recQ	4.25685	-0.0122224	0.0198582	0.0106594	-0.0370213	-0.0139752	-0.00367	-0.0320331	0.0125291	-0.0320331	0.0205995	0.0378466	4.74726e-05	0.0354109	-0.00627004	0.00598885	-0.0215161	-0.00117586	0.0117878	-0.0119047	0.0170938
Bacillus_pseudofirmus_OF4_uid45847|dcd	6.6891	0.0104218	-0.0186221	0.021639	-0.0179091	0.00468981	-0.00334595	0.028084	0.00318139	-0.0405902	-0.00891339	0.0627777	-0.0130547	0.00556744	0.027371	-0.0316768	0.0209259	0.0321431	0.000795349	-0.0534803	-0.0300038
Bacillus_pseudofirmus_OF4_uid45847|selD	7.81028	0.0318885	-0.0185468	0.0100135	-0.0303502	-0.00535023	-0.0276606	-0.0211204	0.00327012	-0.0458882	-0.00286378	0.0132837	-0.0338526	0.0250871	0.0283572	0.0191273	0.0157701	0.0253773	-0.0092589	0.0162926	0.00642415
Bacillus_pseudofirmus_OF4_uid45847|glnA	1.73652	-0.0273852	-0.00678638	0.00609726	0.0152007	-0.00491875	-0.00931317	-0.0026017	0.00654669	-0.0138574	0.0176825	0.0129136	-0.00698113	-0.002362	0.0107763	-0.00928321	0.0131383	0.0108512	-0.00231706	-0.00943302	0.00203242
Bacillus_pseudofirmus_OF4_uid45847|ffh	6.76544	0.017414	0	-0.0136578	0.0130285	-0.00477876	0.00876106	-0.0402065	0.00440511	-0.0249361	0.0197148	-0.013766	-0.000147493	0.00643068	-0.000147493	-0.0179351	0.0175811	0.00641101	0	0.0351917	-0.0133628
Bacillus_pseudofirmus_OF4_uid45847|ftsY	6.8236	0.00462462	0.003003	0.0124324	0.0255255	-0.00492492	0.016036	-0.0266066	0.00456456	-0.0424625	-0.0204204	-0.012012	-0.0003003	-0.00162162	-0.0153153	-0.0233033	0.00936937	0.020961	0.003003	0.0554354	-0.00798799
Bacillus_pseudofirmus_OF4_uid45847|pyrE	10.7844	0.0403067	-0.000597713	-0.0155665	2.59875e-05	0.0120582	0.0180353	-0.00356029	0.00961538	-0.0522089	0.0138254	-0.0113565	-0.0426195	0.00301455	0.0222453	0.0324844	0.00722453	0.00725052	0.0192308	-0.0462058	-0.0132017
Bacillus_pseudofirmus_OF4_uid45847|ileS	6.01867	0.0309236	0.000338124	-0.0140741	0.00457412	0.0107507	-0.0028541	-0.0328526	0.0102109	-0.032295	0.00176202	0.00769494	-0.0188205	0.0143167	0.00764769	-0.0049427	0.0124833	0.00326888	-0.00222511	0.0104598	-0.0063666
Bacillus_pseudofirmus_OF4_uid45847|hypF	7.79062	0.00850637	0.00363797	-0.0201612	-0.0146934	0.0173457	-0.00679144	-0.0345083	0.0267845	-0.0176338	0.0113801	0.00671652	-0.0431878	0.0242171	0.0176254	-0.00327334	0.00480179	-0.00170993	0.00512147	0.0149382	0.000884103
Bacillus_pseudofirmus_OF4_uid45847|hypB	6.51852	0.0152275	-0.00872472	-0.00770548	-0.0296192	-0.0121698	0.000815395	-0.0384459	-0.0309442	-0.0338796	0.000509622	0.0336962	-0.0257665	0.0414017	0.0186725	0.0232387	0.027703	0.019386	0.00913242	-0.0164302	0.0139025
Bacillus_pseudofirmus_OF4_uid45847|hemA	10.291	0.0312767	-0.00655306	0.00815568	-0.0092393	0.00430597	-0.00266913	-0.034117	0.0147943	-0.0424095	0.00258358	0.0282198	-0.041919	0.027427	0.00825834	-0.00878304	0.0195565	0.0147601	0.00130035	0.0012148	-0.0161631
Bacillus_pseudofirmus_OF4_uid45847|lysC	5.36543	0.0349313	-0.00343738	0.011427	-0.000557414	-0.0130063	-0.0121702	-0.0445931	0.00436641	-0.0219249	0.0130063	0.00520253	-0.0126347	0.0185805	-0.00659606	-0.00501672	-0.00250836	0.0083612	-0.00213675	0.0222036	0.00650316
Bacillus_pseudofirmus_OF4_uid45847|tpiA	6.2671	0.0368008	-0.00140479	0.0208645	0.00336227	-0.00522764	0.0318725	-0.0349124	-0.00140479	0.00414527	0.00656334	-0.0482694	-0.00382286	0.0221081	-0.0201506	-0.0113995	-0.00101329	-0.00819842	0.00796813	-0.0120213	0.01414
Bacillus_pseudofirmus_OF4_uid45847|hisA	13.7152	0.0658928	-1.71462e-05	-0.00450945	0.0121395	0.0078701	0.0206269	-0.0583485	0.0123624	-0.0707623	-8.57309e-05	-0.00447516	-0.0250334	0.00819588	-0.0166832	0.00396077	0.0288742	0.0205411	-3.42924e-05	-0.0169747	0.0164603
Bacillus_pseudofirmus_OF4_uid45847|argS	7.68436	0.0318466	-0.0052368	-0.0249129	0.0260378	0.00817932	-0.00289803	-0.0184813	0.0056499	-0.0110646	-0.00122658	-0.00917076	-0.0363716	0.0361937	0.00221166	0.00634898	0.0025612	-0.00463304	0.00186211	-0.0165557	0.00966012
Bacillus_pseudofirmus_OF4_uid45847|speE	4.65814	0.026039	-0.0142857	0.00883117	0.0012987	0.0011039	0.0153247	-0.0061039	0.015	-0.0128571	0.0147403	-0.0272727	-0.0246753	-0.00668831	0.000844156	-0.0207792	0.0185065	0.00487013	0.00376623	0.0196104	-0.0172727
Bacillus_thuringiensis_Al_Hakam_uid58795|spoVB	5.9931	0.0263019	0.00465273	0.0167347	0.00123748	0.0130179	-0.00206689	-0.0128006	0.00750469	-0.0127606	0.0213875	-0.0128006	-0.0327598	0.0234145	-0.010095	-0.0275837	0.0238269	0.00532691	-0.00382775	0.000372573	-0.0290829
Bacillus_thuringiensis_Al_Hakam_uid58795|oppF	6.47826	0.0384799	0.00382953	-0.0246382	0.00309131	0.0144569	0.0113656	-0.0171022	0.0114271	-0.0250073	-0.0198859	-0.0135802	-0.0517525	0.0268682	0.00735147	0.0109349	0.0190246	0.0226696	-6.15186e-05	-0.0247612	0.00728995
Bacillus_thuringiensis_Al_Hakam_uid58795|oppF	6.47826	0.0384799	0.00382953	-0.0246382	0.00309131	0.0144569	0.0113656	-0.0171022	0.0114271	-0.0250073	-0.0198859	-0.0135802	-0.0517525	0.0268682	0.00735147	0.0109349	0.0190246	0.0226696	-6.15186e-05	-0.0247612	0.00728995
Bacillus_thuringiensis_Al_Hakam_uid58795|purM	4.71278	0.00351127	9.93756e-05	0.0151962	-0.0254402	0.0498534	0.00316346	-0.0164715	0.000149063	-0.0308975	0.00607847	0.020902	-0.0284297	0.0116601	0.00311377	-0.00540769	0.0117098	0.000347815	0.00289017	-0.0222519	0.000223595
Bacillus_thuringiensis_Al_Hakam_uid58795|gatB	0.513737	0.0374099	-0.00860958	0.00718213	0.00137807	0.00127034	0.00815172	-0.00307485	-0.00653125	-0.00334418	-0.0173538	0.0201638	-0.00912131	0.0037796	-0.00693525	0.00790933	-0.00901358	0.00143194	0.0020514	-0.0263135	-0.000430928
Bacillus_thuringiensis_Al_Hakam_uid58795|proS	2.93986	0.0237486	0.0165875	0.000474973	-0.0208805	-0.0040738	-0.00580928	-0.0321885	0.00549872	0.00540738	0.0139752	-0.0284984	0.00310559	0.0310011	-0.00776398	0.00918889	-0.0119657	-0.00624772	0.0122397	0.0146876	-0.0184874
Bacillus_thuringiensis_Al_Hakam_uid58795|oppF	6.47826	0.0384799	0.00382953	-0.0246382	0.00309131	0.0144569	0.0113656	-0.0171022	0.0114271	-0.0250073	-0.0198859	-0.0135802	-0.0517525	0.0268682	0.00735147	0.0109349	0.0190246	0.0226696	-6.15186e-05	-0.0247612	0.00728995
Bacillus_thuringiensis_Al_Hakam_uid58795|oppF	6.47826	0.0384799	0.00382953	-0.0246382	0.00309131	0.0144569	0.0113656	-0.0171022	0.0114271	-0.0250073	-0.0198859	-0.0135802	-0.0517525	0.0268682	0.00735147	0.0109349	0.0190246	0.0226696	-6.15186e-05	-0.0247612	0.00728995
Bacillus_thuringiensis_Al_Hakam_uid58795|oppF	6.47826	0.0384799	0.00382953	-0.0246382	0.00309131	0.0144569	0.0113656	-0.0171022	0.0114271	-0.0250073	-0.0198859	-0.0135802	-0.0517525	0.0268682	0.00735147	0.0109349	0.0190246	0.0226696	-6.15186e-05	-0.0247612	0.00728995
Bacillus_thuringiensis_Al_Hakam_uid58795|recQ	0.662083	-0.0220456	0.0159289	0.0126241	-0.0350567	-0.0080813	0.00222391	-0.0222099	0.00663521	-0.0300684	0.0166702	0.0339174	4.74726e-05	0.0314817	0.00158851	-0.0136575	-0.0116929	-0.00706977	0.0117878	-0.0079754	0.0249523
Bacillus_thuringiensis_Al_Hakam_uid58795|moaA	-0.692983	-0.00462588	-0.00953152	-0.0212911	-5.99466e-05	0.0181439	0.0108404	-0.00919182	-0.0352686	-0.01119	0.00650421	0.0167151	-0.0119294	0.0154063	-0.0174645	0.0256771	0.0371469	0.0070737	0.00256771	-0.0218605	0.00233792
Bacillus_thuringiensis_Al_Hakam_uid58795|argS	1.13453	-0.00483508	0.00362159	0.00971417	-0.00143984	0.0057279	0.0234083	-0.0190574	0.00365932	0.00238296	-0.0122292	0.00420004	-0.0261371	0.0161023	0.00728091	-0.0102989	-0.0121537	0.000301799	0.00892195	-0.00299284	0.00382279
Bacillus_thuringiensis_Al_Hakam_uid58795|ileS	3.03158	0.0203675	-0.00095682	9.45585e-05	-0.00961875	0.00101861	-0.000930605	-0.0463917	0.0116372	-0.0270091	-0.00675391	0.0184623	-0.0125276	0.0155076	0.00197075	5.52371e-05	0.00874245	0.00585982	-0.00481499	0.0233073	0.00198011
Bacillus_thuringiensis_Al_Hakam_uid58795|hypF	0.0766761	0.00248772	-0.00561986	-0.0251454	0.00475791	0.000830876	0.00403662	-0.021974	0.00835946	-0.011382	0.00331533	-0.0051848	-0.0211464	0.0247529	0.00663065	-0.0132564	0.0091887	0.00389269	0.00248609	0.0201782	0.0127919
Bacillus_thuringiensis_Al_Hakam_uid58795|moaA	-0.692983	-0.00462588	-0.00953152	-0.0212911	-5.99466e-05	0.0181439	0.0108404	-0.00919182	-0.0352686	-0.01119	0.00650421	0.0167151	-0.0119294	0.0154063	-0.0174645	0.0256771	0.0371469	0.0070737	0.00256771	-0.0218605	0.00233792
Bacillus_thuringiensis_Al_Hakam_uid58795|pyrE	7.34767	0.0547297	0.0177427	-7.50751e-05	-0.0108358	0.0184685	0.00770771	-0.0108609	0.0185185	-0.0456206	0.0177427	-0.0286286	-0.0533033	0.0115616	0.0161912	0.0153904	0.0107858	-0.0139389	0.0185185	-0.0394394	-0.00465465
Bacillus_thuringiensis_Al_Hakam_uid58795|ileS	3.03158	0.0203675	-0.00095682	9.45585e-05	-0.00961875	0.00101861	-0.000930605	-0.0463917	0.0116372	-0.0270091	-0.00675391	0.0184623	-0.0125276	0.0155076	0.00197075	5.52371e-05	0.00874245	0.00585982	-0.00481499	0.0233073	0.00198011
Bacillus_thuringiensis_Al_Hakam_uid58795|alaS	0.903376	0.0257166	-0.00727472	-0.00600635	-0.0285261	0.00479799	-0.00088104	0.00444066	0.0123809	-0.00696104	-0.000141839	0.0139821	0.00644278	0.0341124	-0.00238399	-0.0119009	-0.0100406	0.0148877	-0.000166388	-0.0298135	-0.0126646
Bacillus_thuringiensis_Al_Hakam_uid58795|spoVB	5.9931	0.0263019	0.00465273	0.0167347	0.00123748	0.0130179	-0.00206689	-0.0128006	0.00750469	-0.0127606	0.0213875	-0.0128006	-0.0327598	0.0234145	-0.010095	-0.0275837	0.0238269	0.00532691	-0.00382775	0.000372573	-0.0290829
Bacillus_thuringiensis_Al_Hakam_uid58795|pheA	5.84237	0.0425742	-0.0117874	-0.000619693	-0.0169031	0.0042983	-0.0204367	-0.0257502	0.0347424	-0.029086	0.0172723	0.0060519	-0.0400823	0.00607827	0.0158879	-0.0137651	0.00568272	0.0227572	0.00313802	0.0027161	-0.00276884
Bacillus_thuringiensis_Al_Hakam_uid58795|hemA	5.20061	0.0145394	-0.00408	0.011615	-0.0185133	0.00803028	-0.00584878	-0.0228999	0.00231121	-0.0401278	0.00797132	0.0295741	-0.0455403	0.0199637	0.00906797	0.00845479	0.00577803	0.0166737	0.00152115	0.0104005	-0.00889109
Bacillus_thuringiensis_Al_Hakam_uid58795|pheT	6.74392	0.0502952	-0.0028218	-0.00464925	-0.0106153	0.0167919	-0.015914	-0.0478451	0.00180058	-0.0195331	0.00563464	-0.00137507	-0.0273087	0.0122905	-0.00971056	0.00258441	0.010257	0.00596608	0.00191703	0.0264891	0.00574661
Bacillus_thuringiensis_Al_Hakam_uid58795|glyS	5.53705	0.00276159	0.00397121	-0.0110616	-0.000699907	-0.000699907	0.0224122	-0.029921	0.00222905	-0.0189812	0.00705993	0.00280724	0.00185628	0.0114039	0.00838367	0.00448093	0.000578184	0.0110311	0.012682	-0.0181672	-0.0121267
Bacillus_thuringiensis_Al_Hakam_uid58795|trxB	-3.49651	-0.0245952	-0.00844689	0.0159732	-0.0193118	-1.29653e-05	0.0168873	-0.0146443	0.0212631	-0.0114743	-0.0161418	0.0361861	0.031363	0.0197526	-0.0200638	0.027441	0.00542597	-0.0156945	0.00120577	-0.0500849	0.00497219
Bacillus_thuringiensis_Al_Hakam_uid58795|argS	1.13453	-0.00483508	0.00362159	0.00971417	-0.00143984	0.0057279	0.0234083	-0.0190574	0.00365932	0.00238296	-0.0122292	0.00420004	-0.0261371	0.0161023	0.00728091	-0.0102989	-0.0121537	0.000301799	0.00892195	-0.00299284	0.00382279
Bacillus_thuringiensis_Al_Hakam_uid58795|speE	-1.57965	0.0185238	-0.00628571	-0.016381	0.00857143	-0.0287143	0.00247619	-0.000285714	0.00966667	-0.0208571	0.00528571	0.0146667	0.0131429	0.0291905	-0.00642857	0.0228571	0.0114762	-0.0278571	0.000857143	-0.0119048	-0.018
Bacillus_thuringiensis_serovar_konkukian_97_27_uid58089|oppF	6.21986	0.0306978	0.00382953	-0.0246382	0.00309131	0.0144569	0.0113656	-0.0132111	0.0114271	-0.0250073	-0.0198859	-0.0135802	-0.0517525	0.0268682	0.00735147	0.014826	0.0190246	0.0265606	-6.15186e-05	-0.0286523	0.00728995
Bacillus_thuringiensis_serovar_konkukian_97_27_uid58089|oppF	6.21986	0.0306978	0.00382953	-0.0246382	0.00309131	0.0144569	0.0113656	-0.0132111	0.0114271	-0.0250073	-0.0198859	-0.0135802	-0.0517525	0.0268682	0.00735147	0.014826	0.0190246	0.0265606	-6.15186e-05	-0.0286523	0.00728995
Bacillus_thuringiensis_serovar_konkukian_97_27_uid58089|purM	4.32853	0.00351127	9.93756e-05	0.0151962	-0.0254402	0.0498534	0.00316346	-0.0164715	0.000149063	-0.0280074	0.00607847	0.020902	-0.0284297	0.0087699	0.00311377	-0.00540769	0.0117098	0.000347815	0.00289017	-0.0222519	0.000223595
Bacillus_thuringiensis_serovar_konkukian_97_27_uid58089|gatB	0.233625	0.0353047	-0.00860958	0.00718213	0.00137807	0.00127034	0.00815172	-0.00728538	-0.00653125	-0.00334418	-0.0173538	0.0222691	-0.00912131	0.0037796	-0.00693525	0.00790933	-0.00901358	0.0035372	0.0020514	-0.0242083	-0.000430928
Bacillus_thuringiensis_serovar_konkukian_97_27_uid58089|proS	3.1495	0.0237486	0.0165875	-0.00162587	-0.0187797	-0.00197296	-0.00580928	-0.0300877	0.00549872	0.00540738	0.0139752	-0.0305992	0.00310559	0.0310011	-0.00776398	0.00708805	-0.0119657	-0.00834856	0.0122397	0.0167885	-0.0184874
Bacillus_thuringiensis_serovar_konkukian_97_27_uid58089|pyrE	4.77613	-0.0117596	0.010552	0.0144048	-0.0113283	0.0202415	0.0157849	-0.0118459	0.0159574	-0.0285796	0.00523289	0.0355952	-0.0491662	0.0210178	0.0103795	-0.0115009	0.0156124	-0.0116734	0.00531915	-0.023088	-0.0111558
Bacillus_thuringiensis_serovar_konkukian_97_27_uid58089|oppF	6.21986	0.0306978	0.00382953	-0.0246382	0.00309131	0.0144569	0.0113656	-0.0132111	0.0114271	-0.0250073	-0.0198859	-0.0135802	-0.0517525	0.0268682	0.00735147	0.014826	0.0190246	0.0265606	-6.15186e-05	-0.0286523	0.00728995
Bacillus_thuringiensis_serovar_konkukian_97_27_uid58089|oppF	6.21986	0.0306978	0.00382953	-0.0246382	0.00309131	0.0144569	0.0113656	-0.0132111	0.0114271	-0.0250073	-0.0198859	-0.0135802	-0.0517525	0.0268682	0.00735147	0.014826	0.0190246	0.0265606	-6.15186e-05	-0.0286523	0.00728995
Bacillus_thuringiensis_serovar_konkukian_97_27_uid58089|oppF	6.21986	0.0306978	0.00382953	-0.0246382	0.00309131	0.0144569	0.0113656	-0.0132111	0.0114271	-0.0250073	-0.0198859	-0.0135802	-0.0517525	0.0268682	0.00735147	0.014826	0.0190246	0.0265606	-6.15186e-05	-0.0286523	0.00728995
Bacillus_thuringiensis_serovar_konkukian_97_27_uid58089|hisA	4.58792	0.025556	0.00840292	-0.0076043	-0.00366326	-0.0117537	0.025174	-0.0115453	-0.00411465	-0.0407993	-0.00401049	0.021615	-0.0329867	0.0168753	-0.020608	0.00453133	0.0210247	0.00861126	-0.00411465	0.000902793	0.00850709
Bacillus_thuringiensis_serovar_konkukian_97_27_uid58089|cysG	13.6429	0.0543214	-0.00329747	-0.0258591	-0.0209418	0.0609742	-0.0524702	-0.0181071	0.0094296	-0.0413051	0.0182807	-0.0137105	-0.0414208	0.0210575	0.0315863	-0.0458174	-0.0098924	0.0321648	0.00775194	0.0233715	0.0138841
Bacillus_thuringiensis_serovar_konkukian_97_27_uid58089|recQ	0.400645	-0.0200809	0.0159289	0.0126241	-0.0370213	-0.0100459	0.00222391	-0.0222099	0.00663521	-0.0300684	0.0166702	0.0339174	0.00397675	0.0314817	0.00158851	-0.0156221	-0.0116929	-0.00706977	0.0117878	-0.0079754	0.0249523
Bacillus_thuringiensis_serovar_konkukian_97_27_uid58089|fni	2.71482	0.0128657	-0.0140361	-0.00155777	-0.0190403	-0.00146091	0.00344647	-0.0351669	0.0118003	-0.0329795	0.0145688	0.00708665	-0.0160297	0.026127	-0.00534323	-0.0102022	0.0203963	0.0351104	-0.00553695	0.00956455	0.000387425
Bacillus_thuringiensis_serovar_konkukian_97_27_uid58089|moaA	-0.791602	-0.00462588	-0.00953152	-0.0212911	-5.99466e-05	0.0181439	0.0108404	-0.00919182	-0.0352686	-0.01119	0.00650421	0.0167151	-0.00896202	0.0154063	-0.0174645	0.0227098	0.0371469	0.0070737	0.00256771	-0.0218605	0.00233792
Bacillus_thuringiensis_serovar_konkukian_97_27_uid58089|argS	1.07533	-0.00483508	0.00184223	0.00615545	-0.00143984	0.0057279	0.0234083	-0.017278	0.0107768	0.000603599	-0.0122292	0.00420004	-0.0261371	0.0161023	0.00728091	-0.00851955	-0.0121537	0.00208116	0.00892195	-0.00655156	0.00204343
Bacillus_thuringiensis_serovar_konkukian_97_27_uid58089|ileS	2.90263	0.0213356	-0.00192487	-0.00184155	-0.00768264	0.00198666	-0.000930605	-0.0483278	0.00970114	-0.026041	-0.00869002	0.0213665	-0.0125276	0.0155076	0.00100269	0.00102329	0.0097105	0.00682787	-0.00481499	0.0223392	0.00198011
Bacillus_thuringiensis_serovar_konkukian_97_27_uid58089|moaA	-0.791602	-0.00462588	-0.00953152	-0.0212911	-5.99466e-05	0.0181439	0.0108404	-0.00919182	-0.0352686	-0.01119	0.00650421	0.0167151	-0.00896202	0.0154063	-0.0174645	0.0227098	0.0371469	0.0070737	0.00256771	-0.0218605	0.00233792
Bacillus_thuringiensis_serovar_konkukian_97_27_uid58089|nrdD	0.938085	0.0056235	0.00643046	-0.00319001	-0.013773	0.0208255	0.0112008	-0.00344639	0.0047493	-0.0255243	0.00606901	-0.00740554	-0.000508553	0.0177153	0.00606901	0.00206784	0.00666583	-0.00340436	-0.00521582	-0.0131341	-0.0118144
Bacillus_thuringiensis_serovar_konkukian_97_27_uid58089|glnA	-0.496527	-0.0153214	-0.00443381	-0.00636287	0.0092716	-0.00869592	-0.00873631	0.00250475	0.0045954	-0.019937	0.00684765	0.0295823	0.0114633	0.00684765	-0.00200986	-0.013261	0.0159173	0.000191896	-0.00219165	-0.0109078	0.0046358
Bacillus_thuringiensis_serovar_konkukian_97_27_uid58089|ftsY	5.33547	0.0224152	0	-0.00871566	0.00457807	0.00240535	0.00895323	-0.0309874	0.0111458	-0.0264242	0.00900767	-0.00643405	-0.0110616	0.013467	-0.00215293	-0.0243801	0.0178768	0.00456818	0	0.0312843	-0.0155457
Bacillus_thuringiensis_serovar_konkukian_97_27_uid58089|ftsY	5.33547	0.0224152	0	-0.00871566	0.00457807	0.00240535	0.00895323	-0.0309874	0.0111458	-0.0264242	0.00900767	-0.00643405	-0.0110616	0.013467	-0.00215293	-0.0243801	0.0178768	0.00456818	0	0.0312843	-0.0155457
Bacillus_thuringiensis_serovar_konkukian_97_27_uid58089|sun	4.35863	0.0389053	-0.00243737	0.00897816	0.00601629	0.0185425	-0.0231704	-0.0158892	0.0190979	-0.0147168	-0.00487474	0.00311613	-0.0505677	0.0256695	0.000617055	-0.0120017	0.0185425	-0.0211959	0.00900901	0.00240652	-0.00604714
Bacillus_thuringiensis_serovar_konkukian_97_27_uid58089|pyrE	4.77613	-0.0117596	0.010552	0.0144048	-0.0113283	0.0202415	0.0157849	-0.0118459	0.0159574	-0.0285796	0.00523289	0.0355952	-0.0491662	0.0210178	0.0103795	-0.0115009	0.0156124	-0.0116734	0.00531915	-0.023088	-0.0111558
Bacillus_thuringiensis_serovar_konkukian_97_27_uid58089|ileS	2.90263	0.0213356	-0.00192487	-0.00184155	-0.00768264	0.00198666	-0.000930605	-0.0483278	0.00970114	-0.026041	-0.00869002	0.0213665	-0.0125276	0.0155076	0.00100269	0.00102329	0.0097105	0.00682787	-0.00481499	0.0223392	0.00198011
Bacillus_thuringiensis_serovar_konkukian_97_27_uid58089|alaS	0.903376	0.0232835	-0.00970781	-0.00600635	-0.026093	0.00479799	-0.00088104	-0.000425518	0.0123809	-0.00696104	-0.000141839	0.0164152	0.00644278	0.0341124	-0.00238399	-0.014334	-0.0100406	0.0173208	-0.000166388	-0.0273804	-0.0102315
Bacillus_thuringiensis_serovar_konkukian_97_27_uid58089|spoVB	8.47605	0.0496727	-0.000874568	0.0138428	-0.0116427	-0.0135558	-0.0172317	-0.0229984	0.0134875	-0.0246792	0.00911464	0.00204977	-0.0361579	0.0338075	0.00394922	-0.0370188	0.020935	0.0315391	-0.0056027	0.0100029	-0.0186392
Bacillus_thuringiensis_serovar_konkukian_97_27_uid58089|pheA	5.60762	0.0425742	-0.0153209	-0.000619693	-0.0169031	0.000764728	-0.0204367	-0.0292838	0.0347424	-0.029086	0.0172723	0.0060519	-0.0400823	0.00607827	0.0158879	-0.0102315	0.00921629	0.0227572	0.00313802	0.00624967	-0.00276884
Bacillus_thuringiensis_serovar_konkukian_97_27_uid58089|hemA	5.27552	0.0145394	-0.00408	0.011615	-0.0185133	0.00803028	-0.00584878	-0.0228999	0.00231121	-0.0401278	0.00797132	0.0295741	-0.0455403	0.0199637	0.00906797	0.00845479	0.00577803	0.0166737	0.00152115	0.0104005	-0.00889109
Bacillus_thuringiensis_serovar_konkukian_97_27_uid58089|pheT	6.99175	0.0502952	-0.0028218	-0.00588994	-0.0106153	0.0167919	-0.0146733	-0.0478451	0.00180058	-0.0195331	0.00563464	-0.00137507	-0.0273087	0.0122905	-0.00971056	0.0038251	0.010257	0.00596608	0.00191703	0.0264891	0.00450592
Bacillus_thuringiensis_serovar_konkukian_97_27_uid58089|glyS	5.53705	0.00276159	0.00397121	-0.0110616	-0.000699907	-0.00288331	0.0224122	-0.029921	0.00222905	-0.0189812	0.00705993	0.00280724	0.00185628	0.0114039	0.00838367	0.00666433	0.000578184	0.0110311	0.012682	-0.0181672	-0.0121267
Bacillus_thuringiensis_serovar_konkukian_97_27_uid58089|trxB	-3.30603	-0.0245952	-0.00844689	0.0159732	-0.0193118	-1.29653e-05	0.0168873	-0.0146443	0.0212631	-0.0114743	-0.0161418	0.0361861	0.031363	0.0197526	-0.0200638	0.027441	0.00542597	-0.0156945	0.00120577	-0.0500849	0.00497219
Bacillus_thuringiensis_serovar_konkukian_97_27_uid58089|argS	1.07533	-0.00483508	0.00184223	0.00615545	-0.00143984	0.0057279	0.0234083	-0.017278	0.0107768	0.000603599	-0.0122292	0.00420004	-0.0261371	0.0161023	0.00728091	-0.00851955	-0.0121537	0.00208116	0.00892195	-0.00655156	0.00204343
Bacillus_thuringiensis_serovar_konkukian_97_27_uid58089|speE	-0.429793	0.0123016	-0.00687831	-0.0190476	0.029806	-0.0310847	-0.000881834	-0.00255732	0.00709877	-0.0163139	0.00163139	0.0185185	0.0188713	0.0320547	-0.00445326	0.0169312	0.00930335	-0.028351	0.00026455	-0.016843	-0.0203704
Bradyrhizobium_BTAi1_uid58505|hypF	29.9559	0.0831087	-0.00088472	-0.0365415	0.00912894	0.0238084	-0.00320389	-0.0678623	0.0109534	-0.0722206	-0.00229168	0.00998102	-0.0631965	0.00962885	0.0298537	-0.0157618	0.0576408	0.00220407	0.0132725	0.0327501	-0.0203675
Bradyrhizobium_BTAi1_uid58505|hypB	25.0899	0.0369784	6.40041e-05	-0.0015681	-0.0238255	0.015473	-0.0106247	-0.0838134	0.00553635	-0.0730607	-0.00798451	0.031634	-0.0391705	0.00452829	0.0251536	0.0359063	0.061876	0.00824053	0.00716846	0.00208013	0.00540835
Bradyrhizobium_BTAi1_uid58505|hisA	34.1265	0.128244	-0.000100795	-0.0467519	0.018731	0.00173031	0.0240899	-0.0555546	-0.00425017	-0.0637526	0.00354461	0.018227	-0.0378484	0.00769399	-0.000907151	-0.0212509	0.0482806	0.0114402	-0.000201589	-0.0228636	-0.00850034
Bradyrhizobium_BTAi1_uid58505|ffh	33.9229	0.0501187	0	-0.038123	0.0104639	0.0384466	-0.00834951	-0.0361812	0.00526429	-0.0656526	0.0118662	0.003452	-0.0119741	-0.00977346	0.0210356	-0.0144984	0.0432362	-0.00645092	0	0.0212945	-0.0141748
Bradyrhizobium_BTAi1_uid58505|ftsY	32.8999	0.0942857	0	-0.035873	0.0142857	0.00253968	0.00857143	-0.0390476	0.00825397	-0.0657143	-0.0285714	-0.00952381	-0.0174603	-0.0180952	-0.00793651	-0.00571429	0.0304762	0.0155556	0.00952381	0.0612698	-0.0168254
Bradyrhizobium_BTAi1_uid58505|hypF	29.9559	0.0831087	-0.00088472	-0.0365415	0.00912894	0.0238084	-0.00320389	-0.0678623	0.0109534	-0.0722206	-0.00229168	0.00998102	-0.0631965	0.00962885	0.0298537	-0.0157618	0.0576408	0.00220407	0.0132725	0.0327501	-0.0203675
Bradyrhizobium_BTAi1_uid58505|hypB	25.0899	0.0369784	6.40041e-05	-0.0015681	-0.0238255	0.015473	-0.0106247	-0.0838134	0.00553635	-0.0730607	-0.00798451	0.031634	-0.0391705	0.00452829	0.0251536	0.0359063	0.061876	0.00824053	0.00716846	0.00208013	0.00540835
Bradyrhizobium_BTAi1_uid58505|ileS	30.8129	0.0734613	-0.00159541	-0.0316129	0.0112453	0.0208487	-0.00465069	-0.0273194	0.00374843	-0.0445581	-0.00419181	0.00450934	-0.0319672	0.00468166	0.0142667	-0.00901191	0.0371203	0.00486657	0.000914841	-0.00933525	-0.0114205
Bradyrhizobium_BTAi1_uid58505|glnA	24.5265	0.0356046	0.000508636	-0.0342032	0.0111485	0.00688216	-0.0188714	-0.0190168	0.00528359	-0.0253799	0.012228	0.0276428	-0.00317638	0.00528359	0.0017439	-0.0143871	0.0149788	0.00832503	0.00969523	-0.0275494	0.00325943
Bradyrhizobium_BTAi1_uid58505|hypB	25.0899	0.0369784	6.40041e-05	-0.0015681	-0.0238255	0.015473	-0.0106247	-0.0838134	0.00553635	-0.0730607	-0.00798451	0.031634	-0.0391705	0.00452829	0.0251536	0.0359063	0.061876	0.00824053	0.00716846	0.00208013	0.00540835
Bradyrhizobium_BTAi1_uid58505|hypF	29.9559	0.0831087	-0.00088472	-0.0365415	0.00912894	0.0238084	-0.00320389	-0.0678623	0.0109534	-0.0722206	-0.00229168	0.00998102	-0.0631965	0.00962885	0.0298537	-0.0157618	0.0576408	0.00220407	0.0132725	0.0327501	-0.0203675
Bradyrhizobium_BTAi1_uid58505|purM	32.7598	0.0656217	0.00254428	-0.0355397	-0.00147681	0.0513592	0.00209482	-0.041463	-0.0059875	-0.0611351	-0.0175772	0.0430843	-0.0348334	-0.000256836	0.0162288	-0.000963136	0.0220237	0.00750443	0.00280112	-0.00784956	-0.00618012
Bradyrhizobium_BTAi1_uid58505|argS	29.1431	0.0647801	-0.0038172	-0.0529681	0.0325644	0.0137916	-0.000407719	-0.0306321	0.0126216	-0.0429996	-0.00671851	0.0119007	-0.0526549	0.0110439	0.027199	-0.014542	0.0378647	-0.0189915	0.00482764	0.0124679	-0.0053299
Bradyrhizobium_BTAi1_uid58505|gltX	31.7732	0.073144	-0.0047896	-0.0466644	0.0080967	0.0182917	-0.0125214	-0.022055	9.12305e-05	-0.0596305	-0.00382028	0.0301631	-0.0176189	0.00940814	0.00677386	0.00435625	0.0288402	0.0212339	0.00606683	-0.0253507	-0.0140153
Bradyrhizobium_BTAi1_uid58505|glnA	24.5265	0.0356046	0.000508636	-0.0342032	0.0111485	0.00688216	-0.0188714	-0.0190168	0.00528359	-0.0253799	0.012228	0.0276428	-0.00317638	0.00528359	0.0017439	-0.0143871	0.0149788	0.00832503	0.00969523	-0.0275494	0.00325943
Bradyrhizobium_BTAi1_uid58505|gatB	28.1579	0.0551164	-0.00679529	-0.0228778	0.0135689	0.0253653	0.00916584	-0.0117184	-0.00689497	-0.0310079	-0.018154	0.0129709	-0.0249493	0.00450275	-0.00229254	0.0306265	0.00796973	-0.0187521	0.00386569	-0.00998492	-0.00972489
Bradyrhizobium_BTAi1_uid58505|oppF	37.5639	0.0704333	0.0150348	-0.0355356	0.00557863	0.00480312	-0.000775504	-0.0386876	0.0189998	-0.087732	-0.0181743	0.00721719	-0.0656051	0.0110947	0.0387877	0.0348477	0.0704333	0.00399009	-0.000788012	-0.0212888	-0.0126332
Bradyrhizobium_BTAi1_uid58505|alaS	32.2813	0.0846212	-0.0101097	-0.0272361	-0.00363849	0.0365151	0.00320307	-0.0383068	0.00550529	-0.0394629	-0.00346833	0.0108104	-0.0169513	-0.00236227	0.00321809	0.0076073	0.0321909	-0.0103149	-0.00340327	-0.00704676	-0.0213705
Bradyrhizobium_BTAi1_uid58505|nifH	27.301	0.0545514	-0.00541506	0.0176531	-0.0100504	-0.000541506	-0.0151947	-0.0368549	0.0171441	-0.0194401	0.00892403	0.00487356	-0.01683	0.00175448	-0.00483024	-0.00366058	0.0153138	0.0123139	0	-0.0122705	-0.0074403
Bradyrhizobium_BTAi1_uid58505|nifH	27.301	0.0545514	-0.00541506	0.0176531	-0.0100504	-0.000541506	-0.0151947	-0.0368549	0.0171441	-0.0194401	0.00892403	0.00487356	-0.01683	0.00175448	-0.00483024	-0.00366058	0.0153138	0.0123139	0	-0.0122705	-0.0074403
Bradyrhizobium_BTAi1_uid58505|oppF	37.5639	0.0704333	0.0150348	-0.0355356	0.00557863	0.00480312	-0.000775504	-0.0386876	0.0189998	-0.087732	-0.0181743	0.00721719	-0.0656051	0.0110947	0.0387877	0.0348477	0.0704333	0.00399009	-0.000788012	-0.0212888	-0.0126332
Bradyrhizobium_BTAi1_uid58505|pheA	31.2117	0.0659378	-0.0153951	-0.00143513	-0.00678426	0.0246843	0.000208746	-0.0158908	0.0202745	-0.050621	0.0170128	0.00159169	-0.0615802	0.00931531	0.015369	0.00673207	0.0368177	0.00464461	-0.00046968	-0.0191525	-0.0312598
Bradyrhizobium_BTAi1_uid58505|pyrE	33.5125	0.0702703	-0.00540541	-0.00540541	-0.00540541	0.0324324	0.0432432	-0.027027	0.0108108	-0.0594595	0.0216216	-0.00540541	-0.0702703	-0.0108108	0.0162162	-0.00540541	0.0540541	0	0.00540541	-0.0486486	-0.0108108
Bradyrhizobium_BTAi1_uid58505|lysC	29.4764	0.0626917	-0.00350673	-0.0349753	0.0204883	-0.0160921	-0.010009	-0.018832	0.00657384	-0.0248027	-0.00171758	-0.0218992	-0.0201816	0.0278493	0.0075962	-0.00805627	0.0234838	0.000490737	0.00504028	0.00193228	0.0039259
Brevibacillus_brevis_NBRC_100599_uid59175|purM	18.3535	0.00640144	-0.0027908	-0.0079252	-0.0109893	0.0325124	0.000273283	-0.0395929	0.00303924	-0.0337877	0.00896865	0.00934131	-0.0284297	0.0145502	0.00889412	0.00615301	0.00592941	0.000347815	0.00578035	0.0182106	0.00311377
Brevibacillus_brevis_NBRC_100599_uid59175|gatB	15.1012	0.0369343	-0.00237307	0.000245336	-0.00526804	0.000847526	0.018427	-0.0202737	-0.00241322	-0.0227672	-0.0133151	-0.00132482	-0.0052279	0.00563382	-0.00301541	0.0138816	-0.00297526	0.00318045	0.00410381	0.00471046	-0.00901054
Brevibacillus_brevis_NBRC_100599_uid59175|proS	17.7997	0.0241447	0.00577334	-0.00226301	-0.0115645	0.00687812	0.00340342	-0.0252316	-0.00137206	-0.0215075	0.0151461	-0.0302031	-0.00596935	0.0319138	0.00775125	0.00595153	0.0179971	-0.0055417	0.017819	-0.00361725	-0.0295082
Brevibacillus_brevis_NBRC_100599_uid59175|ileS	16.5634	0.0198024	-0.00185883	-0.0148329	0.00537099	0.0140524	0.00127629	-0.0286365	0.0108871	-0.0284631	-0.00956561	0.0171272	-0.0248811	0.00892275	0.00417765	0.000444912	0.0246078	0.00138941	-0.00564435	0.00741834	-0.0015949
Brevibacillus_brevis_NBRC_100599_uid59175|moaA	13.6051	-0.0138256	-0.0126039	-0.0188314	0.0173416	0.0295581	0.0017282	-0.0125443	-0.0353386	-0.0677274	0.0151962	0.01317	-0.012157	0.0122464	-0.0117398	0.0312267	0.0750574	0.0067936	0.0025327	-0.0163285	-0.00375436
Brevibacillus_brevis_NBRC_100599_uid59175|lysC	13.6771	0.0327497	-0.00584115	-0.010125	0.0116719	-0.00556694	-0.0169543	-0.0323462	0.00199189	-0.0218021	0.00583597	0.000558763	-0.027069	0.00897125	-0.00413381	0.00967488	0.00968006	0.00853666	0.000284555	0.0224902	0.0113926
Brevibacillus_brevis_NBRC_100599_uid59175|hemA	16.6168	0.0170099	-0.00427843	-0.00393247	-0.0129967	0.0157991	-3.45965e-05	-0.0311945	0.00852227	-0.0438683	0.00507415	0.0249902	-0.0306179	0.0257283	0.00631963	-0.00169523	0.0180017	0.0219918	0.00137233	-0.00239869	-0.0137925
Brevibacillus_brevis_NBRC_100599_uid59175|pheA	13.046	0.0271595	-0.0189037	0.0192028	-0.0243642	-0.00345832	-0.0139113	-0.0231031	0.00971189	-0.043762	0.00995892	0.032646	-0.0477404	0.0196708	0.03262	-0.000468043	0.0226611	0.0184357	0.00299028	-0.00195018	-0.0173956
Brevibacillus_brevis_NBRC_100599_uid59175|spoVB	21.5736	0.0592628	0.000953686	0.00949656	-0.00991296	-0.00131636	-0.0183484	-0.0457366	0.0151515	-0.0368311	0.00855631	0.00918762	-0.0363878	0.0331507	0.0109338	-0.043883	0.0279524	0.0189931	-0.00188051	0.023775	-0.0231168
Brevibacillus_brevis_NBRC_100599_uid59175|alaS	14.1855	0.0333882	-0.0111726	-0.0113277	-0.00266414	0.0212089	0.0094389	-0.0240281	0.000190659	-0.0307292	-0.00309631	0.00655868	-0.0040013	0.0139359	0.00940077	-0.000612652	0.0129165	-0.00611635	-0.00326154	0.00769246	-0.0177211
Brevibacillus_brevis_NBRC_100599_uid59175|argS	16.8297	0.0326561	-0.00357998	-0.0290266	0.00483622	0.0135309	0.00141095	-0.032158	0.0103841	-0.0200071	0.00147284	0.0149728	-0.0374583	0.0244101	0.017312	-0.00396676	-0.00212262	-0.000371303	0.0104769	-0.000696194	-0.0020762
Brevibacillus_brevis_NBRC_100599_uid59175|recQ	12.1272	0.0181846	0.0141752	-0.0160487	-0.0246477	-0.00143747	-0.0112005	-0.0352827	0.0108457	-0.0332947	0.0150805	0.0372412	-0.00151877	0.0322784	0.00790425	-0.016954	-0.0189421	-0.00458956	0.00795229	-0.00528428	0.0255382
Brevibacillus_brevis_NBRC_100599_uid59175|fni	13.9052	0.0383099	-0.0111871	-0.0103421	-0.00772636	0.00402414	-0.0109457	-0.0525553	0.00313883	-0.058833	0.0344869	0.0154125	-0.0218913	0.0231388	0.00603622	-0.0218109	0.0574245	0.00631791	-0.00555332	0.0265191	-0.0139638
Brevibacillus_brevis_NBRC_100599_uid59175|glnA	9.31621	-0.00631237	-0.00443381	-0.00411061	0.0047671	-0.00419141	-0.00873631	0.00700925	0.00684765	-0.0154325	0.0158567	0.0228255	-0.00880701	0.00684765	0.0047469	-0.013261	0.0181695	0.000191896	-0.00219165	-0.0244213	0.0046358
Brevibacillus_brevis_NBRC_100599_uid59175|ffh	17.0859	0.0270449	0	-0.0207092	0.00189125	0.00297872	0.0225532	-0.0419858	0.00619385	-0.0440662	0.01513	-0.0132388	0.0113475	0.00865248	0.00496454	-0.0171631	0.0286525	-0.00855792	0	0.0320567	-0.0157447
Brevibacillus_brevis_NBRC_100599_uid59175|ftsY	13.5233	0.0251078	0.00298507	-0.00905473	0.0310116	-0.0113433	0.0158209	-0.0269652	0.00749585	-0.0609287	-0.026534	0.0053068	0.00248756	0.019005	-0.0154229	-0.0294527	0.0210945	0.00262023	0.00298507	0.0548259	-0.0110448
Brevibacillus_brevis_NBRC_100599_uid59175|pyrE	18.6738	0.0684857	0.00416397	-0.0207423	-0.00975042	0.0116902	0.022682	0.000879348	0.0191388	-0.0764774	0.00894866	-0.0261477	-0.0619423	0.0459847	0.0316307	0.00336221	0.0118712	-0.0122333	0.0143541	-0.0321738	-0.0037243
Brevibacillus_brevis_NBRC_100599_uid59175|ileS	16.5634	0.0198024	-0.00185883	-0.0148329	0.00537099	0.0140524	0.00127629	-0.0286365	0.0108871	-0.0284631	-0.00956561	0.0171272	-0.0248811	0.00892275	0.00417765	0.000444912	0.0246078	0.00138941	-0.00564435	0.00741834	-0.0015949
Brevibacillus_brevis_NBRC_100599_uid59175|murG	18.2269	0.0336114	-0.0193289	-0.0162501	-0.0191745	0.0198227	0.0168674	-0.0384725	0.00566362	-0.0661579	-0.0109723	0.0338737	-0.0164044	0.0362426	0.00300157	-0.0135109	0.058573	-0.00255403	0.0139276	0.0171298	-0.0358876
Brevibacillus_brevis_NBRC_100599_uid59175|hisA	20.7824	0.0785882	0.00388275	-0.0230132	0.00603243	0.0129981	0.0117816	-0.0440267	-0.000266627	-0.0843207	-0.000666567	-0.00668233	-0.042027	0.0195471	-0.00923195	-0.00133313	0.0397607	0.0472596	0.00374944	-0.0275625	0.015531
Brevibacillus_brevis_NBRC_100599_uid59175|speE	8.94213	0.0252048	-0.00711726	-0.0104455	-0.00691244	0.0109703	0.00015361	0.0145673	0.021595	-0.0140041	0.0179595	-0.0354839	-0.0141833	-0.00346902	0.00375064	-0.0105479	0.00723246	0.000243216	0.00360983	0.0110343	-0.0141577
Carboxydothermus_hydrogenoformans_Z_2901_uid57821|argS	11.4913	0.0262766	-0.00344793	-0.00891639	-0.00281988	0.0188383	0.000628049	-0.0185782	0.0163864	-0.0183784	-0.0156441	0.0337719	-0.0400365	0.00738116	0.00575712	-0.0153016	0.0186385	-0.0136775	0.00364776	-0.00589668	0.0113715
Carboxydothermus_hydrogenoformans_Z_2901_uid57821|tpiA	11.4258	0.0168805	-0.00538885	0.00891233	-0.00062179	0.0146927	0.0438247	-0.00702393	-0.00937291	0.0121134	-0.00140479	-0.028349	-0.0356954	0.0260922	-0.00421436	-0.0392879	0.00695484	-0.00421436	0.0159363	-0.0239735	0.01414
Carboxydothermus_hydrogenoformans_Z_2901_uid57821|hemG	9.88564	0.0373955	-0.00634537	0.033414	-0.0186143	0.0226978	0.00939059	-0.0160233	-0.00197453	-0.020167	0.000454234	0.0357454	-0.0294927	0.000259562	0.01143	-0.031305	0.0307581	-0.0314024	-0.00200697	-0.00984018	-0.0143733
Carboxydothermus_hydrogenoformans_Z_2901_uid57821|ileS	12.0705	0.0306184	0.0046108	-0.00903027	-0.00437033	0.0137216	-0.00192796	-0.0189911	0.00575043	-0.0260996	-0.00483245	0.0214062	-0.0319672	0.00552251	0.0171896	-0.018141	0.0274306	-0.00994825	-0.00016624	-0.000726645	-4.914e-05
Carboxydothermus_hydrogenoformans_Z_2901_uid57821|alaS	10.1101	0.031816	-0.00313234	-0.000210362	-0.00667002	0.0174729	0.0143995	-0.0177884	0.00263466	-0.0118829	-0.0108875	0.0199228	-0.0230577	-0.00397636	0.00174447	-0.00477419	0.0145381	-0.00561821	-0.00546685	0.000472032	-0.00953556
Carboxydothermus_hydrogenoformans_Z_2901_uid57821|moaA	6.37514	-0.0110136	-0.0116114	-0.032726	-0.000660814	0.0307436	0.0192895	0.00355581	-0.0377923	-0.0350861	-0.0108562	0.0560118	0.00868498	-0.0046257	-0.000409075	0.0161742	0.0314988	0.00320967	0.00286353	-0.0249851	-0.00226565
Carboxydothermus_hydrogenoformans_Z_2901_uid57821|spoVB	13.7119	0.0217788	-0.00272412	0.00313156	-0.0132606	0.000862245	0.00142602	-0.0545915	0.00601202	-0.0348498	-0.0116166	0.0836851	-0.0235933	0.0153119	0.0153593	-0.0242187	0.0222478	0.0202912	-0.00144023	-0.00879774	-0.0150135
Carboxydothermus_hydrogenoformans_Z_2901_uid57821|purM	13.2868	0.00999942	-0.00271496	-0.00141178	-0.0163399	0.0276926	-0.00236411	-0.0157384	-0.00553017	-0.033181	-0.00814489	0.0159306	-0.0165404	0.00020049	0.00919746	-0.00799452	0.014878	0.00944807	0.00874636	0.00758519	0.00628201
Carboxydothermus_hydrogenoformans_Z_2901_uid57821|hisA	10.6512	0.0160169	-0.00414938	0.00747913	-0.0046275	0.00744497	0.00816215	-0.00510561	-0.00418353	-0.0545225	-0.00428598	0.0198931	-0.0251695	-0.00425183	-0.012653	0.00377371	0.045165	0.0203371	0.00404692	-0.0214641	0.00809385
Carboxydothermus_hydrogenoformans_Z_2901_uid57821|gatB	8.62188	0.0364645	0.00378565	0.0100271	-0.00767325	-0.00580702	-0.000531941	-0.010231	-0.00458356	-0.0128419	-0.0218007	0.0294296	-0.0117781	-0.00293011	0.00293454	-0.00724769	0.00506674	-0.00756686	0.00197261	-0.00831158	0.0116229
Carboxydothermus_hydrogenoformans_Z_2901_uid57821|hemA	6.26845	0.00687974	-0.00195315	-0.0162898	-0.0235194	0.00527641	-0.0040229	-0.0215254	0.0154736	-0.0275423	-0.0124244	0.0395061	-0.0212922	0.0173101	0.0154736	0.012232	-0.0014051	0.00934013	-0.000781259	0.0050432	0.00422113
Carboxydothermus_hydrogenoformans_Z_2901_uid57821|ffh	5.60144	0.0117887	0.00224215	-0.00594918	0.000498256	-0.00152466	0.0158744	-0.0149178	0.00900847	-0.00775286	-0.00184355	-0.00124564	0.000298954	-0.00182362	0.00254111	-0.0174589	0.00248132	-0.0107524	0	0.0273244	-0.00878924
Carboxydothermus_hydrogenoformans_Z_2901_uid57821|ftsY	4.63128	0.0114631	0.00330033	0.00244224	0.00385039	-0.00409241	0.019604	-0.00745875	-0.00114411	-0.0266447	-0.0378438	0.00770077	-0.00693069	-0.00706271	-0.000330033	-0.02033	0.0162376	0.0049945	0.00330033	0.0457426	-0.00679868
Carboxydothermus_hydrogenoformans_Z_2901_uid57821|pyrE	12.1808	0.0134994	0.0207726	-0.00829206	-0.00135843	0.0189048	0.0363096	-0.0390265	0.0104712	-0.0457903	0.0260082	0.0124805	-0.0601387	0.00472619	0.0309042	-0.0121692	0.0254988	-0.0282157	0	0.00166973	-0.00625442
Carboxydothermus_hydrogenoformans_Z_2901_uid57821|hypF	6.77092	0.0222729	-0.00218463	-0.0192316	-0.00537385	0.00270068	0.0154077	-0.0306708	0.00170642	0.00340252	-0.0009461	0.0180791	-0.044606	0.0136428	0.0206542	-0.0249753	0.0153199	-0.0136531	0.00533428	0.0235699	-0.000448967
Carboxydothermus_hydrogenoformans_Z_2901_uid57821|hypB	4.07508	0.00576299	-0.00876623	0.0102273	-0.0344968	-0.00787338	0.000649351	-0.0160714	-0.0400974	-0.0387987	0.000405844	0.0468344	0.0012987	0.0229708	0.0321429	0.00941558	0.0184253	0.000892857	0	-0.0121753	0.00925325
Carboxydothermus_hydrogenoformans_Z_2901_uid57821|pheT	6.97531	0.0223935	-0.00275961	-0.00985768	-0.0201677	0.0138161	-0.00683116	-0.0235381	-0.013038	-0.0150647	-0.00787619	0.025886	-0.00944147	0.00255151	0.0069533	0.00179148	0.0131737	0.00279127	0.00320748	0.00118075	0.0148295
Carboxydothermus_hydrogenoformans_Z_2901_uid57821|pheS	9.38826	0.00611765	0.00470588	-0.0387059	0.00294118	0.0165882	-0.00694118	-0.0191765	0.00752941	-0.0345882	0.00741176	0.0304706	-0.0216471	0.0134118	0.0129412	0.004	0.008	0.00211765	-0.00811765	0.00858824	0.00435294
Carboxydothermus_hydrogenoformans_Z_2901_uid57821|nrdD	9.82587	0.0270811	-0.00106451	-0.00821801	-0.0111348	0.0140515	0.0131999	0.00212902	-0.0056419	-0.0274005	0.000659996	0.010049	-0.00200128	0.00383223	0.0200341	-0.0193102	0.0223334	-0.0146902	-0.00870769	-0.0062806	-0.00892059
Carboxydothermus_hydrogenoformans_Z_2901_uid57821|selD	11.9748	0.0400757	-0.0158239	0.00791194	-0.0462676	0.000515996	-0.0173719	-0.0220158	0.00206398	-0.0263158	0.00429997	0.0216718	-0.0206398	0.0141039	0.0366357	-0.0139319	0.00206398	0.0123839	-0.00945992	0.0223598	0.00773994
Carboxydothermus_hydrogenoformans_Z_2901_uid57821|gltX	8.00852	0.00484234	-0.000675676	0.023536	-0.0387387	0.0173423	0.0079955	0.000281532	-0.0106419	-0.0267455	-0.0103604	0.0161599	-0.00337838	0.00281532	0.00619369	0.00591216	0.0110923	0.0121622	-0.00247748	-0.0134572	-0.00185811
Clostridium_botulinum_A2_Kyoto_uid59229|nrdD	-6.41188	-0.00904173	0.00384328	0.00404729	-0.00535327	0.0108013	-0.00530045	0.0360467	-0.0100271	-0.00566656	-0.00363746	-0.00977031	0.0185935	-0.00493616	0.00477769	0.000672119	0.00882862	-0.0140799	-0.00748074	-0.00795067	-0.00436604
Clostridium_botulinum_A2_Kyoto_uid59229|ileS	-4.20784	0.00177398	0.00284545	0.00155037	-0.00698971	0.00461571	0.00563127	-0.0166758	0.0008814	-0.0071276	-0.00105284	0.0112849	0.000736053	-7.4537e-05	0.00275228	-0.00214667	0.000844132	-0.00116837	-0.00202741	-0.0022212	0.00656858
Clostridium_botulinum_A2_Kyoto_uid59229|hypB	-1.63624	-0.0131526	-0.00888853	0.0227018	-0.035414	-0.00418402	-0.00880846	-0.021901	-0.0356742	-0.0174167	0.00906871	0.0362148	-0.0086483	0.013513	0.013533	0.0404388	0.0224816	-0.0087484	0.0134529	-0.0130926	0.00452434
Clostridium_botulinum_A2_Kyoto_uid59229|nifH	4.94607	0.0236345	0.00173217	0.0172447	-0.00529915	0.0142294	-0.00867367	-0.0499378	0.0088533	0.0100337	0.00100081	0.000449081	-0.0334116	-0.0167058	0.0041957	0.00109062	0.00337452	0.0210811	0	0.0156922	-0.00858386
Clostridium_botulinum_A2_Kyoto_uid59229|argS	-4.72094	0.000376579	0.00182327	-0.0118215	0.01624	0.00917284	0.0108643	-0.008495	0.00185151	0.0270949	-0.0122639	0.0129135	-0.0209002	6.59014e-05	0.00189859	-0.0139272	-0.0122074	-0.00510265	0.00534743	-0.00668114	0.0037501
Clostridium_botulinum_A2_Kyoto_uid59229|hisA	-4.39184	0.0204383	0.00411509	-0.0127739	-0.00438942	-0.000394362	0.00823017	0.0490895	-0.00416652	-0.0170433	-0.00421796	-0.000342924	0.0204211	-0.00833305	-0.0208155	0.0122252	0.00821302	-0.00425225	-0.00416652	-0.0500326	0.00819588
Clostridium_botulinum_A2_Kyoto_uid59229|hypF	-6.20992	-0.017136	0.00880438	-0.0229262	-0.00774217	-0.00554107	0.00186087	-0.000640522	0.00776932	0.0261384	0.00161169	-0.0134669	0.0119495	-0.00331442	-0.000471207	-0.00962859	-0.000405717	-0.00209567	0.00116604	0.00386549	0.0202028
Clostridium_botulinum_A2_Kyoto_uid59229|gldA	0.751679	0.0478246	0.0315805	-0.00105109	-0.00369474	0.0145878	0.0186011	-0.0459613	-0.00234106	-0.0183463	-0.00732577	-0.0020544	-0.00501656	-0.0046662	-0.00401325	-0.0372977	-0.00533507	0.0205759	-0.000334438	0.01626	-0.011992
Clostridium_botulinum_A2_Kyoto_uid59229|hypB	-1.63624	-0.0131526	-0.00888853	0.0227018	-0.035414	-0.00418402	-0.00880846	-0.021901	-0.0356742	-0.0174167	0.00906871	0.0362148	-0.0086483	0.013513	0.013533	0.0404388	0.0224816	-0.0087484	0.0134529	-0.0130926	0.00452434
Clostridium_botulinum_A2_Kyoto_uid59229|ffh	-1.77564	-0.00431081	0.00445434	-0.00871566	-0.00210344	-0.00650334	0.00895323	-0.0176244	0.00669141	-0.0152883	0.00900767	-0.00197971	0.0245731	-0.0110319	-0.0043801	0.015709	0.00896808	-0.011022	0	0.0179213	-0.0133185
Clostridium_botulinum_A2_Kyoto_uid59229|ftsY	-2.05732	0.0147635	0.00990099	-0.000858086	0.0236524	-0.00409241	0.0130033	0.0156436	0.00215622	-0.0266447	-0.0279428	-0.0187019	-0.00363036	-0.020264	-0.010231	-0.00382838	0.0030363	0.00829483	0.00330033	0.0325413	-0.010099
Clostridium_botulinum_A2_Kyoto_uid59229|alaS	-5.4165	0.0165904	-0.00319743	0.00149222	0.00437462	0.00331987	0.00958208	5.61176e-05	0.00252402	0.012703	-0.00187739	-0.00566532	0.0177612	-0.00980782	-0.00867017	-0.00842146	0.00285562	-0.0138942	-0.00664356	-0.00339001	-0.00969176
Clostridium_botulinum_A2_Kyoto_uid59229|purM	-3.57831	-0.0172526	0.00968672	-0.00741004	-0.00850077	0.0317091	0.0137986	-0.0036098	0.00395606	-0.00345398	-0.00115133	0.00118595	-6.05961e-05	-0.00541902	0.00442351	0.00535843	-0.00510738	-0.00386084	0	-0.0338213	0.0195293
Clostridium_botulinum_A2_Kyoto_uid59229|selD	-4.54017	0.0128854	-0.0060955	0.00977016	-0.0367852	-0.0118631	-0.0121524	0.0160779	-0.00301882	-0.0149205	0.00328887	-0.00882498	-0.00899858	0.0062884	0.0126154	0.0282881	-0.00924935	0.00648129	-0.0123839	0.00667419	0.0219226
Clostridium_botulinum_A2_Kyoto_uid59229|pheT	-2.76435	9.78781e-05	0.00232404	-0.00922558	0.0141172	0.0029409	-0.0229718	0.000887732	-0.0016571	-0.00198032	0.002299	-0.00487342	-0.00155922	0.00771416	-0.0128835	0.00964213	0.0109282	-0.00190521	0.00197805	0.000393789	0.00373302
Clostridium_botulinum_A2_Kyoto_uid59229|pheS	-2.44746	0.00329794	0.00769912	-0.0355044	0.0060472	0.0197463	-0.000902655	-0.00130383	0.00169912	-0.0255044	0.0222478	-0.0193038	-0.00975221	0.0193982	0.00719764	0.00414749	0.00814749	0.0110973	-0.0110501	-0.0059528	-0.00145133
Clostridium_botulinum_A2_Kyoto_uid59229|pyrE	-2.74978	-0.0126786	0.0364794	0.0126503	-0.00135843	0.00319796	0.0153672	0.0290364	0.0104712	-0.0196123	0.015537	-0.0398755	-0.0391963	0.00996179	0.0151974	0.00877317	0.0254988	-0.0386869	0	-0.0245083	-0.00625442
Clostridium_botulinum_A2_Kyoto_uid59229|gatB	-7.04224	0.0120406	0.00608303	0.0132635	-0.00504829	-0.00307287	0.0080898	-0.00112881	-0.00445253	0.00275931	-0.00899912	0.0136711	0.00968895	-0.0131067	-0.00912455	0.0120093	-0.00489151	-0.00498558	0.00203813	-0.0180296	-0.00680421
Clostridium_botulinum_A2_Kyoto_uid59229|lysC	-6.25232	0.00589744	-0.00318376	-0.0326068	0.0162179	-0.0229701	-0.0213248	0.0224359	-0.00495726	0.0198504	0.014359	-0.0144231	0.0287179	0.00717949	-0.0110043	0.0123504	-0.00632479	-0.00660256	-0.00213675	-0.0161538	0.0146795
Clostridium_botulinum_A2_Kyoto_uid59229|proS	0.840507	0.0234673	0.0164908	-0.0125432	0.0061579	-0.00430235	-0.0185374	-0.0156631	0.00328361	0.00710387	0.0138257	-0.0308805	-0.00122794	0.0140713	-0.00372931	0.00271057	0.000454794	-0.000200109	0.0100509	0.00181008	-0.0123431
Clostridium_botulinum_A2_Kyoto_uid59229|glyS	-3.73426	0.00214854	0.00159918	-0.0251052	0.00939186	-0.00140727	0.0129477	-0.0304633	-0.000142985	-0.00245709	-0.00627629	0.00632521	0.0165035	0.00675416	0.00361602	0.00828185	-0.00649077	-0.000357463	0.0146296	-0.00572693	-0.00377029
Clostridium_botulinum_A2_Kyoto_uid59229|spoVB	1.44678	0.0521685	0.00648682	-0.00582842	-0.00445417	0.00521862	-0.0229292	-0.00764897	0.00934579	0.00197521	0.0156117	-0.0282097	-0.00852389	0.0214401	0.00104284	-0.0428316	0.0143479	0.00142728	-0.00945626	0.00571353	-0.00489605
Clostridium_botulinum_A2_Kyoto_uid59229|prsA	-9.68685	-0.0474739	-0.0149535	0.0399245	0.00377468	-0.0235192	0.0153165	-0.0465302	-0.0119774	0.116797	0.00094367	-0.0156794	-0.00413763	0.0291812	-0.0244628	0.00079849	-0.0219222	0.007259	0.00297619	-0.011687	0.00537166
Clostridium_botulinum_A3_Loch_Maree_uid59149|nrdD	-6.13177	-0.00904173	0.00384328	0.00264476	-0.00395075	0.0108013	-0.00389793	0.0332417	-0.0100271	-0.00426404	-0.00223493	-0.00836779	0.0171909	-0.00493616	0.00477769	0.000672119	0.00882862	-0.0140799	-0.00748074	-0.0093532	-0.00436604
Clostridium_botulinum_A3_Loch_Maree_uid59149|ileS	-4.36825	0.00466415	0.00284545	0.00155037	-0.00891649	0.00461571	0.00563127	-0.0166758	-8.19907e-05	-0.00520082	-0.00201623	0.0112849	0.00169944	-0.00103793	0.00275228	-0.00311006	0.000844132	-0.000204977	-0.00202741	-0.00414799	0.00753197
Clostridium_botulinum_A3_Loch_Maree_uid59149|tpiA	-4.72926	-0.0100923	0.00282025	0.0302303	-0.00820436	-0.000279694	0.0201613	-0.0141246	-0.00121201	0.0412549	0.00685251	-0.0435624	-0.0232612	0.0264777	-0.0237973	-0.0307897	-0.00470819	0.000396233	0.00806452	-0.00270371	0.0264777
Clostridium_botulinum_A3_Loch_Maree_uid59149|hypB	-0.743386	-0.0131526	-0.00888853	0.0316704	-0.035414	-0.00418402	-0.00880846	-0.0308696	-0.0356742	-0.021901	0.00906871	0.0362148	-0.0086483	0.00902867	0.013533	0.0404388	0.0224816	-0.00426409	0.0134529	-0.00860826	0.00452434
Clostridium_botulinum_A3_Loch_Maree_uid59149|nifH	3.87941	0.0276505	0.00173217	0.0132286	-0.00128309	0.0102134	-0.00867367	-0.0499378	0.0088533	0.00601768	0.00100081	0.000449081	-0.0334116	-0.0167058	0.0041957	0.00109062	0.00739058	0.0210811	0	0.0156922	-0.00858386
Clostridium_botulinum_A3_Loch_Maree_uid59149|hypB	-0.743386	-0.0131526	-0.00888853	0.0316704	-0.035414	-0.00418402	-0.00880846	-0.0308696	-0.0356742	-0.021901	0.00906871	0.0362148	-0.0086483	0.00902867	0.013533	0.0404388	0.0224816	-0.00426409	0.0134529	-0.00860826	0.00452434
Clostridium_botulinum_A3_Loch_Maree_uid59149|argS	-4.24813	0.000376579	0.00182327	-0.01715	0.0197924	0.010949	0.0108643	-0.0138236	0.00185151	0.0288711	-0.0104877	0.0129135	-0.019124	6.59014e-05	0.00189859	-0.0157034	-0.0139836	-0.00332645	0.00534743	-0.00490495	0.0037501
Clostridium_botulinum_A3_Loch_Maree_uid59149|hypF	-5.84091	-0.0109783	0.00880438	-0.0216947	-0.00774217	-0.0067726	0.000629341	-0.0043351	0.0065378	0.0261384	0.00161169	-0.0122354	0.0156441	-0.00331442	-0.00170273	-0.00839707	-0.000405717	-0.00702178	0.00116604	0.00509702	0.0189713
Clostridium_botulinum_A3_Loch_Maree_uid59149|gldA	1.10535	0.0425054	0.0315805	-0.00371066	-0.00369474	0.0145878	0.0186011	-0.0486208	-0.00234106	-0.0156867	-0.00732577	0.000605173	-0.00501656	-0.0046662	-0.00135368	-0.0346382	-0.00533507	0.0205759	-0.000334438	0.01626	-0.011992
Clostridium_botulinum_A3_Loch_Maree_uid59149|hypB	-0.743386	-0.0131526	-0.00888853	0.0316704	-0.035414	-0.00418402	-0.00880846	-0.0308696	-0.0356742	-0.021901	0.00906871	0.0362148	-0.0086483	0.00902867	0.013533	0.0404388	0.0224816	-0.00426409	0.0134529	-0.00860826	0.00452434
Clostridium_botulinum_A3_Loch_Maree_uid59149|ffh	-1.99786	-0.00431081	0.00445434	-0.01317	-0.00210344	-0.002049	0.00895323	-0.0198515	0.00446424	-0.0152883	0.0112348	-0.00197971	0.0268003	-0.0110319	-0.0043801	0.015709	0.00896808	-0.011022	0	0.0179213	-0.0133185
Clostridium_botulinum_A3_Loch_Maree_uid59149|ftsY	-2.49592	0.0147635	0.00990099	-0.000858086	0.0236524	-0.00409241	0.0130033	0.0189439	0.00215622	-0.0266447	-0.0279428	-0.0187019	-0.00363036	-0.020264	-0.00693069	-0.00712871	0.0030363	0.0049945	0.00330033	0.0325413	-0.010099
Clostridium_botulinum_A3_Loch_Maree_uid59149|alaS	-5.34074	0.0165904	-0.00319743	0.000354561	0.00209931	0.00445752	0.00958208	-0.00108154	0.00252402	0.0138406	-0.00301504	-0.00566532	0.0200365	-0.00980782	-0.00867017	-0.00728381	0.00171796	-0.0161695	-0.00664356	2.29572e-05	-0.00969176
Clostridium_botulinum_A3_Loch_Maree_uid59149|purM	-3.57831	-0.0112103	0.00968672	-0.0134523	-0.00547962	0.0317091	0.0137986	-0.00965209	0.00395606	-0.00345398	0.00186982	-0.0018352	0.00296055	-0.00541902	0.00442351	0.00233728	-0.00510738	-0.00688198	0	-0.027779	0.0195293
Clostridium_botulinum_A3_Loch_Maree_uid59149|selD	-3.91905	0.0128854	-0.0060955	0.0128854	-0.0367852	-0.0118631	-0.0121524	0.0160779	-0.00301882	-0.0180357	0.00328887	-0.00882498	-0.00899858	0.0062884	0.0157306	0.0220576	-0.00613408	0.00648129	-0.0123839	0.00667419	0.0219226
Clostridium_botulinum_A3_Loch_Maree_uid59149|pheT	-2.7605	0.00130491	0.00356919	-0.0118715	0.0140267	0.00411934	-0.0242614	0.00328274	-0.00419664	-0.00461039	0.00352827	-0.00624722	-0.000372832	0.00768398	-0.0141858	0.0108349	0.0146541	-0.00196874	0.00197328	-0.000959361	0.0036965
Clostridium_botulinum_A3_Loch_Maree_uid59149|pheS	-2.34942	0.00329794	0.00769912	-0.0325546	0.0060472	0.0197463	-0.000902655	-0.00130383	0.00169912	-0.0284543	0.0222478	-0.0193038	-0.00975221	0.0193982	0.00719764	0.00709735	0.00814749	0.00519764	-0.0110501	-0.00300295	-0.00145133
Clostridium_botulinum_A3_Loch_Maree_uid59149|pyrE	-2.92339	-0.0126786	0.0364794	0.00741474	-0.00135843	0.00843356	0.0153672	0.0238008	0.0104712	-0.0196123	0.015537	-0.0398755	-0.0391963	0.00996179	0.0151974	0.00877317	0.0254988	-0.0386869	0	-0.0192727	-0.00625442
Clostridium_botulinum_A3_Loch_Maree_uid59149|gatB	-6.69283	0.0162423	0.00608303	0.0111627	-0.00714913	-0.000972031	0.0080898	-0.00322965	-0.00445253	0.000658472	-0.00899912	0.00946946	0.0138906	-0.0110059	-0.00912455	0.00990844	-0.00489151	-0.00708642	0.00203813	-0.0138279	-0.00680421
Clostridium_botulinum_A3_Loch_Maree_uid59149|lysC	-6.25232	0.00589744	-0.00318376	-0.0326068	0.0187179	-0.0229701	-0.0213248	0.0224359	-0.00745726	0.0198504	0.014359	-0.0144231	0.0312179	0.00717949	-0.0110043	0.00985043	-0.00632479	-0.00660256	-0.00213675	-0.0161538	0.0146795
Clostridium_botulinum_A3_Loch_Maree_uid59149|proS	0.770918	0.0255594	0.0164908	-0.0083591	0.00406585	-0.0063944	-0.0185374	-0.013571	0.00328361	0.00919593	0.0138257	-0.0308805	-0.00541204	0.0140713	-0.00372931	0.00271057	0.000454794	-0.000200109	0.0100509	-0.000281972	-0.0123431
Clostridium_botulinum_A3_Loch_Maree_uid59149|glyS	-4.02161	-0.00217112	0.00159918	-0.0251052	0.00939186	-0.00140727	0.0151075	-0.0283035	-0.000142985	-0.00245709	-0.00627629	0.00200555	0.0143437	0.00675416	0.00361602	0.0104417	-0.00649077	0.00396219	0.0146296	-0.00572693	-0.00377029
Clostridium_botulinum_A3_Loch_Maree_uid59149|spoVB	2.37961	0.0540377	0.00648682	-0.00582842	-0.00445417	0.00521862	-0.0266676	-0.0113873	0.011215	0.000106052	0.0137425	-0.0244714	-0.00852389	0.0214401	0.00104284	-0.0447007	0.0162171	0.00142728	-0.00945626	0.011321	-0.00676521
Clostridium_botulinum_A3_Loch_Maree_uid59149|prsA	-9.30886	-0.0413438	-0.0149358	0.0432472	0.00395236	-0.0204275	0.0154142	-0.0493109	-0.0119507	0.11439	0.000988091	-0.0124811	-0.00400437	0.026356	-0.0244006	-0.00500286	-0.0159343	-0.00450361	0.00298507	-0.00849758	0.0054605
Clostridium_botulinum_B1_Okra_uid59147|nrdD	-6.45856	-0.00904173	0.00384328	0.00404729	-0.00395075	0.0108013	-0.00389793	0.0360467	-0.0100271	-0.00566656	-0.00363746	-0.00977031	0.0171909	-0.00493616	0.00477769	0.000672119	0.00882862	-0.0154824	-0.00748074	-0.00795067	-0.00436604
Clostridium_botulinum_B1_Okra_uid59147|ileS	-4.17576	0.00273737	0.00284545	0.00251376	-0.0079531	0.0055791	0.00563127	-0.0176392	0.0008814	-0.00809099	-0.00105284	0.0112849	0.00169944	-7.4537e-05	0.00275228	-0.00311006	0.000844132	-0.00213176	-0.00202741	-0.00125781	0.00656858
Clostridium_botulinum_B1_Okra_uid59147|hypB	-0.148148	-0.00750483	-0.00704633	0.0185811	-0.0270029	0.00330598	-0.0140927	-0.0241795	-0.033832	-0.0241795	0.010111	0.0214044	-0.00656371	0.00282336	0.0199807	0.0416023	0.0136342	-0.000458494	0.0162162	-0.00468147	0.00188224
Clostridium_botulinum_B1_Okra_uid59147|nifH	5.61274	0.0276505	0.00173217	0.00921257	-0.00529915	0.0142294	-0.00867367	-0.0499378	0.0088533	0.0100337	0.00100081	0.000449081	-0.0334116	-0.0167058	0.0041957	0.00109062	0.00739058	0.0210811	0	0.0156922	-0.00858386
Clostridium_botulinum_B1_Okra_uid59147|hypB	-0.148148	-0.00750483	-0.00704633	0.0185811	-0.0270029	0.00330598	-0.0140927	-0.0241795	-0.033832	-0.0241795	0.010111	0.0214044	-0.00656371	0.00282336	0.0199807	0.0416023	0.0136342	-0.000458494	0.0162162	-0.00468147	0.00188224
Clostridium_botulinum_B1_Okra_uid59147|argS	-4.42543	0.000376579	0.00182327	-0.0135977	0.0180162	0.00917284	0.0108643	-0.008495	0.00185151	0.0270949	-0.0122639	0.0129135	-0.0209002	6.59014e-05	0.00189859	-0.0139272	-0.0122074	-0.00510265	0.00534743	-0.00668114	0.0037501
Clostridium_botulinum_B1_Okra_uid59147|hisA	-4.11749	0.0204383	0.00411509	-0.0251706	0.00387504	-0.00865883	0.00823017	0.0490895	-0.00416652	-0.0129111	-0.00421796	-0.000342924	0.0204211	-0.00420082	-0.0208155	0.0122252	0.0123453	-0.000120023	-0.00416652	-0.0541648	0.00819588
Clostridium_botulinum_B1_Okra_uid59147|hypF	-5.63591	-0.017136	0.0112674	-0.0204632	-0.00281606	-0.00430955	0.000629341	-0.000640522	0.00776932	0.0236753	0.00038016	-0.0122354	0.00948643	-0.00208289	0.00076032	-0.0133232	0.00082581	-0.00455873	0.00116604	0.00632855	0.0152767
Clostridium_botulinum_B1_Okra_uid59147|gldA	0.840097	0.0425054	0.0315805	-0.00105109	-0.00369474	0.0145878	0.0186011	-0.0486208	-0.00234106	-0.0183463	-0.00732577	0.000605173	-0.00501656	-0.0046662	-0.00401325	-0.0319786	-0.00533507	0.0205759	-0.000334438	0.01626	-0.011992
Clostridium_botulinum_B1_Okra_uid59147|hypB	-0.148148	-0.00750483	-0.00704633	0.0185811	-0.0270029	0.00330598	-0.0140927	-0.0241795	-0.033832	-0.0241795	0.010111	0.0214044	-0.00656371	0.00282336	0.0199807	0.0416023	0.0136342	-0.000458494	0.0162162	-0.00468147	0.00188224
Clostridium_botulinum_B1_Okra_uid59147|ffh	-1.77564	-0.00431081	0.00445434	-0.00871566	-0.00210344	-0.00650334	0.00895323	-0.0176244	0.00446424	-0.0152883	0.00900767	-0.00197971	0.0268003	-0.0110319	-0.0043801	0.015709	0.00896808	-0.011022	0	0.0179213	-0.0133185
Clostridium_botulinum_B1_Okra_uid59147|ftsY	-2.38627	0.0147635	0.00990099	-0.00415842	0.0269527	-0.00409241	0.0130033	0.0156436	0.00215622	-0.0266447	-0.0279428	-0.0187019	-0.00363036	-0.020264	-0.00693069	-0.00712871	0.0030363	0.00829483	0.00330033	0.0325413	-0.010099
Clostridium_botulinum_B1_Okra_uid59147|alaS	-5.79528	0.0154527	-0.00319743	0.00149222	0.00323696	0.00445752	0.00958208	5.61176e-05	0.00366167	0.0138406	-0.00187739	-0.00566532	0.0166236	-0.0109455	-0.00867017	-0.00614615	0.00285562	-0.0161695	-0.00664356	-0.0011147	-0.0108294
Clostridium_botulinum_B1_Okra_uid59147|purM	-3.87952	-0.0202737	0.00968672	-0.00741004	-0.00850077	0.0317091	0.0137986	-0.00663094	0.00395606	-0.00345398	0.00186982	0.00118595	-6.05961e-05	-0.00541902	0.00442351	0.00837957	-0.00510738	-0.00386084	0	-0.0338213	0.0195293
Clostridium_botulinum_B1_Okra_uid59147|selD	-4.33313	0.0128854	-0.0060955	0.00977016	-0.0367852	-0.0118631	-0.0121524	0.0160779	-0.00301882	-0.0149205	0.00328887	-0.00882498	-0.00899858	0.0062884	0.0126154	0.0251729	-0.00613408	0.00648129	-0.0123839	0.00667419	0.0219226
Clostridium_botulinum_B1_Okra_uid59147|pheT	-2.84831	9.78781e-05	0.00232404	-0.0104866	0.0141172	0.00167986	-0.0229718	0.000887732	-0.0016571	-0.00071929	0.002299	-0.00613445	-0.00155922	0.00771416	-0.0116225	0.00964213	0.0121892	-0.00190521	0.00197805	0.000393789	0.00373302
Clostridium_botulinum_B1_Okra_uid59147|pheS	-2.34942	0.00329794	0.00769912	-0.0355044	0.0060472	0.0197463	-0.000902655	-0.00130383	0.00169912	-0.0255044	0.0222478	-0.0193038	-0.00975221	0.0193982	0.00719764	0.00414749	0.00814749	0.0110973	-0.0110501	-0.0059528	-0.00145133
Clostridium_botulinum_B1_Okra_uid59147|pyrE	-2.57616	-0.0126786	0.0364794	0.00741474	-0.00135843	0.00843356	0.0153672	0.0290364	0.0104712	-0.0196123	0.015537	-0.0398755	-0.0391963	0.00996179	0.0151974	0.00877317	0.0254988	-0.0386869	0	-0.0245083	-0.00625442
Clostridium_botulinum_B1_Okra_uid59147|gatB	-7.25188	0.0141415	0.00608303	0.0132635	-0.00504829	-0.000972031	0.0080898	-0.00112881	-0.00445253	0.000658472	-0.00899912	0.0136711	0.0138906	-0.0131067	-0.00912455	0.00990844	-0.00699235	-0.00918726	0.00203813	-0.0159288	-0.00680421
Clostridium_botulinum_B1_Okra_uid59147|lysC	-6.50169	0.00589744	-0.00318376	-0.0326068	0.0187179	-0.0229701	-0.0213248	0.0249359	-0.00495726	0.0223504	0.014359	-0.0144231	0.0287179	0.00717949	-0.0110043	0.0123504	-0.00882479	-0.00660256	-0.00213675	-0.0186538	0.0121795
Clostridium_botulinum_B1_Okra_uid59147|proS	0.422971	0.0234673	0.0164908	-0.0104512	0.0061579	-0.0063944	-0.0185374	-0.0156631	0.00328361	0.00710387	0.0138257	-0.0308805	-0.00122794	0.0140713	-0.00372931	0.00271057	0.000454794	-0.000200109	0.0100509	0.00181008	-0.0123431
Clostridium_botulinum_B1_Okra_uid59147|glyS	-3.87794	0.00430837	0.00159918	-0.0251052	0.00939186	-0.00140727	0.0129477	-0.0304633	-0.000142985	-0.00245709	-0.00627629	0.00632521	0.0165035	0.00675416	0.00361602	0.00828185	-0.00649077	-0.000357463	0.0146296	-0.00788676	-0.00377029
Clostridium_botulinum_B1_Okra_uid59147|spoVB	1.69553	0.0521685	0.00648682	-0.00582842	-0.00445417	0.00521862	-0.0229292	-0.00577981	0.00934579	0.000106052	0.0156117	-0.0282097	-0.00852389	0.0214401	0.00104284	-0.0428316	0.0162171	0.00142728	-0.00945626	0.00384437	-0.00489605
Clostridium_botulinum_B1_Okra_uid59147|prsA	-9.88467	-0.0474739	-0.0149535	0.0399245	0.00377468	-0.0235192	0.0153165	-0.0465302	-0.0119774	0.116797	0.00094367	-0.0156794	-0.00413763	0.0291812	-0.0244628	0.00377468	-0.0219222	0.00428281	0.00297619	-0.011687	0.00537166
Clostridium_botulinum_B_Eklund_17B_uid59159|ileS	-3.14212	0.0131313	0.00566906	-0.000749934	-0.0081676	0.00919597	0.00162238	-0.00347309	0.00175603	-0.0122811	-0.00209759	0.00904747	-0.00525139	0.000811191	0.000684965	-0.00811562	0.00168178	0.0024707	-0.00116017	-0.00538505	0.000610714
Clostridium_botulinum_B_Eklund_17B_uid59159|nrdD	-6.00009	-0.012409	0.00698446	-0.010108	0.00549679	0.00639161	-0.0075773	0.0220835	-0.00251033	-0.00855364	-0.000424255	-0.00842581	0.00277155	-0.000296423	0.0124145	-0.00540415	0.0110955	0.00653982	-0.00740871	-0.011366	0.000705856
Clostridium_botulinum_B_Eklund_17B_uid59159|prsA	-4.29398	0.00867257	-0.00523194	-0.0198792	0.0163512	-0.00280712	0.0107916	-0.0146691	0.00103765	-0.0139591	0.0111411	-0.00560331	0.00137625	-0.00558147	-0.00454382	0.003812	0.0191474	-0.00524286	0	0.00763492	-0.00244667
Clostridium_botulinum_B_Eklund_17B_uid59159|glyS	-3.51874	0.00214854	0.003759	-0.0207855	0.00507221	-0.00140727	0.00646819	-0.0239839	-0.000142985	-0.0110964	-0.00627629	0.00632521	0.0143437	0.00891399	0.00145619	0.0147613	-0.0086506	0.00612202	0.0146296	-0.0143662	0.00270919
Clostridium_botulinum_B_Eklund_17B_uid59159|gatB	-5.7145	0.0141415	0.00608303	0.00906183	0.00335507	0.00322965	0.00598896	-0.00112881	-0.00655337	-0.0119466	-0.0195033	0.0178728	-0.00711777	-0.00680421	-0.00702371	0.00990844	0.00771353	0.00341779	0.00413897	-0.0201304	-0.00470337
Clostridium_botulinum_B_Eklund_17B_uid59159|speE	-7.53866	0.00658954	-0.00372233	0.0163984	-0.00804829	0.002666	0.00643863	0.00613682	0.00316901	0.00925553	0.0174547	-0.0225352	0.00643863	-0.0145372	-0.0112173	-0.0219316	0.00679074	-0.0115191	0.00342052	-0.01167	0.0204225
Clostridium_botulinum_B_Eklund_17B_uid59159|purM	-1.76447	-0.00857017	0.0095597	0.0011272	-0.00884552	0.0340226	0.0105234	-0.00419044	-0.00517997	-0.0190678	-0.00135092	-0.00529182	-0.00939622	-0.00845832	0.00424206	0.0020651	0.00382904	0.00493043	0.003003	-0.0222085	0.0192571
Clostridium_botulinum_B_Eklund_17B_uid59159|moaA	-10.899	-0.0363657	-0.00576315	-0.0307575	0.0200471	0.0142116	0.00313978	0.0483258	-0.0287331	0.0222883	0.0104728	-0.001353	0.0231146	-0.0048646	-0.0287331	0.0154097	0.0120427	-0.00359422	-0.003367	-0.0350953	0.00957427
Clostridium_botulinum_B_Eklund_17B_uid59159|alaS	-5.90892	0.0120398	0.000215543	-0.00533372	0.0100629	0.00900815	0.00844442	-0.00676982	0.00138636	0.00587704	-0.00529036	0.00912421	0.00297168	-0.0132208	-0.00980782	0.0120564	-0.00397032	-0.000242326	-0.00664356	-0.00907829	-0.0108294
Clostridium_botulinum_B_Eklund_17B_uid59159|sun	-3.87373	0.0194064	0.00913242	0.0148402	0.00228311	0.010274	-0.0182648	-0.00114155	0.00570776	0.00228311	-0.00228311	0.00913242	0.00913242	0.00342466	-0.00799087	-0.0251142	-0.00570776	-0.0228311	0.00913242	-0.010274	-0.00114155
Clostridium_botulinum_B_Eklund_17B_uid59159|ftsY	-4.15115	0.018337	0.00662252	0.00273731	0.0338484	-0.00715232	0.00317881	0.0259161	0.00217807	-0.0329065	-0.0278882	-0.00515085	0.0130243	-0.0201766	-0.016777	-0.0301545	0.0163797	0.00518028	0.00331126	0.0195585	-0.0100662
Clostridium_botulinum_B_Eklund_17B_uid59159|ffh	-2.13816	-0.00470993	0.00663717	-0.00923304	-0.0046706	0.0040708	0.00433628	-0.0136578	0.00440511	-0.0227237	-0.000196657	-0.0093412	0.0219764	-0.00905605	-0.00678466	0.0152507	0.00651917	-0.000226155	0	0.0241298	-0.00672566
Clostridium_botulinum_B_Eklund_17B_uid59159|hypB	-2.79132	-0.00501738	-0.00900759	0.0127212	-0.014183	-0.000592604	-0.00474083	-0.0187263	-0.0357933	-0.0275759	0.00865202	0.0214523	-0.0183312	-0.000118521	0.0131163	0.0352402	0.0175806	0.0216893	0.0132743	-0.0184102	0.00877054
Clostridium_botulinum_B_Eklund_17B_uid59159|hypF	-6.57097	-0.0211498	0.00862193	-0.0243402	0.0068081	-0.00093425	0.00966054	-0.0016896	-0.00281269	0.00114297	0.00868156	0.00108333	0.0255875	-0.00153555	-0.00562538	-0.0112706	0.00844303	-0.0159618	0.00125726	0.00185856	0.0121751
Clostridium_botulinum_B_Eklund_17B_uid59159|pheT	-3.02462	0.016638	0.0061454	-0.022877	0.0206201	0.00563195	-0.0241754	-0.0102416	-0.00793676	-0.00428558	0.0036238	-0.00337963	-0.003941	0.000189405	-0.0115332	0.00851182	0.0122976	0.00454344	0.00198761	0.00311035	0.00507058
Clostridium_botulinum_B_Eklund_17B_uid59159|argS	-5.48926	-0.00495202	-0.00172913	-0.026031	0.0215686	0.00562045	0.0108643	-0.008495	0.00185151	0.0182139	-0.0122639	0.00936113	-0.019124	0.0053945	0.00545099	0.00383483	-0.0104312	-0.0139836	0.00534743	0.00219985	0.0073025
Clostridium_botulinum_B_Eklund_17B_uid59159|pyrE	-3.54839	-0.0300917	0.00798745	-0.00801158	0.0147925	0.0288851	0.0249035	0.000217181	0.00446429	-0.0127172	0.0213803	-0.044667	-0.0275097	-0.00282336	0.00164093	-0.000482625	0.000699807	-0.00236486	0	-0.0152992	0.0389961
Clostridium_botulinum_B_Eklund_17B_uid59159|dcd	-6.19135	-0.0175655	-0.0127112	0.0409394	-0.0284247	0.0235984	-0.00230091	0.0360851	-0.00207644	-0.0335036	0.00855828	0.0370111	0.0226724	-0.00507885	0.0228969	-0.0420618	-0.00115046	-0.000448959	0.000925978	-0.0584769	0.0111117
Clostridium_botulinum_B_Eklund_17B_uid59159|spoVB	-0.954717	0.00775073	0.01932	0.00713957	-0.00123652	-0.00514978	-0.014606	0.0135448	0.00601202	-0.0208218	-0.00159657	0.00152077	0.0124789	0.0133079	-0.00067274	-0.0442587	0.0162358	0.0202912	-0.00745226	-0.00278571	-0.0190215
Clostridium_botulinum_B_Eklund_17B_uid59159|hemA	-6.24012	-0.0358919	0.00935489	-0.0219216	0.00425637	-0.00934183	0.000509198	0.0177305	-0.000744213	0.0122469	0.00387121	-0.0012273	0.00924391	-0.000868248	-0.00323798	0.00749435	0.00562076	-0.00198457	-0.000248071	-0.013324	0.0184617
Clostridium_botulinum_B_Eklund_17B_uid59159|recQ	-8.96578	-0.0305501	0.0110609	0.0185736	-0.0176992	-0.00840552	-0.000856117	0.0277529	-0.000695881	0.00927995	0.00420734	-0.00663834	0.0484279	-0.0106854	-0.00571355	-0.00289798	-0.0349177	-0.017539	0.00246305	-0.0127273	0.0275606
Clostridium_botulinum_E3_Alaska_E43_uid59157|ileS	-3.15266	0.0163327	0.00480385	-0.00211907	-0.00687998	0.00762119	0.00089057	-0.00594087	0.00188943	-0.0117753	-0.00294056	0.00951435	-0.00590539	0.000927911	0.000896171	-0.00686691	0.000905506	0.00182782	-0.00101566	-0.00304325	0.000877501
Clostridium_botulinum_E3_Alaska_E43_uid59157|nrdD	-5.85764	-0.0109825	0.00555792	-0.0115345	0.00549679	0.00924468	-0.0075773	0.0192304	-0.00251033	-0.00712711	-0.000424255	-0.00699928	0.00562462	0.00113011	0.00956148	-0.00540415	0.00681587	0.00653982	-0.00740871	-0.00851289	-0.000720677
Clostridium_botulinum_E3_Alaska_E43_uid59157|glyS	-3.8061	0.00214854	0.003759	-0.0207855	0.00507221	-0.00140727	0.00646819	-0.0239839	-0.000142985	-0.0132562	-0.00627629	0.00632521	0.0165035	0.00891399	0.00145619	0.0126015	-0.00649077	0.00612202	0.0146296	-0.0143662	0.00270919
Clostridium_botulinum_E3_Alaska_E43_uid59157|gatB	-5.92414	0.0120406	0.00608303	0.0111627	-0.000846607	0.00533049	0.00598896	0.000972031	-0.00655337	-0.0161483	-0.0195033	0.0178728	-0.00291609	-0.00680421	-0.00702371	0.0120093	0.00771353	0.00341779	0.00413897	-0.0222313	-0.00470337
Clostridium_botulinum_E3_Alaska_E43_uid59157|speE	-6.60298	0.00658954	-0.000201207	0.0128773	0.00251509	-0.000855131	0.00643863	0.00965795	0.00316901	0.00573441	0.0174547	-0.0260563	-0.00412475	-0.0110161	-0.0112173	-0.0184105	0.0103119	-0.0115191	0.00342052	-0.01167	0.0169014
Clostridium_botulinum_E3_Alaska_E43_uid59157|glnA	-7.99121	-0.0219053	0.000106287	-0.00166517	0.00490945	-0.00404397	-0.0108767	0.00263693	-0.00212068	0.0027584	0.009166	0.0207715	0.0251344	-0.00212068	-0.0064076	-0.00864975	0.0092571	-0.00196884	-0.00442357	-0.0242993	0.0137414
Clostridium_botulinum_E3_Alaska_E43_uid59157|purM	-2.16367	-0.00857017	0.0095597	-0.0018758	-0.00584252	0.0340226	0.0105234	-0.00118743	-0.00517997	-0.0190678	-0.00135092	-0.00529182	-0.00939622	-0.00845832	0.00424206	0.00506811	0.00382904	0.00192743	0.003003	-0.0252115	0.0192571
Clostridium_botulinum_E3_Alaska_E43_uid59157|alaS	-5.9468	0.0109021	0.000215543	-0.00874669	0.0112006	0.0101458	0.00844442	-0.00563216	0.00252402	0.00815235	-0.00756567	0.00798655	0.00524699	-0.0143584	-0.0109455	0.00636807	-0.00283266	0.00317064	-0.0055059	-0.00794064	-0.0108294
Clostridium_botulinum_E3_Alaska_E43_uid59157|sun	-3.87373	0.0194064	0.00913242	0.0148402	0.00228311	0.0125571	-0.0182648	-0.00114155	0.00570776	0.00228311	-0.00228311	0.00913242	0.00456621	0.00342466	-0.00799087	-0.0228311	-0.00570776	-0.0228311	0.00913242	-0.010274	-0.00114155
Clostridium_botulinum_E3_Alaska_E43_uid59157|ftsY	-4.92122	0.018337	0.00993377	-0.000573951	0.0371597	-0.0137748	0.00317881	0.0259161	0.00217807	-0.0329065	-0.0278882	-0.00515085	0.0163355	-0.0201766	-0.016777	-0.0268433	0.0163797	0.00518028	0.00331126	0.0162472	-0.0100662
Clostridium_botulinum_E3_Alaska_E43_uid59157|ffh	-2.94758	-0.00470993	0.00663717	-0.00923304	-0.0046706	0.0040708	0.00433628	-0.0114454	0.00440511	-0.0227237	-0.00240905	-0.0093412	0.030826	-0.00684366	-0.00678466	0.010826	0.00430678	-0.000226155	0	0.019705	-0.00672566
Clostridium_botulinum_E3_Alaska_E43_uid59157|hypB	-2.5291	-0.00866832	-0.00888853	0.0182175	-0.0129925	-0.00418402	0.000160154	-0.0308696	-0.0267056	-0.00844811	0.013553	0.0227619	-0.0310698	6.00577e-05	0.013533	0.0359545	0.00454436	0.0181574	0.0134529	-0.0175769	0.00900865
Clostridium_botulinum_E3_Alaska_E43_uid59157|hypF	-6.74104	-0.0198727	0.00989907	-0.0243402	0.0068081	-0.00093425	0.00966054	0.00214182	-0.00281269	0.00497438	0.00868156	-0.000193807	0.0217561	-0.00408983	-0.00562538	-0.00871635	0.00844303	-0.0159618	0.00125726	-0.00197286	0.0108979
Clostridium_botulinum_E3_Alaska_E43_uid59157|mch	-6.60455	-0.0116583	0.00332817	0.0349265	-0.00564048	-0.00546633	-0.00280573	0.0224265	0.0094911	-0.0117454	-0.0027767	-0.0241293	0.0065983	0.0032411	-0.0121517	-0.0180534	0.00957817	-0.00587268	0.00627902	-0.0115422	0.0159733
Clostridium_botulinum_E3_Alaska_E43_uid59157|pheT	-3.65593	0.016638	0.0061454	-0.0216127	0.0193558	0.00563195	-0.0241754	-0.01277	-0.00793676	0.000771313	0.0036238	-0.0021154	-0.003941	-0.00107482	-0.0127974	0.0072476	0.0110334	0.00327922	0.00198761	0.0056388	0.00507058
Clostridium_botulinum_E3_Alaska_E43_uid59157|argS	-4.72094	-0.00317582	-0.00172913	-0.026031	0.025121	0.00562045	0.0108643	-0.008495	0.00185151	0.0164377	-0.0122639	0.00936113	-0.0244525	0.0071707	0.00367479	0.00561103	-0.0104312	-0.0139836	0.00534743	0.00219985	0.0073025
Clostridium_botulinum_E3_Alaska_E43_uid59157|pyrE	-3.69654	-0.0300917	0.00798745	-0.0035473	0.0147925	0.0288851	0.0249035	0.000217181	0.00446429	-0.0127172	0.0213803	-0.044667	-0.0319739	-0.00282336	0.00164093	-0.000482625	0.000699807	-0.00236486	0	-0.0152992	0.0389961
Clostridium_botulinum_E3_Alaska_E43_uid59157|dcd	-7.34077	-0.0175655	-0.0127112	0.0351591	-0.0226444	0.0235984	-0.00230091	0.0418654	-0.00207644	-0.0392839	0.00855828	0.0370111	0.0226724	-0.00507885	0.0228969	-0.0420618	0.00462989	-0.000448959	0.000925978	-0.0642573	0.0111117
Clostridium_botulinum_E3_Alaska_E43_uid59157|spoVB	-0.821384	0.00975473	0.017316	0.00713957	-0.00123652	-0.00514978	-0.014606	0.0095368	0.00601202	-0.0188178	-0.00159657	0.00352478	0.0124789	0.0113039	-0.00067274	-0.0422547	0.0162358	0.0202912	-0.00745226	-0.00278571	-0.0190215
Clostridium_botulinum_E3_Alaska_E43_uid59157|hisA	-4.33248	0.00934923	0.0127283	-0.0111175	0.00948929	0.00583014	0.0127983	0.023128	-0.00407935	-0.0316543	-0.00386925	0.00983945	0.000980444	-0.00393928	-0.0246862	0.000700317	0.0128683	0.00470963	-0.00407935	-0.0445927	0.0255966
Clostridium_botulinum_E3_Alaska_E43_uid59157|hemA	-6.24012	-0.0309044	0.00935489	-0.0169341	0.00176261	-0.00684806	0.00300296	0.0202243	-0.00323798	0.00725934	-0.00111632	0.00126647	0.00924391	-0.000868248	-0.00323798	0.00250682	0.00811453	-0.0069721	-0.000248071	-0.0158178	0.0234492
Cronobacter_turicensis_z3032_uid40821|gldA	28.4777	0.0752827	0.0188044	-0.00454405	-0.0132895	0.0273132	0.00329586	-0.0685278	0.00628987	-0.0601168	0.0011095	0.0164467	-0.0231118	0.0256327	0.00494379	-0.0467621	0.0114702	0.00605329	0.00518037	0.0232097	-0.00868019
Cronobacter_turicensis_z3032_uid40821|ileS	24.0967	0.0626936	0.00331996	-0.0358452	0.00973098	0.0266669	-0.00670178	-0.0283289	0.00537586	-0.0345812	0.00450772	0.00945672	-0.03554	0.0126406	0.00686056	-0.00695335	0.0202249	-0.00308488	-0.00159193	0.00142284	-0.0102733
Cronobacter_turicensis_z3032_uid40821|speE	19.2721	0.0581349	0.00654762	-0.033631	0.0014881	0.0156746	0.0196429	-0.00873016	0.0236111	-0.0616071	0.0135913	-0.0236111	-0.00813492	0.0199405	-0.00823413	-0.0189484	0.0238095	-0.00188492	-0.000198413	-0.00912698	-0.00833333
Cronobacter_turicensis_z3032_uid40821|modF	27.1656	0.0337086	-0.00107534	-0.0439572	0.0101718	0.0030724	0.0120921	-0.0355959	0.0115325	-0.0797288	-0.00761516	0.0019422	-0.0174249	0.047677	0.00737376	0.0249303	0.0322163	0.00667149	0.0104132	-0.00916233	-0.00724208
Cronobacter_turicensis_z3032_uid40821|pheS	23.3703	0.0445688	-0.0069419	-0.0536636	0.0111621	0.0163364	0.00716208	-0.0290703	0.0176391	-0.0773028	0.00858104	-0.00119878	-0.00201223	0.0237554	0.0150459	-0.0184771	0.0313945	0.0283364	-0.00788379	-0.00083792	-0.00659327
Cronobacter_turicensis_z3032_uid40821|hypB	28.4887	0.0571736	0.00972906	-0.00387931	-0.0544027	0.00889778	-0.0115764	-0.0677956	-0.0205049	-0.0850369	0.00871305	0.034452	-0.00935961	0.034883	0.0407635	0.0166256	0.0417796	0.00951355	0.00689655	-0.0251847	0.00831281
Cronobacter_turicensis_z3032_uid40821|hypF	36.1541	0.111684	0.00804354	-0.0489301	-0.0021068	0.033281	-0.00228506	-0.0749061	0.0184791	-0.0842348	0.00669899	0.019204	-0.0555459	0.0276414	0.0435027	-0.0373283	0.0434908	0.000380277	0.0183365	0.00303373	-0.0284393
Cronobacter_turicensis_z3032_uid40821|hemA	27.7032	0.0373399	-0.00457837	-0.0155174	-0.0127437	0.0160521	-0.0269912	-0.0505403	0.0162081	-0.0737774	0.00197171	0.0448702	-0.0382756	0.0306116	0.00769745	0.0221121	0.0394564	0.00492369	0.00327504	0.0016598	-0.00375404
Cronobacter_turicensis_z3032_uid40821|argS	24.3687	0.0471796	-0.000168411	-0.0455169	0.0181547	0.01802	-0.00594032	-0.0273775	0.00839605	-0.0258802	0.00112682	0.0104139	-0.051742	0.0309601	0.0116938	-0.0131422	0.0113233	0.0113233	0.00339884	-0.00671501	0.00449198
Cronobacter_turicensis_z3032_uid40821|hisA	29.2593	0.0440173	0.00809552	-0.0545516	0.019392	0.0229317	0.00802778	-0.075434	0.00394614	-0.0877466	-0.0166653	0.0272165	-0.0376831	0.0487086	-0.00469134	0.0115674	0.0487764	0.00360742	0.00394614	0.0186468	0.00789229
Cronobacter_turicensis_z3032_uid40821|dcd	28.3289	0.0693194	-0.0139092	-0.00611198	0.0197948	0.0249761	-0.0174556	-0.021329	0.00130791	-0.0711806	0.00616228	0.0463555	-0.0323457	-0.0132552	0.03305	-0.0307108	0.0689924	-0.021983	0.0106897	-0.0200211	-0.0323457
Cronobacter_turicensis_z3032_uid40821|purM	26.6936	0.0356131	0.00592999	-0.0279889	0.00945974	0.0241518	-0.0112288	-0.0481126	0.00309788	-0.0509779	-0.0140941	0.0211868	-0.0254558	0.0146256	0.0147917	0.00339687	0.0175906	0.0062622	0.0144928	0.00695984	0.000298991
Cronobacter_turicensis_z3032_uid40821|pheA	24.8273	0.0479661	-0.00943469	-0.016182	-0.00819736	-0.010788	-0.0263321	-0.0314168	0.0302567	-0.0432294	0.00808135	0.0437128	-0.0455108	0.0461101	0.00786869	-0.000116	0.0231034	0.0222721	-0.00228134	-0.014732	-0.0211507
Cronobacter_turicensis_z3032_uid40821|ffh	23.1948	0.0260633	0.00220751	-0.0248565	0.0084621	0.00388521	0.0131126	-0.0425166	0.00880059	-0.0362178	0.0151582	-0.00956586	0.00198675	-0.00472406	0.00640177	-0.0180132	0.032936	-0.00916851	0	0.0416336	-0.015585
Cronobacter_turicensis_z3032_uid40821|alaS	22.3483	0.051157	-0.00771685	-0.0243254	0.000120436	0.0242293	0.00863165	-0.0350032	0.006041	-0.0371147	-0.00290583	0.00952466	-0.0070852	0.0165663	-0.00400512	0.00546445	0.0236195	-0.00796669	-0.00318898	-0.000761051	-0.0152812
Cronobacter_turicensis_z3032_uid40821|fni	30.5243	0.082575	-0.00825588	-0.0184195	-0.00151804	0.00764703	-0.0136299	-0.0778991	0.00333645	-0.0615172	0.0147339	0.0364005	-0.0474327	0.0263912	0.0120469	-0.0156025	0.0523278	0.000974145	0.00314162	0.0214718	-0.0167715
Cronobacter_turicensis_z3032_uid40821|nrdD	22.0422	0.0248635	0.0095165	-0.0139843	0.0018211	0.0138272	-0.000986355	-0.00586333	-0.00293167	-0.0321607	-0.00920416	-0.00954938	-0.00932289	0.00778125	0.0189252	-0.0160319	0.0272508	-0.00131514	-0.00465596	0.00625605	-0.00423585
Cronobacter_turicensis_z3032_uid40821|lysC	26.1838	0.0425641	0.00264957	-0.0187179	0.0042735	-0.0188034	0.00145299	-0.0558974	0.000598291	-0.0393162	-0.0100855	0.0586325	-0.0179487	0.00940171	0.00982906	-0.00820513	0.0281197	0.0181197	0.00230769	-0.00726496	-0.0017094
Cronobacter_turicensis_z3032_uid40821|ftsY	22.8197	0.0395311	0	0.00201835	0.00866463	0.00868502	0.0258716	-0.0193884	0.00778797	-0.0652192	-0.0260958	-0.0101937	-0.00275229	-0.000795107	-0.0058104	-0.013578	0.022263	0.00393476	0.0030581	0.0359021	-0.0138838
Cronobacter_turicensis_z3032_uid40821|pyrE	23.1702	0.037711	0.00398427	-0.0221799	0.00839995	0.0290318	0.0408324	-0.00994798	0.0234742	-0.0867656	0.0180688	-0.00411115	-0.0529121	0.035427	0.0166476	-0.0118005	0.0394112	-0.0226113	0	-0.0524806	0.00982109
Cronobacter_turicensis_z3032_uid40821|glnA	17.7113	-0.00697027	-0.00716628	-0.0106849	0.00566992	0.00938453	-0.0136298	0.00151548	0.016068	-0.0228183	0.0182002	-0.00116649	-0.00433132	-0.000989607	0.00588983	0.00364768	0.013276	0.00643961	-0.00918852	-0.0123773	0.00923155
Cytophaga_hutchinsonii_ATCC_33406_uid57651|purM	7.87817	-0.00293095	0.00126133	-0.0325248	-0.00228935	0.0135976	-0.00861786	-0.00868348	0.00570879	-0.0420832	-0.0038496	-0.0112061	-0.00100615	0.019073	0.0149245	0.0180888	0.0158869	0.0234986	0.00763359	-0.0264952	0.0200136
Cytophaga_hutchinsonii_ATCC_33406_uid57651|hemA	8.66073	0.00434863	-0.0013243	0.00693563	-0.0162981	-0.00867878	-0.00423776	-0.00771173	0.000763782	-0.0370065	-0.00944256	0.0320542	-0.0092393	0.0193225	0.0125285	0.0158793	0.00543887	0.00517401	0.00182322	-0.00479828	-0.00553126
Cytophaga_hutchinsonii_ATCC_33406_uid57651|ftsY	7.65807	0.0105556	0	-0.0147917	0.00694444	0.00125	0.02375	-0.0210417	0.0143056	-0.0386806	-0.0225694	-0.0267361	0.00416667	-0.0154167	-0.00833333	-0.000208333	-0.00166667	0.0238889	0.003125	0.0689583	-0.0075
Cytophaga_hutchinsonii_ATCC_33406_uid57651|pheA	4.60517	0.01871	-0.000959488	0.0180704	0.00133262	-0.0129531	0.00133262	0.00703625	0.013806	0.00719616	0.0175373	-0.0143923	-0.0431237	0.00277186	-0.0157249	0.0117271	0.0131663	-0.00159915	-0.000319829	-0.0320896	0.00847548
Cytophaga_hutchinsonii_ATCC_33406_uid57651|rfaG	11.4562	0.0630263	-0.00324622	-0.0110266	-0.00763727	-0.0386232	0.0102207	-0.0318897	0.0148979	-0.0242977	0.0264518	-0.0274008	-0.0507494	0.0236349	0.0223469	-0.0334187	0.0370038	0.0172855	0.0132259	0.01065	-0.0104542
Cytophaga_hutchinsonii_ATCC_33406_uid57651|hisA	5.39648	0.0293914	0.00835062	-0.0371196	0.00859267	-0.00376902	0.0333679	-0.0161653	0.00836791	-0.0453147	8.64454e-05	0.000345781	-0.0164246	0.0625692	-0.0165111	0.00433956	0.00421853	0.00845436	0.00420124	-0.0495505	0.0125692
Cytophaga_hutchinsonii_ATCC_33406_uid57651|alaS	5.16929	0.032694	-0.00773249	-0.0222196	0.00567313	-0.0101945	0.0119586	-0.0191439	0.00370837	-0.000746532	-0.00638131	0.0150252	-0.00147517	0.0141816	-0.00406246	0.00420691	0.00181136	-0.00352557	-0.00320983	0.000201973	-0.0107697
Cytophaga_hutchinsonii_ATCC_33406_uid57651|gatB	5.22838	0.0379091	-0.00461609	-0.0135449	0.000162662	-0.010428	0.00754402	0.00159145	-0.000562724	-0.0156068	-0.00958389	0.0203592	-0.00389071	0.00918383	-0.0078034	0.0192821	-0.0118568	-0.00175851	-0.000140681	-0.0171763	0.000936408
Cytophaga_hutchinsonii_ATCC_33406_uid57651|gldA	8.91531	0.0379058	0.0124409	-0.0174302	-0.00220307	0.000984902	0.0195814	0.0061038	0.000583166	-0.0280308	0.00184021	-0.0405624	-0.0488693	0.0287436	0.0051189	0.0017495	0.014955	0.0188168	-0.000673881	-0.0154993	0.00444502
Cytophaga_hutchinsonii_ATCC_33406_uid57651|argS	5.82899	0.005013	-0.0023927	-0.0391566	0.0102678	0.0193038	0.0158811	-0.0112465	0.0067997	0.00376117	-0.00603722	0.00812266	-0.0374809	0.0230592	0.0124585	-0.00147374	-0.0134173	-0.00375548	0.00451796	-0.00382092	0.0095964
Cytophaga_hutchinsonii_ATCC_33406_uid57651|glnA	3.71255	-0.0219585	0.0049539	-0.0136976	0.00365094	0.0248886	-0.0192402	-0.011806	0.00341945	-0.00614442	-0.00837996	0.00648174	0.00235459	0.00931915	-0.000714314	0.00589309	0.0135654	-0.0101525	0.00719605	-0.0106287	0.0209995
Cytophaga_hutchinsonii_ATCC_33406_uid57651|dcd	8.36804	-0.0175655	-0.0069308	0.0235984	-0.016864	0.0293788	-0.00808126	0.0129637	0.0152646	-0.0335036	0.00277793	0.0485717	-0.000448959	-0.0166395	0.0228969	-0.0247208	0.0104102	-0.01779	0.000925978	-0.0353555	0.0111117
Cytophaga_hutchinsonii_ATCC_33406_uid57651|prsA	3.65501	-0.045682	-0.000144678	-0.0247278	0.00999482	0.0134309	0.0448621	-0.0457784	-0.000144678	-0.000530485	-0.00355666	0.0201584	0.00658283	0.0102118	-0.00723388	-0.000385807	0.0101877	0.0100189	0	-0.000554598	0.00329142
Cytophaga_hutchinsonii_ATCC_33406_uid57651|glnA	3.71255	-0.0219585	0.0049539	-0.0136976	0.00365094	0.0248886	-0.0192402	-0.011806	0.00341945	-0.00614442	-0.00837996	0.00648174	0.00235459	0.00931915	-0.000714314	0.00589309	0.0135654	-0.0101525	0.00719605	-0.0106287	0.0209995
Cytophaga_hutchinsonii_ATCC_33406_uid57651|prsA	3.65501	-0.045682	-0.000144678	-0.0247278	0.00999482	0.0134309	0.0448621	-0.0457784	-0.000144678	-0.000530485	-0.00355666	0.0201584	0.00658283	0.0102118	-0.00723388	-0.000385807	0.0101877	0.0100189	0	-0.000554598	0.00329142
Cytophaga_hutchinsonii_ATCC_33406_uid57651|cysG	13.5064	0.066697	-0.00477309	-0.0385888	0.00121221	0.0160366	-0.044069	-0.00813193	0.0103543	-0.0328055	0.0204056	0.00161628	-0.0189913	0.035735	0.0307599	-0.0388918	-0.0193954	0.00568225	0.00507614	0.0166427	-0.00457105
Cytophaga_hutchinsonii_ATCC_33406_uid57651|pyrE	11.531	0.00150006	0.00894866	-0.025527	0.00460365	0.0212595	0.0178973	0.0152334	0.0143541	-0.052554	0.018518	-0.00700892	-0.0236648	0.0220613	0.0316307	-0.00620716	0.0166559	-0.017018	0.0191388	-0.0608819	0.00106039
Cytophaga_hutchinsonii_ATCC_33406_uid57651|ffh	4.74488	0.00553298	0.00225734	-0.0189466	0.0121645	-0.0100226	0.01386	-0.00314522	-0.00218711	-0.0204314	0.00295962	-0.0321043	0.0231001	0.00299473	-0.00173062	-0.00592927	0.0162227	-0.00596438	0	0.0278254	-0.00645598
Cytophaga_hutchinsonii_ATCC_33406_uid57651|proS	9.2232	0.0522448	0.00366156	-0.0232932	-0.00777916	-0.0057425	-0.00301957	-0.0194722	-0.00150978	-0.0117374	0.00473745	-0.0122864	-0.0020588	0.0173692	0.00132826	0.00567608	-0.000708403	0.0104135	0.00949703	-0.00194368	-0.0153768
Cytophaga_hutchinsonii_ATCC_33406_uid57651|modF	8.00604	0.00124341	0.00486459	-0.0422979	-0.00821308	-0.00734051	0.0138957	-0.0119324	0.0153682	-0.0379569	-0.00571535	-0.0248356	0.00835487	0.0512963	0.00314126	0.0364735	-0.00813673	0.0123469	0.00833306	-0.00551902	-0.00337031
Cytophaga_hutchinsonii_ATCC_33406_uid57651|ileS	8.2205	0.0297175	-0.00620001	-0.014796	0.000134177	0.00453239	0.00455852	-0.0134055	-0.00866398	-0.00682036	-0.00969732	0.0113162	-0.0121474	0.0166937	0.00655898	-0.00751041	0.0113946	0.00716887	-0.00539146	-0.00523115	-0.0022113
Cytophaga_hutchinsonii_ATCC_33406_uid57651|lysC	3.87181	0.0147263	-0.00167475	-0.00652576	0.002772	-0.0336683	0.00646801	-0.0169785	0.000808501	0.00843151	0.001386	0.00866251	-0.0107415	0.018711	0.014784	-0.00508201	0.0019635	0.0102218	0.0001155	-0.035343	0.0209633
Escherichia_coli_APEC_O1_uid58623|ileS	19.8013	0.0573631	0.00331996	-0.0358452	0.0129293	0.027733	-0.00563568	-0.0261967	0.00537586	-0.0345812	0.00237552	0.0115889	-0.0366061	0.0126406	0.00899275	-0.00695335	0.0180927	-0.00308488	-0.00159193	0.000356741	-0.0102733
Escherichia_coli_APEC_O1_uid58623|speE	13.1591	0.0581349	0.00654762	-0.033631	-0.00198413	0.0122024	0.0196429	-0.00525794	0.0270833	-0.0616071	0.0135913	-0.0270833	-0.00119048	0.0234127	-0.0117063	-0.012004	0.0203373	-0.0123016	-0.000198413	-0.00912698	-0.00486111
Escherichia_coli_APEC_O1_uid58623|modF	17.7821	0.0127021	-0.000944203	-0.0450801	0.00519683	0.00221181	0.0146574	-0.0307275	0.0139995	-0.0711721	-0.0134753	0.0123676	-0.0108435	0.052775	0.0121111	0.0261106	0.0211516	0.0095647	0.0106427	-0.0122932	-0.00895506
Escherichia_coli_APEC_O1_uid58623|prsA	15.9729	-0.00312245	-0.00903649	-0.0286603	0.0214022	0.00604845	0.0181867	-0.0378312	-0.00606913	-0.0529162	0.0187037	-0.0010546	0.00463198	0.00231599	0.00218158	0.00656541	0.0522441	-0.00775442	0	0.0266856	-0.0125208
Escherichia_coli_APEC_O1_uid58623|hemA	21.1941	0.0439265	-0.00591197	-0.0176858	-0.00107718	0.00379519	-0.0251384	-0.0420602	0.00582429	-0.0692778	0.000363236	0.0458679	-0.0369623	0.0390917	0.00821664	0.024199	0.0348957	0.00356973	0.00433378	0.00108971	-0.0170595
Escherichia_coli_APEC_O1_uid58623|pheS	21.5411	0.050685	-0.0069419	-0.0506055	0.00810398	0.0163364	0.00716208	-0.0290703	0.0176391	-0.0803609	0.00858104	-0.00119878	-0.00812844	0.0237554	0.0119878	-0.00624465	0.0313945	0.0222202	-0.00788379	-0.00083792	-0.00659327
Escherichia_coli_APEC_O1_uid58623|argS	18.371	0.0437134	-0.00190151	-0.0316521	0.0129554	0.0128207	-0.00594032	-0.0273775	0.0101292	-0.0276133	0.00632613	0.012147	-0.0430765	0.0344263	0.00996074	-0.0252739	0.0130564	0.00612404	0.00513194	-0.00671501	0.00275888
Escherichia_coli_APEC_O1_uid58623|hisA	22.1211	0.0476841	0.00804574	-0.0343757	0.00279999	0.0183855	0.00796141	-0.0756165	0.00389637	-0.0838309	-0.0126168	0.0186385	-0.029636	0.036248	-0.000759032	0.00322167	0.0403974	0.00753972	0.00389637	0.0303276	0.00779273
Escherichia_coli_APEC_O1_uid58623|dcd	26.9544	0.0693194	-0.0139092	-0.00093063	0.0146134	0.0197948	-0.0174556	-0.021329	0.00130791	-0.0711806	0.00616228	0.0515368	-0.0271643	-0.0236179	0.03305	-0.0151668	0.0689924	-0.0271643	0.0106897	-0.0200211	-0.037527
Escherichia_coli_APEC_O1_uid58623|purM	18.8015	0.00836676	0.00853868	-0.0231027	0.00266885	0.0311912	-0.0115186	-0.0402865	0.00280802	-0.0517233	-0.014384	0.0169218	-0.0201555	0.014253	0.014212	0.0141629	0.0170937	0.011314	0.0142857	0.00542775	-7.36799e-05
Escherichia_coli_APEC_O1_uid58623|pheA	15.0082	0.0376034	-0.0120254	-0.00322868	-0.0133787	-0.00560668	-0.0237414	-0.0288261	0.0276661	-0.0380481	0.0132627	0.0437128	-0.0506921	0.0383381	0.00527801	0.00765602	0.0282847	0.0196814	-0.00228134	-0.0199134	-0.0237414
Escherichia_coli_APEC_O1_uid58623|ffh	19.9643	0.0260633	0.00220751	-0.0248565	0.0106696	0.00388521	0.0131126	-0.0425166	0.00880059	-0.0406328	0.0173657	-0.0139809	0.00419426	-0.00693157	0.00640177	-0.0158057	0.0351435	-0.011376	0	0.0438411	-0.015585
Escherichia_coli_APEC_O1_uid58623|alaS	17.9869	0.0613213	-0.00772468	-0.0289791	0.00575383	0.0206964	0.00858468	-0.0339138	0.00829801	-0.0360331	-0.00293323	0.00828265	-0.0105555	0.0108064	-0.00403383	0.0122551	0.0235477	-0.0137345	-0.00319942	-0.00199132	-0.0164476
Escherichia_coli_APEC_O1_uid58623|hypF	25.7528	0.0746407	0.0139144	-0.0415305	-0.00377173	0.0177069	-0.00564981	-0.0742464	0.0178054	-0.0747549	0.00713878	0.0226874	-0.0430817	0.0444721	0.0356109	-0.0327419	0.0249079	-0.00417121	0.0200363	0.0239377	-0.0229105
Escherichia_coli_APEC_O1_uid58623|hypB	22.4177	0.036484	0.0131773	0.0133621	-0.0475062	0.00889778	-0.00812808	-0.0643473	-0.0136084	-0.0677956	0.00871305	0.0241071	-0.0197044	0.0176416	0.0407635	0.0269704	0.034883	0.00951355	0.00689655	-0.0251847	0.00486453
Escherichia_coli_APEC_O1_uid58623|sun	17.4942	0.0555689	0.00261839	-0.0226794	-0.00118147	0.0184165	-0.0269662	-0.0481767	0.0222164	-0.035428	-0.00408724	0.0231344	-0.0473704	0.0667928	0.0229348	-0.0105055	0.0160855	-0.0265351	0.02331	-0.0206358	-0.00751189
Escherichia_coli_APEC_O1_uid58623|pyrE	20.2263	0.0352343	0.00376891	-0.00555418	0.00721547	0.0268783	0.0442351	-0.00228118	0.0183486	-0.0692785	0.0175304	0.00280188	-0.0535581	0.0158939	0.0113067	-0.00818249	0.0380114	-0.0235805	0	-0.0630548	0.00426482
Escherichia_coli_APEC_O1_uid58623|glnA	13.456	-0.00270588	-0.00716628	-0.0106849	0.00780212	0.00725234	-0.0114976	0.00151548	0.0139358	-0.0228183	0.016068	0.000965703	-0.00433132	0.00114259	0.00375764	0.00364768	0.0154082	4.30264e-05	-0.00918852	-0.0102451	0.00709935
Escherichia_coli_APEC_O1_uid58623|gldA	21.4829	0.0781437	0.015427	-0.00452253	-0.014781	0.0348566	0.00236369	-0.0625906	0.00535771	-0.0586038	0.00308856	0.0154428	-0.0185944	0.0162465	0.00617712	-0.0589663	0.0102584	0.0066341	0.00490072	0.028774	-0.00961235
Escherichia_coli_APEC_O1_uid58623|lysC	18.1731	0.047256	0.000452097	-0.00965584	-0.00228428	-0.0186549	0.00599147	-0.0513392	0.00286011	-0.0481507	-0.00782365	0.0633887	-0.011193	0.00722403	0.0099033	-0.0080616	0.0282632	0.00271258	0.00231759	-0.00929416	-0.00391183
Escherichia_coli_APEC_O1_uid58623|nrdD	17.8466	0.016314	0.0094849	-0.0126806	0.00174011	0.0137166	-0.00103969	-0.00454181	-0.00578214	-0.0280242	-0.00782139	-0.0138735	-0.000963082	0.0119473	0.0174595	-0.0160951	0.0229425	1.82402e-05	-0.00326135	0.00616518	-0.00570553
Escherichia_coli_APEC_O1_uid58623|gldA	21.4829	0.0781437	0.015427	-0.00452253	-0.014781	0.0348566	0.00236369	-0.0625906	0.00535771	-0.0586038	0.00308856	0.0154428	-0.0185944	0.0162465	0.00617712	-0.0589663	0.0102584	0.0066341	0.00490072	0.028774	-0.00961235
Escherichia_coli_O157_H7_EDL933_uid57831|ileS	21.0438	0.0585339	0.00333589	-0.0357792	0.0130112	0.0278183	-0.00560041	-0.0282766	0.0054043	-0.0345118	0.00240283	0.00954319	-0.0365822	0.013742	0.00904054	-0.00796711	0.0181451	-0.0030314	-0.00156576	0.00257313	-0.0102358
Escherichia_coli_O157_H7_EDL933_uid57831|speE	14.0818	0.0581349	0.00654762	-0.033631	-0.00198413	0.0122024	0.0196429	-0.00525794	0.0270833	-0.0616071	0.0135913	-0.0270833	-0.0046627	0.0234127	-0.0117063	-0.00853175	0.0203373	-0.0123016	-0.000198413	-0.00912698	-0.00486111
Escherichia_coli_O157_H7_EDL933_uid57831|modF	18.0537	0.0127021	-0.000944203	-0.0430393	0.00315602	0.00425263	0.0126166	-0.0307275	0.0139995	-0.0732129	-0.0155162	0.0123676	-0.0108435	0.0588974	0.0141519	0.0240697	0.0191108	0.0095647	0.0106427	-0.0122932	-0.00895506
Escherichia_coli_O157_H7_EDL933_uid57831|prsA	15.8418	0.00506403	-0.00804419	-0.0281547	0.0278522	0.00507523	0.0147327	-0.0378122	-0.00804419	-0.054147	0.0150016	-0.00350673	0.00588189	0.00133323	-0.00671096	0.00534412	0.0525113	-0.00724873	0	0.0324008	-0.0115285
Escherichia_coli_O157_H7_EDL933_uid57831|hemA	21.9101	0.0442076	-0.00589476	-0.0127061	-0.00811079	0.00389845	-0.0250982	-0.0419225	0.00587593	-0.0667822	0.000420606	0.0461662	-0.0368878	0.0416274	0.00827401	0.0243826	0.0326754	0.00128065	0.00435672	0.00126182	-0.0170251
Escherichia_coli_O157_H7_EDL933_uid57831|pheS	20.9313	0.050685	-0.0069419	-0.0506055	0.00810398	0.0163364	0.00716208	-0.0290703	0.0176391	-0.0803609	0.00858104	-0.00119878	-0.00812844	0.0237554	0.0119878	-0.00624465	0.0313945	0.0222202	-0.00788379	-0.00083792	-0.00659327
Escherichia_coli_O157_H7_EDL933_uid57831|argS	18.3134	0.0441112	-0.0018774	-0.0331019	0.0149055	0.0130558	-0.00582578	-0.0272208	0.0119527	-0.0274143	0.00471962	0.0125027	-0.044695	0.0328499	0.0100753	-0.0251774	0.0115102	0.00803196	0.00516208	-0.00646182	0.00289753
Escherichia_coli_O157_H7_EDL933_uid57831|hisA	22.0778	0.0440173	0.00809552	-0.0341434	0.00306546	0.01885	0.00802778	-0.075434	0.00394614	-0.083665	-0.0125836	0.0190533	-0.0295199	0.0364637	-0.000609704	0.00748582	0.0406131	0.00768905	0.00394614	0.0268101	0.00789229
Escherichia_coli_O157_H7_EDL933_uid57831|dcd	26.9544	0.0693194	-0.0139092	-0.00093063	0.0146134	0.0197948	-0.0174556	-0.021329	0.00130791	-0.0711806	0.00616228	0.0515368	-0.0271643	-0.0236179	0.03305	-0.0151668	0.0689924	-0.0271643	0.0106897	-0.0200211	-0.037527
Escherichia_coli_O157_H7_EDL933_uid57831|purM	18.8902	0.0102381	0.00900652	-0.0216324	0.00719684	0.0250926	-0.0110508	-0.038883	0.000351883	-0.0505203	-0.0139161	0.0162034	-0.0193535	0.0119305	0.0151477	0.0154996	0.0178957	0.00666901	0.0146199	0.00497662	0.000527824
Escherichia_coli_O157_H7_EDL933_uid57831|pheA	15.0943	0.0355255	-0.0119714	-0.00283738	-0.0157805	-0.00536381	-0.023593	-0.0285292	0.0278685	-0.0404229	0.0133706	0.0443874	-0.0478856	0.038635	0.00548041	0.00540267	0.0285681	0.0225824	-0.00225435	-0.0195896	-0.023593
Escherichia_coli_O157_H7_EDL933_uid57831|ffh	19.8909	0.0260633	0.00220751	-0.0248565	0.0106696	0.00388521	0.0131126	-0.0425166	0.00880059	-0.0406328	0.0173657	-0.0139809	0.00419426	-0.00693157	0.00640177	-0.0158057	0.0351435	-0.011376	0	0.0438411	-0.015585
Escherichia_coli_O157_H7_EDL933_uid57831|alaS	17.5989	0.0519679	-0.00318447	-0.025726	0.00331471	0.0227663	0.00849107	-0.0306036	0.0082408	-0.0384333	-0.00298783	0.00694608	-0.00949978	0.0118543	-0.00522999	0.0109835	0.0256826	-0.0115632	-0.00435917	-0.00216554	-0.0164944
Escherichia_coli_O157_H7_EDL933_uid57831|hypF	25.4421	0.0749651	0.0126702	-0.0400688	-0.00496959	0.0192541	-0.00556781	-0.0741502	0.0152243	-0.0747085	0.00586605	0.0203309	-0.0403081	0.0446361	0.0371332	-0.0366563	0.027735	-0.00273449	0.0187565	0.0227862	-0.0201939
Escherichia_coli_O157_H7_EDL933_uid57831|hypB	21.6159	0.0368419	0.0167449	0.0136246	-0.0473152	0.00916028	-0.00803262	-0.0641683	-0.0169612	-0.0676285	0.00882044	0.020993	-0.0195255	0.017749	0.0409664	0.0271256	0.03505	0.00971639	0.00692042	-0.0249938	0.00491226
Escherichia_coli_O157_H7_EDL933_uid57831|sun	17.6493	0.0532379	0.00261839	-0.0226794	-0.00118147	0.0184165	-0.0269662	-0.0458457	0.0222164	-0.035428	-0.00641824	0.0184724	-0.0473704	0.0644618	0.0252658	-0.0128365	0.0184165	-0.0218731	0.02331	-0.0183048	-0.00751189
Escherichia_coli_O157_H7_EDL933_uid57831|pyrE	20.678	0.037711	0.00398427	-0.00809542	0.00839995	0.0290318	0.0455272	-0.00994798	0.0187793	-0.0679863	0.0133739	0.00997335	-0.0529121	0.0166476	0.0119528	-0.0164954	0.0347164	-0.0226113	0	-0.0571755	0.00512625
Escherichia_coli_O157_H7_EDL933_uid57831|glnA	13.8106	-0.00250086	-0.00714806	-0.0105209	0.00794335	0.00741635	-0.0113928	0.0016385	0.0140087	-0.022709	0.0161454	0.00111149	-0.00424476	0.00118815	0.00388065	0.00377525	0.015513	0.000134146	-0.00917941	-0.012236	0.0071768
Escherichia_coli_O157_H7_EDL933_uid57831|gldA	21.3219	0.0807323	0.0160796	-0.00181925	-0.0132895	0.0354876	0.00329586	-0.065803	0.00356508	-0.057392	0.0011095	0.0109971	-0.0176622	0.0174583	0.00766859	-0.060386	0.00874545	0.00605329	0.00518037	0.0286593	-0.00868019
Escherichia_coli_O157_H7_EDL933_uid57831|lysC	18.3953	0.047256	0.000452097	-0.00965584	-0.00228428	-0.0186549	0.0037643	-0.0513392	0.00286011	-0.0481507	-0.00782365	0.0633887	-0.011193	0.00722403	0.0099033	-0.00583443	0.0282632	0.00271258	0.00231759	-0.00929416	-0.00391183
Escherichia_coli_O157_H7_EDL933_uid57831|nrdD	17.4726	0.019123	0.0094849	-0.0126806	0.00174011	0.0137166	-0.00103969	-0.00313731	-0.00578214	-0.0280242	-0.00782139	-0.0138735	-0.000963082	0.0119473	0.0174595	-0.0174996	0.0229425	-0.00138625	-0.00326135	0.00476069	-0.00570553
Escherichia_coli_UTI89_uid58541|ileS	19.8013	0.0573631	0.00331996	-0.0358452	0.0129293	0.027733	-0.00563568	-0.0261967	0.00537586	-0.0345812	0.00237552	0.0115889	-0.0366061	0.0126406	0.00899275	-0.00695335	0.0180927	-0.00308488	-0.00159193	0.000356741	-0.0102733
Escherichia_coli_UTI89_uid58541|speE	13.1591	0.0581349	0.00654762	-0.033631	-0.00198413	0.0122024	0.0196429	-0.00525794	0.0270833	-0.0616071	0.0135913	-0.0270833	-0.00119048	0.0234127	-0.0117063	-0.012004	0.0203373	-0.0123016	-0.000198413	-0.00912698	-0.00486111
Escherichia_coli_UTI89_uid58541|modF	17.7821	0.0127021	-0.000944203	-0.0450801	0.00519683	0.00221181	0.0146574	-0.0307275	0.0139995	-0.0711721	-0.0134753	0.0123676	-0.0108435	0.052775	0.0121111	0.0261106	0.0211516	0.0095647	0.0106427	-0.0122932	-0.00895506
Escherichia_coli_UTI89_uid58541|prsA	16.0715	-0.00312245	-0.00903649	-0.0286603	0.0214022	0.00604845	0.0181867	-0.0378312	-0.00606913	-0.0529162	0.0187037	-0.0010546	0.00463198	0.00231599	0.00218158	0.00656541	0.0522441	-0.00775442	0	0.0266856	-0.0125208
Escherichia_coli_UTI89_uid58541|hemA	19.9309	0.0403379	-0.000692311	-0.0281251	-0.00607936	0.0020553	-0.0232898	-0.0436913	0.00495435	-0.0727576	-0.00289905	0.0578296	-0.0329389	0.0333283	0.00702047	0.0282225	0.0392454	0.00563584	0.00302886	0.00163342	-0.0128186
Escherichia_coli_UTI89_uid58541|pheS	21.5411	0.050685	-0.0069419	-0.0506055	0.00810398	0.0163364	0.00716208	-0.0290703	0.0176391	-0.0803609	0.00858104	-0.00119878	-0.00812844	0.0237554	0.0119878	-0.00624465	0.0313945	0.0222202	-0.00788379	-0.00083792	-0.00659327
Escherichia_coli_UTI89_uid58541|argS	18.371	0.0437134	-0.00190151	-0.0316521	0.0129554	0.0128207	-0.00594032	-0.0273775	0.0101292	-0.0276133	0.00632613	0.012147	-0.0430765	0.0344263	0.00996074	-0.0252739	0.0130564	0.00612404	0.00513194	-0.00671501	0.00275888
Escherichia_coli_UTI89_uid58541|hisA	22.1211	0.0476841	0.00804574	-0.0384408	-0.00126505	0.0183855	0.00796141	-0.0756165	0.00389637	-0.0797659	-0.0126168	0.0186385	-0.025571	0.036248	-0.000759032	0.00322167	0.0403974	0.00753972	0.00389637	0.0303276	0.00779273
Escherichia_coli_UTI89_uid58541|dcd	27.1262	0.0693194	-0.0139092	-0.00093063	0.0146134	0.0197948	-0.0174556	-0.021329	0.00130791	-0.0711806	0.00616228	0.0515368	-0.0271643	-0.0236179	0.03305	-0.0151668	0.0689924	-0.0271643	0.0106897	-0.0200211	-0.037527
Escherichia_coli_UTI89_uid58541|purM	18.6012	0.00662763	0.00882854	-0.0221918	0.00366264	0.0299489	-0.0112288	-0.039417	0.00309788	-0.0509779	-0.0140941	0.0182883	-0.0196587	0.0117271	0.0147917	0.0149911	0.0175906	0.00916075	0.0144928	0.00406129	0.000298991
Escherichia_coli_UTI89_uid58541|pheA	15.0082	0.0376034	-0.0120254	-0.00322868	-0.0133787	-0.00560668	-0.0237414	-0.0288261	0.0276661	-0.0380481	0.0132627	0.0437128	-0.0506921	0.0383381	0.00527801	0.00765602	0.0282847	0.0196814	-0.00228134	-0.0199134	-0.0237414
Escherichia_coli_UTI89_uid58541|ffh	19.9643	0.0260633	0.00220751	-0.0248565	0.0106696	0.00388521	0.0131126	-0.0425166	0.00880059	-0.0406328	0.0173657	-0.0139809	0.00419426	-0.00693157	0.00640177	-0.0158057	0.0351435	-0.011376	0	0.0438411	-0.015585
Escherichia_coli_UTI89_uid58541|alaS	17.9489	0.0613213	-0.00772468	-0.0289791	0.00575383	0.0206964	0.00858468	-0.0339138	0.00829801	-0.0360331	-0.00293323	0.00828265	-0.0105555	0.0108064	-0.00403383	0.0122551	0.0235477	-0.0137345	-0.00319942	-0.00199132	-0.0164476
Escherichia_coli_UTI89_uid58541|hypF	25.8543	0.0760464	0.0141315	-0.0429775	-0.00280015	0.0217275	-0.00660071	-0.0740707	0.0180225	-0.0752923	0.00639459	0.0190078	-0.0416554	0.0425703	0.033461	-0.0312742	0.0231301	-0.00403684	0.0206668	0.0256638	-0.0221146
Escherichia_coli_UTI89_uid58541|hypB	22.4177	0.036484	0.0131773	0.0133621	-0.0475062	0.00889778	-0.00812808	-0.0643473	-0.0136084	-0.0677956	0.00871305	0.0241071	-0.0197044	0.0176416	0.0407635	0.0269704	0.034883	0.00951355	0.00689655	-0.0251847	0.00486453
Escherichia_coli_UTI89_uid58541|sun	17.4942	0.0555689	0.00261839	-0.0226794	-0.00118147	0.0184165	-0.0269662	-0.0481767	0.0222164	-0.035428	-0.00408724	0.0231344	-0.0473704	0.0667928	0.0229348	-0.0105055	0.0160855	-0.0265351	0.02331	-0.0206358	-0.00751189
Escherichia_coli_UTI89_uid58541|pyrE	20.0549	0.037711	0.00398427	-0.00809542	0.00839995	0.024337	0.0455272	-0.000558305	0.0187793	-0.0679863	0.0133739	0.00527852	-0.0529121	0.0166476	0.0119528	-0.0118005	0.0347164	-0.0226113	0	-0.0618703	0.00512625
Escherichia_coli_UTI89_uid58541|glnA	13.456	-0.00270588	-0.00716628	-0.0106849	0.00780212	0.00725234	-0.0114976	0.00151548	0.0139358	-0.0228183	0.016068	0.000965703	-0.00433132	0.00114259	0.00375764	0.00364768	0.0154082	4.30264e-05	-0.00918852	-0.0102451	0.00709935
Escherichia_coli_UTI89_uid58541|gldA	21.4829	0.0781437	0.015427	-0.00452253	-0.014781	0.0348566	0.00236369	-0.0625906	0.00535771	-0.0586038	0.00308856	0.0154428	-0.0185944	0.0162465	0.00617712	-0.0589663	0.0102584	0.0066341	0.00490072	0.028774	-0.00961235
Escherichia_coli_UTI89_uid58541|lysC	18.1731	0.047256	0.000452097	-0.00965584	-0.00228428	-0.0186549	0.00599147	-0.0513392	0.00286011	-0.0481507	-0.00782365	0.0633887	-0.011193	0.00722403	0.0099033	-0.0080616	0.0282632	0.00271258	0.00231759	-0.00929416	-0.00391183
Escherichia_coli_UTI89_uid58541|nrdD	17.8466	0.016314	0.0094849	-0.0126806	0.00174011	0.0137166	-0.00103969	-0.00454181	-0.00578214	-0.0280242	-0.00782139	-0.0138735	-0.000963082	0.0119473	0.0174595	-0.0160951	0.0229425	1.82402e-05	-0.00326135	0.00616518	-0.00570553
Escherichia_coli_UTI89_uid58541|gldA	21.4829	0.0781437	0.015427	-0.00452253	-0.014781	0.0348566	0.00236369	-0.0625906	0.00535771	-0.0586038	0.00308856	0.0154428	-0.0185944	0.0162465	0.00617712	-0.0589663	0.0102584	0.0066341	0.00490072	0.028774	-0.00961235
Halobacterium_salinarum_R1_uid61571|dcd	34.6758	0.0324122	-0.0191436	0.0292009	0.0343291	0.0240727	-0.00751805	-0.0269355	-0.00403286	-0.0817028	-0.0043067	0.0246204	-0.0377396	0.0121733	0.0324122	-0.0363704	0.0629076	-0.00697038	-0.00485437	0.0203137	-0.0428678
Halobacterium_salinarum_R1_uid61571|gatB	30.9895	0.0888932	-0.00482436	0.0110099	0.0515216	0.000568586	0.00292046	-0.0383752	-0.000895953	-0.0657578	-0.0263703	0.0165062	-0.0271543	-0.00785251	-0.00863647	-0.000107687	0.0217786	0.00326075	0.00179621	-0.0104284	-0.00785251
Halobacterium_salinarum_R1_uid61571|proS	34.806	0.0583181	0.00146229	-0.0130652	0.0490888	0.0171527	-0.013894	-0.0406925	0.00802308	-0.0571943	-0.00776707	-0.0379458	-0.0126486	0.0227068	0.00841795	0.000789725	0.014406	-0.00897336	0.0170745	0.0148008	-0.0200599
Halobacterium_salinarum_R1_uid61571|purM	37.8876	0.106614	-0.00844017	-0.0255369	0.0428588	0.0528571	-0.00432829	-0.0761173	0.000934911	-0.100131	-0.0162571	0.00722825	-0.0332932	0.000623274	0.013487	-0.0127685	0.0220829	0.0263506	0.00302115	-0.00965209	0.0104658
Halobacterium_salinarum_R1_uid61571|tpiA	38.1386	0.137594	-0.00332235	-0.0446491	0.0483226	0.00318729	0.0046729	-0.0539949	0.00602345	-0.054238	-0.0126681	-0.0339528	-0.0402193	0.0129112	0.0180703	-0.0190697	-0.000864351	0.0133974	0	0.0105613	0.00823834
Halobacterium_salinarum_R1_uid61571|gltX	34.4657	0.0447314	-0.000476586	-0.00685361	0.0439689	0.0242536	-0.00541463	-0.0360453	0.00890447	-0.0784306	0.00198321	-0.0371891	-0.0262737	0.00416628	0.0217938	0.00141131	0.0276666	-0.000295176	0.00284107	0.0182763	-0.00901823
Halobacterium_salinarum_R1_uid61571|mch	34.1445	0.0774193	-0.015241	0.0247778	0.0282321	0.0160871	0.0141758	-0.0459618	0.00369327	-0.0772799	-0.0275054	0.000368331	-0.0275054	0.0101241	-0.00178193	-0.0325028	0.0136979	0.0433536	0.00333489	0.010373	-0.0178591
Halobacterium_salinarum_R1_uid61571|hemA	40.1308	0.123949	-0.0107954	-0.00020414	0.00991882	0.0364211	-0.0235362	-0.0788342	0.00722897	-0.091599	-0.00291801	0.00403478	-0.0543014	0.00461117	0.0118161	0.00727701	0.0364211	0.0177482	-0.00294202	0.0279432	-0.0222393
Halobacterium_salinarum_R1_uid61571|uppS1	38.1111	0.0978828	-0.00474112	-0.0223259	0.0467841	0.0169827	-0.012342	-0.0577965	0.000928156	-0.0814519	-0.00805238	-0.00150512	-0.0326861	0.00707405	-0.00619607	-0.0147251	0.055288	0.0326109	0.00519266	0.0098836	-0.0308047
Halobacterium_salinarum_R1_uid61571|gcp	36.7081	0.103205	-0.00696998	-0.0202514	0.0318863	0.0155727	-0.00100159	-0.0666401	0.00270293	-0.0872071	0.000713462	-0.0216371	-0.030528	0.0135421	0.0177954	-0.0189754	0.0499698	-0.00222271	0.000164645	0.0356457	-0.0157648
Halobacterium_salinarum_R1_uid61571|glnA	26.7044	0.0158827	-0.00908714	-0.00374351	0.0452283	0.00758578	-0.00547204	-0.000987732	0.00845499	-0.0453567	-0.00255823	-0.00559057	-0.00739812	0.00184706	-0.00755615	0.00341755	0.0170285	0.00585725	-0.00684499	-0.012396	0.00168902
Halobacterium_salinarum_R1_uid61571|ileS	33.7247	0.0659556	-0.00506336	0.00232108	0.0529926	0.0141308	-0.00503986	-0.0465283	0.00395705	-0.0846599	0.00295739	-0.00614617	-0.0365643	0.00869502	0.00814187	-0.0150039	0.0241924	0.00662159	0.00379436	0.0170556	-0.0118097
Halobacterium_salinarum_R1_uid61571|prsA	34.9414	0.0662145	-0.0137885	-0.0269074	0.043895	0.0119409	0.00393071	-0.0793954	0.00044639	-0.0695376	-0.00326113	-0.0088162	-0.0452218	0.00763823	0.0187608	0.0154252	0.0183888	0.0331444	0	0.0337396	-0.00659665
Halobacterium_salinarum_R1_uid61571|alaS	33.6968	0.0649524	-0.00596258	-0.0040185	0.0436966	0.0380913	-0.00452413	-0.0451954	0.0111709	-0.0746161	-0.00753016	-0.0181955	-0.0309388	0.00314481	0.00852694	-0.0115185	0.0264243	-0.00779323	-0.00372043	0.0205559	-0.00254988
Halobacterium_salinarum_R1_uid61571|hisA	37.7206	0.11548	-0.00414938	-0.0210384	0.057594	0.0202668	0.0123624	-0.0831419	-0.00416652	-0.116217	-0.00835019	-0.0127396	-0.0498268	0.0164603	-0.012551	-0.0125682	0.0288742	0.0412023	-3.42924e-05	0.0326121	-6.85848e-05
Halobacterium_salinarum_R1_uid61571|glyS	35.2923	0.0623125	-0.00526278	-0.00212326	0.0275479	0.0258118	-0.00713197	-0.059306	0.00167562	-0.0784335	-0.0105135	-0.000248016	-0.027923	0.00514179	0.0224545	-0.0105679	0.0206458	0.0172099	0.00171191	0.0206035	-0.0036053
Halobacterium_salinarum_R1_uid61571|lysC	33.7727	0.0526487	-0.00560762	-0.0266931	0.0502408	0.00590047	-0.0109441	-0.0365743	-0.00480498	-0.0650354	-0.00279839	-0.00331902	-0.0208252	-0.000130157	0.00949065	-0.00158358	0.0347412	0.0095015	0.00293939	0.0180594	-0.0052063
Halobacterium_salinarum_R1_uid61571|ftsY	33.1746	0.0830086	0.00268097	0.0259339	0.0731308	-0.0129759	0.0121716	-0.0518141	0.00627942	-0.111427	-0.0310396	-0.0280012	-0.0145666	-0.0171761	0.00151921	0.0056479	0.0108668	0.00787012	0	0.0444861	-0.00659517
Halobacterium_salinarum_R1_uid61571|pheS	36.3162	0.0954661	-0.00601594	-0.0443187	0.0655378	0.0236892	-0.0181434	-0.0521036	0.0118884	-0.106032	-8.76494e-05	0.00559363	-0.0340797	0.00790438	0.0098008	-0.0101434	0.0117849	0.0297131	-0.00403984	0.0136972	-0.000111554
Halobacterium_salinarum_R1_uid61571|pheT	36.0397	0.0625402	-0.00373427	-0.0360342	0.0727497	0.0109386	-0.0134217	-0.0498539	0.0119318	-0.0761434	-0.00931497	-0.00748445	-0.0436938	0.00315487	0.00950598	-0.0151026	0.0433882	0.0305458	0.00348595	0.00359419	0.00294794
Halobacterium_salinarum_R1_uid61571|argS	27.709	0.0466028	-0.00724914	-0.0213386	0.0727406	0.00228198	-0.00558875	-0.0153859	0.00805273	-0.0594491	-0.0159543	-0.00294277	-0.044458	0.0240826	0.00397317	-0.00704474	0.0114799	0.0162343	0.00439036	-0.0192834	0.00885632
Haloquadratum_walsbyi_DSM_16790_uid58673|lysC	13.0914	0.0353872	-0.00813274	-0.0263823	0.0456567	0.00891767	-0.0159166	-0.0260335	0.00289988	-0.0547924	-0.00268184	-0.000392465	-0.0155678	0.00758765	-0.00309611	-0.00377202	0.0248997	0.0175301	0.00296529	0.00843799	0.00248561
Haloquadratum_walsbyi_DSM_16790_uid58673|hisA	16.2512	0.0929969	0.00401389	-0.0300618	0.0398002	0.0025235	0.016191	-0.0591075	-0.00013549	-0.108155	-0.00442036	-0.00951816	-0.0376831	0.0119739	-0.00877297	0.00748582	0.0242866	0.0403421	-0.00013549	0.0186468	-0.00027098
Haloquadratum_walsbyi_DSM_16790_uid58673|pheS	14.4031	0.0581538	-0.00615385	-0.0316923	0.0576923	0.00946154	-0.0155385	-0.0241538	0.00707692	-0.102462	-0.000846154	0.004	-0.0270769	0.0166923	0.00423077	0.00592308	0.00607692	0.0541538	-0.00246154	-0.0100769	-0.003
Haloquadratum_walsbyi_DSM_16790_uid58673|pheT	14.8506	0.0411547	-0.0042558	-0.0433356	0.0423972	0.00381099	-0.0135451	-0.0354697	0.0121561	-0.0711748	-0.0105319	-0.00981731	-0.0293601	-0.000347236	0.0118921	0.0123226	0.0344969	0.0557615	0.0013746	-0.00246509	0.00493592
Haloquadratum_walsbyi_DSM_16790_uid58673|trkA	11.9955	0.0382843	0.000166816	0.00158475	0.00602623	-0.0122401	-0.00888296	-0.0621807	-0.00452489	-0.0858894	0.000166816	-0.0121567	-0.00385762	0.00938341	0.0235419	-0.0218738	0.0466668	0.0560502	0.00460829	0.0338428	-0.00871614
Haloquadratum_walsbyi_DSM_16790_uid58673|gatB	8.45156	0.0684753	-0.00484473	0.00675769	0.0311404	-0.0116626	0.00891997	-0.0263558	-0.00294467	-0.0537262	-0.028415	0.0122988	-0.0130984	-0.0038732	-0.00468567	0.0098915	0.0155917	0.0172596	0.00178399	-0.0146073	-0.00790546
Haloquadratum_walsbyi_DSM_16790_uid58673|dcd	14.8148	0.0339806	-0.0145631	0.0339806	0.0145631	0.00485437	-0.0194175	-0.00485437	0	-0.0776699	0	0.0242718	-0.0291262	0.0242718	0.0291262	-0.0145631	0.0291262	0.0242718	-0.00485437	-0.0145631	-0.038835
Haloquadratum_walsbyi_DSM_16790_uid58673|trkA	11.9955	0.0382843	0.000166816	0.00158475	0.00602623	-0.0122401	-0.00888296	-0.0621807	-0.00452489	-0.0858894	0.000166816	-0.0121567	-0.00385762	0.00938341	0.0235419	-0.0218738	0.0466668	0.0560502	0.00460829	0.0338428	-0.00871614
Haloquadratum_walsbyi_DSM_16790_uid58673|gcp	13.3522	0.0522487	-0.00886731	-0.0203572	0.00544706	0.00976431	-0.00105449	-0.0479348	0.0139035	-0.0853556	-0.00120856	-0.0142664	-0.0174265	0.00974035	0.0158311	0.00534435	0.0404267	0.0333329	0.000154065	0.0223326	-0.0120548
Haloquadratum_walsbyi_DSM_16790_uid58673|trkA	11.9955	0.0382843	0.000166816	0.00158475	0.00602623	-0.0122401	-0.00888296	-0.0621807	-0.00452489	-0.0858894	0.000166816	-0.0121567	-0.00385762	0.00938341	0.0235419	-0.0218738	0.0466668	0.0560502	0.00460829	0.0338428	-0.00871614
Haloquadratum_walsbyi_DSM_16790_uid58673|pheA	14.746	0.0559701	-0.0186567	0.0149254	0.0149254	0.0149254	-0.0261194	-0.0261194	0.011194	-0.0708955	-0.00373134	-0.0149254	-0.0559701	0.00746269	0.00373134	0.0335821	0.0522388	0.011194	-0.00373134	0.0186567	-0.0186567
Haloquadratum_walsbyi_DSM_16790_uid58673|minD	14.1419	0.102721	-0.0145821	-0.0320732	0.0475504	-0.0321975	0.00237441	-0.0793004	0.0123693	-0.0508323	-0.0156885	0.0290772	-0.0458348	-0.0131898	0.0108527	-0.000534553	0.0296118	0.0465683	0	0.028381	-0.0252732
Haloquadratum_walsbyi_DSM_16790_uid58673|proS	12.6202	0.0424592	0.00129076	0.00045856	0.0116168	0.00380435	-0.0165761	-0.0337806	-0.00633492	-0.0539742	-0.00806726	-0.0275136	0.00254755	0.0257982	0.00339674	0.0116508	0.00534986	0.0309273	0.0145211	0.00726902	-0.0148437
Haloquadratum_walsbyi_DSM_16790_uid58673|trkA	11.9955	0.0382843	0.000166816	0.00158475	0.00602623	-0.0122401	-0.00888296	-0.0621807	-0.00452489	-0.0858894	0.000166816	-0.0121567	-0.00385762	0.00938341	0.0235419	-0.0218738	0.0466668	0.0560502	0.00460829	0.0338428	-0.00871614
Haloquadratum_walsbyi_DSM_16790_uid58673|trkA	11.9955	0.0382843	0.000166816	0.00158475	0.00602623	-0.0122401	-0.00888296	-0.0621807	-0.00452489	-0.0858894	0.000166816	-0.0121567	-0.00385762	0.00938341	0.0235419	-0.0218738	0.0466668	0.0560502	0.00460829	0.0338428	-0.00871614
Haloquadratum_walsbyi_DSM_16790_uid58673|sun	14.4497	0.0488672	0.00873727	-0.0151036	0.00289779	0.0259923	-0.00948367	-0.047594	0.0318318	-0.0666052	-0.0145767	-0.0386372	-0.0112399	0.00851774	0.0232262	0.00610292	0.019582	-0.00118546	0.0224359	0.0178258	-0.0115911
Haloquadratum_walsbyi_DSM_16790_uid58673|purM	14.3965	0.0570217	0.000234588	-0.00701252	0.0276647	0.0192446	-0.00227886	-0.035959	-0.00257209	-0.088532	-0.0109921	0.00743142	-0.0164296	0.000234588	0.0180717	0.000879706	0.0149718	0.0476047	0	-0.035959	0.00637578
Haloquadratum_walsbyi_DSM_16790_uid58673|ileS	14.9374	0.0509997	-0.00593969	0.00147122	0.0428747	0.00915429	-0.00657896	-0.0226008	-0.00522372	-0.0797831	-0.00243652	-0.0130209	-0.0306656	0.0203177	0.00482098	-0.00512417	0.0257094	0.0185743	0.00221643	0.00102922	-0.00579449
Haloquadratum_walsbyi_DSM_16790_uid58673|mch	10.3791	0.0384218	-0.0184667	0.0501508	0.0119076	-0.0130785	0.0140212	-0.020362	0.00684687	-0.0676748	-0.0211261	6.9461e-05	-0.0147158	0.0132571	0.0109252	-0.0198162	0.0103795	0.0238549	0.00331428	0.00360205	-0.0115107
Haloquadratum_walsbyi_DSM_16790_uid58673|gltX	14.3635	0.0174277	-0.000476586	-0.0205055	0.0405559	0.00718876	-0.0105341	0.0014974	0.00890447	-0.0681917	-0.00654921	-0.0337761	-0.0143283	0.0024598	0.0217938	0.0218891	0.0191342	0.0287151	0.00454755	-0.00902746	-0.0107247
Haloquadratum_walsbyi_DSM_16790_uid58673|trkA	11.9955	0.0382843	0.000166816	0.00158475	0.00602623	-0.0122401	-0.00888296	-0.0621807	-0.00452489	-0.0858894	0.000166816	-0.0121567	-0.00385762	0.00938341	0.0235419	-0.0218738	0.0466668	0.0560502	0.00460829	0.0338428	-0.00871614
Haloquadratum_walsbyi_DSM_16790_uid58673|pyrE	12.6078	0.0247524	0.00364437	-0.029424	0.0834536	0.00300844	-0.00176104	-0.0123273	0.0135747	-0.0881252	0.0126941	-0.0348294	-0.0403571	0.0199829	0.00640822	0.0364437	0.032677	-0.00604134	0.0135747	-0.0230158	-0.0143329
Haloquadratum_walsbyi_DSM_16790_uid58673|argS	13.5557	0.0400669	-0.00212251	-0.0410155	0.0630351	-0.00443475	-0.00195651	-0.0221026	0.0110335	-0.0680271	-0.0200572	-0.0146027	-0.0425036	0.0245453	0.0173003	0.0057213	0.028067	0.0213556	0.00485569	-0.00064624	0.00148813
Haloquadratum_walsbyi_DSM_16790_uid58673|cysG	24.2928	0.0862504	-0.0104411	-0.018785	0.00307878	0.0274636	-0.0571805	-0.0412065	0.00798697	-0.102938	0.0174464	-0.0168217	-0.0198336	0.00350267	0.034402	-0.00385963	0.0538786	0.0418981	0.00896861	-0.00238717	-0.0114227
Haloquadratum_walsbyi_DSM_16790_uid58673|hemA	16.7634	0.0566575	-0.00868372	0.00708075	0.00682704	0.0334202	-0.0264663	-0.0201813	-0.000288304	-0.0857186	-0.00153378	-0.00364416	-0.0350232	0.0103098	0.0151302	0.0181286	0.0290149	0.0285998	-0.00303296	-0.00239869	-0.0181978
Haloquadratum_walsbyi_DSM_16790_uid58673|tpiA	13.3324	0.0955378	0.00135055	-0.0539949	0.0529955	-0.0108314	0.0046729	-0.0166117	-0.00799525	-0.0448922	-0.0126681	-0.0339528	-0.00283615	0.00823834	-0.00529415	0.00429474	0.00848144	0.00872454	0.0046729	-0.0128032	0.0129112
Haloquadratum_walsbyi_DSM_16790_uid58673|ftsY	12.4047	0.0517783	0	0.0126069	0.0485607	-0.017046	0.00179177	-0.0430831	0.00766209	-0.0943933	-0.0226527	-0.0360506	0.0102502	-0.00550444	-0.00669895	0.0241485	0.00723164	0.0263707	0.00242131	0.0332365	-0.00062954
Haloquadratum_walsbyi_DSM_16790_uid58673|glnA	7.6087	0.00833219	-0.0113283	0.0129927	0.0290403	-0.00618795	-0.0103198	0.0159986	0.0038381	-0.0434233	-0.00489553	0.000421016	0.00100848	-0.00271212	-0.00577672	0.00726497	0.0231363	0.0185345	-0.0069027	-0.0304404	0.0014197
Haloquadratum_walsbyi_DSM_16790_uid58673|prsA	12.222	0.0368857	-0.0140094	-0.0111018	0.0270095	0.00973207	0.00671633	-0.0391205	0.00323201	-0.0663102	0.0033041	-0.025039	-0.0280908	-0.00714886	0.00297969	0.00287156	0.0341944	0.0477352	0.00344828	0.0164124	-0.00370059
Haloquadratum_walsbyi_DSM_16790_uid58673|alaS	13.1629	0.0522443	-0.00971962	-0.0305085	0.0272106	0.0313139	-0.00581218	-0.00790195	0.00260133	-0.0726958	-0.0171971	-0.0275045	-0.0131046	-0.00487614	0.00725978	0.0171427	0.0214419	0.046258	-0.000195916	0.00647612	-0.0224324
Haloquadratum_walsbyi_DSM_16790_uid58673|glyS	12.3678	0.0273884	-0.00571267	0.00145855	0.0185155	0.0151933	-0.00749534	-0.0120331	0.000850822	-0.0672555	-0.0179078	-0.0199336	-0.0168949	0.0207033	0.00842719	0.0112633	0.00745483	0.0295357	0.00299814	0.00854874	-0.00510493
Heliobacterium_modesticaldum_Ice1_uid58279|alaS	28.2314	0.0536847	0.00128105	-0.0227542	-0.00046976	0.0256349	0.00939139	-0.0433449	0.00583391	-0.035326	-0.000858264	0.0211849	-0.0199051	0.00595961	0.00142959	-0.00745903	0.029845	-0.0118405	-0.00440432	0.00532987	-0.013213
Heliobacterium_modesticaldum_Ice1_uid58279|pyrE	30.2363	0.0239706	0.015537	-0.0292345	-0.00659403	0.0346116	0.0258384	-0.0442621	0.0209424	-0.103382	0.0103014	-0.00322626	-0.0601387	0.0151974	0.0413754	-0.00169803	0.0673836	-0.0125088	0.0052356	0.0173765	-0.0167256
Heliobacterium_modesticaldum_Ice1_uid58279|tpiA	26.6375	0.0368008	-0.00140479	0.00891233	-0.00460585	0.0186767	0.0239044	-0.00702393	-0.00937291	-0.0317113	0.00656334	-0.024365	-0.0396794	0.0380444	0.00773783	-0.0353039	0.0388273	-0.00819842	0.00796813	-0.0399097	0.01414
Heliobacterium_modesticaldum_Ice1_uid58279|argS	28.7306	0.048334	-0.00350533	-0.0420168	0.01624	0.0145014	0.00198332	-0.026257	0.0160611	-0.0404007	-0.00693534	0.0146897	-0.0422145	0.0284851	0.0107796	-0.0228082	0.0393023	-0.0122074	0.00712362	0.000423652	-0.00157849
Heliobacterium_modesticaldum_Ice1_uid58279|nifH	24.1297	0.0343675	-0.00475858	0.0138933	0.00939342	-0.0106871	-0.0111484	-0.0442672	0.00736849	-0.0104284	0.00358862	0.0151982	-0.0258178	0.00293615	0.00326239	-0.0123858	0.0240629	0.0247154	0	-0.013297	-0.00599604
Heliobacterium_modesticaldum_Ice1_uid58279|hemA	26.6418	0.0233308	0.00488852	-0.00884758	-0.034355	0.0303959	-0.0104241	-0.0208248	0.0224954	-0.067251	-0.00333549	0.0180952	-0.0388493	0.0311136	0.0135067	0.00831814	0.0326431	0.000811812	-0.00298841	0.0102182	-0.0089417
Heliobacterium_modesticaldum_Ice1_uid58279|hypB	28.0337	0.0197937	-0.00872472	0.00599315	-0.025053	0.0152275	-0.00375082	-0.0612769	-0.0218118	-0.0704093	0.00964204	0.0930569	-0.0348989	0.00487198	0.0141063	0.0141063	0.0551003	0.00112117	0.00913242	-0.011864	-0.00436236
Heliobacterium_modesticaldum_Ice1_uid58279|hypF	32.5342	0.0717908	-0.00061009	-0.0230313	0.00702448	0.0409359	0.000413386	-0.0675924	0.0044658	-0.0755005	0.00328096	0.0106558	-0.0579032	0.01039	0.0255193	-0.0284575	0.0671006	0.00233432	0.0105513	0.0197703	-0.021138
Heliobacterium_modesticaldum_Ice1_uid58279|speE	20.6088	0.043126	-0.00353303	0.00030722	-0.0212494	-0.0105351	0.00015361	0.00381464	0.00367384	-0.0319252	0.025128	-0.0283154	-0.0177675	-0.00705325	0.0145033	0.00378904	0.0179852	0.000243216	0.00360983	0.0110343	-0.00698925
Heliobacterium_modesticaldum_Ice1_uid58279|pheT	30.0841	0.0552975	-0.00289782	-0.029226	0.00228729	0.018285	-0.0297745	-0.0435514	-0.00211917	-0.053488	-0.00572928	0.0256557	-0.030155	0.0143918	0.00944114	-0.00165463	0.0501964	-0.00332696	0.00922436	0.0179045	-0.000760954
Heliobacterium_modesticaldum_Ice1_uid58279|pheA	26.8286	0.0321303	-0.0155621	0.00355305	-0.0215221	0.0228465	-0.00445724	-0.0346264	0.00587082	-0.0513728	0.00277622	0.033633	-0.0554225	0.0222989	0.0346773	-0.00850695	0.0489659	0.030946	-0.000636748	-0.0138302	-0.031761
Heliobacterium_modesticaldum_Ice1_uid58279|hemA	26.6418	0.0233308	0.00488852	-0.00884758	-0.034355	0.0303959	-0.0104241	-0.0208248	0.0224954	-0.067251	-0.00333549	0.0180952	-0.0388493	0.0311136	0.0135067	0.00831814	0.0326431	0.000811812	-0.00298841	0.0102182	-0.0089417
Heliobacterium_modesticaldum_Ice1_uid58279|fni	29.4548	0.0523581	-0.00885851	-0.0331609	0.00518823	0.0201865	-0.00967413	-0.0755504	-0.00363252	-0.0548805	0.00200128	0.0390892	-0.0300721	0.0124533	0.0257222	-0.0169392	0.0633916	-0.00203904	0.0101801	0.0240909	-0.0198542
Heliobacterium_modesticaldum_Ice1_uid58279|nrdD	22.1945	0.0261455	0.00105793	-0.0126806	-0.00106887	0.00809864	0.00457829	-0.00875529	-0.00437764	-0.0252152	0.00341456	-0.00404203	-0.000963082	0.00773384	0.010437	-0.0104772	0.0257515	-0.0126222	-0.00607033	0.00616518	-0.00711002
Heliobacterium_modesticaldum_Ice1_uid58279|ileS	27.3526	0.0703909	0.00762535	-0.0293028	0.000272777	0.0204252	0.00832383	-0.0228823	0.0107747	-0.0408525	-0.00611681	0.0074931	-0.0365583	0.0105722	0.0122936	-0.01753	0.0278129	-0.00618294	-0.00474466	-0.001616	-0.0101981
Heliobacterium_modesticaldum_Ice1_uid58279|ftsY	28.5474	0.0506871	0	-0.0110088	0.0102339	0.00552632	0.0161842	-0.0307456	0.0152924	-0.082924	-0.0312865	0.00402047	-0.0135965	0.00267544	-0.000438596	-0.0204386	0.0391228	0.00809942	0.00657895	0.0520175	-0.02
Heliobacterium_modesticaldum_Ice1_uid58279|ffh	24.2406	0.0214586	0.00440529	-0.0271953	-0.000489476	0.0169163	0.010837	-0.0514244	0.0109741	-0.0430445	0.0106216	0.00122369	-0.0157122	0.00839941	0.00851689	-0.0114831	0.0306021	-0.00926089	0	0.0502496	-0.0155947
Heliobacterium_modesticaldum_Ice1_uid58279|glnA	15.6315	-0.0104194	-0.00438285	-0.0127833	0.0118398	-0.00615831	-0.0107644	0.0072946	0.00244506	-0.0196924	0.0137573	0.0096585	-0.00638151	-0.00207982	0.0117992	-0.0108049	0.0229288	0.0094353	-0.00440314	-0.010602	0.00931356
Heliobacterium_modesticaldum_Ice1_uid58279|gatB	23.2045	0.0654129	0.00104269	-0.000276632	-0.0076691	0.00775421	0.0106142	-0.0148828	-0.00508152	-0.0242287	-0.0105716	0.0154659	-0.023501	-0.000183003	-0.00912035	0.0133805	0.00498789	-0.0153808	0.00172363	-0.0132954	0.00380901
Heliobacterium_modesticaldum_Ice1_uid58279|hisA	29.8013	0.0889152	0.00809552	-0.0382251	0.00714709	0.0229317	0.00394614	-0.0346177	-0.00421712	-0.0795834	-0.000338725	0.0190533	-0.0376831	0.0160556	-0.00877297	-0.0129223	0.052858	0.0158523	-0.00013549	-0.0262512	0.00789229
Heliobacterium_modesticaldum_Ice1_uid58279|purM	28.7611	0.0431209	0.00766437	-0.0149216	-0.0194545	0.0425885	0.0040005	-0.048374	-0.000798534	-0.0649005	-0.00432931	0.0128	-0.0325833	0.0158611	0.0233924	-0.00746082	0.0265239	0.011798	0.00546448	0.0035386	-0.00393004
Hydrogenobacter_thermophilus_TK_6_uid45927|pheT	13.5127	-0.00130872	5.38473e-05	-0.0219112	-0.00328702	0.0151522	-0.014506	-0.0352161	-0.00248634	-0.0279959	-0.00869048	0.0327368	-0.0323294	0.0122889	-0.0080209	0.0357967	0.039353	-0.00954501	0.00338301	0.0128929	0.0136397
Hydrogenobacter_thermophilus_TK_6_uid45927|prsA	8.14889	-0.0169029	-0.0111972	-0.024627	0.00897579	0.00225522	-0.00124037	-0.0114227	-0.00796094	-0.0281114	0.00548019	0.00674312	-0.00347304	-0.00173652	0.00648377	0.0219208	0.0303779	-0.0101936	0	0.0331292	0.00149972
Hydrogenobacter_thermophilus_TK_6_uid45927|nrdD	11.3313	-0.00384979	-0.00157474	0.00130426	-0.00591548	0.00496508	0.0152472	-0.000741056	-0.00678993	-0.0270986	-0.00185079	0.0101191	-0.0286122	0.00826278	0.0181207	-0.00825722	0.0239343	-0.00772551	-0.00170258	0.0185913	-0.00642681
Hydrogenobacter_thermophilus_TK_6_uid45927|ffh	8.95527	0.00665647	0	0.000489297	0.00407747	-0.0111927	0.0144037	-0.00409786	0.000142712	-0.0231702	-0.0077472	-0.00101937	-0.0126911	-0.0145566	-0.00122324	-0.00287462	0.0329664	-0.00982671	0	0.031315	-0.00165138
Hydrogenobacter_thermophilus_TK_6_uid45927|hemA	9.53694	0.00513294	-0.00573606	0.0013474	-0.0165922	0.00485063	-0.00757109	-0.023496	-0.00100092	-0.0143594	-0.00885433	0.036662	-0.0312981	-0.00116774	0.00145006	0.0162714	0.0244585	-0.00512011	0.0070193	0.0126527	0.00535109
Hydrogenobacter_thermophilus_TK_6_uid45927|lysC	10.5996	0.0234887	-0.00338449	-0.00244869	-0.00262025	-0.0149105	-0.0095608	-0.0101067	0.00694055	-0.0142554	0.00598914	-0.0136627	-0.022085	0.0139435	0.00325972	-0.00695614	0.0196363	-0.0130077	0.00516252	0.0206345	0.0139435
Hydrogenobacter_thermophilus_TK_6_uid45927|hisA	16.0442	0.00209257	0.000160967	-0.000769066	-0.00620618	0.0166333	0.0348047	-0.0556768	-0.00398841	-0.0382744	-0.00781585	0.0204607	-0.0494706	0.00495421	-0.00286164	0.0188511	0.0565174	-0.0118043	0.000321934	0.00849549	0.0135749
Hydrogenobacter_thermophilus_TK_6_uid45927|speE	7.35469	0.0178571	-0.00714286	-0.00357143	-0.0107143	-0.00714286	0.0214286	0.0107143	0.0178571	-0.0321429	0.00714286	-0.0428571	-0.0285714	0.00357143	0.0107143	0.00714286	0.0285714	-0.0428571	0	0.0357143	0.0142857
Hydrogenobacter_thermophilus_TK_6_uid45927|ileS	9.91104	0.00590131	0.00683276	-0.00657263	-0.0106845	0.00851316	-0.000723765	-0.0166319	0.00258458	-0.0236912	-0.00585725	0.0260472	-0.0307946	0.012111	0.00976978	0.00476216	0.0341281	-0.0163151	-0.00442021	-0.0113264	0.0163676
Hydrogenobacter_thermophilus_TK_6_uid45927|hypB	11.9731	-0.00472362	0.0111885	0.0246369	-0.0321392	-0.00472362	-0.00251926	-0.0621295	-0.00729846	-0.0413826	0.00672421	0.0236922	-0.0340842	-0.000944724	0.0194873	0.0402341	0.0322503	0.000685388	0.00414938	0.00677979	0.0201171
Hydrogenobacter_thermophilus_TK_6_uid45927|hypF	14.7111	0.015302	-0.000536636	-0.00329149	-0.00455879	0.00912107	0.00950563	-0.0549904	0.00470212	-0.0273982	0.00739754	0.0158806	-0.0521132	0.00335441	0.0201859	-0.0134858	0.0416986	-0.00915953	0.00813695	0.0327715	-0.00252237
Hydrogenobacter_thermophilus_TK_6_uid45927|nifH	8.77464	0.0324871	-0.000858841	0.0260973	-0.00374455	0.00170623	-0.00366439	-0.042942	0.0147263	-0.0201083	0.00786698	0.0061493	-0.0180815	-0.00366439	0.00389341	-0.0188601	0.0214252	0.0114512	0	-0.0014085	-0.0124704
Hydrogenobacter_thermophilus_TK_6_uid45927|purM	10.5771	-0.020735	0.00051473	0.000866462	-0.00302833	0.0306779	0.00141551	-0.0104662	0.000772095	-0.0163255	-0.00743785	0.00946245	-0.0334832	0.00350874	0.00115814	0.00193024	0.0277182	-0.0131685	0.00598802	0.0074979	0.0131342
Hydrogenobacter_thermophilus_TK_6_uid45927|moaA	6.09703	-0.037027	-0.00934495	-0.0265328	0.0243452	0.0277123	0.0202222	0.000403234	-0.02618	-0.0164318	-0.00223795	0.00265126	-0.0205649	-0.00223795	-0.032168	0.0351922	0.0497893	-0.00148188	0.00262102	0.0176213	-0.00635093
Hydrogenobacter_thermophilus_TK_6_uid45927|gatB	6.86058	0.0165888	-0.000126219	0.0160839	-0.0216285	-0.00690146	0.00827635	-0.0133341	-0.00437258	-0.0029436	-0.0172559	0.0480308	-0.00892547	-0.00451683	0.00592778	0.0102282	0.00383164	-0.0152499	0.0020781	-0.00915988	-0.00663099
Hydrogenobacter_thermophilus_TK_6_uid45927|gcp	8.675	0.0124997	-0.00923917	-0.0135793	-0.00616492	0.00379211	0.021854	-0.0276463	-0.00334824	-0.0373019	-0.00570461	0.0240514	-0.0174152	0.00224129	0.024857	0.0185057	0.00254269	-0.00604985	-0.00247145	0.0208621	-0.00228513
Hydrogenobacter_thermophilus_TK_6_uid45927|selD	8.88245	-0.00599965	-0.00924947	-0.00289406	-0.036969	0.00650924	-0.0153741	-0.00596119	0.00625925	-0.0369402	-0.00612465	0.0437379	-0.00603811	0.00934561	0.00939369	-0.0029806	0.0124704	0.0187585	3.84593e-05	0.00643232	0.0155856
Hydrogenobacter_thermophilus_TK_6_uid45927|pheA	8.75342	0.0137022	-0.0141236	0.0208153	-0.00265203	-0.00816167	-0.0136713	0.00233337	0.0163542	-0.00770939	0.0118211	0.0243719	-0.0399655	-0.00212779	-0.00327906	-0.00460507	0.0317318	-0.00150076	0.000801776	-0.0159738	-0.00816167
Hydrogenobacter_thermophilus_TK_6_uid45927|glnA	9.05882	-0.02616	-0.00929848	-0.00855269	0.00353772	-0.00340865	-0.000836624	0.0228374	0.00967137	-0.0206861	0.00540698	0.00949449	-0.0171245	0.0118036	0.0122864	0.0100443	0.013276	4.30264e-05	0.00147246	-0.0379636	0.0241569
Hydrogenobacter_thermophilus_TK_6_uid45927|pheS	8.33686	-0.00260177	0.00769912	-0.0148555	-0.00870206	0.0167965	0.0020472	-0.0101534	0.0134985	-0.0461534	0.0192979	0.00134513	-0.0274513	0.0193982	0.0130973	-0.0106018	0.0199469	-0.00955162	-0.00810029	0.017646	0.00739823
Hydrogenobacter_thermophilus_TK_6_uid45927|alaS	9.08343	0.00452549	-0.00883346	0.00932128	-0.0110615	0.0131839	0.0145611	-0.0118312	0.00614597	-0.0173554	-0.00738803	0.0110769	-0.022975	0.00529519	-0.00388966	0.00455252	0.033093	-0.0146139	-0.00314699	-0.000404154	-0.000256136
Hydrogenobacter_thermophilus_TK_6_uid45927|argS	7.58505	-0.00896539	-0.00701904	-0.00957783	0.00855816	0.00693567	0.0155772	-0.0252512	0.00401454	0.00230868	-0.0172831	0.0206018	-0.0450706	0.0130409	-0.00481938	-0.000371955	0.0265627	-0.00973495	0.00917061	0.00397927	0.017344
Klebsiella_pneumoniae_342_uid59145|tpiA	20.5714	0.0858438	-0.00557633	-0.00435226	-0.00124674	0.00927122	0.0235294	-0.016117	0.0140315	0.00308285	0.0022668	-0.033458	-0.0282897	0.0334353	-0.0245721	-0.0359288	0.00247081	-0.00888587	0.00784314	-0.0371756	0.0138275
Klebsiella_pneumoniae_342_uid59145|pyrE	24.8836	0.0330161	0.00398427	-0.00809542	-0.000989722	0.0290318	0.0408324	-0.000558305	0.0140845	-0.077376	0.0133739	0.000583682	-0.0623017	0.0307321	0.0166476	-0.0071057	0.0441061	-0.0226113	0	-0.0618703	0.0145159
Klebsiella_pneumoniae_342_uid59145|hypB	28.1451	0.0399323	0.0131773	0.00301724	-0.0509544	0.0123461	-0.00812808	-0.0746921	-0.0136084	-0.0781404	0.0018165	0.0310037	-0.026601	0.0279865	0.0373153	0.0200739	0.0486761	0.0302032	0.00689655	-0.0251847	0.00486453
Klebsiella_pneumoniae_342_uid59145|hypF	34.675	0.11191	0.0182262	-0.054595	0.00471215	0.0223735	-0.00809067	-0.0739561	0.00733233	-0.0813355	0.00464416	0.0196122	-0.0535333	0.0315259	0.0415464	-0.0311075	0.0428434	-0.00118196	0.0188643	0.00299151	-0.0227815
Klebsiella_pneumoniae_342_uid59145|alaS	23.3377	0.0660141	-0.00771685	-0.0323254	0.00697758	0.0242293	0.0120602	-0.0338603	0.00718386	-0.0371147	-0.00290583	0.00723895	-0.0116566	0.0154234	-0.00514798	0.00889302	0.0213338	-0.0125381	-0.00204612	-0.00418962	-0.0198527
Klebsiella_pneumoniae_342_uid59145|ffh	24.7535	0.0280666	0.00220264	-0.0271953	0.014929	0.00590308	0.0130396	-0.0426138	0.0109741	-0.0430445	0.0172296	-0.0119922	-0.00249633	-0.00922173	0.00631424	-0.0158884	0.0350073	-0.00926089	0	0.0436417	-0.0155947
Klebsiella_pneumoniae_342_uid59145|pheA	24.3967	0.0376034	-0.00943469	-0.0135914	-0.00560668	-0.00819736	-0.0289227	-0.0314168	0.0250754	-0.0380481	0.0132627	0.0385314	-0.0481015	0.0435194	0.0104594	0.00765602	0.0256941	0.0170907	-0.00228134	-0.0121414	-0.0211507
Klebsiella_pneumoniae_342_uid59145|purM	24.9595	0.0269175	0.00592999	-0.0366845	0.0152568	0.0241518	-0.0112288	-0.039417	0.00309788	-0.0509779	-0.0140941	0.0124912	-0.0225572	0.0146256	0.0118932	0.0149911	0.0146921	0.0062622	0.0144928	0.00695984	0.00319754
Klebsiella_pneumoniae_342_uid59145|dcd	30.3908	0.0745007	-0.0139092	0.00425072	0.00425072	0.0249761	-0.0122743	-0.021329	0.00130791	-0.0711806	0.00616228	0.0411741	-0.0323457	-0.0236179	0.048594	-0.0255295	0.0689924	-0.0271643	0.0106897	-0.0200211	-0.037527
Klebsiella_pneumoniae_342_uid59145|hisA	29.5303	0.0399356	0.00809552	-0.0341434	0.00306546	0.0229317	0.00802778	-0.0795156	0.00394614	-0.0877466	-0.0166653	0.0272165	-0.0376831	0.0405453	0.00347193	0.0115674	0.0446947	0.00768905	0.00394614	0.0227284	0.00789229
Klebsiella_pneumoniae_342_uid59145|nifH	22.176	0.0348603	0.00835251	0.0352964	-0.00631345	-0.0100863	-0.00827618	-0.0362996	0.00363105	-0.0122671	0.0160508	-0.0150258	-0.0165524	0.00878867	-0.00464513	-0.0169885	0.0156146	0.0194637	0	-0.00159199	-0.0140117
Klebsiella_pneumoniae_342_uid59145|argS	23.3883	0.0402472	-0.00190151	-0.0437838	0.0164216	0.0162869	-0.00767342	-0.0308437	0.00839605	-0.0276133	0.00285992	0.0156132	-0.0396103	0.0344263	0.00822764	-0.0148753	0.00959024	0.00612404	0.00339884	-0.0015157	0.00622508
Klebsiella_pneumoniae_342_uid59145|hemA	29.1496	0.0415341	-0.00591197	-0.00333175	-0.0154312	0.00618753	-0.0251384	-0.0468449	0.010609	-0.0740625	-0.00202911	0.0482602	-0.03457	0.041484	0.00821664	0.0218067	0.037288	0.00117738	0.00194143	0.0058744	-0.0170595
Klebsiella_pneumoniae_342_uid59145|pheS	24.0817	0.050685	-0.0069419	-0.0475474	0.0111621	0.0193945	0.00716208	-0.0321284	0.0176391	-0.0803609	0.00858104	-0.00119878	0.00104587	0.0206972	0.0119878	-0.015419	0.0283364	0.0191621	-0.00788379	0.00222018	-0.00659327
Klebsiella_pneumoniae_342_uid59145|speE	18.8521	0.0552697	0.00669331	-0.0402597	0.001998	0.00921578	0.0200799	-0.00484515	0.0344406	-0.0753746	0.0102647	-0.0265734	-0.000899101	0.00981518	-0.00796703	-0.0046953	0.0310939	-0.00841658	-0.00014985	-0.00514486	-0.00454545
Klebsiella_pneumoniae_342_uid59145|ileS	23.7417	0.0573631	0.00331996	-0.0411757	0.0171937	0.027733	-0.00456958	-0.0261967	0.00644195	-0.0367134	0.00450772	0.0115889	-0.03554	0.0115745	0.00686056	0.000509335	0.021291	-0.0105476	-0.000525832	-0.00177546	-0.0113394
Klebsiella_pneumoniae_342_uid59145|nrdD	22.288	0.024741	0.0094849	-0.0126806	0.00174011	0.0123121	0.000364804	-0.0073508	-0.00437764	-0.0294287	-0.00360791	-0.0138735	-0.00798555	0.0161608	0.016055	-0.0174996	0.0229425	-0.00419524	-0.00326135	0.00616518	-0.00570553
Klebsiella_pneumoniae_342_uid59145|lysC	25.9509	0.0539375	0.000452097	-0.0141102	-0.00451145	-0.0164278	0.0037643	-0.0513392	0.00286011	-0.0459235	-0.0100508	0.0589344	-0.0178745	0.0139055	0.0099033	-0.0147431	0.0282632	0.0183028	0.00231759	-0.0137485	-0.00391183
Klebsiella_pneumoniae_342_uid59145|recQ	25.3023	0.0324117	0.0143746	-0.0211431	-0.0184284	0.00731266	-0.00613872	-0.0452394	0.00672569	-0.0551079	0.0194556	0.028841	0.0041577	0.033763	0.0181716	-0.032803	0.0083154	-0.0154324	0.00657895	0.0087434	0.00544169
Klebsiella_pneumoniae_342_uid59145|gldA	29.1118	0.0861819	0.0188044	-0.00999364	-0.00783991	0.0354876	0.000571065	-0.0685278	0.0117395	-0.0546672	0.00928388	0.0137219	-0.020387	0.0120087	0.00494379	-0.0576612	0.00602066	0.00332849	0.00518037	0.0204849	-0.00868019
Klebsiella_pneumoniae_342_uid59145|glnA	16.0801	-0.00270588	-0.00716628	-0.00855269	0.00140553	0.00938453	-0.0114976	0.00364768	0.0139358	-0.0228183	0.0182002	-0.00116649	-0.00219913	-0.000989607	0.00588983	-0.000616711	0.013276	0.00857181	-0.00918852	-0.0145095	0.00709935
Klebsiella_pneumoniae_MGH_78578_uid57619|ileS	23.815	0.0601312	0.00357897	-0.0358568	0.0164305	0.0269513	-0.00506216	-0.0242241	0.00800757	-0.037791	0.00281954	0.0119474	-0.0373022	0.0110264	0.00434679	-0.00174543	0.0221976	-0.0108921	-8.18169e-05	-0.00156501	-0.0129166
Klebsiella_pneumoniae_MGH_78578_uid57619|speE	17.3422	0.0552697	0.00669331	-0.0402597	0.001998	0.00921578	0.0200799	-0.00134865	0.0344406	-0.0753746	0.0102647	-0.0265734	0.0025974	0.00981518	-0.00796703	-0.00819181	0.0310939	-0.00841658	-0.00014985	-0.00864136	-0.00454545
Klebsiella_pneumoniae_MGH_78578_uid57619|modF	27.4223	0.0208654	-0.000944203	-0.0552842	0.0133601	0.00629345	0.0126166	-0.0348091	0.0180811	-0.0711721	-0.0195978	0.00624512	-0.0169659	0.0425709	0.0121111	0.0363146	0.0191108	0.0095647	0.0106427	-4.83253e-05	-0.00895506
Klebsiella_pneumoniae_MGH_78578_uid57619|pheS	24.285	0.050685	-0.0069419	-0.0444893	0.00810398	0.0193945	0.00716208	-0.0321284	0.0176391	-0.0803609	0.00858104	-0.00119878	0.00104587	0.0206972	0.0119878	-0.015419	0.0283364	0.0191621	-0.00788379	0.00222018	-0.00659327
Klebsiella_pneumoniae_MGH_78578_uid57619|hemA	28.4336	0.0439265	-0.00591197	-0.000939402	-0.0202159	0.00618753	-0.0251384	-0.0468449	0.010609	-0.0716701	-0.00202911	0.0482602	-0.03457	0.0390917	0.00821664	0.0218067	0.037288	0.00117738	0.00194143	0.0058744	-0.0170595
Klebsiella_pneumoniae_MGH_78578_uid57619|prsA	17.3038	0.00792906	-0.00808541	-0.0282989	0.0243791	0.00486911	0.0210399	-0.0284441	-0.00808541	-0.0446038	0.018114	-0.0101849	-0.000703565	0.00445591	-0.00683463	-0.00126195	0.0490485	-0.00739301	0	0.0256299	-0.0115697
Klebsiella_pneumoniae_MGH_78578_uid57619|argS	24.7724	0.0402472	-0.00190151	-0.0420507	0.0164216	0.0162869	-0.00767342	-0.0291106	0.00839605	-0.0276133	0.00285992	0.0156132	-0.0413434	0.0326932	0.00822764	-0.0148753	0.00959024	0.00612404	0.00339884	-0.0015157	0.00622508
Klebsiella_pneumoniae_MGH_78578_uid57619|hisA	30.2078	0.0440173	0.00809552	-0.0382251	0.00306546	0.0229317	0.00802778	-0.0795156	0.00394614	-0.083665	-0.0166653	0.0272165	-0.0376831	0.0405453	0.00347193	0.00748582	0.0446947	0.00768905	0.00394614	0.0227284	0.00789229
Klebsiella_pneumoniae_MGH_78578_uid57619|dcd	30.3908	0.0745007	-0.0139092	0.00425072	0.00425072	0.0249761	-0.0122743	-0.021329	0.00130791	-0.0711806	0.00616228	0.0411741	-0.0323457	-0.0236179	0.048594	-0.0255295	0.0689924	-0.0271643	0.0106897	-0.0200211	-0.037527
Klebsiella_pneumoniae_MGH_78578_uid57619|purM	24.6705	0.0240189	0.00592999	-0.0395831	0.0181554	0.0241518	-0.0112288	-0.0365184	0.00309788	-0.0509779	-0.0140941	0.0124912	-0.0225572	0.0146256	0.0118932	0.0149911	0.0146921	0.00916075	0.0144928	0.00406129	0.00319754
Klebsiella_pneumoniae_MGH_78578_uid57619|pheA	25.258	0.0376034	-0.00943469	-0.016182	-0.00301601	-0.00560668	-0.0289227	-0.0314168	0.0250754	-0.0380481	0.0132627	0.0385314	-0.0481015	0.0435194	0.0104594	0.00506535	0.0256941	0.0170907	-0.00228134	-0.0121414	-0.0211507
Klebsiella_pneumoniae_MGH_78578_uid57619|ffh	24.9	0.0280666	0.00220264	-0.0271953	0.014929	0.00590308	0.0130396	-0.0426138	0.0109741	-0.0430445	0.0172296	-0.0119922	-0.00249633	-0.00922173	0.00631424	-0.0158884	0.0350073	-0.00926089	0	0.0436417	-0.0155947
Klebsiella_pneumoniae_MGH_78578_uid57619|alaS	23.1474	0.0637284	-0.00771685	-0.0334683	0.00926329	0.0242293	0.0120602	-0.0338603	0.00832671	-0.0371147	-0.00290583	0.00723895	-0.0105138	0.0131377	-0.00514798	0.00775016	0.0224766	-0.0113953	-0.00204612	-0.00418962	-0.0198527
Klebsiella_pneumoniae_MGH_78578_uid57619|hypF	35.0329	0.115942	0.0155381	-0.0519068	0.00336806	0.0264058	-0.00809067	-0.0712679	0.00867642	-0.0826796	0.00464416	0.0182681	-0.0575656	0.0288377	0.0428905	-0.0337957	0.0441875	-0.0065583	0.0188643	0.00702376	-0.0227815
Klebsiella_pneumoniae_MGH_78578_uid57619|hypB	29.0615	0.0433805	0.0131773	0.00301724	-0.0509544	0.0123461	-0.00812808	-0.0712438	-0.0136084	-0.0815887	0.0018165	0.0275554	-0.026601	0.0245382	0.0373153	0.0200739	0.0555727	0.0233067	0.00689655	-0.0217365	0.00486453
Klebsiella_pneumoniae_MGH_78578_uid57619|pyrE	25.3509	0.0330161	0.00398427	-0.00809542	-0.000989722	0.0290318	0.0408324	-0.00525314	0.0187793	-0.077376	0.0133739	0.00527852	-0.0576069	0.0260373	0.0166476	-0.0071057	0.0441061	-0.0273062	0	-0.0571755	0.00982109
Klebsiella_pneumoniae_MGH_78578_uid57619|tpiA	21.81	0.0900016	-0.00529285	-0.00236785	-0.000301785	0.0114446	0.0240964	-0.014416	0.0107714	0.00468928	-0.00127678	-0.0357732	-0.0274392	0.0343803	-0.0279267	-0.0349839	-0.000789284	-0.00784641	0.00803213	-0.0393017	0.0143
Klebsiella_pneumoniae_MGH_78578_uid57619|glnA	15.8885	-0.00321002	-0.00701828	-0.00935284	0.00244156	0.0107536	-0.0106466	0.00468372	0.0123586	-0.0219303	0.0188662	-0.00435785	-0.0014591	-0.000656596	0.00692587	-0.00182388	0.0140901	0.00729064	-0.00911452	-0.0155686	0.00772837
Klebsiella_pneumoniae_MGH_78578_uid57619|gldA	29.3835	0.0834571	0.0188044	-0.00999364	-0.00783991	0.0354876	0.000571065	-0.0685278	0.00628987	-0.057392	0.00928388	0.0137219	-0.0149374	0.0120087	0.00494379	-0.060386	0.0114702	0.00605329	0.00518037	0.0204849	-0.00868019
Klebsiella_pneumoniae_MGH_78578_uid57619|lysC	25.062	0.0517104	0.000452097	-0.0141102	-0.00451145	-0.0164278	0.0037643	-0.0513392	0.00286011	-0.0459235	-0.0100508	0.0589344	-0.0156473	0.0139055	0.0099033	-0.0147431	0.0282632	0.0183028	0.00231759	-0.0137485	-0.00391183
Klebsiella_pneumoniae_MGH_78578_uid57619|nrdD	23.3165	0.0233365	0.0094849	-0.0140851	0.00174011	0.0137166	0.000364804	-0.00875529	-0.00437764	-0.0308332	-0.00360791	-0.012469	-0.00658106	0.0175653	0.016055	-0.0160951	0.0229425	-0.00559974	-0.00326135	0.00616518	-0.00570553
Klebsiella_pneumoniae_NTUH_K2044_uid59073|glnA	15.7964	-0.00270588	-0.00716628	-0.00855269	0.00140553	0.00938453	-0.0114976	0.00364768	0.0139358	-0.0228183	0.0203324	-0.00329869	-0.00219913	-0.000989607	0.00588983	-0.000616711	0.013276	0.00857181	-0.00918852	-0.0145095	0.00709935
Klebsiella_pneumoniae_NTUH_K2044_uid59073|gldA	29.5647	0.0834571	0.0188044	-0.00999364	-0.00783991	0.0382124	0.000571065	-0.0685278	0.00628987	-0.057392	0.00928388	0.0137219	-0.0149374	0.0120087	0.00494379	-0.060386	0.0114702	0.00332849	0.00518037	0.0204849	-0.00868019
Klebsiella_pneumoniae_NTUH_K2044_uid59073|recQ	25.6854	0.0324117	0.0143746	-0.0194984	-0.0200731	0.00731266	-0.00613872	-0.0452394	0.00672569	-0.0551079	0.0194556	0.028841	0.0041577	0.033763	0.0198163	-0.032803	0.0083154	-0.0154324	0.00657895	0.00709866	0.00544169
Klebsiella_pneumoniae_NTUH_K2044_uid59073|lysC	25.1361	0.0517104	0.000452097	-0.0141102	-0.00451145	-0.0164278	0.0037643	-0.0513392	0.00286011	-0.0459235	-0.0100508	0.0589344	-0.0156473	0.0139055	0.0099033	-0.0147431	0.0282632	0.0183028	0.00231759	-0.0137485	-0.00391183
Klebsiella_pneumoniae_NTUH_K2044_uid59073|nrdD	23.5502	0.0233365	0.0094849	-0.0140851	0.00174011	0.0137166	0.000364804	-0.00875529	-0.00437764	-0.0308332	-0.00360791	-0.012469	-0.00658106	0.0175653	0.016055	-0.0160951	0.0229425	-0.00559974	-0.00326135	0.00616518	-0.00570553
Klebsiella_pneumoniae_NTUH_K2044_uid59073|ileS	23.6352	0.0594953	0.00331996	-0.0358452	0.0161276	0.0266669	-0.00456958	-0.0251306	0.00750805	-0.0377795	0.00344162	0.012655	-0.0366061	0.0105084	0.00579446	-0.000556763	0.021291	-0.00948147	-0.000525832	-0.00390765	-0.0124055
Klebsiella_pneumoniae_NTUH_K2044_uid59073|speE	17.4584	0.0552697	0.0031968	-0.0402597	0.001998	0.00921578	0.0200799	-0.00134865	0.0344406	-0.0753746	0.0102647	-0.0265734	0.0025974	0.00981518	-0.00796703	-0.0046953	0.0310939	-0.00841658	-0.00014985	-0.00864136	-0.00454545
Klebsiella_pneumoniae_NTUH_K2044_uid59073|modF	27.2593	0.020254	-0.0010103	-0.0556477	0.0127652	0.00770632	0.0123522	-0.0331814	0.0178167	-0.0714365	-0.0176065	0.00508838	-0.0171973	0.0421082	0.0117475	0.0356371	0.0186316	0.00911853	0.0105271	-0.000593645	-0.00707949
Klebsiella_pneumoniae_NTUH_K2044_uid59073|pheS	23.9948	0.0496133	-0.00697885	-0.0454502	0.00740181	0.0185076	0.00642296	-0.0326828	0.0172326	-0.0777462	0.0112326	-0.00234441	0.000380665	0.0202538	0.0113595	-0.0157885	0.0305076	0.0214441	-0.0079577	0.00144411	-0.00685196
Klebsiella_pneumoniae_NTUH_K2044_uid59073|hemA	28.5131	0.0439265	-0.00591197	-0.000939402	-0.0202159	0.00618753	-0.0251384	-0.0468449	0.010609	-0.0716701	-0.00202911	0.0482602	-0.03457	0.0390917	0.00821664	0.0218067	0.037288	0.00117738	0.00194143	0.0058744	-0.0170595
Klebsiella_pneumoniae_NTUH_K2044_uid59073|prsA	17.255	0.00577963	-0.00903649	-0.0286603	0.0214022	0.00308109	0.0181867	-0.0348639	-0.00606913	-0.0469815	0.021671	-0.00402196	-0.0042701	0.00231599	-0.000785781	0.00359805	0.0492768	-0.0018197	0	0.0237182	-0.0125208
Klebsiella_pneumoniae_NTUH_K2044_uid59073|argS	24.4264	0.0402472	-0.00190151	-0.0420507	0.0164216	0.0162869	-0.00767342	-0.0291106	0.00839605	-0.0276133	0.00285992	0.0156132	-0.0413434	0.0326932	0.00822764	-0.0148753	0.00959024	0.00612404	0.00339884	-0.0015157	0.00622508
Klebsiella_pneumoniae_NTUH_K2044_uid59073|hisA	29.9484	0.039554	0.00804574	-0.0303107	0.00686503	0.0224505	0.00796141	-0.0796815	0.00389637	-0.096026	-0.0166818	0.0267685	-0.033701	0.0403131	0.00330601	0.00728671	0.0444624	0.00753972	0.00389637	0.0262625	0.00779273
Klebsiella_pneumoniae_NTUH_K2044_uid59073|dcd	30.219	0.0745007	-0.0139092	0.00425072	0.00425072	0.0249761	-0.0122743	-0.021329	0.00130791	-0.0711806	0.00616228	0.0411741	-0.0323457	-0.0236179	0.048594	-0.0255295	0.0689924	-0.0271643	0.0106897	-0.0200211	-0.037527
Klebsiella_pneumoniae_NTUH_K2044_uid59073|purM	24.5742	0.0240189	0.00592999	-0.0395831	0.0181554	0.0241518	-0.0112288	-0.0365184	0.00309788	-0.0509779	-0.0140941	0.0124912	-0.0225572	0.0146256	0.0118932	0.0149911	0.0146921	0.00916075	0.0144928	0.00406129	0.00319754
Klebsiella_pneumoniae_NTUH_K2044_uid59073|pheA	25.0857	0.0350128	-0.00943469	-0.016182	-0.00301601	-0.00560668	-0.0289227	-0.0314168	0.0250754	-0.0380481	0.0132627	0.0385314	-0.0481015	0.0435194	0.0104594	0.00506535	0.0256941	0.0170907	-0.00228134	-0.00955069	-0.0211507
Klebsiella_pneumoniae_NTUH_K2044_uid59073|ffh	24.9732	0.0280666	0.00220264	-0.0271953	0.014929	0.00590308	0.0130396	-0.0426138	0.0109741	-0.0430445	0.0172296	-0.0119922	-0.00249633	-0.00922173	0.00631424	-0.0158884	0.0350073	-0.00926089	0	0.0436417	-0.0155947
Klebsiella_pneumoniae_NTUH_K2044_uid59073|alaS	23.0332	0.0637284	-0.00771685	-0.0334683	0.00926329	0.0242293	0.0120602	-0.0338603	0.00718386	-0.0371147	-0.00290583	0.00723895	-0.0105138	0.0142806	-0.00514798	0.00775016	0.0224766	-0.0113953	-0.00204612	-0.00418962	-0.0198527
Klebsiella_pneumoniae_NTUH_K2044_uid59073|hypF	34.8092	0.114598	0.0155381	-0.0519068	0.00336806	0.0264058	-0.00809067	-0.0712679	0.00867642	-0.0799914	0.00598824	0.0182681	-0.0575656	0.0274936	0.0428905	-0.0337957	0.0441875	-0.00790239	0.0188643	0.00702376	-0.0227815
Klebsiella_pneumoniae_NTUH_K2044_uid59073|hypB	29.0615	0.0433805	0.0131773	0.00301724	-0.0509544	0.0123461	-0.00812808	-0.0712438	-0.0136084	-0.0815887	0.0018165	0.0275554	-0.026601	0.0245382	0.0373153	0.0200739	0.0555727	0.0233067	0.00689655	-0.0217365	0.00486453
Klebsiella_pneumoniae_NTUH_K2044_uid59073|pyrE	23.4724	0.0337297	0.00659459	-0.0132973	0.000756757	0.0191351	0.0451892	-0.00767568	0.016	-0.0683243	0.0145946	-0.0107027	-0.0610811	0.0317838	0.0197838	0.00994595	0.0383784	-0.0168649	0	-0.0655135	0.00756757
Klebsiella_pneumoniae_NTUH_K2044_uid59073|tpiA	21.3527	0.0858438	-0.00557633	-0.00435226	-0.00124674	0.00927122	0.0235294	-0.016117	0.0140315	0.00308285	0.0022668	-0.033458	-0.0282897	0.0334353	-0.0245721	-0.0359288	0.00247081	-0.00888587	0.00784314	-0.0371756	0.0138275
Lactobacillus_casei_BL23_uid59237|nrdD	12.3404	0.0201933	0.00764572	-0.0279426	0.0156827	-0.00303685	0.00367995	-0.00441237	-0.00908376	-0.00035549	-0.00954465	-0.0195359	-0.0145019	0.0125404	0.0152146	-0.0156469	0.0106343	0.0168277	-0.0020597	0.00345665	0.000244735
Lactobacillus_casei_BL23_uid59237|glnA	9.95642	0.0266249	-0.0112208	-0.0359898	0.0200038	-0.00462977	-0.0247439	-0.0001254	0.00219199	-0.0135883	0.00666627	0.0378808	-0.0179974	0.0268005	0.00211675	0.00434887	-0.00454951	0.00437897	-0.00674151	-0.0292583	0.0178319
Lactobacillus_casei_BL23_uid59237|alaS	11.9369	0.0414226	-0.014574	-0.0396029	0.00535215	0.0156378	0.00948652	-0.0228287	0.00361518	-0.0136362	-0.0064745	-0.000155246	-0.00735762	0.0310109	0.0139848	0.00284405	-0.00178023	-0.00264935	0.00242412	-0.00356047	-0.013159
Lactobacillus_casei_BL23_uid59237|rfaG	18.4557	0.0545792	-0.0112676	-0.00442856	0.0444818	-0.02133	-0.0171957	-0.0516572	0.0197533	-0.0526452	0.00929157	-0.0337327	-0.0868124	0.0313503	0.0134609	-0.0266344	0.0413005	0.0414827	-0.000329339	0.0459814	0.00435148
Lactobacillus_casei_BL23_uid59237|rfaG	18.4557	0.0545792	-0.0112676	-0.00442856	0.0444818	-0.02133	-0.0171957	-0.0516572	0.0197533	-0.0526452	0.00929157	-0.0337327	-0.0868124	0.0313503	0.0134609	-0.0266344	0.0413005	0.0414827	-0.000329339	0.0459814	0.00435148
Lactobacillus_casei_BL23_uid59237|gatB	10.9871	0.0309482	-0.0149254	-0.0224508	0.0138593	0.00953217	0.0122915	-0.00953217	0.00815251	-0.0266525	-0.0153016	0.00316694	-0.017622	0.0310109	0.00558134	0.00570676	-0.00699235	0.00341779	0.0104415	-0.0138279	-0.00680421
Lactobacillus_casei_BL23_uid59237|murG	17.2298	0.0797067	-0.0304709	-0.0527995	0.00243432	0.0217181	0.0163763	-0.0280671	0.0109277	-0.0640477	-0.0166968	0.0353701	-0.0278535	0.0247629	0.0190701	-0.0252055	0.041246	0.0273193	0.00275482	0.00785238	-0.0443976
Lactobacillus_casei_BL23_uid59237|ileS	12.3502	0.0443999	-0.00621748	-0.0394893	0.0212995	0.00919804	0.00549631	-0.0245677	0.0024303	-0.0306476	0.00803917	-0.0036788	-0.0277442	0.0172956	0.0159408	-0.007491	0.0143108	0.00823092	-0.00456046	0.00118389	-0.00342868
Lactobacillus_casei_BL23_uid59237|hisA	18.138	0.0805119	-0.00414938	-0.0618745	0.000784546	-0.00299871	0.00850797	-0.027895	0.000104606	-0.0992712	0.0128666	0.0262561	-0.0328812	0.0674361	-0.0121343	0.000523031	0.0547788	0.0507863	0.000104606	-0.0616653	0.000209212
Lactobacillus_casei_BL23_uid59237|pyrE	17.7185	0.0846593	-0.00540541	-0.078518	0.0130948	0.0149473	0.0173582	-0.00994798	0.0234742	-0.0820708	0.00398427	0.00527852	-0.0576069	0.0495115	0.035427	-0.0071057	0.0112422	0.0149473	0.0140845	-0.043091	-0.00426342
Lactobacillus_casei_BL23_uid59237|fni	14.4857	0.0433099	-0.0169014	-0.0295447	-0.0155503	0.00842614	0.00398788	-0.0775221	0.0209794	-0.0584343	0.00917131	0.0432198	-0.0298149	0.061677	0.0152555	-0.0296348	0.0267933	0.00716508	0.00326728	0.0163364	-0.00218637
Lactobacillus_casei_BL23_uid59237|ffh	13.8617	0.0234217	0	-0.0343654	0.0197583	-0.00468619	0.00719665	-0.0259972	0.00392376	-0.0393212	0.0225012	-0.0190609	0.023152	-0.000641562	0.00432357	-0.0135844	0.0298187	-0.0113622	0	0.022371	-0.0074477
Lactobacillus_casei_BL23_uid59237|ftsY	12.5934	0.0231688	0	0.000946626	0.0260154	0.00761329	0.0343807	-0.053434	0.00764015	-0.0449211	-0.0293387	-0.00537093	0.0119839	-0.0104129	-0.00312185	-0.0231219	0.00958711	-0.00277274	0.00302115	0.0620947	-0.0139577
Lactobacillus_casei_BL23_uid59237|oppF	12.8163	0.0196506	-0.000797995	-0.0104487	0.0180172	-0.00490019	0.0149375	-0.0104862	0.0220446	-0.0436279	0.0101869	-0.0562836	-0.0340894	0.0267578	0.0101869	0.0219698	0.0480418	-0.0119325	-0.00395257	-0.0215085	0.00623434
Lactobacillus_casei_BL23_uid59237|glnA	9.95642	0.0266249	-0.0112208	-0.0359898	0.0200038	-0.00462977	-0.0247439	-0.0001254	0.00219199	-0.0135883	0.00666627	0.0378808	-0.0179974	0.0268005	0.00211675	0.00434887	-0.00454951	0.00437897	-0.00674151	-0.0292583	0.0178319
Lactobacillus_casei_BL23_uid59237|pheT	15.0598	0.0618461	-0.00528928	-0.0428605	0.0119767	0.0108573	-0.0133075	-0.0401877	0.010592	-0.0429302	-0.00547136	-0.00475878	-0.0271882	0.0335677	0.00412712	-0.00471607	0.0116553	0.0149013	0.00691226	0.0218832	-0.00160949
Lactobacillus_casei_BL23_uid59237|argS	11.898	0.0489715	-0.00883392	-0.0487696	0.020154	0.00594397	0.000416456	-0.0135096	0.0144372	-0.00980565	-0.0103735	0.0134654	-0.0277385	0.0144182	0.0181032	-0.00836068	-0.00490283	-0.0120457	0.00896643	-0.0045053	0.00396896
Lactobacillus_casei_BL23_uid59237|purM	16.2473	0.0474144	-0.00550894	-0.0353646	-0.00340258	0.00619116	-0.0136615	-0.0496913	0.0125699	-0.0793423	0.00430652	0.0357313	-0.0276555	0.0480625	0.0218311	0.0105915	0.0244747	0.00750443	0.00595238	-0.00802463	-0.00197844
Lactobacillus_casei_BL23_uid59237|oppF	12.8163	0.0196506	-0.000797995	-0.0104487	0.0180172	-0.00490019	0.0149375	-0.0104862	0.0220446	-0.0436279	0.0101869	-0.0562836	-0.0340894	0.0267578	0.0101869	0.0219698	0.0480418	-0.0119325	-0.00395257	-0.0215085	0.00623434
Lactobacillus_casei_BL23_uid59237|oppF	12.8163	0.0196506	-0.000797995	-0.0104487	0.0180172	-0.00490019	0.0149375	-0.0104862	0.0220446	-0.0436279	0.0101869	-0.0562836	-0.0340894	0.0267578	0.0101869	0.0219698	0.0480418	-0.0119325	-0.00395257	-0.0215085	0.00623434
Lactobacillus_casei_BL23_uid59237|prsA	5.53241	-0.00405533	-0.0175614	-0.0430704	0.0111405	-0.0190997	0.0160232	-0.0815378	-0.0108725	0.0537797	0.00612961	0.00319299	0.00473122	0.025777	-0.0319182	0.0445853	-0.00780767	0.0480696	0.00668896	-0.0232832	0.019088
Lactobacillus_rhamnosus_GG_uid59313|lysC	13.6691	0.0513658	-0.00850511	-0.030962	-0.00335177	-0.00703871	0.0028909	-0.0219541	0.0177225	-0.0312552	0.000502765	0.00368694	-0.00988772	0.0351098	0.0200687	-0.0290766	0.00942685	-0.011815	4.18971e-05	-0.00900788	0.0220379
Lactobacillus_rhamnosus_GG_uid59313|nrdD	13.5766	0.0160667	0.00764572	-0.0306937	0.0211847	-0.00303685	0.00367995	-0.00303685	-0.00770825	-0.00035549	-0.00954465	-0.0195359	-0.0158774	0.0125404	0.0138391	-0.018398	0.0120099	0.0195788	-0.000684185	0.00208114	0.000244735
Lactobacillus_rhamnosus_GG_uid59313|glnA	9.88202	0.0176764	-0.0112208	-0.0337527	0.0177667	-0.00462977	-0.0225068	-0.00236254	0.00442913	-0.024774	0.00442913	0.0378808	-0.011286	0.0312748	0.00659103	-0.0001254	0.0021619	0.00437897	-0.00674151	-0.0270212	0.0178319
Lactobacillus_rhamnosus_GG_uid59313|alaS	11.5967	0.048233	-0.014574	-0.0396029	0.00648723	0.0133677	0.00948652	-0.0228287	0.00475026	-0.0136362	-0.0064745	-0.000155246	-0.00281732	0.0253356	0.0117147	-0.0039664	0.00162499	-0.00151428	0.00242412	-0.00469554	-0.013159
Lactobacillus_rhamnosus_GG_uid59313|trxB	11.7132	0.00706324	-0.0113122	-0.0235211	0.0074633	0.00244178	0.0253697	-0.0514568	0.0259629	-0.0402411	-0.024004	0.0569336	-0.0164303	0.0345161	-0.00335228	0.00727017	0.0314673	0.00303499	0.00157267	-0.0369027	0.00412482
Lactobacillus_rhamnosus_GG_uid59313|rfaG	17.6286	0.0620419	-0.0112676	-0.00691612	0.0469694	-0.02133	-0.0171957	-0.0441945	0.0172658	-0.0551328	0.00929157	-0.0362203	-0.0868124	0.0214	0.0159484	-0.0266344	0.0437881	0.0439703	-0.000329339	0.0410062	0.00435148
Lactobacillus_rhamnosus_GG_uid59313|gatB	7.31206	0.0323275	-0.00482436	-0.037475	0.0131378	0.024811	0.00898107	-0.00605199	-0.0170576	-0.00717193	-0.0102087	0.0306476	-0.0352351	0.0163899	-0.0187375	0.0200943	-0.0166053	0.0275032	-0.00426439	0.0178545	-0.0341151
Lactobacillus_rhamnosus_GG_uid59313|murG	18.5118	0.0907259	-0.0304709	-0.0583091	-0.00858497	0.0272277	0.00811184	-0.0280671	0.00817289	-0.0612929	-0.0166968	0.0353701	-0.0250986	0.0275177	0.0218249	-0.016941	0.0329815	0.0218096	0.00275482	0.00785238	-0.038888
Lactobacillus_rhamnosus_GG_uid59313|ileS	10.3553	0.055716	-0.0116054	-0.0586235	-0.0175083	0.00772113	0.000370685	-0.0101578	-0.00492782	-0.0196858	0.000404064	0.0210763	-0.00177349	0.0696676	-0.0112602	0.00470207	0.00174977	0.0140201	-0.0188461	-0.0146403	-0.00639914
Lactobacillus_rhamnosus_GG_uid59313|recQ	14.0166	0.0266482	0.00981891	-0.0379578	-0.00328345	-0.000757962	0.00834387	-0.0337151	0.00560137	-0.0387913	0.00526799	0.02684	-0.00316708	0.0459023	0.0127281	-0.0317149	-0.00802622	0.00920247	0.00338409	-0.00430875	0.00798533
Lactobacillus_rhamnosus_GG_uid59313|hisA	16.9157	0.0544918	-0.00414938	-0.0752221	0.00201636	-0.00708227	0.0077655	-0.0560749	0.0238298	-0.0843207	0.0113816	0.0294622	-0.0219467	0.0516756	0.00281624	-0.00133313	0.0277125	0.0673399	-0.000266627	-0.0275625	-0.000533253
Lactobacillus_rhamnosus_GG_uid59313|pyrE	19.2059	0.0901071	-0.00540541	-0.0642784	0.00392657	0.0153238	0.0174911	-0.00963794	0.0235849	-0.0771545	-0.000688424	0.0105048	-0.0480622	0.0356706	0.0356706	-0.00688424	0.0113972	0.00117287	0.0141509	-0.0427588	-0.00413055
Lactobacillus_rhamnosus_GG_uid59313|fni	15.2586	0.0374959	-0.0169014	-0.0295447	-0.00392237	-0.00610875	0.0010809	-0.0600802	0.0297003	-0.0613413	-0.0024566	0.0432198	-0.0385359	0.0587701	0.0268834	-0.0296348	0.0297003	0.012979	0.00326728	0.00180151	0.00362758
Lactobacillus_rhamnosus_GG_uid59313|ffh	14.2097	0.0234217	0	-0.0301813	0.0155742	-0.00468619	0.00719665	-0.0259972	0.00392376	-0.0330451	0.0204091	-0.0253371	0.0168759	-0.000641562	0.00432357	-0.0135844	0.0298187	-0.00508601	0	0.024463	-0.0074477
Lactobacillus_rhamnosus_GG_uid59313|ftsY	12.7942	0.0201477	0	0.0100101	0.0139308	0.0136556	0.0313595	-0.053434	0.004619	-0.0539846	-0.0293387	-0.00537093	0.0119839	-0.00739174	-0.000100705	-0.0321853	0.0156294	0.0062907	0.00302115	0.0620947	-0.0109366
Lactobacillus_rhamnosus_GG_uid59313|oppF	10.7199	0.0196506	-0.000797995	-0.00729417	0.0148627	-0.00805476	0.0117829	-0.00733158	0.0220446	-0.0341642	0.00387776	-0.053129	-0.0372439	0.0236032	0.0101869	0.0188152	0.0448872	-0.00562337	-0.00395257	-0.0215085	0.00938891
Lactobacillus_rhamnosus_GG_uid59313|glnA	9.88202	0.0176764	-0.0112208	-0.0337527	0.0177667	-0.00462977	-0.0225068	-0.00236254	0.00442913	-0.024774	0.00442913	0.0378808	-0.011286	0.0312748	0.00659103	-0.0001254	0.0021619	0.00437897	-0.00674151	-0.0270212	0.0178319
Lactobacillus_rhamnosus_GG_uid59313|argS	12.0763	0.0418286	-0.00883392	-0.0416267	0.0165825	0.00237254	0.00398788	-0.017081	0.0162229	-0.00623423	-0.013945	0.0152511	-0.0330957	0.0179897	0.0181032	-0.00657496	-0.00668854	-0.01026	0.00896643	0.00263756	0.000397527
Lactobacillus_rhamnosus_GG_uid59313|purM	18.2255	0.0622953	-0.00253275	-0.041317	-0.00637877	0.00321497	-0.0136615	-0.0467151	0.00959374	-0.07339	-0.00164586	0.0327552	-0.0276555	0.0391339	0.0277835	0.0046391	0.0214985	0.0194092	0.00595238	-0.013977	0.000997749
Lactobacillus_rhamnosus_GG_uid59313|oppF	10.7199	0.0196506	-0.000797995	-0.00729417	0.0148627	-0.00805476	0.0117829	-0.00733158	0.0220446	-0.0341642	0.00387776	-0.053129	-0.0372439	0.0236032	0.0101869	0.0188152	0.0448872	-0.00562337	-0.00395257	-0.0215085	0.00938891
Lactobacillus_rhamnosus_GG_uid59313|oppF	10.7199	0.0196506	-0.000797995	-0.00729417	0.0148627	-0.00805476	0.0117829	-0.00733158	0.0220446	-0.0341642	0.00387776	-0.053129	-0.0372439	0.0236032	0.0101869	0.0188152	0.0448872	-0.00562337	-0.00395257	-0.0215085	0.00938891
Lactobacillus_rhamnosus_GG_uid59313|lysC	13.6691	0.0513658	-0.00850511	-0.030962	-0.00335177	-0.00703871	0.0028909	-0.0219541	0.0177225	-0.0312552	0.000502765	0.00368694	-0.00988772	0.0351098	0.0200687	-0.0290766	0.00942685	-0.011815	4.18971e-05	-0.00900788	0.0220379
Lactobacillus_rhamnosus_GG_uid59313|prsA	5.50288	-0.0443786	-0.0175726	-0.0331707	0.0075842	-0.0125668	0.00924506	-0.0583159	-0.0109059	0.0833449	0.00939605	-0.0204413	-0.00544715	0.0322764	-0.0286295	0.0509175	-0.0178746	0.0477352	0.01	-0.016806	0.0156098
Lactobacillus_rhamnosus_Lc_705_uid59315|lysC	13.0894	0.0491872	-0.00850511	-0.030962	0.00100553	-0.00703871	0.0028909	-0.0219541	0.0155438	-0.0312552	0.00268141	0.00368694	-0.00988772	0.0351098	0.0200687	-0.0290766	0.00942685	-0.011815	4.18971e-05	-0.0111865	0.0220379
Lactobacillus_rhamnosus_Lc_705_uid59315|nrdD	13.6224	0.0146912	0.00764572	-0.0293181	0.0198092	-0.00303685	0.00367995	-0.00303685	-0.00908376	-0.00035549	-0.00954465	-0.0195359	-0.0158774	0.0125404	0.0138391	-0.0170225	0.0120099	0.0209543	-0.000684185	0.00208114	0.000244735
Lactobacillus_rhamnosus_Lc_705_uid59315|glnA	9.6588	0.0199135	-0.0112208	-0.0337527	0.0222409	-0.00462977	-0.0225068	-0.00236254	0.00442913	-0.024774	0.00442913	0.0378808	-0.0157603	0.0290376	0.00659103	-0.0001254	0.00439903	0.00437897	-0.00674151	-0.0292583	0.0178319
Lactobacillus_rhamnosus_Lc_705_uid59315|alaS	11.3953	0.0255795	-0.014574	-0.038925	0.00962547	0.00965389	0.018193	-0.022971	0.00712752	-0.0178551	-0.00296217	0.000397903	-0.00342323	0.0173309	0.0159224	0.000514748	0.00724121	0.00143371	0.00316112	-0.0052359	-0.010235
Lactobacillus_rhamnosus_Lc_705_uid59315|trxB	11.6119	0.00706324	-0.0113122	-0.0235211	0.0074633	0.00244178	0.0253697	-0.0545056	0.0259629	-0.0402411	-0.024004	0.0569336	-0.0164303	0.0345161	-0.00335228	0.00727017	0.0314673	0.00303499	0.00157267	-0.0338539	0.00412482
Lactobacillus_rhamnosus_Lc_705_uid59315|rfaG	17.6286	0.0595543	-0.0112676	-0.00691612	0.0469694	-0.02133	-0.0171957	-0.0441945	0.0172658	-0.0551328	0.00929157	-0.0362203	-0.0868124	0.0214	0.0159484	-0.0266344	0.0437881	0.0439703	-0.000329339	0.0434938	0.00435148
Lactobacillus_rhamnosus_Lc_705_uid59315|gatB	12.0353	0.0267465	-0.0149254	-0.0203499	0.0117584	0.00743133	0.0080898	-0.0137339	0.0102534	-0.0224508	-0.0153016	-0.00313558	-0.017622	0.0268092	0.00558134	0.00150508	-0.00909319	0.0181237	0.0125423	-0.00962624	-0.00260253
Lactobacillus_rhamnosus_Lc_705_uid59315|murG	18.2371	0.0907259	-0.0304709	-0.0583091	-0.00858497	0.0272277	0.00811184	-0.0253123	0.00817289	-0.0612929	-0.0166968	0.0353701	-0.0250986	0.0302725	0.0218249	-0.016941	0.0302267	0.0218096	0.00275482	0.00509756	-0.038888
Lactobacillus_rhamnosus_Lc_705_uid59315|ileS	10.5368	0.0548077	-0.0116054	-0.0577152	-0.0184165	0.00681287	0.000370685	-0.0101578	-0.00674435	-0.0196858	0.000404064	0.0210763	4.30416e-05	0.0687594	-0.0112602	0.00470207	0.00447457	0.0158367	-0.0188461	-0.0164568	-0.00639914
Lactobacillus_rhamnosus_Lc_705_uid59315|recQ	14.1292	0.0266482	0.00981891	-0.0379578	-0.00328345	-0.000757962	0.00834387	-0.0354072	0.00560137	-0.0404833	0.00526799	0.02684	-0.00316708	0.0475943	0.0127281	-0.0317149	-0.00802622	0.0108945	0.00338409	-0.00430875	0.00798533
Lactobacillus_rhamnosus_Lc_705_uid59315|hisA	16.3824	0.0544918	-0.00414938	-0.0752221	0.00201636	-0.00708227	0.0077655	-0.0520589	0.0238298	-0.0843207	0.00736556	0.0294622	-0.0259628	0.0516756	0.00281624	-0.00133313	0.0277125	0.0673399	-0.000266627	-0.0235465	-0.000533253
Lactobacillus_rhamnosus_Lc_705_uid59315|pyrE	19.0494	0.0901071	-0.00540541	-0.0689954	0.00392657	0.0153238	0.0174911	-0.00963794	0.0235849	-0.0771545	-0.000688424	0.0105048	-0.0480622	0.0356706	0.0309536	-0.00216726	0.0113972	0.00117287	0.0141509	-0.0380418	-0.00413055
Lactobacillus_rhamnosus_Lc_705_uid59315|fni	15.2586	0.0374959	-0.0169014	-0.0295447	-0.00392237	-0.00610875	0.0010809	-0.0600802	0.0326073	-0.0613413	-0.0024566	0.0432198	-0.0385359	0.061677	0.0268834	-0.0296348	0.0267933	0.012979	0.00326728	0.00180151	0.000720603
Lactobacillus_rhamnosus_Lc_705_uid59315|ffh	14.1401	0.0234217	0	-0.0301813	0.0155742	-0.00468619	0.00719665	-0.0259972	0.00392376	-0.0330451	0.0204091	-0.023245	0.0168759	-0.000641562	0.00432357	-0.0156764	0.0298187	-0.00508601	0	0.024463	-0.0074477
Lactobacillus_rhamnosus_Lc_705_uid59315|ftsY	13.497	0.0201477	0	0.00698892	0.016952	0.0136556	0.0313595	-0.0504129	0.004619	-0.0539846	-0.0293387	-0.00537093	0.0119839	-0.00739174	-0.000100705	-0.0321853	0.0156294	0.0062907	0.00302115	0.0590735	-0.0109366
Lactobacillus_rhamnosus_Lc_705_uid59315|oppF	11.244	0.0196506	-0.000797995	-0.00729417	0.0148627	-0.00805476	0.0117829	-0.00733158	0.0220446	-0.0341642	0.00387776	-0.053129	-0.0372439	0.0236032	0.0101869	0.0219698	0.0448872	-0.00877795	-0.00395257	-0.0215085	0.00938891
Lactobacillus_rhamnosus_Lc_705_uid59315|glnA	9.6588	0.0199135	-0.0112208	-0.0337527	0.0222409	-0.00462977	-0.0225068	-0.00236254	0.00442913	-0.024774	0.00442913	0.0378808	-0.0157603	0.0290376	0.00659103	-0.0001254	0.00439903	0.00437897	-0.00674151	-0.0292583	0.0178319
Lactobacillus_rhamnosus_Lc_705_uid59315|argS	11.9574	0.0400429	-0.00883392	-0.0416267	0.0165825	0.00415825	0.00398788	-0.017081	0.0162229	-0.00623423	-0.013945	0.0152511	-0.0330957	0.0179897	0.0181032	-0.00478925	-0.00847426	-0.01026	0.00896643	0.00263756	0.000397527
Lactobacillus_rhamnosus_Lc_705_uid59315|oppF	11.244	0.0196506	-0.000797995	-0.00729417	0.0148627	-0.00805476	0.0117829	-0.00733158	0.0220446	-0.0341642	0.00387776	-0.053129	-0.0372439	0.0236032	0.0101869	0.0219698	0.0448872	-0.00877795	-0.00395257	-0.0215085	0.00938891
Lactobacillus_rhamnosus_Lc_705_uid59315|oppF	11.244	0.0196506	-0.000797995	-0.00729417	0.0148627	-0.00805476	0.0117829	-0.00733158	0.0220446	-0.0341642	0.00387776	-0.053129	-0.0372439	0.0236032	0.0101869	0.0219698	0.0448872	-0.00877795	-0.00395257	-0.0215085	0.00938891
Lactobacillus_rhamnosus_Lc_705_uid59315|lysC	13.0894	0.0491872	-0.00850511	-0.030962	0.00100553	-0.00703871	0.0028909	-0.0219541	0.0155438	-0.0312552	0.00268141	0.00368694	-0.00988772	0.0351098	0.0200687	-0.0290766	0.00942685	-0.011815	4.18971e-05	-0.0111865	0.0220379
Lactobacillus_rhamnosus_Lc_705_uid59315|prsA	4.94917	-0.0443786	-0.0175726	-0.0331707	0.0075842	-0.0125668	0.00924506	-0.0583159	-0.0109059	0.0833449	0.00939605	-0.0204413	-0.00544715	0.0322764	-0.0286295	0.0509175	-0.0178746	0.0477352	0.01	-0.016806	0.0156098
Lactobacillus_salivarius_UCC118_uid58233|prsA	0.222251	0.00357009	-0.0147521	-0.0147092	0.0211739	-0.000771911	0.0133476	-0.0134441	0.000632538	-0.0028089	0.0106781	-0.0101849	-0.0149343	-0.00285178	0.0100884	-0.00344144	0.0275101	-0.0184187	0	0.0152452	-0.00592871
Lactobacillus_salivarius_UCC118_uid58233|rfaG	2.39346	0.00417102	0.000601831	0.000192251	0.0291136	-0.0256112	-0.0322982	-0.0331592	-0.00473106	-0.00896895	0.0151377	0.000384503	-0.0478455	0.0182555	-0.0100639	-0.0373302	0.0449618	0.00447194	0.00905253	0.0295649	0.0441008
Lactobacillus_salivarius_UCC118_uid58233|rfaG	2.39346	0.00417102	0.000601831	0.000192251	0.0291136	-0.0256112	-0.0322982	-0.0331592	-0.00473106	-0.00896895	0.0151377	0.000384503	-0.0478455	0.0182555	-0.0100639	-0.0373302	0.0449618	0.00447194	0.00905253	0.0295649	0.0441008
Lactobacillus_salivarius_UCC118_uid58233|glnA	-4.92453	-0.0270663	-0.00898366	-0.0136184	0.0222409	-0.00910404	-0.00908398	-0.0113111	0.0089034	-0.0180626	0.0156148	0.0311694	0.0133225	0.00442913	-0.00235752	-0.0157854	0.0267704	-0.00456958	-3.0096e-05	-0.0135984	0.0111205
Lactobacillus_salivarius_UCC118_uid58233|ftsY	-1.27529	-0.000614657	0	0.043357	0.036643	-0.0185343	0.0178251	-0.0417494	0.00737589	-0.0362648	-0.0255319	-0.0283688	0.0210402	-0.0206619	-0.0167849	0.0175887	0.0111584	-0.00382979	0.00236407	0.0431678	-0.00817967
Lactobacillus_salivarius_UCC118_uid58233|ffh	1.3166	0.0143937	0	-0.0140526	0.0087598	-0.00738589	0.00697095	-0.0140526	-0.00236976	-0.0235224	0.0136468	-0.0198248	0.0143845	0.00727524	0.00401107	-0.0180636	0.0272752	-0.0137667	0	0.0259474	-0.00962656
Lactobacillus_salivarius_UCC118_uid58233|purM	-0.763006	-0.00786512	0.000132885	-0.0134961	0.0152568	0.0183547	0.000365433	-0.0104315	-0.00269922	-0.0219924	-0.0111955	0.0211868	-0.00806445	0.0117271	0.000298991	0.0149911	0.0117935	0.0062622	0.00289855	-0.0307213	0.00319754
Lactobacillus_salivarius_UCC118_uid58233|argS	-2.29777	0.0110338	-0.00883392	-0.0189262	0.025121	0.00206805	0.000207119	-0.0227046	0.00540391	0.00578049	-0.0158163	0.0235707	-0.0297811	0.0178279	0.00900338	0.00205863	-0.00687885	-0.00865505	0.00889982	-0.00490495	0.0055263
Lactobacillus_salivarius_UCC118_uid58233|pheT	1.00336	0.0342602	-0.00529856	-0.0206673	0.0204991	0.00322443	-0.0196022	-0.0266655	-0.00314371	-0.0281409	0.000699599	-0.0186492	-0.00739287	0.00984147	-0.00842209	0.00264143	0.0177613	0.00355405	0.00440613	0.0303406	0.0107541
Lactobacillus_salivarius_UCC118_uid58233|pyrE	0.573996	0.0268171	0.00430333	-0.00991866	0.0150092	0.00795067	0.0037523	0.011703	0.0145631	-0.0320913	0.00430333	-0.0104697	-0.0422461	0.00805563	0.0274731	-0.00551036	0.012359	-0.0163212	0.0194175	-0.0504067	0.0112569
Lactobacillus_salivarius_UCC118_uid58233|rfaG	2.39346	0.00417102	0.000601831	0.000192251	0.0291136	-0.0256112	-0.0322982	-0.0331592	-0.00473106	-0.00896895	0.0151377	0.000384503	-0.0478455	0.0182555	-0.0100639	-0.0373302	0.0449618	0.00447194	0.00905253	0.0295649	0.0441008
Lactobacillus_salivarius_UCC118_uid58233|rfaG	2.39346	0.00417102	0.000601831	0.000192251	0.0291136	-0.0256112	-0.0322982	-0.0331592	-0.00473106	-0.00896895	0.0151377	0.000384503	-0.0478455	0.0182555	-0.0100639	-0.0373302	0.0449618	0.00447194	0.00905253	0.0295649	0.0441008
Lactobacillus_salivarius_UCC118_uid58233|rfaG	2.39346	0.00417102	0.000601831	0.000192251	0.0291136	-0.0256112	-0.0322982	-0.0331592	-0.00473106	-0.00896895	0.0151377	0.000384503	-0.0478455	0.0182555	-0.0100639	-0.0373302	0.0449618	0.00447194	0.00905253	0.0295649	0.0441008
Lactobacillus_salivarius_UCC118_uid58233|ileS	1.75537	0.0312397	-0.00408662	-0.0106757	0.00920995	0.0100742	0.00750218	-0.0311825	-0.000868432	-0.0276475	0.00579024	0.00576947	-0.0181779	0.0128811	0.00610707	-0.0055025	0.0130909	-0.00270814	-0.00570402	0.00737856	-0.00248999
Lactobacillus_salivarius_UCC118_uid58233|lysC	1.16336	0.0263497	-0.0081712	-0.0172551	0.00650689	-0.0126058	0.00136366	-0.0422626	0.0151935	-0.0173732	0.00702229	-0.00908388	0.00650689	0.0123051	-0.000891208	-0.0123481	-0.00114891	0.0162994	0.00288837	0.0244492	0.00225486
Lactobacillus_salivarius_UCC118_uid58233|alaS	0.110753	0.0347024	-0.0134376	-0.00430595	0.00656849	0.00891765	0.00726152	-0.0216266	0.00818386	-0.00900428	-0.00417856	-0.00120261	-0.00276702	0.0128975	0.00494293	0.00289951	-0.00514676	-0.0116745	-0.000968202	-0.00347534	-0.00858642
Lactobacillus_salivarius_UCC118_uid58233|nrdD	-1.80546	0.00524854	0.00770264	-0.0139901	0.00760412	0.00265114	0.00931482	-0.0139006	-0.00901926	0.0122974	0.000152262	-0.00693238	-0.00748768	0.00988804	0.0180833	-0.0127631	-0.00025974	0.00322436	0.000725481	-0.00464845	-0.00789073
Lactobacillus_salivarius_UCC118_uid58233|gatB	-0.410398	0.0328993	-0.0128289	-0.00164496	0.00951666	0.000987873	0.00383527	-0.00548024	-0.00238252	-0.0268022	-0.00277588	-0.00327652	-0.0030262	0.00571715	0.00337039	0.0118992	-0.000786722	0.00539531	0.00831422	-0.0244554	0.00152427
Lactobacillus_salivarius_UCC118_uid58233|rfaG	2.39346	0.00417102	0.000601831	0.000192251	0.0291136	-0.0256112	-0.0322982	-0.0331592	-0.00473106	-0.00896895	0.0151377	0.000384503	-0.0478455	0.0182555	-0.0100639	-0.0373302	0.0449618	0.00447194	0.00905253	0.0295649	0.0441008
Lactobacillus_salivarius_UCC118_uid58233|rfaG	2.39346	0.00417102	0.000601831	0.000192251	0.0291136	-0.0256112	-0.0322982	-0.0331592	-0.00473106	-0.00896895	0.0151377	0.000384503	-0.0478455	0.0182555	-0.0100639	-0.0373302	0.0449618	0.00447194	0.00905253	0.0295649	0.0441008
Lactobacillus_salivarius_UCC118_uid58233|prsA	0.222251	0.00357009	-0.0147521	-0.0147092	0.0211739	-0.000771911	0.0133476	-0.0134441	0.000632538	-0.0028089	0.0106781	-0.0101849	-0.0149343	-0.00285178	0.0100884	-0.00344144	0.0275101	-0.0184187	0	0.0152452	-0.00592871
Mannheimia_succiniciproducens_MBEL55E_uid58197|ftsY	11.6191	0.0381197	0	0.0180342	0.00641026	-0.0116239	0.0163248	-0.0225641	0.0105128	-0.045812	-0.0273504	-0.0277778	0.000854701	0.0345299	-0.00982906	-0.00846154	0.00111111	0.0108547	0.00641026	0.0195726	-0.00931624
Mannheimia_succiniciproducens_MBEL55E_uid58197|pyrE	11.9038	0.0372064	0.00394039	-0.0318767	0.0128315	0.0192473	0.0499369	-0.000909321	0.0046729	-0.0729225	0.0132862	-0.00924476	-0.0203334	0.021167	0.0164941	-0.00732508	0.039126	-0.0368275	0	-0.0527658	0.0142965
Mannheimia_succiniciproducens_MBEL55E_uid58197|glnA	2.98426	0.00871371	-0.00306349	-0.00954921	0.00486193	-0.0126646	-0.00790654	0.00920935	0.000873259	-0.0108331	0.0135048	0.0106302	0.0141043	0.000873259	0.000925183	-0.00131697	0.00215719	-0.000495634	-0.00924239	-0.019528	0.00874675
Mannheimia_succiniciproducens_MBEL55E_uid58197|alaS	8.45942	0.0454427	-0.00657399	-0.0346111	0.00240615	0.0173722	0.00520307	-0.0201461	0.00832671	-0.0291147	-0.00519154	0.00609609	-0.00365663	0.0199949	-0.00629084	0.0100359	0.00761947	-0.00453812	-0.00318898	0.00152466	-0.0107098
Mannheimia_succiniciproducens_MBEL55E_uid58197|oppF	7.82121	0.020332	0.0200474	-0.023004	-0.0193834	-0.0271462	0.0242372	-0.0108142	0.00418972	-0.0467194	-0.015668	0.0174704	-0.0230988	0.0602846	-0.00766798	0.0525692	0.00833202	-0.00747826	4.74308e-05	-0.0269091	0.000379447
Mannheimia_succiniciproducens_MBEL55E_uid58197|ffh	10.3897	0.0219486	0	-0.0175522	0.0113991	0.00855292	0.0167171	-0.0369906	0.00851452	-0.0318838	0.0181905	-0.0074394	0.0012239	-0.0099496	-0.000935925	-0.00797696	0.027329	-0.00791457	0	0.0224478	-0.0156803
Mannheimia_succiniciproducens_MBEL55E_uid58197|purM	14.4586	0.0240189	0.00592999	-0.0221918	-0.00793156	0.0299489	-0.0112288	-0.0336199	0.00599643	-0.0480794	-0.0198912	0.0153897	-0.0167601	0.0233213	0.0176903	-0.00819733	0.0146921	0.00336365	0.0144928	0.0127569	0.000298991
Mannheimia_succiniciproducens_MBEL55E_uid58197|nrdD	7.29499	0.0093923	0.00811003	-0.0111714	-0.000991835	0.00257548	0.00323305	0.00960783	-0.00433814	-0.015283	-0.00639122	-0.0151753	-0.00510348	0.0204395	0.0147058	-0.010406	0.0117796	-0.00694102	-0.00606243	0.000630172	0.00139003
Mannheimia_succiniciproducens_MBEL55E_uid58197|modF	6.80025	0.000569915	-0.000927509	-0.0429224	0.00533038	-0.011957	0.0269983	-0.0142591	0.00587795	-0.0342955	-0.00527451	-0.00573268	0.00763239	0.0549577	0.00811291	0.0262608	-0.00326304	-0.0128175	0.0127169	-0.0162705	-0.000737537
Mannheimia_succiniciproducens_MBEL55E_uid58197|oppF	7.82121	0.020332	0.0200474	-0.023004	-0.0193834	-0.0271462	0.0242372	-0.0108142	0.00418972	-0.0467194	-0.015668	0.0174704	-0.0230988	0.0602846	-0.00766798	0.0525692	0.00833202	-0.00747826	4.74308e-05	-0.0269091	0.000379447
Mannheimia_succiniciproducens_MBEL55E_uid58197|pheT	10.5599	0.0553391	0.00732693	-0.0208001	-0.00493154	0.00655269	-0.0104534	-0.0320641	0.00584883	-0.042454	-0.00530845	0.00747678	-0.0167995	0.0214904	-0.00290625	0.0107668	0.0183707	-0.012095	0.00699998	0.015301	-0.0076607
Mannheimia_succiniciproducens_MBEL55E_uid58197|hemA	10.8186	0.0100349	0.000424508	-0.015412	-0.0207655	-0.00323098	-0.01711	-0.0296566	0.0135725	-0.0513891	0.00346682	0.0295741	-0.02527	0.0695132	0.00681572	0.0242206	0.0170393	-0.00584878	0.00152115	-0.000860808	-0.00663884
Mannheimia_succiniciproducens_MBEL55E_uid58197|argS	10.0286	0.0317592	-0.00362559	-0.0453965	0.0165329	0.00599357	-0.00241092	-0.0203548	0.0101713	-0.00841676	0.00118399	0.00364399	-0.0256552	0.0345075	0.00654569	-0.0113369	-0.00247227	0.0148888	0.0068831	-0.0135331	0.00109197
Mannheimia_succiniciproducens_MBEL55E_uid58197|hypB	9.04303	-0.0116137	0.00797312	0.00392066	-0.047328	-0.00423366	-0.00619399	-0.0644109	-0.00774249	-0.0496508	0.00719887	0.0311182	0.00237217	0.0493378	0.0227333	0.0485635	0.0198175	-0.00113666	0.00738007	-0.0139365	0.00583158
Mannheimia_succiniciproducens_MBEL55E_uid58197|rfaG	11.8244	0.0487116	0.00399957	-0.000630757	0.0134538	-0.0251658	-0.0238039	-0.0352507	0.00545461	-0.0233452	0.017267	-0.00635057	-0.0584238	0.0169946	0.00182059	-0.0127155	0.0348063	0.0252661	-0.000272372	0.0126366	0.00554779
Mannheimia_succiniciproducens_MBEL55E_uid58197|prsA	9.99788	0.0160433	-0.0114123	-0.0288669	0.0296939	-0.00227142	0.0173885	-0.026375	-0.0114123	-0.0355158	0.0113792	-0.0111586	-0.00764125	0.000926212	-0.00732148	0.0107066	0.0449102	-0.00479645	0	0.0274556	-0.011732
Mannheimia_succiniciproducens_MBEL55E_uid58197|hypF	14.1359	0.0546061	0.00392305	-0.032353	-0.0129146	-0.00641434	0.00783937	-0.0453114	0.0182037	-0.0388414	-0.00387421	0.0183065	-0.01548	0.0441777	0.0169269	-0.0206899	0.0208213	0.0013526	0.0129887	5.89553e-05	-0.0233261
Mannheimia_succiniciproducens_MBEL55E_uid58197|dcd	11.2622	0.0430387	-0.0191172	0.00390351	0.0142128	0.00390351	-0.0176159	0.0248223	0.00120108	-0.0764688	0.00605545	0.0302772	-0.00670604	-0.013362	0.0275748	-0.015514	0.0788209	-0.0273246	0.00545491	-0.0358322	-0.0273246
Mannheimia_succiniciproducens_MBEL55E_uid58197|lysC	9.55407	0.0603419	-0.00179487	-0.0298291	-0.00017094	-0.0254701	-0.0118803	-0.0403419	0.00282051	-0.0326496	-0.00786325	0.0364103	0.0042735	0.0160684	0.00538462	0.000683761	0.00811966	0.0203419	0.00452991	-0.0117094	0.00273504
Mannheimia_succiniciproducens_MBEL55E_uid58197|pheA	5.18909	-0.0168007	-0.00943469	0.00713402	-0.0133787	-0.0133787	-0.0237414	-0.00810069	0.0173034	-0.0250947	0.00549068	0.0359408	-0.0455108	0.0642448	-0.00249401	0.0257907	0.0205127	0.0196814	-0.00487201	-0.0250947	-0.00819736
Mannheimia_succiniciproducens_MBEL55E_uid58197|murG	16.3439	0.107604	-0.0163864	-0.0323983	-0.0187351	0.0263353	0.00328508	-0.0265772	-0.00253599	-0.0626819	-0.0051188	0.0182591	-0.0244157	0.0564317	0.00628926	-0.0494401	0.0368538	-0.00774843	0.0112676	0.0209824	-0.0412703
Mannheimia_succiniciproducens_MBEL55E_uid58197|ileS	11.8496	0.0445699	0.00225386	-0.0251842	0.00333439	0.0202703	0.0039592	-0.0219323	0.00324366	-0.0303168	-0.00508716	0.012655	-0.0163503	0.016905	-0.000602129	-0.000556763	0.0234232	-0.00841537	-0.000525832	-0.0103042	-0.0113394
Mannheimia_succiniciproducens_MBEL55E_uid58197|hisA	12.3824	0.0585079	0.0119149	-0.0310453	-0.0019997	0.00898199	0.0157976	-0.0319785	0.0077655	-0.0521922	-0.0127148	0.00536586	-0.0219467	0.0356113	-0.0212801	0.0147311	0.0156643	0.011115	0.00374944	-0.0235465	0.00749888
Methanobrevibacter_ruminantium_M1_uid45857|ileS	4.21568	0.0163412	0.00676729	0.00818285	0.0131606	0.00551841	-0.0028142	-0.00387863	-0.00027922	-0.0243726	0.000411216	0.0124228	-0.00912543	0.00165502	0.0044616	-0.0106908	0.00229807	-0.00419761	0.00188431	-0.00816085	-0.00958403
Methanobrevibacter_ruminantium_M1_uid45857|nrdD	4.27584	0.0120213	0.00367965	-0.00494505	0.0031302	0.00301365	0.0020646	-0.012371	-0.00939061	-0.0280386	0.00994006	0.003996	0.0043956	0.00992341	0.00609391	-0.00334665	0.000765901	0.00318015	-0.0014319	-0.0020313	-0.000649351
Methanobrevibacter_ruminantium_M1_uid45857|alaS	4.26671	0.0254866	0.000810624	-0.00419356	0.00750505	0.00299857	0.00375253	0.013788	-0.000332627	-0.0204553	-0.00602671	0.00174444	-0.000931356	0.00272015	0.00491795	-0.00640369	0.00581728	-0.00779086	-0.00134283	-0.0147391	-0.00732519
Methanobrevibacter_ruminantium_M1_uid45857|glyS	2.05376	-0.00312978	-0.00339874	0.0060456	0.00221896	0.000464576	-0.00137539	0.00582554	0.00363103	-0.00814842	-0.0103307	0.00927318	-0.00321536	0.0106608	0.00549545	0.000305642	-0.00839293	0.00732319	0.00180329	-0.0118161	-0.00323981
Methanobrevibacter_ruminantium_M1_uid45857|dcd	4.9139	0.0170276	-0.0191436	0.0292009	0.00868808	-0.00156833	-0.00238984	0.0140901	-0.00403286	-0.0355489	0.0264625	-0.00614887	-0.0326114	-0.00833956	0.0477969	-0.0158576	0.0423948	-0.0120986	-0.00485437	-0.0258402	-0.0172268
Methanobrevibacter_ruminantium_M1_uid45857|fni	3.83868	0.021167	-0.00832998	0.00965795	0.0179879	-0.00169014	-0.00808853	-0.0296982	-0.0054326	-0.0302616	0.000201207	0.0182696	-0.0247485	0.00028169	0.00889336	-0.0160966	0.0345674	0.00346076	0.000160966	0.00937626	0.000321932
Methanobrevibacter_ruminantium_M1_uid45857|gltX	6.70053	0.0088891	0.00717804	0.00701925	-0.00372675	0.0124862	-0.00546374	0.0142653	-4.53691e-05	-0.00916456	0.0089442	-0.0181476	-0.00727526	0.00356472	0.0143172	0.00173051	-0.00190226	-0.0162551	0.00357768	-0.0127228	-0.00726878
Methanobrevibacter_ruminantium_M1_uid45857|proS	6.04369	0.014214	0.00843553	0.0173356	-0.0031401	0.00327016	-0.0072278	0.00927165	0.00386473	-0.0057971	-0.000371609	-0.0187663	-0.00483092	0.00828688	0.00353029	-0.00280565	-0.000743218	-0.00317726	0.00622445	-0.00962467	-0.0179487
Methanobrevibacter_ruminantium_M1_uid45857|npdG1	3.35213	0.0072302	-0.000395093	0.0118725	0.0211572	0.0072302	-0.00480038	0.00659805	-0.000158037	-0.0149543	-0.00464234	-0.010707	-0.00055313	-0.0180953	0.00825744	-0.0321013	0.0128998	0.016989	0	-0.00999585	0.00416823
Methanobrevibacter_ruminantium_M1_uid45857|hmgA	1.93119	0.00460784	-0.00715686	-0.00828431	0.0206373	-0.000735294	0.00308824	-0.0105392	0.0077451	-0.0108824	0.0103922	-0.000833333	-0.00151961	-0.0120098	0.00544118	0.0110294	-0.00681373	-0.00372549	4.90196e-05	0.00651961	-0.0070098
Methanobrevibacter_ruminantium_M1_uid45857|pheS	2.58978	0.0221942	-0.00417476	-0.0133204	0.0160194	0.0100777	-0.0112816	-0.00809709	0.00535922	-0.0266214	-0.00452427	0.0224466	-0.015165	0.0111845	-0.00504854	0.00448544	0.000718447	0.00266019	0.00347573	-0.0192816	0.0088932
Methanobrevibacter_ruminantium_M1_uid45857|pheT	3.80272	0.00567069	-0.00539551	-0.00121538	0.0112038	-0.00692538	0.000255525	-0.00309906	0.00191316	-0.00858302	0.0110072	-0.0194428	-0.010565	0.0055331	-0.00155936	0.0183847	-0.00890734	0.00572965	0.00182471	0.00221783	0.00195247
Methanobrevibacter_ruminantium_M1_uid45857|mch	1.68379	0.0348273	-0.012326	0.00348177	0.0190967	0.0129819	0.0189038	0.000366502	-0.00926864	0.000501529	-0.0215754	-0.00565184	-0.00911432	0.00319242	0.00334674	-0.0213439	-0.012326	0.000250764	1.92896e-05	-0.00247871	-0.00288379
Methanobrevibacter_ruminantium_M1_uid45857|hypB	6.41353	0.00418196	0.0019057	0.020504	0.0040408	0.00418196	-0.0119989	-0.03702	0.0739342	-0.0528303	-0.00651115	0.00315853	-0.0279503	-0.00944029	0.0019057	0.0374788	-0.00153515	-0.0293443	0	0.0303148	-0.004976
Methanobrevibacter_ruminantium_M1_uid45857|hisA	5.11705	-0.00922646	-8.43369e-05	-0.00592045	0.0149951	-0.00193975	0.00796141	-0.0146409	-0.00423371	-0.0350504	-0.000421685	0.0105084	-0.0174409	0.0240529	-0.00888911	0.031677	0.00381203	-0.000590359	-0.000168674	-0.00219276	0.00779273
Methanobrevibacter_ruminantium_M1_uid45857|tpiA	3.26181	0.0338305	0.000516102	-0.0108123	0.0175733	-0.000567713	0.0178571	-0.00634806	-0.00394818	-0.0055481	0.000516102	-0.00583196	-0.0234052	0.0165411	-0.00738026	0.00521263	-0.0199732	0.00601259	0	-0.0173927	0.00314822
Methanobrevibacter_ruminantium_M1_uid45857|cysG	10.6023	0.0279761	-0.00526354	0.00194679	0.00310044	0.0133391	-0.0554474	0.0212705	-0.00511933	-0.0232172	0.00468671	0.041171	-0.0067056	0.0286971	0.0043983	-0.0266061	-0.00612878	0.0184584	0.00483092	-0.0358353	-0.00555195
Methanobrevibacter_ruminantium_M1_uid45857|hemA	3.64466	-0.0129969	-0.00303875	0.0112868	0.0123392	0.00847168	-0.0092215	0.018614	0.00188113	-0.00442001	-0.000947144	0.0169434	-0.00273619	-0.000736668	-0.00565656	0.00543292	-0.00409114	-0.0092215	-0.0052356	-0.00786656	-0.00880055
Methanobrevibacter_ruminantium_M1_uid45857|mcrC	4.52261	0.010101	0.010101	-0.00505051	0.010101	0	0.00505051	-0.030303	0	-0.0151515	0.00505051	0.010101	0.010101	-0.010101	-0.0151515	-0.0151515	0.0151515	0.0151515	0	0.00505051	-0.00505051
Methanobrevibacter_ruminantium_M1_uid45857|mcrB	-0.375375	0.00225734	-0.00225734	0.0158014	0.013544	-0.00902935	-0.00451467	0.00451467	-0.00677201	0.00225734	-0.0112867	0.0248307	-0.00902935	0.00451467	-0.00451467	-0.00677201	0.00677201	0.00902935	0	-0.027088	-0.00225734
Methanobrevibacter_ruminantium_M1_uid45857|purM	3.84314	0.00506293	-0.00851147	-0.00336402	0.0107936	0.02605	0.000929753	0.00885801	-0.00834242	-0.0323554	-0.00488543	0.0111317	-0.0249427	0.0062378	0.00666041	0.00716755	-0.00244271	0.0188824	0	-0.0206405	0.00371056
Methanobrevibacter_ruminantium_M1_uid45857|pheA	2.52366	0.00929444	-0.011479	0.00891452	0.0132157	0.00594301	-0.00860244	-0.00218453	0.0215332	-0.0420896	0.0034464	0.02327	-0.016825	0.00316147	-0.000854817	0.0239349	0.00297151	0.00995929	-0.00746269	-0.0275441	-0.00860244
Methanobrevibacter_ruminantium_M1_uid45857|gatB	2.72799	0.025922	0.00281299	-0.000520048	0.0133841	-0.0106657	0.00750287	-0.0124575	-0.0037538	-0.0204757	0.00605147	0.0116774	0.00442986	0.00357887	0.00639186	-0.00503501	0.00408947	-0.0133936	-0.0020471	-0.0166368	-0.000855715
Methanobrevibacter_ruminantium_M1_uid45857|hypF	5.58222	0.0171111	-0.00234736	0.000146412	0.0190749	0.00161689	0.000493344	-0.0231299	0.00522467	-0.0282845	0.00522467	-0.0125437	-0.0202923	0.00277068	0.00922235	-0.0123002	0.0117464	0.0173912	-7.0023e-05	0.00123018	0.00771526
Methanobrevibacter_ruminantium_M1_uid45857|argS	6.89408	0.00786265	0.00163728	-0.00489335	0.0290857	-0.0059047	0.00127036	0.00958627	0.00506293	-0.0149976	-0.0143501	0.0128608	-0.0428345	0.0173009	0.0101906	-0.000647513	0.0116984	-0.00749881	0.00170203	-0.0184233	0.00129194
Methanobrevibacter_ruminantium_M1_uid45857|minD	4.03848	0.0206925	-0.0107363	0.00267479	-0.0148723	-0.0363449	-0.00549818	-0.00580776	0.000681081	0.00723184	-0.011888	0.0325309	-0.00712039	-0.0132501	0.0184387	-0.000730614	0.00612973	0.0384996	0	-0.0185378	-0.00209278
Methanocella_paludicola_SANAE_uid42887|hypF	30.6639	0.0336287	0.00066674	-0.0319722	0.0111627	0.0314097	0.00250548	-0.0674084	0.0125899	-0.0438954	0.020622	-0.00628715	-0.0482865	0.000541726	0.0265185	-0.0111783	0.0425411	-0.00669865	0.00138036	0.0402804	-0.00812068
Methanocella_paludicola_SANAE_uid42887|glyS	26.7773	0.020131	-0.00361048	-0.0235672	-0.00240899	0.00965998	-0.00573111	-0.0197945	-0.00190436	-0.0164364	-0.000288358	0.000985222	-0.0125015	0.00152589	0.0203472	-0.0021747	0.00633786	0.0116184	0.00165205	0.0165565	-0.000396492
Methanocella_paludicola_SANAE_uid42887|ileS	27.0099	0.0363663	0.00196924	-0.0189459	0.00132858	0.0237937	-0.00429558	-0.0312156	-0.00136709	-0.027215	0.0075584	0.0107862	-0.0237001	0.00147212	0.0130854	-0.016336	0.0260658	-0.00341773	0.00465705	0.0104755	-0.0110654
Methanocella_paludicola_SANAE_uid42887|mcrB	16.5916	-0.0316027	0.00677201	0.00677201	0	0.00902935	-0.00451467	-0.00451467	-0.00451467	0.0225734	-0.0158014	0.0112867	-0.0112867	-0.00225734	0.00225734	-0.00677201	0.00677201	0.0112867	0.00451467	0.00902935	-0.00902935
Methanocella_paludicola_SANAE_uid42887|mcrC	19.0351	-0.012987	-0.0011544	-0.00880231	0.0167388	-0.0161616	-0.001443	-0.00634921	-0.001443	-0.0141414	-0.0109668	0.0012987	0.0036075	0.00750361	0.0018759	0.0021645	0.0209235	0.0209235	0	0.00880231	-0.0103896
Methanocella_paludicola_SANAE_uid42887|hisA	21.1157	0.0130037	3.47228e-05	-0.0243407	0.00470494	0.00916683	0.00843765	-0.0282817	0.00425355	-0.0533516	0.00435771	0.00487856	-0.0288026	0.00432299	-0.0122398	0.03382	0.0126565	0.0211636	6.94457e-05	0.0176392	0.00850709
Methanocella_paludicola_SANAE_uid42887|pheS	23.3179	0.0286667	-0.0059596	-0.0330909	0.00454545	0.0207475	-0.0156162	-0.0113333	0.00420202	-0.0271313	0.0143636	0.0029899	-0.0277374	0.0102626	0.0105051	0.000464646	0.0105253	0.00850505	0.00418182	-0.00543434	0.00634343
Methanocella_paludicola_SANAE_uid42887|pheT	23.8262	0.0163499	0.00363296	-0.0269257	0.0109544	0.0109609	-0.0179983	-0.0142903	0.0054576	-0.0305782	0.00546412	0.0146395	-0.0197838	0.00364601	8.48669e-05	-0.00534662	0.0181387	0.00913625	0.00181158	-0.00348281	0.0181289
Methanocella_paludicola_SANAE_uid42887|gltX	23.4377	0.0125178	0.00327169	-0.0218587	-0.00540541	0.00900901	-0.000995733	-0.00706496	0.00635372	-0.0165481	0.00630631	-0.0128971	-0.00644855	0.0100522	0.027027	-0.00625889	-0.00327169	0.000758653	0.00497866	0.00331911	-0.00284495
Methanocella_paludicola_SANAE_uid42887|fni	25.8689	0.0443603	-0.00849805	0.00237503	-0.0003314	0.0107468	-0.00579161	-0.0482976	-0.000110467	-0.03127	0.0279323	0.00516037	-0.0395944	-0.00291159	0.0110782	-0.0200181	0.0419063	-0.000236714	-6.31238e-05	0.0220933	-0.00852961
Methanocella_paludicola_SANAE_uid42887|pheA	24.1046	0.0180486	-0.000165837	-0.000580431	0.0107242	0.0292427	-0.0189055	-0.0228579	0.0184356	-0.0228303	0.0221669	0.0067717	-0.0784411	0.00726921	0.0182698	0.0143726	0.044251	0.00342731	-5.52792e-05	-0.026534	-0.0226092
Methanocella_paludicola_SANAE_uid42887|proS	23.0218	0.0177032	0.0124656	-0.0391396	0.00248578	0.0088149	-0.0119611	-0.0214273	-0.002816	-0.00685195	0.0162356	-0.0176573	-0.000963126	0.0143185	0.0155935	0.0115025	0.000825537	-0.00812695	0.0102275	0.00657677	-0.00780591
Methanocella_paludicola_SANAE_uid42887|gatB	22.6573	0.0246457	0.00608303	-0.00564405	0.00545591	-0.00307287	-0.0024144	-0.0137339	-0.00445253	-0.0245516	-0.0216042	0.0325787	-0.0134203	-0.00470337	-0.00282202	0.00360592	0.0287219	-0.00498558	0.00203813	-0.0117271	0.0100025
Methanocella_paludicola_SANAE_uid42887|hypB	25.6583	-0.0067791	0.000661376	0.0208333	-0.0332341	0.0117394	-0.0171958	-0.0512566	0.0109127	-0.0373677	0.0147156	0.0120701	-0.00198413	0.000496032	0.00992063	0.00992063	0.0329034	-0.00744048	0	0.030754	0.000330688
Methanocella_paludicola_SANAE_uid42887|pyrE	26.5944	-0.00285454	0.00583055	-0.0130276	-0.0039174	0.0418767	0.0172791	-0.00825995	0.011236	-0.0456726	0.0226845	-0.0128151	-0.0698451	0.000637716	0.0174916	0.0245976	0.0233222	-0.0143031	0	0.00446401	0.00127543
Methanocella_paludicola_SANAE_uid42887|argS	26.4945	0.0303925	-0.00351477	-0.0332807	0.0178997	0.00374032	-0.00695436	-0.0245658	0.00359622	0.000300729	-0.00343333	0.0127309	-0.0458236	0.00713605	0.021358	0.0090532	0.0107887	-0.00516878	0.00355863	0.000281934	0.00190462
Methanocella_paludicola_SANAE_uid42887|purM	26.995	0.00022305	-0.00547329	-0.0350617	0.0029597	0.051636	-0.0015785	-0.0134602	-0.00820994	-0.0193195	0.0105262	-0.00850162	-0.0304892	0.00051473	0.0191222	-0.0160338	0.0157422	0.0227596	0.00898204	-0.00747216	0.0131342
Methanocella_paludicola_SANAE_uid42887|nrdD	25.4328	0.00719458	-0.000344788	-0.0212389	0.00989541	0.0121825	0.00402253	-0.0143662	0.000402253	-0.030123	0.000609125	0.006505	-0.0141593	0.00815998	0.017044	-0.00794162	0.0229514	0.00999885	-0.00283875	-0.00155155	-0.00640156
Methanocella_paludicola_SANAE_uid42887|tpiA	26.5759	-0.0270722	0.00559474	-0.0133107	0.00999629	0.00623111	0.0183486	-0.0133107	0.0147691	0.018985	-0.00357957	-0.0260646	-0.0452352	0.0309169	0.0121971	-0.0109243	0.00779551	-0.00615156	0.00458716	-0.000928037	0.0171554
Methanocella_paludicola_SANAE_uid42887|hemA	32.7959	0.064051	0.0061881	-0.0315902	-0.00782186	0.04748	-0.027427	-0.0271873	0.00838958	-0.0713934	-0.0042831	0.0443575	-0.0295086	0.00818142	0.0035703	0.00788494	0.0402511	-0.00814988	-0.0052356	-0.00321075	-0.0145461
Methanocella_paludicola_SANAE_uid42887|cysG	36.4356	0.108715	-0.005356	-0.0181628	0.00249946	0.036754	-0.0461092	-0.0564403	-0.00516556	-0.0769121	0.00937894	0.0447999	-0.0503225	0.00918851	0.0377062	-0.0271608	0.0222095	-0.010712	0.00956938	0.026042	-0.0105216
Methanocella_paludicola_SANAE_uid42887|alaS	25.4723	0.0223644	-0.00414525	-0.0151495	-0.00245	0.0104846	0.0161562	-0.036685	0.00635883	-0.0166849	-0.00604836	0.000319565	-0.0146402	0.00329698	0.0148845	0.000385817	0.0210173	-0.0176644	0.00273189	0.000319565	0.0151482
Methanosaeta_concilii_GP6_uid66207|glnA	16.5821	-0.0108169	-0.0134428	-0.0198764	0.0092716	-0.00419141	-0.00873631	0.000252495	0.0045954	-0.0334505	0.0113522	0.00705975	0.0114633	0.0113522	0.00249465	-0.00199976	0.0339353	0.0046964	6.05987e-05	-0.022169	0.0181493
Methanosaeta_concilii_GP6_uid66207|gltX	24.6347	0.0192654	0.00351335	-0.00248513	-0.0112492	0.0264211	-0.00742639	-0.00227884	-0.00554723	-0.0310948	-0.00556012	-0.0095892	-0.0217892	-0.00012893	0.02655	0.00151816	0.0317878	-0.0110042	0.00886719	-0.00231752	-0.00745217
Methanosaeta_concilii_GP6_uid66207|hisA	25.8953	0.0705394	0	-0.0248963	0.0165975	0.0207469	0.0124481	-0.0456432	0.00414938	-0.0871369	-0.00414938	0.0207469	-0.0456432	0.0207469	-0.0124481	-0.00829876	0.06639	0.0165975	0	-0.0124481	-0.00829876
Methanosaeta_concilii_GP6_uid66207|gatB	22.1595	0.044423	0.00205976	-0.0131553	0.00612497	-0.000280671	0.00415575	-0.0130648	0.0105433	-0.0343868	-0.0192803	0.0209326	-0.0172205	-0.0107606	-0.00870081	0.0210594	0.0274017	-0.0214578	-1.81078e-05	-0.00247624	0.00410142
Methanosaeta_concilii_GP6_uid66207|nifH	21.1206	0.027858	0.00715608	0.0251583	-0.0169176	0.00477465	-0.00661377	-0.0259599	0.00787522	-0.0223171	-0.00562347	-0.0097615	-0.0316777	-0.00661377	0.0160216	0.0189925	0.0450467	-0.00931351	0	0.0045035	-0.0225882
Methanosaeta_concilii_GP6_uid66207|mcrB	17.3123	-0.00189325	-0.0021169	0.00554452	-0.0196607	0.0181419	-0.0084208	-0.0147715	-0.00197647	-0.00348483	-0.00376569	0.0174397	0.00342761	0.0120357	-0.00621028	-0.0147247	0.0119888	0.00328718	0.00235096	0.0112763	-0.00846761
Methanosaeta_concilii_GP6_uid66207|argS	23.7221	0.0454001	9.46492e-05	-0.0309124	0.0147968	0.000586825	0.00220217	-0.0260096	0.0126514	-0.0348057	-0.0103735	0.0152511	-0.0455957	0.0197754	0.00917466	0.0130679	0.0236686	-0.00847426	0.005395	0.000851843	-0.00674533
Methanosaeta_concilii_GP6_uid66207|mch	17.3241	-0.00109827	0.00279301	0.00845476	0.00532091	0.0112099	0.0148739	0.0115129	-0.000151485	-0.0315657	-0.000454455	-0.0133686	-0.0126869	0.0181971	-0.000454455	-0.00702512	0.00890921	0.00562388	0.00607834	-0.0257146	-0.000454455
Methanosaeta_concilii_GP6_uid66207|ileS	22.6833	0.0420196	0.00168993	-0.0122088	0.00929462	0.0142524	-0.00259735	-0.0146914	0.00151543	-0.0464318	0.00148053	0.0158027	-0.0352525	0.0100973	0.00600201	-0.00292891	0.0402773	-0.0180538	0.00617651	-0.00612692	-0.0103168
Methanosaeta_concilii_GP6_uid66207|mcrC	21.5005	0.017735	-0.00176884	0.00763394	-0.0127543	-0.0239957	-0.00221105	-0.0558116	-0.00221105	-0.00246707	-0.00221105	0.0223432	-0.00176884	0.0153377	-0.0090304	0.0052367	0.027836	0.0186194	0	0.00542289	-0.00593493
Methanosaeta_concilii_GP6_uid66207|hemA	24.6039	0.0238144	3.43543e-05	0.010746	-0.0155694	0.0106018	-0.0287615	-0.0259856	0.0026659	-0.0417062	0.0105605	0.0448255	-0.0418161	0.0131715	4.12252e-05	0.0290088	0.0342238	-0.00251474	-0.00261093	0.000185513	-0.0209149
Methanosaeta_concilii_GP6_uid66207|purM	23.9317	0.0190012	-0.00239787	-0.0104312	-0.0145431	0.0377514	0.001714	-0.0247578	0.00395606	-0.0608558	-0.00417247	0.022334	-0.0302721	0.0127079	0.00744466	0.00837957	0.0311464	0.0112449	0.00302115	-0.0126732	0.00140237
Methanosaeta_concilii_GP6_uid66207|gcp	26.3247	0.0699367	-0.00619998	-0.0133893	-0.0210624	0.0251297	0.000923402	-0.0545467	0.00576027	-0.0672324	0.015434	-0.00270425	-0.0263609	0.0143347	0.0129716	0.00969572	0.0388049	-0.00892622	0.00356169	0.0150822	-0.0112127
Methanosaeta_concilii_GP6_uid66207|glnA	16.5821	-0.0108169	-0.0134428	-0.0198764	0.0092716	-0.00419141	-0.00873631	0.000252495	0.0045954	-0.0334505	0.0113522	0.00705975	0.0114633	0.0113522	0.00249465	-0.00199976	0.0339353	0.0046964	6.05987e-05	-0.022169	0.0181493
Methanosaeta_concilii_GP6_uid66207|rpsH	18.5138	-0.0463829	-0.015625	0.0161171	0.000246063	0.0556102	6.15157e-05	0.0319882	-0.00775098	-0.0382628	0.0159941	0.0239296	-0.0230684	0.000246063	0.00799705	-0.00762795	0.0321727	0.000492126	-0.00775098	-0.0306348	-0.00775098
Methanosaeta_concilii_GP6_uid66207|pyrE	25.6272	0.0162162	0	-0.0108108	0.0162162	0.0216216	-0.00540541	-0.0108108	0.0162162	-0.0648649	0.00540541	0.0324324	-0.0756757	0.0108108	0.0216216	0.0324324	0.0540541	-0.027027	0	-0.0324324	0
Methanosaeta_concilii_GP6_uid66207|glyS	21.0013	0.0234457	-0.00535242	-0.0133915	-0.00251879	0.00780824	-0.00925654	-0.0164561	-0.000209899	-0.0354939	-0.00377818	0.00430293	-0.0177155	0.0169808	0.0133706	0.00119642	0.0251669	-0.00396709	0.00163721	0.00952941	0.00470173
Methanosaeta_concilii_GP6_uid66207|pheS	24.3215	0.0317211	-0.0040239	-0.0383426	0.00976096	0.0396255	-0.0201355	-0.0222231	0.00192829	-0.054239	0.00788048	0.00957769	-0.0380637	0.0138805	0.0157769	0.0197371	0.019753	-0.00415139	0.00791235	-0.000247012	0.00387251
Methanosaeta_concilii_GP6_uid66207|pheT	25.8012	0.0387757	-0.001726	-0.0170426	0.00428206	0.0134457	-0.00861024	-0.0390788	0.00932172	-0.0555812	0.0111861	0.00287228	-0.0413186	0.00565232	0.0059883	0.0187225	0.0441316	-0.0122006	0.00731903	0.013584	0.000276687
Methanosaeta_concilii_GP6_uid66207|alaS	24.9336	0.0574672	-0.00357289	-0.011788	-0.000115931	0.017381	0.0015922	-0.0279122	0.00738628	-0.0313803	-0.00380352	0.0227348	-0.0294834	0.00385532	0.020357	-0.0118607	0.0300693	-0.0176338	-0.00353096	-0.00916841	-0.0105929
Methanosaeta_concilii_GP6_uid66207|nrdD	21.6065	0.0154987	0.00152486	-0.00787787	0.00220334	0.00498578	0.0138094	-0.024038	-0.00476305	-0.0329233	0.00698694	0.0040366	-0.0241613	0.0202001	0.0228181	-0.0175033	0.019107	0.00346092	0.00282356	0.00356372	-0.00975225
Methanosaeta_concilii_GP6_uid66207|proS	25.7594	0.042764	0.0119588	-0.0123069	-0.0135211	0.00290599	-0.0129185	-0.0230604	-0.00132577	-0.0254754	0.000848139	-0.0136372	-0.0161816	0.0258504	0.00990983	-0.00216945	0.0222302	-0.00132131	0.00761093	0.0088251	-0.0109856
Methanosaeta_concilii_GP6_uid66207|fni	20.1418	0.0306386	-0.000463052	-0.0103029	0.00385877	0.0196797	-0.0146247	-0.0498939	-0.00875941	-0.0405943	0.010573	0.0307158	-0.0484276	-0.00327995	0.0185607	0.0116921	0.0432954	-0.00389736	-0.000308702	0.023114	-0.0115763
Methanosaeta_concilii_GP6_uid66207|ftsY	21.0615	0.0515349	0	0.000962199	0.0114548	-0.00525773	0.0160825	-0.032543	0.00844215	-0.0350401	-0.0212486	-0.013173	0.00274914	-0.0260481	0.00532646	0.000790378	0.0119931	-0.00471936	0.00515464	0.0280756	-0.00453608
Methanosaeta_concilii_GP6_uid66207|tpiA	20.0166	0.0535663	0.000758507	-0.0278817	0.0138362	0.005048	0.00904977	-0.000732352	0.00528339	-0.0183349	-0.00376638	-0.0225983	-0.0364345	0.0168441	-0.0112991	0.00177857	0.0253969	-0.00224937	0	-0.0251092	0.0168441
Methanosarcina_acetivorans_C2A_uid57879|argS	16.2535	0.0351487	-0.00177925	-0.0213666	0.0210799	-9.65967e-05	0.00169512	0.00339958	0.00702975	-0.0230773	-0.0176928	-0.00544992	-0.0512835	0.0140875	0.00701417	0.0157795	0.0210892	-0.00183845	0.0035211	0.00162345	-0.00888378
Methanosarcina_acetivorans_C2A_uid57879|nrdD	12.3287	0.0081913	0.000866891	-0.00762864	0.0033498	0.0055939	0.0101573	-0.0132978	-0.00601917	-0.00892734	0.0156269	-0.00266937	-0.0118028	0.0118093	0.0231836	-0.0106611	0.00382086	-0.00408911	0.00216559	-0.00932317	-0.0103471
Methanosarcina_acetivorans_C2A_uid57879|glyS	17.0898	0.0227904	-0.00260755	0.00288083	-0.00574457	0.0154973	-0.00335337	-0.0213158	0.000552253	-0.0300266	-0.0115347	0.000466853	-0.0124001	0.010248	0.00611464	-0.00270433	0.0146205	0.00709959	-0.000432693	0.00896131	0.00088816
Methanosarcina_acetivorans_C2A_uid57879|moaA	12.0672	-0.00708684	0.0026311	-0.0115627	-0.00260086	0.0217242	-0.00971794	-0.0145668	-0.02618	0.0045263	0.00674409	0.0236093	-0.00858888	-0.01122	0.00376016	0.0232162	0.0228432	-0.0044759	-0.000372991	-0.00932478	-0.00335692
Methanosarcina_acetivorans_C2A_uid57879|purM	15.5677	-0.00515925	9.93756e-05	0.00363549	-0.00520894	0.0325124	-0.00261689	-0.0164715	0.00303924	-0.0164467	-0.0112626	0.0266823	-0.0371002	9.93756e-05	0.00311377	0.00326283	0.0174901	0.0147987	0.00289017	-0.0222519	0.00889412
Methanosarcina_acetivorans_C2A_uid57879|pheS	20.5512	0.0493984	-0.00186992	-0.022374	0.000813008	0.0293333	-0.0153821	-0.0292195	0.000260163	-0.0428618	0.00239024	0.0137561	-0.0377398	0.0144878	0.0128455	0.00481301	0.0149106	0.00271545	0.00429268	0.00100813	-0.00157724
Methanosarcina_acetivorans_C2A_uid57879|alaS	13.6591	0.022184	-0.00160102	-0.00792389	-0.00556296	0.0093722	0.00748879	-0.0147715	0.0091298	-0.0259023	0.000121197	0.0112544	-0.0124906	-0.00428312	0.0162574	0.00160344	0.0191407	-0.0118895	-0.00368319	0.000443583	-0.00888741
Methanosarcina_acetivorans_C2A_uid57879|hisA	17.0642	0.035854	0.0121772	-0.00557202	-0.0173427	0.0229317	0.016191	-0.0468626	-0.00421712	-0.0755017	-0.00442036	0.0190533	-0.0254382	0.0201372	-0.000609704	0.0319756	0.0242866	0.0158523	-0.00013549	-0.005843	-0.0125159
Methanosarcina_acetivorans_C2A_uid57879|cysG	23.0269	0.0469923	-0.00583446	-0.0176843	-0.00515604	0.0420172	-0.0523293	-0.0176843	-0.00085934	-0.0752374	0.00866124	0.0431253	-0.0374039	0.0173225	0.0078019	0.0108774	0.00976934	0.0110583	0.00909091	0.00762099	-0.00214835
Methanosarcina_acetivorans_C2A_uid57879|hemA	15.7668	0.0223537	-0.00221944	0.0231505	-0.013715	0.0216025	-0.0223196	-0.010346	0.00820624	-0.0273389	-0.0105167	0.0171181	-0.0354541	0.0121102	-0.00266333	-0.000182108	0.0150808	-0.0049283	-0.00306169	0.0119281	0.00119508
Methanosarcina_acetivorans_C2A_uid57879|gltX	15.585	0.0235168	0.0030808	-0.0092144	-0.0133501	0.0166083	-0.00156841	-0.00456519	-0.00104561	-0.00223125	0.00233394	-0.0158241	-0.0225925	-0.000746861	0.0173552	0.0105214	-0.00238995	-0.00502264	0.00818746	0.00211922	-0.00517201
Methanosarcina_acetivorans_C2A_uid57879|idi	15.2238	0.0443373	-0.000463052	-0.00482346	-0.00162068	0.0114605	-0.000926105	-0.0553733	-0.00327995	-0.0405943	0.0078333	0.0224966	-0.0402084	0.00493922	0.0213004	-0.0102257	0.0295968	-0.00389736	-0.00304843	0.0313332	-0.00883658
Methanosarcina_acetivorans_C2A_uid57879|oppF	17.204	0.0283665	0.000357776	-0.0140384	-0.021211	0.032302	0.0104096	-0.021228	0.0014311	-0.0205125	0.00250443	0.011091	-0.0707885	0.0107673	0.0283665	0.0387761	0.0154355	-0.000374813	-0.00395257	-0.0348746	0.00717255
Methanosarcina_acetivorans_C2A_uid57879|hypB	15.1792	0.000300288	-0.00888853	0.00924888	-0.0129925	0.000300288	-0.00880846	-0.0308696	0.0046845	-0.0263853	0.0045844	0.00930894	-0.0265855	-0.00890855	0.00904869	0.0180173	0.0269659	0.00470452	0.00896861	0.0317505	-0.00444427
Methanosarcina_acetivorans_C2A_uid57879|nifH	9.42337	0.0229335	0.00672669	0.00927098	-0.00296253	0.00685449	0.011246	-0.060029	0.0113506	-0.00119663	0.00849259	-0.00714493	-0.0102353	0.00397328	0.000778391	-0.0220273	0.00760964	0.0157653	0	0.0105954	-0.0120012
Methanosarcina_acetivorans_C2A_uid57879|nifH	9.42337	0.0229335	0.00672669	0.00927098	-0.00296253	0.00685449	0.011246	-0.060029	0.0113506	-0.00119663	0.00849259	-0.00714493	-0.0102353	0.00397328	0.000778391	-0.0220273	0.00760964	0.0157653	0	0.0105954	-0.0120012
Methanosarcina_acetivorans_C2A_uid57879|oppF	17.204	0.0283665	0.000357776	-0.0140384	-0.021211	0.032302	0.0104096	-0.021228	0.0014311	-0.0205125	0.00250443	0.011091	-0.0707885	0.0107673	0.0283665	0.0387761	0.0154355	-0.000374813	-0.00395257	-0.0348746	0.00717255
Methanosarcina_acetivorans_C2A_uid57879|nifH	9.42337	0.0229335	0.00672669	0.00927098	-0.00296253	0.00685449	0.011246	-0.060029	0.0113506	-0.00119663	0.00849259	-0.00714493	-0.0102353	0.00397328	0.000778391	-0.0220273	0.00760964	0.0157653	0	0.0105954	-0.0120012
Methanosarcina_acetivorans_C2A_uid57879|mch	13.1745	-0.00567113	0.00325029	0.0221734	-0.00271018	0.00986661	0.0126732	0.0128276	-0.00615337	-0.0213053	-0.00911432	-0.0243434	0.00334674	0.00319242	0.00334674	-0.00888284	0.000135027	0.00959656	0.00624982	-0.0149398	0.006462
Methanosarcina_acetivorans_C2A_uid57879|dppE	11.6386	0.0215931	0.00589965	-0.0238907	0.0077299	0.00767149	0.0048677	-0.0101443	0.00389416	-0.0279016	-0.00796355	-0.0190814	0.00371892	0.00584124	0.00681477	0.0116825	0.0117409	-0.0089955	0.0157519	-0.00223914	-0.00699001
Methanosarcina_acetivorans_C2A_uid57879|pheT	16.0512	0.0135296	-0.00535555	-0.0110257	0.00278873	0.00284834	-0.00289471	-0.029583	0.00396781	-0.0315371	0.0113669	0.00157984	-0.0247044	0.00210314	0.00994933	-0.00295433	0.0151856	0.00636903	2.98082e-05	0.0250753	0.0132614
Methanosarcina_acetivorans_C2A_uid57879|trkA	9.90623	0.0145948	0.00657523	-0.00115142	-0.00772665	-0.0190086	0.00868617	-0.0418754	0.00663583	-0.0190692	0.0222002	0.00102012	0.0128474	0.00434308	0.00186854	-0.0164734	0.0152008	0.00391888	0.00223214	0.0189379	-0.0137565
Methanosarcina_acetivorans_C2A_uid57879|ileS	17.4394	0.0397432	0.0016271	-0.0059965	-0.00239311	0.0101575	-0.00560343	-0.0187683	-0.00426336	-0.0287247	-0.000526522	0.0116091	-0.0287485	0.00428713	0.00958525	-0.00980098	0.0229275	0.00351929	0.00413356	0.00771866	-0.0104829
Methanosarcina_acetivorans_C2A_uid57879|oppF	17.204	0.0283665	0.000357776	-0.0140384	-0.021211	0.032302	0.0104096	-0.021228	0.0014311	-0.0205125	0.00250443	0.011091	-0.0707885	0.0107673	0.0283665	0.0387761	0.0154355	-0.000374813	-0.00395257	-0.0348746	0.00717255
Methanosarcina_acetivorans_C2A_uid57879|hmgA	10.3334	0.00391017	-0.00320337	0.000262198	0.00534656	0.000136799	0.0124487	-0.0329229	0.00634975	-0.0157661	0.00829913	0.00736434	-0.0141359	-0.00357957	0.00817373	-0.00263338	0.00987232	0.00371637	-0.000125399	0.00308938	0.00339717
Methanosarcina_acetivorans_C2A_uid57879|pheA	13.9754	0.0266573	-0.00737304	0.0177379	-0.0131998	0.0228363	-0.00719376	-0.00473981	0.01283	-0.00100847	0.00755233	0.00426919	-0.0625252	0.0023643	0.014466	0.0213796	0.0279347	0.00172561	-0.00445968	-0.0340415	-0.0252118
Methanosarcina_acetivorans_C2A_uid57879|pyrE	11.517	0.0183997	0.00444681	-0.0283318	0.0306484	-0.00575156	-0.000958594	0.0179204	0.0197044	-0.0553588	0.0290774	-0.0288111	-0.0416722	0.00841433	0.00841433	0.0198376	0.0227134	-0.0106777	0.00985222	-0.000213021	-0.0176541
Methanosarcina_acetivorans_C2A_uid57879|glnA	8.93222	-0.017627	-0.00581364	-0.0123451	0.0168029	-0.0082419	-0.0131073	0.00916358	0.00353604	-0.00284479	0.0094649	0.0236445	0.00654035	0.00353604	-0.0221911	0.0071873	0.0058934	0.000877364	-0.00752406	-0.0251157	0.0281643
Methanosarcina_acetivorans_C2A_uid57879|nifH	9.42337	0.0229335	0.00672669	0.00927098	-0.00296253	0.00685449	0.011246	-0.060029	0.0113506	-0.00119663	0.00849259	-0.00714493	-0.0102353	0.00397328	0.000778391	-0.0220273	0.00760964	0.0157653	0	0.0105954	-0.0120012
Methanosarcina_acetivorans_C2A_uid57879|gcp	16.1229	0.0348383	-0.00910741	0.0202498	-0.0181714	0.00380309	0.00553784	-0.0290736	-0.00360627	-0.0345514	-0.00361294	0.00382645	-0.0181948	-0.0018048	0.0165068	-0.00538104	0.0311453	0.00192156	1.00081e-05	0.00925086	-0.00358625
Methanosarcina_acetivorans_C2A_uid57879|proS	16.5687	0.0336051	0.00806159	-0.00461957	-0.00661232	0.00588768	-0.0165761	-0.00552536	-0.000996377	-0.0182971	-0.000905797	-0.0249094	-0.0117754	0.00978261	0.0169384	-0.0057971	0.0211051	-0.00461957	0.00788043	0.00362319	-0.00625
Methanosarcina_acetivorans_C2A_uid57879|nifH	9.42337	0.0229335	0.00672669	0.00927098	-0.00296253	0.00685449	0.011246	-0.060029	0.0113506	-0.00119663	0.00849259	-0.00714493	-0.0102353	0.00397328	0.000778391	-0.0220273	0.00760964	0.0157653	0	0.0105954	-0.0120012
Methanosarcina_acetivorans_C2A_uid57879|oppF	17.204	0.0283665	0.000357776	-0.0140384	-0.021211	0.032302	0.0104096	-0.021228	0.0014311	-0.0205125	0.00250443	0.011091	-0.0707885	0.0107673	0.0283665	0.0387761	0.0154355	-0.000374813	-0.00395257	-0.0348746	0.00717255
Methanosarcina_acetivorans_C2A_uid57879|hypF	17.8973	0.0347027	0.00121155	-0.00809379	-0.018304	0.0281875	0.00890317	-0.0611508	0.0141465	-0.0378246	0.00381062	0.00608794	-0.0442393	0.0141465	0.0218331	-0.00801838	0.0166702	0.00759107	0.00257895	0.0256638	-0.00790275
Methanosarcina_acetivorans_C2A_uid57879|glnA	8.93222	-0.017627	-0.00581364	-0.0123451	0.0168029	-0.0082419	-0.0131073	0.00916358	0.00353604	-0.00284479	0.0094649	0.0236445	0.00654035	0.00353604	-0.0221911	0.0071873	0.0058934	0.000877364	-0.00752406	-0.0251157	0.0281643
Methanosarcina_acetivorans_C2A_uid57879|oppF	17.204	0.0283665	0.000357776	-0.0140384	-0.021211	0.032302	0.0104096	-0.021228	0.0014311	-0.0205125	0.00250443	0.011091	-0.0707885	0.0107673	0.0283665	0.0387761	0.0154355	-0.000374813	-0.00395257	-0.0348746	0.00717255
Methanosarcina_acetivorans_C2A_uid57879|hisA	23.1458	0.0717779	0.011822	0.0136422	-0.0542011	0.0327818	0.00647178	-0.0751793	-0.000422872	-0.072642	-0.00169149	-0.0105718	-0.0259055	0.0277257	0.0142122	0.0104063	0.0277257	-0.00465159	0.00816327	0.0479868	-0.0274499
Methanosarcina_acetivorans_C2A_uid57879|gatB	14.726	0.0343477	-0.00482436	-0.00515173	0.00303676	0.0167302	0.0130215	-0.00605199	0.00718485	-0.0192931	-0.0122289	0.00842541	-0.0231139	-0.0139131	-0.00863647	-0.00414809	0.00763714	0.0133618	0.00179621	-0.00638797	-0.00179191
Methanosarcina_acetivorans_C2A_uid57879|oppF	17.204	0.0283665	0.000357776	-0.0140384	-0.021211	0.032302	0.0104096	-0.021228	0.0014311	-0.0205125	0.00250443	0.011091	-0.0707885	0.0107673	0.0283665	0.0387761	0.0154355	-0.000374813	-0.00395257	-0.0348746	0.00717255
Methanosphaera_stadtmanae_DSM_3091_uid58407|glnA	-4.76938	-0.0267446	-0.00221192	-0.0222754	0.0405804	0.00240339	0.000136041	0.00237315	0.00229254	-0.00882249	-0.0111906	0.0316118	0.00234796	0.00453973	0.00236812	-0.0088628	0.00456996	-0.00215146	-0.00671134	-0.0178012	0.0135486
Methanosphaera_stadtmanae_DSM_3091_uid58407|gatB	-4.42378	0.0302045	0.000561353	0.0014765	0.00216522	-0.00857596	-0.00362285	0.000674566	0.000641546	-0.029497	-0.00953828	0.00485877	0.0197841	0.00349548	0.010694	-0.000688718	0.00618903	-0.0156943	-0.00426439	-0.0101468	0.00128309
Methanosphaera_stadtmanae_DSM_3091_uid58407|purM	-3.77648	0.00146618	-0.00268939	-0.0157844	0.0130448	0.0104727	-0.00520284	0.0195965	0.00619984	-0.0388244	-0.00514419	0.0132794	0.00111429	0.00900652	-0.00239615	0.00672766	0.000351883	0.0212889	0	-0.0330351	0.000527824
Methanosphaera_stadtmanae_DSM_3091_uid58407|mcrC	-3.69741	-0.00641887	-0.000497587	0.00318455	-0.00592128	-0.0127133	0.00430412	0.00218938	0.00923023	-0.00199035	-0.00554809	-0.00641887	0.0192068	0.00405533	-0.0110962	0.00380654	-0.0110962	0.0283127	0	-0.0171419	0.00455292
Methanosphaera_stadtmanae_DSM_3091_uid58407|hisA	-4.47253	-0.00752841	0.00850885	-0.0111175	-0.0116078	0.00161073	0.000140063	0.00203092	0.000140063	-0.0232155	-0.00808866	0.0140589	-0.00745837	0.0129384	-0.00358912	0.0260168	0.000210095	0.0131484	0.000140063	-0.0150568	0.00871895
Methanosphaera_stadtmanae_DSM_3091_uid58407|pheS	-1.15175	0.0161586	-0.01	-0.0369594	0.00222437	0.0156325	-0.00370986	0.00130368	0.0149478	-0.0250251	0.010882	-0.00315667	0.000158607	0.0226847	-0.00131528	0.0100928	0.00248743	0.00248743	-0.000460348	-0.021381	0.00294778
Methanosphaera_stadtmanae_DSM_3091_uid58407|pheT	-3.2116	0.0085732	-0.00365854	0.00438186	0.00306117	-0.0220158	0.00315804	-0.00444967	0.00162745	-0.0169074	-0.000193745	-0.015167	0.00662284	0.00701033	-0.00041978	-0.0021764	-0.000274472	0.0245765	-1.61454e-05	-0.00602869	0.0122963
Methanosphaera_stadtmanae_DSM_3091_uid58407|hmgA	-6.29246	-0.00837723	-0.00969418	-0.013645	0.0154009	-0.0111209	-0.0119988	-0.00599941	0.0076456	-0.0112306	0.000292654	-0.00621891	0.0206321	-0.00709687	0.00530436	0.00574334	0.00299971	0.00343869	3.65818e-05	0.018547	0.00534094
Methanosphaera_stadtmanae_DSM_3091_uid58407|fni	-3.76137	0.00426974	-0.00830542	0.0156342	-0.0104443	0.00140442	-0.0137455	0.00208241	0.00893499	-0.0129222	0.00310747	0.00422132	-0.0131644	0.00320433	0.0147141	-0.0245288	0.00606966	0.0293797	-0.00267162	-0.0047621	-0.0024779
Methanosphaera_stadtmanae_DSM_3091_uid58407|gltX	-2.97124	-0.000819292	0.00342438	-0.00138255	-0.00457651	-0.00437169	-0.0147473	0.0114605	0.00497016	-0.00846175	0.00316835	-0.0208183	0.0224505	0.0139536	0.00654153	-0.00409006	-0.0114765	0.0172243	0.00162258	-0.0188117	0.00473973
Methanosphaera_stadtmanae_DSM_3091_uid58407|proS	-3.33056	-0.000834338	0.00627144	-0.00639195	0.00953463	-0.00539075	-0.00304997	-0.00158524	0.0059377	-0.00171039	0.00384722	-0.0274636	0.0121674	0.0125012	-0.000834338	0.00138129	0.00129786	0.00736071	0.00405581	-0.00120979	-0.0158849
Methanosphaera_stadtmanae_DSM_3091_uid58407|pyrE	-5.99407	-0.00847252	0.000212572	-0.00179168	0.0185545	-0.00306711	0.0228971	0.0310659	0.011236	-0.0175828	0.0170665	-0.0128151	-0.0136654	-0.00498026	0.0118737	-0.00911023	-0.00476769	0.0137868	0	-0.0460978	-0.00434254
Methanosphaera_stadtmanae_DSM_3091_uid58407|dcd	-2.20319	-0.0037455	-0.0191957	0.00795919	0.0231876	0.0231876	-0.00793455	0.043714	-0.00418905	-0.0209452	0.0209699	-0.0220541	-0.0277956	0.00155241	0.0368636	-0.0165344	0.0112612	0.00773742	-0.00485437	-0.0315411	-0.0176433
Methanosphaera_stadtmanae_DSM_3091_uid58407|glyS	-5.63806	-0.0109035	-0.00705875	-0.0149465	0.00276343	-0.0075814	-0.00745524	0.0284813	0.00499219	-0.00609155	-0.00718491	-0.0128079	0.00991229	0.00842244	0.00827827	0.0133425	-0.00573111	0.0116184	-0.00179623	-0.0127538	0.00650006
Methanosphaera_stadtmanae_DSM_3091_uid58407|nifH	-3.28764	-0.00726776	0.00435334	0.00924323	-0.000256079	-0.0106334	0.00559715	-0.0304246	-0.00319489	-0.0130356	-0.00460942	-0.0188035	0.00737751	-0.0134868	0.0100359	0.0175841	-0.00203644	0.0297417	0	0.0149257	0.00488989
Methanosphaera_stadtmanae_DSM_3091_uid58407|hypB	-2.58346	0.0156045	-0.00409567	0.0200688	0.00282602	-0.0027441	-0.00360419	-0.00597969	-0.0171199	-0.0197412	0.000614351	0.00208879	-0.0163827	0.000368611	0.0142529	0.0234273	0.000368611	-0.0124099	0	0.00679882	-0.00434142
Methanosphaera_stadtmanae_DSM_3091_uid58407|mch	-6.65285	-0.00441743	-0.0094767	0.00215208	0.0142528	-0.00432304	0.00252964	0.0509326	-0.00628634	0.00791928	-0.000566337	-0.0319036	0.00858	0.0120063	0.00858	-0.010279	-0.0125255	0.0176792	-4.71947e-05	-0.0503379	0.00553122
Methanosphaera_stadtmanae_DSM_3091_uid58407|alaS	-5.15671	0.0116354	-0.00239237	-0.0178404	0.0036376	0.000247059	-0.00150346	0.00566125	0.00643967	-0.00995188	-0.00697227	-0.0031708	0.0105006	0.00739687	0.00407461	-0.000559917	0.00727396	0.000369968	-0.000150222	-0.0109227	-0.00377292
Methanosphaera_stadtmanae_DSM_3091_uid58407|tpiA	-4.73163	0.0110726	-0.00400771	-0.0067052	0.00842646	-0.0142582	0.00888889	0.0199615	0.000436737	-0.00580604	0.000436737	-0.0151574	-0.0102505	0.0297752	-0.00313423	0.000411047	-0.0200128	0.019088	0	-0.0400514	0.0208863
Methanosphaera_stadtmanae_DSM_3091_uid58407|hemA	-3.91337	-0.00747564	-0.0105574	0.00955663	-0.00224004	0.00377096	-0.0292266	0.011916	0.007078	-0.00615018	0.00681954	0.0379217	0.00535489	0.00192856	-0.000516933	-0.00931805	-0.00382398	0.016343	-0.0052356	-0.0200477	-0.00609716
Methanosphaera_stadtmanae_DSM_3091_uid58407|pheA	-6.11096	-0.0166702	-0.0115967	0.000778482	-0.00547622	0.00891227	-0.0234618	0.0256899	0.0139858	0.0150327	0.01412	0.0113014	-0.0176098	0.0209116	-0.00120799	0.00504671	-0.00813379	0.0166434	-0.00746269	-0.0245356	-0.0162676
Methanosphaera_stadtmanae_DSM_3091_uid58407|ileS	-1.76237	0.00395006	0.00356046	-0.00478792	0.0148432	0.00275193	-0.00550936	-0.00248792	0.00621156	-0.0266274	-0.00709709	0.00805412	-0.0134966	0.0157287	0.00307919	-0.00208366	0.00696692	0.00273268	0.0032717	-0.00815588	-0.000904782
Methanosphaera_stadtmanae_DSM_3091_uid58407|hypF	-0.520431	6.06397e-05	0.00132565	-0.0245608	0.00137113	0.00397527	-0.0103424	-0.0284283	0.0104115	-0.0141661	0.0130089	-0.010265	-0.0180774	0.0208011	0.0117321	-0.0206899	0.00263951	0.0377162	0.00130039	0.00785116	0.0143362
Methanosphaera_stadtmanae_DSM_3091_uid58407|argS	-6.87799	-0.0117428	0.00188036	-0.0166267	0.0165825	-0.0119132	-0.00136926	0.00791898	0.0072943	0.00805149	-0.0175164	0.0170369	-0.0277385	0.0251325	0.00738894	0.00949647	-0.0013314	-0.0013314	0.00182357	-0.0277196	0.0146832
Methanothermobacter_marburgensis_Marburg_uid51637|argS	16.7108	-0.00102852	-0.00169107	-0.000555275	0.0219397	0.0148725	-0.0067264	-0.00100959	0.0126514	-0.0365914	-0.013945	0.0152511	-0.0455957	0.0126325	0.0181032	-0.00478925	0.0308115	-0.00847426	0.00360929	-0.00807673	-0.00138819
Methanothermobacter_marburgensis_Marburg_uid51637|nrdD	17.0517	0.0206714	-1.68444e-05	0.00637391	-0.00136945	0.00250981	-0.0052386	-0.0104604	0.00255192	-0.0442114	-0.00132902	0.0167467	-0.0065592	-3.36887e-05	0.00904711	-0.0104553	0.0323732	-0.00136439	0.00257887	-0.00396685	-0.00784779
Methanothermobacter_marburgensis_Marburg_uid51637|moaA	16.1432	-0.0246288	0.00248385	-0.0256886	0.0347409	0.015157	-0.00416184	0.00452614	-0.0274659	-0.0483745	0.00930618	0.0109069	-0.0078821	-0.000529889	-0.00779378	0.018789	0.0613236	0.0054976	-8.83148e-05	-0.00876525	-0.00735221
Methanothermobacter_marburgensis_Marburg_uid51637|glnA	10.5901	-0.0398312	0.000142037	0.000791348	0.0299393	0.00289146	-0.00397703	0.0118195	0.00696995	-0.00385528	0.0114948	0.00739606	-0.0176937	0.000182619	0.0140616	-0.0175923	0.00935414	-0.0109267	-0.00440314	-0.010602	0.0138384
Methanothermobacter_marburgensis_Marburg_uid51637|alaS	13.7759	0.0264264	-9.73763e-05	0.00712096	-0.00377521	0.00955037	-0.00133081	0.000574271	0.00879633	-0.0484834	-0.00352053	0.00504359	-0.0170184	-0.0046491	0.00871393	0.000806476	0.0409405	-0.0104268	-0.00119598	-0.0138874	-0.00358794
Methanothermobacter_marburgensis_Marburg_uid51637|glyS	12.888	0.00627672	-0.00326809	-0.0104344	0.010039	-0.0023723	-0.000815479	-0.00744434	0.00917414	-0.0285665	-0.00837102	0.0101317	-0.0223083	0.00211283	0.00945215	0.0131836	0.0186881	0.00609138	0.00189661	0.0011738	-0.00463958
Methanothermobacter_marburgensis_Marburg_uid51637|fni	15.1471	0.0562409	-0.00828072	0.0245184	-0.0103044	0.0102639	-0.019435	-0.0291727	-0.00247693	-0.0472074	0.0146511	0.00158653	-0.0446171	-0.00535049	0.00907398	-0.00427392	0.0406265	0.000849927	0.000226647	0.0126275	0.000453294
Methanothermobacter_marburgensis_Marburg_uid51637|gltX	20.0785	0.0202409	-0.00176263	0.0113984	-0.0122895	0.0148061	-0.0160987	-0.0104975	0.00376028	-0.048394	0.00558167	-0.00675676	-0.0142479	0.00190952	0.0128966	0.00564042	0.0401684	-0.0160987	0.00368194	0.00764787	-0.00158637
Methanothermobacter_marburgensis_Marburg_uid51637|hmgA	15.301	-0.0021176	-0.0070813	0.00741468	0.00592063	0.0276337	-0.0142984	-0.0300291	0.0154529	-0.0481368	0.00809997	0.00986566	-0.016274	-0.0169531	0.0132057	0.00898281	0.0211019	-0.00327209	6.79113e-05	0.0222564	-0.00183978
Methanothermobacter_marburgensis_Marburg_uid51637|proS	18.385	0.0188873	0.00853202	-0.00334268	0.0101216	0.00582048	-0.00696587	-0.00949042	0.0104956	-0.0461197	0.0105189	-0.0204067	-0.00465171	0.00628799	-0.000467508	-0.00687237	0.0425432	-0.00495559	0.00633474	0.00147265	-0.0177419
Methanothermobacter_marburgensis_Marburg_uid51637|pheT	17.752	0.0111153	4.91394e-05	0.00967391	0.0130187	-0.00692538	-0.0106338	-0.0176181	0.00554292	-0.0521402	0.00556258	-0.00492377	-0.0323436	0.00190333	0.00751505	0.0147549	0.0364647	0.000285009	0.00182471	0.0221815	-0.00530706
Methanothermobacter_marburgensis_Marburg_uid51637|mch	11.5678	0.0102167	-0.0122968	0.0224265	0.0193595	0.0101587	0.00656927	0.00680147	-0.0092589	-0.0117454	-0.0184017	-0.0116293	-0.0059017	-0.0030089	0.0065983	-0.00242841	0.000203173	-0.00274768	2.90248e-05	-0.00841718	0.0034733
Methanothermobacter_marburgensis_Marburg_uid51637|hypB	13.1546	0.015985	-0.00864055	0.0204493	0.00331221	-0.00244816	-0.00345622	-0.0377304	-0.0123848	-0.0515553	0.000720046	0.0254896	-0.0253456	0.000432028	0.00518433	0.0144009	0.0372984	-0.0168491	0	0.0394585	-0.00432028
Methanothermobacter_marburgensis_Marburg_uid51637|lysC	10.2672	0.0023999	-0.00575765	-0.0211044	0.0250726	-0.00911541	-0.0116942	0.000884173	0.00228411	0.0135573	-0.00101048	0.0117469	-0.00941013	0.00442087	0.0134415	0.00124205	-0.00923119	-0.00498926	0.00278936	-0.00502084	-0.000505242
Methanothermobacter_marburgensis_Marburg_uid51637|hisA	14.8337	0.00296866	-8.43369e-05	0.00627467	0.00279999	0.0143204	0.0160915	-0.022771	-0.000168674	-0.0757008	0.00364336	-0.00168674	-0.029636	0.0159228	-0.00482407	0.0235469	0.0444624	0.0116048	-0.000168674	-0.0103228	0.00372769
Methanothermobacter_marburgensis_Marburg_uid51637|hemA	19.7683	0.022179	0.00198637	0.0112868	-0.00273619	0.0260596	-0.0192718	-0.0291247	0.00941882	-0.0546713	0.00407798	0.0269936	-0.0454498	-0.00324923	0.00941882	-0.00712989	0.0612355	0.000828751	-0.0052356	0.0122339	-0.0188508
Methanothermobacter_marburgensis_Marburg_uid51637|mcrB	9.68468	0.00902935	-0.00451467	0.0293454	0.00451467	-0.00902935	0	-0.0112867	-0.00451467	-0.00451467	-0.00225734	0.0225734	-0.00677201	0.00677201	-0.00225734	-0.0248307	0.00677201	0	0	-0.00451467	-0.00451467
Methanothermobacter_marburgensis_Marburg_uid51637|purM	18.9007	0.0141656	0.000373001	-0.014954	0.0169377	0.0322901	-0.00784999	-0.0233635	0.00943524	-0.0706075	-0.00479816	0.0202692	-0.027814	-0.00554416	0.00379783	0.0161917	0.0301453	0.0101812	0	0.00326376	-0.00211933
Methanothermobacter_marburgensis_Marburg_uid51637|pheA	18.1175	0.0244793	-0.011399	0.0205429	0.00636925	0.0356733	-0.000956755	-0.00889782	0.014447	-0.0454595	-0.000136679	0.0167432	-0.0712372	-0.00766771	0.00671095	0.00256957	0.0361517	0.0139686	-0.00379968	-0.00516648	-0.0229348
Methanothermobacter_marburgensis_Marburg_uid51637|trkA	8.99586	0.0110399	0.00483912	-0.0118988	-0.002849	-0.0118988	-0.00421066	-0.0202154	0.009364	-0.0164237	0.00946874	0.00209486	0.0240908	-0.00442014	0.00525809	-0.0216817	-0.00389643	0.0148316	0	0.0205086	-0.00400117
Methanothermobacter_marburgensis_Marburg_uid51637|gatB	14.9787	0.0306628	0.000664827	0.0199591	-0.00857152	-0.00596445	0.00763127	0.00119194	0.000759803	-0.0401746	-0.00710415	0.0098157	-0.015348	-0.00293474	0.0155475	0.00180453	0.0310427	-0.0198973	-0.00203722	-0.0141133	-0.00293474
Methanothermobacter_marburgensis_Marburg_uid51637|hypF	20.1135	0.0381638	0.00796836	-0.00856268	0.00428049	0.0225911	-0.00237391	-0.0528052	0.00794296	-0.0633676	0.0183868	-0.00459544	-0.0543054	-0.00119542	0.013275	0.00305967	0.0445981	0.00288188	0.00131395	0.0198786	0.00286495
Methanothermobacter_marburgensis_Marburg_uid51637|ileS	17.9275	0.0196783	0.00561946	0.00854118	0.0146391	0.00136415	-0.00136415	-0.00751298	0.00743154	-0.0479385	0.000712613	0.0107299	-0.0379416	-0.00211748	0.0130205	-0.00825613	0.0427364	-0.00630154	0.00450982	-0.00367505	-0.0138756
Methylacidiphilum_infernorum_V4_uid59161|rfaG	18.7513	0.039641	0.0120485	-0.00216011	-0.00621032	0.00943589	-0.0257024	-0.0262789	0.0163249	-0.039911	0.0150916	0.0034518	-0.0679559	0.0304094	0.0180107	-0.0166971	0.0407721	0.000328395	0.0127271	0.000883018	-0.0142086
Methylacidiphilum_infernorum_V4_uid59161|ileS	12.0055	0.0198851	0.00824023	-0.0116811	-0.0142157	0.0084151	0.00651925	-0.0222426	-0.00253349	-0.0224356	-0.0121855	0.0497122	-0.0347384	0.0137337	0.0182409	0.019015	0.024179	-0.021218	-0.000753862	-0.0190705	-0.00686579
Methylacidiphilum_infernorum_V4_uid59161|nrdD	10.4026	0.00640211	0.00501626	-0.0169745	-0.0182009	0.00707803	0.0346887	-0.0174719	-0.0161009	-0.0248199	-0.00667205	0.019708	-0.00804302	0.0214891	0.0342445	-0.00539248	0.00720343	-0.00284822	0.00140498	-0.012615	-0.00809616
Methylacidiphilum_infernorum_V4_uid59161|rfaG	18.7513	0.039641	0.0120485	-0.00216011	-0.00621032	0.00943589	-0.0257024	-0.0262789	0.0163249	-0.039911	0.0150916	0.0034518	-0.0679559	0.0304094	0.0180107	-0.0166971	0.0407721	0.000328395	0.0127271	0.000883018	-0.0142086
Methylacidiphilum_infernorum_V4_uid59161|alaS	11.4122	0.0210317	-0.00377485	-0.011264	-0.0142665	0.00496615	0.0236443	-0.0137628	0.0101817	-0.0216515	-0.012867	0.0262763	-0.0168476	0.0140486	0.0172883	0.0199106	0.0179978	-0.0205813	-0.000452789	-0.0277194	-0.0121575
Methylacidiphilum_infernorum_V4_uid59161|prsA	10.0594	-0.00166641	-0.0178003	-0.0390092	0.00636267	0.00598394	0.0198455	-0.0404484	0.000833207	-0.0207544	0.00780185	0.0215876	-0.00530223	0.00977125	-0.00181791	0.000151492	0.0249205	0.00363581	0	0.0254507	0.000454477
Methylacidiphilum_infernorum_V4_uid59161|rfaG	18.7513	0.039641	0.0120485	-0.00216011	-0.00621032	0.00943589	-0.0257024	-0.0262789	0.0163249	-0.039911	0.0150916	0.0034518	-0.0679559	0.0304094	0.0180107	-0.0166971	0.0407721	0.000328395	0.0127271	0.000883018	-0.0142086
Methylacidiphilum_infernorum_V4_uid59161|pheA	8.21514	-0.0144818	-0.0153951	0.0265369	-0.0137773	-0.00328776	0.00370525	-0.0158908	0.00628849	-0.00516648	-0.00046968	0.0575357	-0.0615802	0.00581881	0.015369	0.0277111	0.0298247	0.0151341	-0.00046968	-0.0331385	-0.0242668
Methylacidiphilum_infernorum_V4_uid59161|glnA	4.06191	-0.023108	-0.00774278	-0.00990915	-0.000641889	-0.00191229	-0.0108363	0.0254571	0.00168942	-0.018325	0.0136178	0.0122583	-0.00508162	0.0096417	0.0137828	-0.00635202	0.00811722	0.0249935	-0.00351256	-0.0446781	0.0225419
Methylacidiphilum_infernorum_V4_uid59161|rfaG	18.7513	0.039641	0.0120485	-0.00216011	-0.00621032	0.00943589	-0.0257024	-0.0262789	0.0163249	-0.039911	0.0150916	0.0034518	-0.0679559	0.0304094	0.0180107	-0.0166971	0.0407721	0.000328395	0.0127271	0.000883018	-0.0142086
Methylacidiphilum_infernorum_V4_uid59161|purM	11.1039	-0.0180618	0.0123482	-0.041317	-0.0153073	0.0270245	0.0131242	0.00388013	0.00959374	-0.0555328	-0.019503	0.0535885	-0.00682221	0.0272292	0.0307597	0.0135677	0.0155461	-0.0192813	0.00595238	-0.0348103	-0.00197844
Methylacidiphilum_infernorum_V4_uid59161|ffh	8.78974	-0.000808081	0.00681818	-0.00712121	0.00353535	-0.00727273	0.0254545	-0.0184848	0.00464646	-0.0355556	-0.0308081	0.0207071	-0.0128788	-0.00348485	0.000757576	0.00575758	0.0301515	-0.0124747	0.00227273	0.0351515	-0.00636364
Methylacidiphilum_infernorum_V4_uid59161|rfaG	18.7513	0.039641	0.0120485	-0.00216011	-0.00621032	0.00943589	-0.0257024	-0.0262789	0.0163249	-0.039911	0.0150916	0.0034518	-0.0679559	0.0304094	0.0180107	-0.0166971	0.0407721	0.000328395	0.0127271	0.000883018	-0.0142086
Methylacidiphilum_infernorum_V4_uid59161|argS	7.82743	-0.00515414	0.00323504	-0.0389789	-0.00459973	0.00557451	0.0249238	-0.0103692	0.0117278	-0.0158401	-0.0214573	0.047825	-0.0415316	0.0376325	0.0287559	0.00561716	0.00932131	0.00242476	0.00508712	-0.0415743	-0.00261971
Methylacidiphilum_infernorum_V4_uid59161|proS	14.3746	0.0248811	0.00129076	-0.00540082	-0.0137738	0.00380435	0.00490829	-0.0240149	-0.00242867	-0.0149117	-0.00416101	-0.0118886	-0.00721807	0.0336107	0.00730299	0.0136039	0.0209749	-0.0139946	0.0125679	-0.000543478	-0.0246094
Methylacidiphilum_infernorum_V4_uid59161|gatB	11.4698	0.0461566	0.00569318	-0.0176687	-0.00808476	-0.00836612	0.00342031	-0.021089	-0.00262458	-0.0114831	-0.021955	0.022421	-0.0183237	0.0236168	0.00250588	0.0213439	0.000514365	-0.0141296	-0.000140681	-0.00892885	0.00712197
Methylacidiphilum_infernorum_V4_uid59161|rfaG	18.7513	0.039641	0.0120485	-0.00216011	-0.00621032	0.00943589	-0.0257024	-0.0262789	0.0163249	-0.039911	0.0150916	0.0034518	-0.0679559	0.0304094	0.0180107	-0.0166971	0.0407721	0.000328395	0.0127271	0.000883018	-0.0142086
Methylacidiphilum_infernorum_V4_uid59161|hypF	11.9138	0.0153327	0.000766718	0.000410448	-0.0102021	0.00612882	0.024443	-0.0406262	0.00465777	-0.0199363	-0.00420299	0.0242739	-0.0525669	0.0135185	0.0118472	-0.00418493	0.0295999	-0.0161881	0.0151587	0.00270568	-0.000935822
Methylacidiphilum_infernorum_V4_uid59161|hypB	10.8765	-0.00446429	0.00948661	0.0273438	-0.0479911	0.015067	-0.00446429	-0.0457589	-0.00167411	-0.0496652	-0.00669643	0.0569196	-0.0362723	0.0178571	0.0172991	0.0329241	0.0452009	-0.00223214	0.0117188	-0.0530134	0.0184152
Methylacidiphilum_infernorum_V4_uid59161|nifH	11.8875	0.0335732	0.00120481	0.0271834	-0.00363593	-0.00122632	-0.015286	-0.0340358	0.0136401	-0.00631448	0.00189327	-0.00243113	-0.020471	-0.00181797	-0.00501285	-0.00398016	0.0251181	-0.00147374	0	-0.00260324	-0.00432439
Methylacidiphilum_infernorum_V4_uid59161|pyrE	14.713	-0.00777027	0.0258446	-0.0400056	0.0140484	0.0132601	0.0100225	-0.0235923	0.03125	-0.056616	0.0206363	0.063964	-0.0602477	0.0202421	0.0254505	0.00323761	0.0304617	-0.0284065	0	-0.0353885	-0.00639077
Methylacidiphilum_infernorum_V4_uid59161|hisA	10.5601	0.00654196	-0.00011712	-0.0187057	-0.0219181	0.0295643	0.0320238	-0.0558158	-0.000234239	-0.0236749	-0.00461786	0.0339479	-0.0419623	0.0358218	-0.0131508	0.0109256	0.0238422	0.0233737	0.00379802	-0.0312709	0.0116283
Methylacidiphilum_infernorum_V4_uid59161|rfaG	18.7513	0.039641	0.0120485	-0.00216011	-0.00621032	0.00943589	-0.0257024	-0.0262789	0.0163249	-0.039911	0.0150916	0.0034518	-0.0679559	0.0304094	0.0180107	-0.0166971	0.0407721	0.000328395	0.0127271	0.000883018	-0.0142086
Methylacidiphilum_infernorum_V4_uid59161|lysC	16.7373	0.054124	-0.00575765	-0.0235674	-0.00448402	-0.0140415	-0.00923119	-0.0138942	0.00967328	-0.00861016	-0.00347354	0.00435771	-0.0340407	0.0290514	0.00605238	-0.00614711	0.0104732	-0.00991537	-0.00213675	0.0220728	-0.000505242
Methylacidiphilum_infernorum_V4_uid59161|hemA	15.6973	0.0216736	0.00367077	-0.0132353	-0.0261634	0.0138056	0.0111878	-0.0268507	0.00105297	-0.0457018	-0.00400714	0.0192313	-0.0373366	0.0151949	0.0122262	0.0342362	0.0193922	-0.00557197	0.00593758	-0.00364152	0.00489924
Pasteurella_multocida_Pm70_uid57627|purM	8.10019	0.0153233	0.00882854	-0.0250903	0.000764088	0.0299489	-0.0112288	-0.0162286	0.00599643	-0.0364852	-0.0198912	0.00959262	-0.0225572	0.0233213	0.0118932	0.00339687	0.00889498	0.000465097	0.0144928	-0.00173581	0.000298991
Pasteurella_multocida_Pm70_uid57627|murG	13.8477	0.110827	-0.0219963	-0.0350799	-0.0299232	0.0209243	0.00619747	-0.0235614	0.00597837	-0.079456	-0.0135218	0.0100631	-0.0299779	0.0820305	0.00924144	-0.0380691	0.0313473	0.00647135	0.0112994	0.0156032	-0.0383977
Pasteurella_multocida_Pm70_uid57627|pheA	5.26035	0.00633461	-0.00946816	0.00174515	-0.0108951	-0.0134791	-0.0212311	-0.0134695	0.0198137	-0.03041	0.00545721	0.0407941	-0.0430406	0.0717826	0.00259362	0.00489799	0.0178082	0.0117822	-0.00487871	-0.027826	-0.00831116
Pasteurella_multocida_Pm70_uid57627|prsA	6.0317	0.0100658	-0.00820751	-0.0319009	0.0267906	0.00108401	0.017499	-0.0324429	-0.00820751	-0.0353852	0.0178087	-0.00774293	-0.0106852	0.00100658	-0.00720093	0.00456833	0.0483159	-0.00147116	0	0.0277971	-0.0116918
Pasteurella_multocida_Pm70_uid57627|argS	6.14497	0.021183	-0.00363462	-0.0351183	0.0164216	0.00242206	-0.00247411	-0.0169789	0.00319675	-0.0120154	-0.00407248	0.0104139	-0.034411	0.0482911	-0.00217097	0.00418884	-0.00254148	0.0113233	0.00513194	-0.0101812	0.00102578
Pasteurella_multocida_Pm70_uid57627|pheT	9.2199	0.0603705	0.00606907	-0.0396681	0.00387349	0.00655269	-0.014227	-0.0383534	0.000817383	-0.0437118	-0.00530845	0.0125082	-0.0180574	0.0328111	-0.00919556	0.0107668	0.0221443	-0.00580569	0.00699998	0.0203324	-0.00891856
Pasteurella_multocida_Pm70_uid57627|hemA	8.73843	0.0257799	0.00534417	-0.0274206	-0.0288923	0.00451179	-0.014235	-0.0326562	0.00963882	-0.0661688	-0.00282288	0.0435858	-0.0311965	0.0669288	0.00272637	0.0190726	0.0114242	0.0134147	0.00398099	0.00535624	-0.00837214
Pasteurella_multocida_Pm70_uid57627|modF	3.39015	0.0184195	-0.000386006	-0.020746	-0.0273327	-0.0326105	0.0120258	-0.0171737	0.0254027	-0.0181072	-0.00584623	0.036839	0.00506369	0.0626592	-0.00265993	0.00429168	-0.0162193	0.00185634	0.0148682	-0.0231919	-0.0171527
Pasteurella_multocida_Pm70_uid57627|nrdD	5.35283	0.0133987	0.00945338	-0.0141855	-0.00254822	0.000983589	0.00171217	0.0108013	-0.00301452	-0.0154842	-0.00924755	-0.0167829	-0.00665197	0.0203093	0.0174004	-0.0133531	0.0130362	-0.00145717	-0.00607821	-0.00234058	0.00404911
Pasteurella_multocida_Pm70_uid57627|dcd	8.35625	0.0585027	-0.0191172	0.00390351	-0.00125113	0.00905815	-0.0124612	0.00935842	0.00120108	-0.0558503	0.00605545	0.0405865	-0.0118607	-0.013362	0.0224202	0.00510459	0.0478931	-0.0273246	0.00545491	-0.0358322	-0.0324792
Pasteurella_multocida_Pm70_uid57627|glnA	2.19678	0.00304021	-0.00510185	-0.0132914	0.007382	-0.014422	-0.0118093	0.0117428	0.00100707	-0.0167876	0.0158376	0.0111253	0.0123603	-0.00111158	0.00339173	0.00326822	0.00450331	0.00824656	-0.00921563	-0.0255092	0.0153435
Pasteurella_multocida_Pm70_uid57627|ffh	10.2955	0.0272586	0	-0.0167977	0.00339641	0.00515284	0.0171179	-0.0364483	0.00865599	-0.0438525	0.0210577	-0.0128578	0.00378457	-0.00299854	-0.000582242	-0.0074818	0.0344687	-0.00744299	0	0.0232023	-0.0156332
Pasteurella_multocida_Pm70_uid57627|hisA	11.449	0.0424436	0.0119149	-0.0471096	-0.0019997	0.00898199	0.0198137	-0.0359946	-0.000266627	-0.0682564	-0.0127148	0.0013498	-0.0179306	0.079788	-0.0172641	0.006699	0.0116483	0.0191471	0.00374944	-0.0155143	0.0115149
Pasteurella_multocida_Pm70_uid57627|gcp	10.3026	0.0658796	-0.00950182	-0.0183333	-0.00482539	0.0130025	0.00870379	-0.0471526	-0.00987955	-0.0537177	-0.00331446	0.0235524	-0.0241216	0.0484508	0.0232811	-0.0215839	0.0101509	0.00721415	0.000356451	0.00100551	-0.00916665
Pasteurella_multocida_Pm70_uid57627|alaS	6.60536	0.0489785	-0.00427651	-0.025382	-0.00667002	0.0151846	0.00867872	-0.0235093	0.0106438	-0.0290454	-0.00631086	0.0130578	-0.00703944	0.0143303	-0.00512052	0.00781162	0.00881725	-0.00790654	-0.00203436	0.00276036	-0.0129681
Pasteurella_multocida_Pm70_uid57627|speE	8.23157	0.0481157	0.00570157	-0.0260047	-0.0134891	0.0216938	-0.00118203	-0.0538173	0.0182172	-0.0423446	-0.00166875	0.0377555	0.0138367	0.00542345	-0.00716173	-0.0178	0.0206508	0.00180782	-0.000834376	0.00778751	-0.0166875
Pasteurella_multocida_Pm70_uid57627|ftsY	8.53193	0.0270588	0.00217865	0.0048366	0.0119826	-0.0146405	0.0213943	-0.0300218	0.0108061	-0.0614815	-0.0270153	-0.0217865	-0.000653595	0.0208715	0.00152505	0.0142048	-0.00488017	0.0273203	0.00653595	0.0230501	-0.0112854
Pasteurella_multocida_Pm70_uid57627|sun	9.19135	0.0609835	0.00423859	-0.0273205	-0.0144358	-0.00191965	-0.0255237	-0.0453806	0.0257233	-0.0307451	-0.0206708	0.040758	-0.0349837	0.061352	0.0138983	-0.0211622	0.00480681	-0.0124393	0.0179372	0.0177683	-0.0128847
Pasteurella_multocida_Pm70_uid57627|ileS	8.18294	0.048331	0.00234308	-0.0290094	0.00698566	0.0132263	0.00208781	-0.0172836	0.00447448	-0.0320166	-0.00389753	0.00675945	-0.0160757	0.0235761	0.00284324	-0.0087767	0.0184084	-0.00812711	-0.000361113	-0.00451391	-0.00897386
Pasteurella_multocida_Pm70_uid57627|pyrE	8.18288	0.0325335	0.00394039	-0.0225309	-0.00118717	0.0192473	0.0546097	-0.00558222	0.00934579	-0.0682496	0.0179591	-0.0139177	-0.0483708	0.0538772	0.0118212	-0.00265218	0.0204345	-0.0274817	0	-0.0527658	0.0189694
Pasteurella_multocida_Pm70_uid57627|oppF	10.575	0.0392013	0.017324	-0.0191742	-0.00579069	-0.010356	0.00759278	-0.0197869	0.0176244	-0.033771	-0.000312361	-0.00702812	-0.0386247	0.0279563	0.0270433	0.0133594	0.0118457	-0.0070041	0.00212646	-0.0118817	-0.010344
Photorhabdus_asymbiotica_ATCC_43949_uid59243|glnA	8.70421	-0.00697027	-0.00716628	-0.0213459	0.0163309	0.00938453	-0.0114976	-0.000616711	0.0139358	-0.0270827	0.0245967	0.00736229	-0.00433132	-0.0031218	0.00375764	0.00791207	0.0154082	0.0149684	-0.00918852	-0.0294348	0.00709935
Photorhabdus_asymbiotica_ATCC_43949_uid59243|ileS	11.5793	0.0531977	0.00760483	-0.0283086	0.00340607	0.0214149	-0.00133146	-0.0250749	0.00753877	-0.0430497	0.000268357	0.0170138	-0.0280444	0.0190781	0.0047716	0.00163801	0.0213468	-0.0126365	-0.000498525	-0.00489752	-0.0134375
Photorhabdus_asymbiotica_ATCC_43949_uid59243|speE	7.58615	0.0307942	0.0101898	-0.0367632	-0.0014985	0.0197053	0.0235764	0.00214785	0.016958	-0.0648851	0.0137612	-0.0230769	0.00609391	0.0307942	-0.01496	-0.0151848	0.0275974	-0.00841658	-0.00014985	-0.0156344	-0.00104895
Photorhabdus_asymbiotica_ATCC_43949_uid59243|cysG	20.0238	0.0715571	-0.00215942	-0.039928	-0.0171483	0.047433	-0.0455594	-0.0378004	0.0219646	-0.0981581	0.00353551	0.0395469	-0.0455277	0.0666455	0.0276278	-0.0420239	0.0190537	0.00844713	0.012766	0.0218376	-0.0121097
Photorhabdus_asymbiotica_ATCC_43949_uid59243|purM	11.7253	0.0295228	0.00587972	-0.0252662	-0.0138795	0.0238419	-0.0112874	-0.0367027	0.00881958	-0.0482386	-0.0141527	0.0180118	-0.0197592	0.0261109	0.0117843	0.00615301	0.0117098	0.0176889	0.0144509	-0.00491081	0.000223595
Photorhabdus_asymbiotica_ATCC_43949_uid59243|pheS	10.8703	0.0445688	-0.0069419	-0.0444893	0.0142202	0.0132783	0.00716208	-0.0351865	0.0176391	-0.0711865	0.00552294	0.00491743	-0.00507034	0.0237554	0.0119878	-0.00930275	0.0283364	0.000813456	-0.00788379	0.0113945	-0.00353517
Photorhabdus_asymbiotica_ATCC_43949_uid59243|pheT	10.6856	0.0352133	0.00858479	-0.0258316	0.00764707	0.00781055	-0.0192585	-0.0295484	0.00333311	-0.0411961	-0.00153486	0.00999251	-0.0218309	0.0240061	-0.00290625	0.00196172	0.0309493	-0.00957927	0.00699998	0.0228481	-0.0076607
Photorhabdus_asymbiotica_ATCC_43949_uid59243|oppF	11.5603	0.0323921	0.0170685	-0.0199409	0.00567366	-0.00207718	0.00426118	-0.0297452	0.0142198	-0.0406533	0.0113711	-0.0114185	-0.0480718	0.0123206	0.0383981	0.00962623	0.0293891	-0.0104452	0.00805944	-0.00982801	-0.0105995
Photorhabdus_asymbiotica_ATCC_43949_uid59243|argS	12.5127	0.028287	-0.00188948	-0.0436604	0.0130607	0.012938	-0.0128276	-0.0151465	0.00843517	-0.0188334	-0.00055212	0.0105884	-0.0412802	0.0310353	0.00480958	-0.00960076	0.0079444	0.0218333	0.00514699	-0.00832474	0.00803642
Photorhabdus_asymbiotica_ATCC_43949_uid59243|hemA	13.182	0.0243206	-0.00594615	-0.0132885	-0.0275866	0.00120917	-0.0252182	-0.0423336	0.0128646	-0.0742334	-0.00213164	0.0524183	-0.0156819	0.053104	0.0128646	0.0238345	0.0273997	0.000972326	0.00190726	0.00550985	-0.00998504
Photorhabdus_asymbiotica_ATCC_43949_uid59243|dcd	13.4928	0.0444032	-0.0193699	-0.00918523	0.0202265	0.0202265	-0.01423	0.0104702	0.00509233	-0.0627737	0.00504474	0.0448315	-0.0288407	-0.00947078	0.0345993	-0.0237007	0.0590615	-0.0337426	0.00985151	-0.0138492	-0.0386446
Photorhabdus_asymbiotica_ATCC_43949_uid59243|modF	7.91993	-0.00169165	0.00514915	-0.041119	0.00710049	0.004103	0.0145868	-0.00639563	0.0180146	-0.0712386	-0.0114595	0.0120641	-0.00480414	0.0506012	-0.00427365	0.0381809	0.0128803	-0.00276748	0.0106136	-0.0205521	-0.00899247
Photorhabdus_asymbiotica_ATCC_43949_uid59243|pheA	7.36271	0.0144892	-0.00420624	-0.0264102	-0.00288816	-0.0106804	-0.0236674	0.00249079	0.0303644	-0.0353363	0.0107191	0.0258674	-0.0350068	0.0540706	0.00797635	0.00783097	0.0206338	0.0146346	-0.00226788	-0.0275441	-0.02107
Photorhabdus_asymbiotica_ATCC_43949_uid59243|ffh	10.5663	0.0150258	0.00220751	-0.0248565	0.0106696	-0.000529801	0.0131126	-0.0381015	0.00880059	-0.0406328	0.0173657	-0.0161884	0.00198675	-0.00251656	0.00198675	-0.00476821	0.0307285	-0.00254599	0	0.0438411	-0.015585
Photorhabdus_asymbiotica_ATCC_43949_uid59243|alaS	6.50841	0.0384903	-0.00544157	-0.0346868	0.00917849	0.0149886	0.00858468	-0.0145074	0.00943956	-0.0303254	-0.00864099	0.00942421	0.00314311	0.014231	-0.00517538	0.0133966	0.0155569	-0.0114514	-0.00319942	-0.00998219	-0.0130229
Photorhabdus_asymbiotica_ATCC_43949_uid59243|ftsY	14.6621	0.10762	0	0.0408637	-0.00899685	-0.0192713	0.014413	-0.0380837	0.0077013	-0.0687539	-0.0282501	-0.00989654	-0.0232119	0.0444265	-0.0130904	-0.022969	0.0421592	-0.0126496	0.00404858	-0.00213225	-0.0139271
Photorhabdus_asymbiotica_ATCC_43949_uid59243|gldA	11.8422	0.0319688	0.0161317	-0.00433559	0.000490822	0.0166225	0.011567	-0.062907	0.00636432	-0.0381696	0.00389385	0.00307582	-0.0121233	0.00389385	0.00232322	-0.0384313	-0.00209417	0.00894931	-0.000261772	0.0507182	0.00232322
Photorhabdus_asymbiotica_ATCC_43949_uid59243|lysC	9.46618	0.031758	0.00456678	-0.030962	0.00754148	-0.0222893	-0.00364505	-0.0306687	0.0133652	-0.0377912	-0.00821183	0.0559745	-0.00988772	0.0263952	0.00481817	-0.00946874	0.0159628	0.0230434	0.00222055	-0.0307944	-0.00192727
Photorhabdus_asymbiotica_ATCC_43949_uid59243|nrdD	7.28094	0.013505	0.0080804	-0.022512	-0.00106887	0.00388516	-0.00103969	-0.00313731	0.00124033	-0.0195973	-0.0106304	-0.00263753	0.00184591	0.0147563	0.0118415	-0.00907267	0.0173245	-0.00419524	-0.00607033	0.00897417	-0.00149205
Photorhabdus_asymbiotica_ATCC_43949_uid59243|rfaG	12.8369	0.0599116	0.0126686	0.00467486	-0.00517681	-0.0202053	-0.0300569	-0.0242808	0.00937968	-0.0353911	0.0156428	-0.00660773	-0.056353	0.0447408	0.00343123	-0.0310009	0.0606982	0.00640545	0.0131405	-0.0109679	-0.0106533
Photorhabdus_asymbiotica_ATCC_43949_uid59243|pyrE	10.0861	0.0189316	0.0133739	-0.0221799	0.0130948	0.0290318	0.0361375	-0.000558305	0.028169	-0.0632915	0.0180688	-0.00411115	-0.0482172	0.0213425	0.0119528	-0.0164954	0.0253267	-0.0226113	0	-0.0477858	0.00982109
Prochlorococcus_marinus_CCMP1375_uid57995|ftsY	0.582382	0.0260428	0.00232019	0.00150039	0.01405	-0.0196752	0.0194432	-0.040263	-0.00444444	-0.0520289	-0.0351637	0.0118587	0.0269915	-0.00258314	-0.0101315	0.0348337	0.0127765	-6.70276e-05	0.0116009	0.0206187	-0.0176798
Prochlorococcus_marinus_CCMP1375_uid57995|alaS	2.94886	0.0325112	-0.00112108	-0.0213004	-0.00112108	0.0112108	0.0112108	-0.00672646	0.00224215	-0.0426009	-0.00896861	0.0190583	-0.00560538	0.0123318	-0.00224215	0.0179372	0.0179372	-0.014574	-0.00672646	0.00336323	-0.0168161
Prochlorococcus_marinus_CCMP1375_uid57995|gatB	-0.983413	0.0205636	-0.00679529	-0.00458509	-0.00472377	0.0131702	0.0051008	-0.0137509	-0.000797407	-0.00661761	-0.0201865	0.029231	-0.0188517	0.00247023	-0.00229254	0.0387566	-0.000160348	-0.0167195	0.00589821	-0.02218	0.00247023
Prochlorococcus_marinus_CCMP1375_uid57995|argS	2.40061	-0.00101964	0.00443308	-0.0435309	0.00702319	0.0115647	0.00590686	0.00384708	-0.00252565	-0.0151539	-0.0235102	0.0276386	-0.0114035	0.0357254	0.013516	0.00172283	0.018957	-0.00426021	0.00309993	-0.0231206	-0.0089101
Prochlorococcus_marinus_CCMP1375_uid57995|ileS	0.844498	0.0181397	-0.000253507	-0.0295675	-0.000878291	0.0107271	-0.00153302	-0.00925798	0.00245921	-0.0253097	-0.0128909	0.0316324	-0.00326664	0.00852142	0.0116883	0.0203394	0.0165238	-0.0170718	0.00278358	-0.0144828	-0.00830284
Prochlorococcus_marinus_CCMP1375_uid57995|pyrE	7.80452	0.0234797	0.00501126	-0.045214	-0.00678491	0.0236768	0.0100225	-0.0392173	0.00520833	-0.0461993	0.0102196	0.048339	-0.00816441	-0.000591216	0.0254505	0.0240709	0.00962838	-0.0179899	0.00520833	-0.0249718	-0.00118243
Prochlorococcus_marinus_CCMP1375_uid57995|rfaG	2.7686	0.0339758	0.0108454	-0.0100149	-0.00821539	-0.0441153	-0.0152888	-0.0104994	0.00449182	-0.0386061	0.0140222	-0.000373741	-0.0305153	0.0185763	0.0153372	0.00220784	0.0308613	0.00868602	0.0192961	-0.00929508	0.00862373
Prochlorococcus_marinus_CCMP1375_uid57995|rfaG	2.7686	0.0339758	0.0108454	-0.0100149	-0.00821539	-0.0441153	-0.0152888	-0.0104994	0.00449182	-0.0386061	0.0140222	-0.000373741	-0.0305153	0.0185763	0.0153372	0.00220784	0.0308613	0.00868602	0.0192961	-0.00929508	0.00862373
Prochlorococcus_marinus_CCMP1375_uid57995|hemA	4.04521	-0.00464854	-0.00164736	-0.018726	-0.0177196	0.0179412	-0.0121365	-0.0331149	0.0003115	-0.0504511	-0.00983023	0.0610541	-0.0154312	0.0320186	0.0117531	0.0460421	0.0179412	-0.000694885	-0.000658943	0.00254592	-0.0245486
Prochlorococcus_marinus_CCMP1375_uid57995|hisA	3.34009	0.0241831	0.00756937	-0.0287863	0.0119781	-0.00949818	0.00732624	0.0085743	-0.000486255	-0.0658876	-0.0129344	0.0341999	0.00440871	0.0263712	-0.00218815	0.00538122	0.0266144	0.0217356	-0.000486255	-0.0492901	-0.00878501
Prochlorococcus_marinus_CCMP1375_uid57995|modF	-2.93875	-0.00511159	-0.00395257	-0.0153348	-0.0175488	-0.00347707	0.0103123	0.0327647	-0.00829148	-0.0240126	-0.0163898	0.00153051	0.0414425	-0.00867782	-0.00887099	0.0164789	0.0212042	0.0241909	0.011085	-0.0495557	0.00221403
Prochlorococcus_marinus_CCMP1375_uid57995|glnA	0.210027	-0.0183164	-0.0114667	-0.024019	0.00935731	0.00871738	-0.00979816	-0.00319969	0.00730477	-0.0147944	0.0115331	0.0109595	0.00166858	0.0136473	0.00538496	0.017942	0.00230852	0.00391073	0.00134624	-0.0298495	0.0173636
Prochlorococcus_marinus_CCMP1375_uid57995|gldA	1.36803	0.0156769	0.0341413	-0.0277879	-0.00648835	0.00908528	0.0025731	-0.0435204	-0.00504296	-0.0265014	-0.00470147	0.0507632	0.0214028	0.0244762	-0.00940294	-0.0241903	0.0158357	-0.00879938	0.00761607	-0.00512238	-0.020013
Prochlorococcus_marinus_CCMP1375_uid57995|prsA	1.21669	0.0121046	-0.0025573	-0.0303573	0.0115292	-0.00724568	0.0101013	-0.0293557	-0.0056154	-0.0307835	0.0135857	-0.00759731	-0.0181994	0.012307	-0.00554082	0.035994	0.0271713	-0.00333514	0.0030581	0.0116037	0.00313269
Prochlorococcus_marinus_CCMP1375_uid57995|ffh	8.57278	0.0221535	0	-0.0165636	0.00836197	0.0354639	0.0150515	-0.0371821	0.00586483	-0.0489576	0.0112257	-0.0245132	-0.0106529	0.00694158	0.0120275	-0.0038488	0.0269416	-0.0201833	0	0.0316838	-0.0138144
Prochlorococcus_marinus_CCMP1375_uid57995|pheA	3.53755	0.0258529	0.00261194	-0.0105011	-0.0129531	0.00133262	-0.0165245	-0.0143923	0.0102345	-0.0285181	0.00682303	0.0284648	-0.028838	0.0134861	0.0164179	0.0224414	0.00959488	0.0234009	-0.000319829	-0.0213753	-0.0272388
Prochlorococcus_marinus_CCMP1375_uid57995|purM	5.98073	-0.0107637	0.0117271	-0.0221918	-0.0166272	0.0386446	0.00906109	-0.0307213	-0.00559777	-0.0480794	-0.0140941	0.0153897	-0.00226735	0.0204227	0.0234874	0.0236867	0.0175906	-0.005332	0.0115942	-0.0162286	0.000298991
Prochlorococcus_marinus_CCMP1375_uid57995|lysC	3.74105	0.0333333	0.00299145	-0.0277778	-0.0119658	0.0017094	-0.0141026	-0.0153846	-0.00128205	-0.0111111	-0.0034188	0.0205128	-0.0017094	0.0213675	0.0106838	0.00769231	0.00641026	0.0111111	0.00128205	-0.0226496	-0.00769231
Prochlorococcus_marinus_CCMP1375_uid57995|rfaG	2.7686	0.0339758	0.0108454	-0.0100149	-0.00821539	-0.0441153	-0.0152888	-0.0104994	0.00449182	-0.0386061	0.0140222	-0.000373741	-0.0305153	0.0185763	0.0153372	0.00220784	0.0308613	0.00868602	0.0192961	-0.00929508	0.00862373
Prochlorococcus_marinus_CCMP1375_uid57995|speE	-3.333	0.00966899	0.0101045	-0.0195122	-0.0087108	0.0159408	-0.00801394	0.0332753	-0.0075784	0.00121951	-0.000261324	-0.0233449	0.0198606	0.0131533	-0.0011324	0.00209059	0.0204704	-0.0399826	0.0207317	-0.0332753	-0.00470383
Prochlorococcus_marinus_CCMP1375_uid57995|rfaG	2.7686	0.0339758	0.0108454	-0.0100149	-0.00821539	-0.0441153	-0.0152888	-0.0104994	0.00449182	-0.0386061	0.0140222	-0.000373741	-0.0305153	0.0185763	0.0153372	0.00220784	0.0308613	0.00868602	0.0192961	-0.00929508	0.00862373
Salinibacter_ruber_M8_uid47323|rfaG	20.5252	0.0345218	0.000744406	-0.00810388	0.0360107	-0.0280083	-0.0139238	-0.0443514	0.00148881	-0.0437931	0.00337521	-0.0342258	-0.0621833	0.0305883	0.0172482	-0.0128072	0.0696274	0.01087	0.000186102	0.039572	0.00316373
Salinibacter_ruber_M8_uid47323|rfaG	20.5252	0.0345218	0.000744406	-0.00810388	0.0360107	-0.0280083	-0.0139238	-0.0443514	0.00148881	-0.0437931	0.00337521	-0.0342258	-0.0621833	0.0305883	0.0172482	-0.0128072	0.0696274	0.01087	0.000186102	0.039572	0.00316373
Salinibacter_ruber_M8_uid47323|rfaG	20.5252	0.0345218	0.000744406	-0.00810388	0.0360107	-0.0280083	-0.0139238	-0.0443514	0.00148881	-0.0437931	0.00337521	-0.0342258	-0.0621833	0.0305883	0.0172482	-0.0128072	0.0696274	0.01087	0.000186102	0.039572	0.00316373
Salinibacter_ruber_M8_uid47323|glnA	27.2185	0.00672646	-0.0112108	0	0.029148	-0.00672646	-0.00672646	-0.00224215	0.00896861	-0.0426009	-0.0044843	0.0112108	-0.0179372	0.0112108	0.00224215	0	0.0201794	0.0201794	-0.00672646	-0.0112108	0
Salinibacter_ruber_M8_uid47323|ileS	32.2596	0.0427556	-0.00882764	0.0226915	0.0176517	0.0153682	-0.00164768	-0.0338509	-0.000906225	-0.0681317	-0.0102479	0.00898882	-0.0302905	0.0121391	0.0132907	-0.0153933	0.0264596	0.0116233	0.00259152	0.00230138	-0.00656566
Salinibacter_ruber_M8_uid47323|lysC	37.6965	0.122017	0.00508911	-0.0402882	0.014964	-0.00976031	-0.0268611	-0.0867912	0.00397018	-0.0600313	-0.00671358	0.011405	-0.0418183	0.0155707	0.0269689	-0.0221764	0.0772399	0.0179164	0.0167907	-0.0141349	-0.00335679
Salinibacter_ruber_M8_uid47323|rfaG	20.5252	0.0345218	0.000744406	-0.00810388	0.0360107	-0.0280083	-0.0139238	-0.0443514	0.00148881	-0.0437931	0.00337521	-0.0342258	-0.0621833	0.0305883	0.0172482	-0.0128072	0.0696274	0.01087	0.000186102	0.039572	0.00316373
Salinibacter_ruber_M8_uid47323|trkA	28.5278	0.0276998	0.00554877	-0.0202794	-0.0160958	-0.0105471	0.023263	-0.0634365	0.0125067	-0.0783323	0.00798186	0.0189913	-0.0163931	0.0201473	0.0215125	-8.80757e-05	0.0583501	0.0225364	0.0121655	-0.0105471	-0.0149839
Salinibacter_ruber_M8_uid47323|trkA	28.5278	0.0276998	0.00554877	-0.0202794	-0.0160958	-0.0105471	0.023263	-0.0634365	0.0125067	-0.0783323	0.00798186	0.0189913	-0.0163931	0.0201473	0.0215125	-8.80757e-05	0.0583501	0.0225364	0.0121655	-0.0105471	-0.0149839
Salinibacter_ruber_M8_uid47323|argS	32.6917	0.0503251	-0.00349584	-0.0418873	0.0554997	0.0146247	0.00561473	-0.0386303	0.0089974	-0.0652327	-0.0175672	0.0202143	-0.0421513	0.0214403	0.0161777	-0.0298719	0.0216541	0.0252128	2.515e-05	-0.00655156	0.00560215
Salinibacter_ruber_M8_uid47323|rfaG	20.5252	0.0345218	0.000744406	-0.00810388	0.0360107	-0.0280083	-0.0139238	-0.0443514	0.00148881	-0.0437931	0.00337521	-0.0342258	-0.0621833	0.0305883	0.0172482	-0.0128072	0.0696274	0.01087	0.000186102	0.039572	0.00316373
Salinibacter_ruber_M8_uid47323|hemG	37.447	0.100302	-0.00851456	-0.00346237	0.0139237	0.024867	-0.00796299	-0.0594073	0.0283942	-0.096089	-0.0234069	0.0552682	-0.0403387	-0.00407883	0.0309528	-0.0226283	0.0524501	-0.0097104	-0.00417617	0.00968259	-0.0360652
Salinibacter_ruber_M8_uid47323|dcd	29.3543	0.014117	-0.0242718	0.0341905	-0.00364734	0.0179743	-0.0161113	0.00230911	0.013015	-0.0700604	0.00705851	0.00286014	-0.0312254	-0.00154815	0.0411441	-0.0230648	0.040593	-0.00419837	0.000551036	0.0153241	-0.0150092
Salinibacter_ruber_M8_uid47323|purM	33.5542	0.029257	0.00634284	-0.00287383	0.0231182	0.0355998	-0.00184503	-0.0617109	-0.00235518	-0.0912824	-0.0165798	0.00572216	-0.0366371	0.00337548	0.0216898	-0.00143692	0.0421552	0.0251673	0.00296736	0.0154405	0.00388562
Salinibacter_ruber_M8_uid47323|alaS	30.7577	0.0218236	-0.00624066	-0.00506353	0.0516442	0.0127055	-0.00751121	-0.0265508	0.0248505	-0.0646861	-0.0102392	-0.0159753	-0.0304185	0.00835202	0.0166854	-0.0167975	0.052429	0.0227952	-0.00816517	-0.00347534	-0.0161622
Salinibacter_ruber_M8_uid47323|hemA	36.9305	0.0728394	-0.00473827	0.00805561	0.000830701	0.0275388	-0.0168326	-0.0744242	0.0135208	-0.0953339	-0.00685875	0.0174994	-0.0555367	0.0192537	0.0260468	0.0102745	0.0400649	0.0165703	0.00311513	0.0128267	-0.0147122
Salinibacter_ruber_M8_uid47323|hisA	33.4259	0.0390813	0.00747853	-0.0447747	0.0462865	-0.0062884	0.018833	-0.0621924	0.0110811	-0.101226	0.00250893	-0.00546817	-0.0348355	0.0376661	-0.00633665	-0.00661006	0.0766992	0.017466	0.00720512	-0.00710862	0.0105343
Salinibacter_ruber_M8_uid47323|ffh	28.9815	0.0244926	0.0021692	0.00877802	0.0225356	-0.00190889	0.00819957	-0.0237599	0.0107399	-0.085664	-0.0010605	-0.043866	-0.000795372	0.00973247	-0.00296457	-0.00561099	0.0362401	0.0139648	0	0.0335936	-0.00481562
Salinibacter_ruber_M8_uid47323|gatB	31.4136	0.0561087	-0.00705136	-0.00949835	0.0211709	0.00279956	0.0082056	-0.0432945	0.00262747	-0.0685535	-0.0188582	0.0260942	-0.0219725	0.00328644	0.0060776	0.0106694	0.0436429	-0.00606081	-0.00229589	-0.00244699	-0.000650572
Salinibacter_ruber_M8_uid47323|rfaG	20.5252	0.0345218	0.000744406	-0.00810388	0.0360107	-0.0280083	-0.0139238	-0.0443514	0.00148881	-0.0437931	0.00337521	-0.0342258	-0.0621833	0.0305883	0.0172482	-0.0128072	0.0696274	0.01087	0.000186102	0.039572	0.00316373
Salinibacter_ruber_M8_uid47323|pheA	40.7324	0.10213	-0.00252051	0.0474696	0.00736384	-0.00588119	-0.0456163	-0.0593308	0.015296	-0.0688445	0.0124049	-0.0129732	-0.0829297	0.00783335	0.0657557	0.00652367	0.0599733	0.0289117	-0.00746269	-0.0158644	-0.0522388
Salinibacter_ruber_M8_uid47323|rfaG	20.5252	0.0345218	0.000744406	-0.00810388	0.0360107	-0.0280083	-0.0139238	-0.0443514	0.00148881	-0.0437931	0.00337521	-0.0342258	-0.0621833	0.0305883	0.0172482	-0.0128072	0.0696274	0.01087	0.000186102	0.039572	0.00316373
Salinibacter_ruber_M8_uid47323|ftsY	32.1674	0.0374074	0	-0.00950617	0.0462963	0.015679	0.0139506	-0.0341975	0.0171605	-0.0769136	-0.0166667	-0.0246914	-0.0148148	-0.00345679	-0.00555556	-0.0255556	0.022716	0.00444444	0.00617284	0.0551852	-0.00765432
Salinibacter_ruber_M8_uid47323|trkA	28.5278	0.0276998	0.00554877	-0.0202794	-0.0160958	-0.0105471	0.023263	-0.0634365	0.0125067	-0.0783323	0.00798186	0.0189913	-0.0163931	0.0201473	0.0215125	-8.80757e-05	0.0583501	0.0225364	0.0121655	-0.0105471	-0.0149839
Salinibacter_ruber_M8_uid47323|hmgA	28.5225	-0.000333791	-0.00548371	-0.0176909	0.0498493	-0.0104143	0.0133898	-0.0513466	0.0266556	-0.0614271	-0.00209812	0.00226978	-0.0101091	0.00467308	0.0168517	0.0166228	0.020161	0.0102045	0.00533112	-0.00983253	0.00272755
Salinibacter_ruber_M8_uid47323|proS	33.7495	0.0320319	0.00368234	0.00545697	0.0208962	0.00252884	-0.00905058	-0.0438332	0.00465839	-0.0687223	0.0129547	-0.0284383	-0.00199645	0.0398846	0.00550133	-0.00443656	0.0299911	0.00239574	0.0136202	0.000221828	-0.0173469
Salmonella_enterica_serovar_Choleraesuis_SC_B67_uid58017|ileS	20.1355	0.0492603	0.00303894	-0.0328254	0.00834594	0.0283196	1.82093e-05	-0.018792	0.00278198	-0.0337136	0.00189377	0.00270105	-0.0286595	0.0162225	0.00919571	-0.0110349	0.0192614	-0.000890234	-0.00205361	-0.00318056	-0.00988969
Salmonella_enterica_serovar_Choleraesuis_SC_B67_uid58017|speE	16.4131	0.0657592	0.00669331	-0.0367632	0.001998	0.0127123	0.0200799	-0.00484515	0.0379371	-0.0718781	0.0172577	-0.0265734	-0.000899101	0.0168082	-0.01496	-0.0186813	0.0206044	-0.00841658	-0.00014985	-0.0121379	-0.00454545
Salmonella_enterica_serovar_Choleraesuis_SC_B67_uid58017|modF	20.4538	0.0186749	0.00514915	-0.0513023	0.00913715	0.00206634	0.0125501	-0.0369455	0.0180146	-0.0793852	-0.0134961	0.00391751	-0.0129508	0.0465278	0.00998297	0.0198509	0.0352836	0.0196358	0.0106136	-0.00833213	-0.00899247
Salmonella_enterica_serovar_Choleraesuis_SC_B67_uid58017|pheS	20.5248	0.0568012	-0.0069419	-0.0567217	0.0111621	0.0163364	0.00716208	-0.0229541	0.0176391	-0.083419	0.0116391	-0.00119878	-0.00201223	0.0237554	0.0119878	-0.0123609	0.0313945	0.0191621	-0.00788379	-0.00695413	-0.00659327
Salmonella_enterica_serovar_Choleraesuis_SC_B67_uid58017|pheT	20.4008	0.0515655	0.00732693	-0.0333787	0.0114207	0.0178734	-0.0242899	-0.0295484	0.00207524	-0.0449697	-0.00530845	0.0112504	-0.0155416	0.0139432	-0.00416411	-0.00558545	0.033465	-0.00706355	0.00825784	0.0178167	-0.00514497
Salmonella_enterica_serovar_Choleraesuis_SC_B67_uid58017|oppF	21.7781	0.0411943	0.0170055	-0.0201297	0.00250882	-0.00228397	0.00418925	-0.029952	0.0111358	-0.0468391	-0.000721876	0.00321886	-0.0511467	0.0211948	0.0411943	0.000473362	0.0292182	-0.0105441	0.00802348	-0.00707676	-0.0106625
Salmonella_enterica_serovar_Choleraesuis_SC_B67_uid58017|hemA	24.615	0.0415341	-0.00591197	-0.0224705	-0.00107718	0.00618753	-0.0251384	-0.0420602	0.00582429	-0.0764548	-0.00442145	0.0506526	-0.03457	0.048661	0.00821664	0.0265913	0.030111	0.00596207	0.00433378	0.00108971	-0.0170595
Salmonella_enterica_serovar_Choleraesuis_SC_B67_uid58017|prsA	17.6494	-0.000155088	-0.00903649	-0.0286603	0.0214022	0.00604845	0.0181867	-0.0378312	-0.00606913	-0.0529162	0.0157363	0.00191276	0.00463198	0.00231599	0.00218158	0.000630693	0.0522441	-0.00478706	0	0.0266856	-0.0125208
Salmonella_enterica_serovar_Choleraesuis_SC_B67_uid58017|argS	20.2165	0.0471796	-0.00190151	-0.0489831	0.0216209	0.0128207	-0.00594032	-0.0273775	0.0101292	-0.0310795	0.00459303	0.0104139	-0.0465427	0.0378925	0.00996074	-0.0166084	0.0113233	0.00959024	0.00513194	-0.0049819	0.00275888
Salmonella_enterica_serovar_Choleraesuis_SC_B67_uid58017|hisA	24.5168	0.0440173	0.00809552	-0.0423067	-0.00101617	0.01885	0.00802778	-0.0631891	0.00802778	-0.083665	-0.0166653	0.0190533	-0.0295199	0.0405453	-0.000609704	-0.000677449	0.0446947	0.0117707	0.00394614	0.0227284	0.00789229
Salmonella_enterica_serovar_Choleraesuis_SC_B67_uid58017|dcd	26.4389	0.064138	-0.0139092	-0.0112933	0.0197948	0.0249761	-0.0122743	-0.021329	0.00130791	-0.0711806	0.00616228	0.0463555	-0.037527	-0.0184365	0.0434126	-0.0203481	0.0689924	-0.021983	0.0106897	-0.0200211	-0.037527
Salmonella_enterica_serovar_Choleraesuis_SC_B67_uid58017|purM	21.2987	0.0182218	0.00882854	-0.0192932	0.000764088	0.0270504	-0.0112288	-0.0336199	0.00309788	-0.0538765	-0.0140941	0.0182883	-0.0196587	0.0117271	0.0118932	0.0120925	0.0204892	0.0062622	0.0144928	-0.00173581	0.000298991
Salmonella_enterica_serovar_Choleraesuis_SC_B67_uid58017|pheA	20.3484	0.0427848	-0.0120254	-0.0135914	-0.010788	-0.00560668	-0.0263321	-0.0236447	0.0354381	-0.0458201	0.0132627	0.0411221	-0.0506921	0.0435194	0.00527801	0.00765602	0.0256941	0.0196814	-0.00228134	-0.0173227	-0.0263321
Salmonella_enterica_serovar_Choleraesuis_SC_B67_uid58017|ffh	20.7719	0.0238558	0.00220751	-0.0248565	0.0106696	0.00388521	0.0131126	-0.0425166	0.00880059	-0.0362178	0.0151582	-0.0117734	-0.000220751	-0.00472406	0.00640177	-0.0158057	0.032936	-0.00916851	0	0.0438411	-0.015585
Salmonella_enterica_serovar_Choleraesuis_SC_B67_uid58017|alaS	19.1272	0.0601798	-0.00772468	-0.0278375	0.00461228	0.0252626	0.00858468	-0.0361969	0.00715646	-0.0383162	-0.00293323	0.0117073	-0.00941397	0.014231	-0.00403383	0.00426418	0.0235477	-0.0125929	-0.00319942	-0.000849766	-0.0164476
Salmonella_enterica_serovar_Choleraesuis_SC_B67_uid58017|hypF	28.0259	0.0846747	0.0114193	-0.0426207	-0.00081194	0.0167882	-0.00414489	-0.0727129	0.0126294	-0.0786834	0.00324602	0.0166213	-0.0495839	0.0380986	0.0359827	-0.0258465	0.0386202	-0.00263054	0.0161293	0.0216285	-0.0188033
Salmonella_enterica_serovar_Choleraesuis_SC_B67_uid58017|hypB	23.9068	0.0502771	0.00972906	0.00646552	-0.0440579	0.00544951	-0.00812808	-0.0643473	-0.0136084	-0.0781404	0.00526478	0.0275554	-0.0197044	0.0210899	0.0407635	0.0269704	0.0383313	0.00951355	0.00689655	-0.0251847	0.00486453
Salmonella_enterica_serovar_Choleraesuis_SC_B67_uid58017|sun	21.5253	0.0532379	0.000287384	-0.0320034	0.00348054	0.0277405	-0.0223042	-0.0551697	0.0198854	-0.04009	-0.0110802	0.0184724	-0.0427084	0.0644618	0.0299278	-0.0268225	0.0230785	-0.0172111	0.020979	-0.00664974	-0.00751189
Salmonella_enterica_serovar_Choleraesuis_SC_B67_uid58017|pyrE	21.7683	0.037711	0.00398427	-0.0127903	0.0130948	0.0290318	0.0455272	-0.00525314	0.0234742	-0.0679863	0.0133739	0.000583682	-0.0623017	0.0166476	0.0119528	-0.0118005	0.0394112	-0.0226113	0	-0.0571755	0.00512625
Salmonella_enterica_serovar_Choleraesuis_SC_B67_uid58017|glnA	16.3638	0.00369071	-0.00716628	-0.0128171	0.00780212	0.00938453	-0.0114976	0.00151548	0.0139358	-0.0206861	0.016068	0.000965703	-0.00433132	-0.000989607	0.00375764	-0.00274891	0.0154082	0.00217522	-0.00918852	-0.0123773	0.00709935
Salmonella_enterica_serovar_Choleraesuis_SC_B67_uid58017|gldA	21.8395	0.0690651	0.0159762	-0.0157977	-0.0108158	0.0214206	0.00856823	-0.0634179	0.00885221	-0.060294	0.00371614	0.0158707	-0.03136	0.0091362	0.0128523	-0.0497379	0.0221184	0.0301186	0.00242604	0.0255505	-0.0142479
Salmonella_enterica_serovar_Choleraesuis_SC_B67_uid58017|nrdD	19.2024	0.021932	0.0094849	-0.0168941	0.0045491	0.0137166	0.000364804	-0.00454181	-0.00578214	-0.0280242	-0.00782139	-0.012469	-0.00658106	0.0133518	0.0174595	-0.0146906	0.024347	-0.00138625	-0.00326135	0.0019517	-0.00570553
Salmonella_enterica_serovar_Enteritidis_P125109_uid59247|ileS	20.4079	0.0503905	0.00322509	-0.0330603	0.00926343	0.0282841	-0.000549126	-0.0191067	0.00308781	-0.0349945	0.0022129	0.00258581	-0.0293332	0.0166746	0.00870816	-0.0104498	0.0198997	-0.00128471	-0.00174778	-0.0033091	-0.0104969
Salmonella_enterica_serovar_Enteritidis_P125109_uid59247|speE	16.2969	0.0657592	0.00669331	-0.0367632	0.001998	0.0127123	0.0200799	-0.00484515	0.0379371	-0.0718781	0.0172577	-0.0265734	-0.000899101	0.0168082	-0.01496	-0.0186813	0.0206044	-0.00841658	-0.00014985	-0.0121379	-0.00454545
Salmonella_enterica_serovar_Enteritidis_P125109_uid59247|modF	21.1313	0.0207116	0.00311249	-0.0492657	0.00710049	0.00206634	0.0125501	-0.0369455	0.0180146	-0.0793852	-0.0134961	0.00391751	-0.0129508	0.0465278	0.00998297	0.0198509	0.0373202	0.0196358	0.0106136	-0.0103688	-0.00899247
Salmonella_enterica_serovar_Enteritidis_P125109_uid59247|argS	20.6202	0.0437134	-0.00190151	-0.0489831	0.0216209	0.0128207	-0.00594032	-0.0273775	0.0101292	-0.0310795	0.00459303	0.0104139	-0.0465427	0.0378925	0.00822764	-0.0148753	0.0113233	0.0130564	0.00513194	-0.0049819	0.00275888
Salmonella_enterica_serovar_Enteritidis_P125109_uid59247|prsA	17.9515	0.00689121	-0.00820751	-0.0287263	0.0267906	0.00425861	0.017499	-0.0356175	-0.00820751	-0.0512582	0.0146341	-0.00456833	0.00518777	0.00100658	-0.00402633	-0.00178087	0.0514905	-0.00464576	0	0.0309717	-0.0116918
Salmonella_enterica_serovar_Enteritidis_P125109_uid59247|hemA	25.2514	0.0439265	-0.00591197	-0.0224705	-0.00107718	0.00618753	-0.0251384	-0.0420602	0.00582429	-0.0764548	-0.00442145	0.0506526	-0.03457	0.048661	0.00821664	0.0265913	0.030111	0.00596207	0.00433378	-0.00130264	-0.0170595
Salmonella_enterica_serovar_Enteritidis_P125109_uid59247|oppF	21.7781	0.0411943	0.0170055	-0.0201297	0.00250882	-0.00228397	0.00418925	-0.029952	0.0111358	-0.0468391	-0.000721876	0.00321886	-0.0511467	0.0211948	0.0411943	-0.00252065	0.0322123	-0.0105441	0.00802348	-0.00707676	-0.0106625
Salmonella_enterica_serovar_Enteritidis_P125109_uid59247|pheS	20.7281	0.0568012	-0.0069419	-0.0567217	0.0111621	0.0163364	0.00716208	-0.0229541	0.0176391	-0.083419	0.00858104	-0.00119878	-0.00201223	0.0237554	0.0119878	-0.0123609	0.0313945	0.0222202	-0.00788379	-0.00695413	-0.00659327
Salmonella_enterica_serovar_Enteritidis_P125109_uid59247|hisA	24.3813	0.0440173	0.00809552	-0.0463883	0.00714709	0.01885	0.00802778	-0.0591075	0.00802778	-0.083665	-0.0166653	0.0190533	-0.0336015	0.0405453	-0.000609704	-0.000677449	0.0446947	0.0117707	0.00394614	0.0186468	0.00789229
Salmonella_enterica_serovar_Enteritidis_P125109_uid59247|dcd	26.9544	0.064138	-0.0139092	-0.0112933	0.0197948	0.0249761	-0.0122743	-0.021329	0.00130791	-0.0711806	0.00616228	0.0463555	-0.037527	-0.0184365	0.0434126	-0.0203481	0.0689924	-0.021983	0.0106897	-0.0200211	-0.037527
Salmonella_enterica_serovar_Enteritidis_P125109_uid59247|purM	21.6505	0.0197953	0.00853868	-0.0202456	-0.000188293	0.028334	-0.00866148	-0.0374294	0.00280802	-0.0545804	-0.014384	0.0169218	-0.0172984	0.014253	0.0113549	0.00844863	0.0199509	0.00559967	0.0142857	0.00257061	-7.36799e-05
Salmonella_enterica_serovar_Enteritidis_P125109_uid59247|pheA	20.1762	0.0453755	-0.0120254	-0.0135914	-0.010788	-0.00560668	-0.0263321	-0.0236447	0.0354381	-0.0458201	0.0132627	0.0411221	-0.0506921	0.0435194	0.00527801	0.00765602	0.0256941	0.0170907	-0.00228134	-0.0173227	-0.0263321
Salmonella_enterica_serovar_Enteritidis_P125109_uid59247|ffh	20.6251	0.0238558	0.00220751	-0.0248565	0.0106696	0.00388521	0.0131126	-0.0425166	0.00880059	-0.0362178	0.0151582	-0.0117734	-0.000220751	-0.00472406	0.00640177	-0.0158057	0.032936	-0.00916851	0	0.0438411	-0.015585
Salmonella_enterica_serovar_Enteritidis_P125109_uid59247|alaS	19.0512	0.0613213	-0.00772468	-0.0266959	0.00347073	0.0252626	0.00858468	-0.0361969	0.00715646	-0.0383162	-0.00293323	0.0117073	-0.00941397	0.014231	-0.00403383	0.00312263	0.0235477	-0.0114514	-0.00319942	-0.00199132	-0.0164476
Salmonella_enterica_serovar_Enteritidis_P125109_uid59247|hypF	28.5614	0.0833342	0.0100788	-0.0426207	-0.00081194	0.0167882	-0.00414489	-0.0727129	0.0139699	-0.0786834	0.00324602	0.0166213	-0.0495839	0.0354176	0.0373231	-0.0258465	0.0399606	-0.00263054	0.0174697	0.0216285	-0.0188033
Salmonella_enterica_serovar_Enteritidis_P125109_uid59247|hypB	24.4796	0.0537254	0.00972906	0.00646552	-0.0440579	0.00544951	-0.00812808	-0.0643473	-0.0136084	-0.0746921	0.00526478	0.0275554	-0.0231527	0.0210899	0.0407635	0.0269704	0.0383313	0.00606527	0.00689655	-0.0251847	0.00486453
Salmonella_enterica_serovar_Enteritidis_P125109_uid59247|sun	21.5253	0.0555689	0.000287384	-0.0296724	0.00114954	0.0277405	-0.0223042	-0.0551697	0.0222164	-0.04009	-0.0110802	0.0208034	-0.0427084	0.0621308	0.0299278	-0.0291535	0.0207475	-0.0172111	0.020979	-0.00664974	-0.00751189
Salmonella_enterica_serovar_Enteritidis_P125109_uid59247|pyrE	21.7683	0.037711	0.00398427	-0.0127903	0.0130948	0.0290318	0.0455272	-0.00525314	0.0234742	-0.0679863	0.0133739	0.000583682	-0.0623017	0.0166476	0.0119528	-0.0118005	0.0394112	-0.0226113	0	-0.0571755	0.00512625
Salmonella_enterica_serovar_Enteritidis_P125109_uid59247|glnA	16.151	0.00369071	-0.00716628	-0.0128171	0.00780212	0.00938453	-0.0114976	0.00151548	0.0139358	-0.0206861	0.016068	0.000965703	-0.00433132	-0.000989607	0.00375764	-0.00274891	0.0154082	0.00217522	-0.00918852	-0.0123773	0.00709935
Salmonella_enterica_serovar_Enteritidis_P125109_uid59247|gldA	22.1097	0.0663551	0.0159762	-0.0157977	-0.0135258	0.0214206	0.00856823	-0.0661279	0.00885221	-0.060294	0.00642617	0.0158707	-0.02594	0.0091362	0.0128523	-0.0524479	0.0221184	0.0328287	0.00242604	0.0255505	-0.0142479
Salmonella_enterica_serovar_Enteritidis_P125109_uid59247|lysC	21.062	0.0428017	0.000452097	-0.0163373	0.00439724	-0.0208821	0.0037643	-0.049112	0.00731445	-0.0481507	-0.00559648	0.0589344	-0.0178745	0.0139055	0.0099033	-0.00583443	0.026036	0.0093941	0.00231759	-0.00929416	-0.006139
Salmonella_enterica_serovar_Enteritidis_P125109_uid59247|nrdD	19.1089	0.021932	0.0094849	-0.0168941	0.0045491	0.0137166	0.000364804	-0.0059463	-0.00578214	-0.0280242	-0.00782139	-0.012469	-0.00658106	0.0133518	0.0174595	-0.0146906	0.024347	-0.00138625	-0.00326135	0.00335619	-0.00570553
Salmonella_enterica_serovar_Gallinarum_287_91_uid59249|ileS	20.4432	0.0503905	0.00322509	-0.0330603	0.00926343	0.0282841	-0.000549126	-0.0191067	0.00308781	-0.0349945	0.0022129	0.00258581	-0.0293332	0.0166746	0.00870816	-0.0104498	0.0198997	-0.00128471	-0.00174778	-0.0033091	-0.0104969
Salmonella_enterica_serovar_Gallinarum_287_91_uid59249|speE	16.7615	0.0657592	0.00669331	-0.0367632	0.001998	0.0127123	0.0200799	-0.00484515	0.0379371	-0.0718781	0.0172577	-0.0265734	-0.000899101	0.0168082	-0.01496	-0.0186813	0.0206044	-0.00841658	-0.00014985	-0.0121379	-0.00454545
Salmonella_enterica_serovar_Gallinarum_287_91_uid59249|modF	20.9984	0.0172976	0.00288294	-0.0474244	0.0118332	-0.00207047	0.00874055	-0.033429	0.0213993	-0.0798443	-0.0140871	7.86256e-05	-0.0119642	0.0477782	0.0151747	0.0101951	0.0366657	0.0144147	0.0107455	-0.00264706	-0.00573967
Salmonella_enterica_serovar_Gallinarum_287_91_uid59249|argS	20.5625	0.0419803	-0.00190151	-0.0489831	0.0216209	0.0128207	-0.00594032	-0.0273775	0.0101292	-0.0310795	0.00459303	0.0104139	-0.0465427	0.0378925	0.00822764	-0.0131422	0.0113233	0.0130564	0.00513194	-0.0049819	0.00275888
Salmonella_enterica_serovar_Gallinarum_287_91_uid59249|prsA	17.8461	0.00689121	-0.00820751	-0.0287263	0.0267906	0.00108401	0.017499	-0.0356175	-0.00820751	-0.0512582	0.0146341	-0.00456833	0.00518777	0.00100658	-0.00402633	0.00139373	0.0514905	-0.00464576	0	0.0309717	-0.0116918
Salmonella_enterica_serovar_Gallinarum_287_91_uid59249|hemA	25.2514	0.0439265	-0.00591197	-0.0224705	-0.00107718	0.00618753	-0.0251384	-0.0420602	0.00582429	-0.0764548	-0.00442145	0.0506526	-0.03457	0.048661	0.00821664	0.0265913	0.030111	0.00596207	0.00433378	-0.00130264	-0.0170595
Salmonella_enterica_serovar_Gallinarum_287_91_uid59249|oppF	21.5791	0.0382003	0.0170055	-0.0201297	0.00250882	-0.00228397	0.00418925	-0.029952	0.0111358	-0.0468391	-0.000721876	0.00321886	-0.0511467	0.0211948	0.0411943	0.000473362	0.0322123	-0.0105441	0.00802348	-0.00707676	-0.0106625
Salmonella_enterica_serovar_Gallinarum_287_91_uid59249|pheS	20.7281	0.0568012	-0.0069419	-0.0567217	0.0111621	0.0163364	0.00716208	-0.0229541	0.0176391	-0.083419	0.00858104	-0.00119878	-0.00201223	0.0237554	0.0119878	-0.0123609	0.0313945	0.0222202	-0.00788379	-0.00695413	-0.00659327
Salmonella_enterica_serovar_Gallinarum_287_91_uid59249|hisA	24.3813	0.0440173	0.00809552	-0.0463883	0.00714709	0.01885	0.00802778	-0.0591075	0.00802778	-0.083665	-0.0166653	0.0190533	-0.0336015	0.0405453	-0.000609704	-0.000677449	0.0446947	0.0117707	0.00394614	0.0186468	0.00789229
Salmonella_enterica_serovar_Gallinarum_287_91_uid59249|dcd	26.9544	0.064138	-0.0139092	-0.0112933	0.0197948	0.0249761	-0.0122743	-0.021329	0.00130791	-0.0711806	0.00616228	0.0463555	-0.037527	-0.0184365	0.0434126	-0.0203481	0.0689924	-0.021983	0.0106897	-0.0200211	-0.037527
Salmonella_enterica_serovar_Gallinarum_287_91_uid59249|purM	21.7455	0.0197953	0.00853868	-0.0202456	-0.000188293	0.028334	-0.0115186	-0.0374294	0.00280802	-0.0545804	-0.014384	0.0169218	-0.0172984	0.014253	0.0113549	0.0113058	0.0199509	0.00559967	0.0142857	0.00257061	-7.36799e-05
Salmonella_enterica_serovar_Gallinarum_287_91_uid59249|pheA	20.1762	0.0453755	-0.0120254	-0.0135914	-0.010788	-0.00560668	-0.0263321	-0.0236447	0.0354381	-0.0458201	0.0132627	0.0411221	-0.0506921	0.0435194	0.00527801	0.00765602	0.0256941	0.0170907	-0.00228134	-0.0173227	-0.0263321
Salmonella_enterica_serovar_Gallinarum_287_91_uid59249|ffh	20.4782	0.0216483	0.00220751	-0.022649	0.0106696	0.00388521	0.0131126	-0.0425166	0.00880059	-0.0340103	0.0151582	-0.0117734	-0.000220751	-0.00693157	0.00640177	-0.0158057	0.032936	-0.00916851	0	0.0438411	-0.015585
Salmonella_enterica_serovar_Gallinarum_287_91_uid59249|alaS	19.0132	0.0613213	-0.00772468	-0.0266959	0.00347073	0.0252626	0.00858468	-0.0361969	0.00715646	-0.0383162	-0.00293323	0.0117073	-0.00941397	0.014231	-0.00403383	0.00312263	0.0235477	-0.0114514	-0.00319942	-0.00199132	-0.0164476
Salmonella_enterica_serovar_Gallinarum_287_91_uid59249|hypF	28.606	0.0833342	0.0100788	-0.0426207	-0.00081194	0.0167882	-0.00548537	-0.0727129	0.0139699	-0.0786834	0.00324602	0.0166213	-0.0495839	0.0354176	0.0373231	-0.0258465	0.0399606	-0.00263054	0.0174697	0.022969	-0.0188033
Salmonella_enterica_serovar_Gallinarum_287_91_uid59249|hypB	24.4796	0.0537254	0.00972906	0.00646552	-0.0440579	0.00544951	-0.00812808	-0.0643473	-0.0136084	-0.0746921	0.00526478	0.0275554	-0.0231527	0.0210899	0.0407635	0.0269704	0.0383313	0.00606527	0.00689655	-0.0251847	0.00486453
Salmonella_enterica_serovar_Gallinarum_287_91_uid59249|gldA	25.1263	0.0834571	0.0188044	-0.00726884	-0.0132895	0.030038	0.000571065	-0.065803	0.00628987	-0.0601168	0.00383429	0.0109971	-0.0122126	0.0174583	0.00766859	-0.0576612	0.00874545	0.00877808	0.00518037	0.0232097	-0.00868019
Salmonella_enterica_serovar_Gallinarum_287_91_uid59249|glnA	16.2219	0.0058229	-0.00716628	-0.0128171	0.00566992	0.00938453	-0.0114976	0.00151548	0.0139358	-0.0206861	0.016068	0.000965703	-0.00433132	-0.000989607	0.00375764	-0.00274891	0.0154082	0.00217522	-0.00918852	-0.0123773	0.00709935
Salmonella_enterica_serovar_Gallinarum_287_91_uid59249|pyrE	21.7683	0.037711	0.00398427	-0.0127903	0.0130948	0.0290318	0.0455272	-0.00525314	0.0234742	-0.0679863	0.0133739	0.000583682	-0.0623017	0.0166476	0.0119528	-0.0118005	0.0394112	-0.0226113	0	-0.0571755	0.00512625
Salmonella_enterica_serovar_Gallinarum_287_91_uid59249|sun	21.6028	0.0555689	0.000287384	-0.0296724	0.00114954	0.0277405	-0.0223042	-0.0551697	0.0222164	-0.04009	-0.0110802	0.0208034	-0.0427084	0.0621308	0.0299278	-0.0291535	0.0207475	-0.0172111	0.020979	-0.00664974	-0.00751189
Salmonella_enterica_serovar_Gallinarum_287_91_uid59249|lysC	20.8398	0.0428017	0.000452097	-0.0185645	0.00439724	-0.0208821	0.0037643	-0.049112	0.00731445	-0.0459235	-0.00559648	0.0589344	-0.0178745	0.0139055	0.0099033	-0.00583443	0.026036	0.0093941	0.00231759	-0.00929416	-0.006139
Salmonella_enterica_serovar_Gallinarum_287_91_uid59249|nrdD	19.1556	0.021932	0.0094849	-0.0168941	0.0045491	0.0137166	0.000364804	-0.0059463	-0.00578214	-0.0280242	-0.00782139	-0.012469	-0.00658106	0.0133518	0.0174595	-0.0146906	0.024347	-0.00138625	-0.00326135	0.00335619	-0.00570553
Salmonella_enterica_serovar_Paratyphi_A_ATCC_9150_uid58201|ileS	20.0552	0.0503905	0.00322509	-0.0330603	0.00926343	0.0282841	-0.000549126	-0.0180474	0.00308781	-0.0349945	0.0022129	0.00364513	-0.0293332	0.0166746	0.00764884	-0.0104498	0.0198997	-0.00128471	-0.00174778	-0.00436842	-0.0104969
Salmonella_enterica_serovar_Paratyphi_A_ATCC_9150_uid58201|speE	16.4131	0.0657592	0.00669331	-0.0367632	0.001998	0.0127123	0.0200799	-0.00134865	0.0379371	-0.0718781	0.0172577	-0.0300699	-0.000899101	0.0168082	-0.01496	-0.0186813	0.0206044	-0.00841658	-0.00014985	-0.0121379	-0.00454545
Salmonella_enterica_serovar_Paratyphi_A_ATCC_9150_uid58201|purM	21.5877	0.0182218	0.00882854	-0.0192932	0.000764088	0.0270504	-0.0112288	-0.0365184	0.00309788	-0.0538765	-0.0140941	0.0182883	-0.0196587	0.0117271	0.0118932	0.0120925	0.0204892	0.0062622	0.0144928	0.00116274	0.000298991
Salmonella_enterica_serovar_Paratyphi_A_ATCC_9150_uid58201|dcd	26.7825	0.064138	-0.0139092	-0.0112933	0.0197948	0.0249761	-0.0122743	-0.021329	0.00130791	-0.0711806	0.00616228	0.0463555	-0.037527	-0.0184365	0.0434126	-0.0203481	0.0689924	-0.021983	0.0106897	-0.0200211	-0.037527
Salmonella_enterica_serovar_Paratyphi_A_ATCC_9150_uid58201|hisA	24.5168	0.0440173	0.00809552	-0.0463883	0.00714709	0.01885	0.00802778	-0.0631891	0.00802778	-0.083665	-0.0166653	0.0190533	-0.0336015	0.0405453	-0.000609704	-0.000677449	0.0446947	0.0117707	0.00394614	0.0227284	0.00789229
Salmonella_enterica_serovar_Paratyphi_A_ATCC_9150_uid58201|argS	20.5625	0.0419803	-0.00190151	-0.0489831	0.0216209	0.0128207	-0.00594032	-0.0273775	0.0101292	-0.0310795	0.00459303	0.0104139	-0.0465427	0.0378925	0.00996074	-0.0166084	0.0113233	0.0147895	0.00513194	-0.0049819	0.00275888
Salmonella_enterica_serovar_Paratyphi_A_ATCC_9150_uid58201|prsA	17.5296	0.00371661	-0.00820751	-0.0287263	0.0267906	0.00425861	0.017499	-0.0356175	-0.00820751	-0.0512582	0.0146341	-0.00456833	0.00518777	0.00100658	-0.00402633	-0.00178087	0.0514905	-0.00147116	0	0.0309717	-0.0116918
Salmonella_enterica_serovar_Paratyphi_A_ATCC_9150_uid58201|hemA	25.0127	0.0439265	-0.00591197	-0.0224705	-0.00107718	0.00618753	-0.0251384	-0.0420602	0.00582429	-0.0764548	-0.00442145	0.0506526	-0.03457	0.048661	0.00821664	0.0265913	0.030111	0.00596207	0.00433378	-0.00130264	-0.0170595
Salmonella_enterica_serovar_Paratyphi_A_ATCC_9150_uid58201|oppF	21.7781	0.0411943	0.0170055	-0.0201297	0.00250882	-0.00228397	0.00418925	-0.0269579	0.0111358	-0.0468391	-0.000721876	0.00321886	-0.0511467	0.0211948	0.0411943	-0.00551466	0.0322123	-0.0105441	0.00802348	-0.00707676	-0.0106625
Salmonella_enterica_serovar_Paratyphi_A_ATCC_9150_uid58201|pheS	20.5248	0.0568012	-0.0069419	-0.0567217	0.0111621	0.0163364	0.00716208	-0.0229541	0.0176391	-0.083419	0.00858104	-0.00119878	-0.00201223	0.0237554	0.0119878	-0.0123609	0.0313945	0.0222202	-0.00788379	-0.00695413	-0.00659327
Salmonella_enterica_serovar_Paratyphi_A_ATCC_9150_uid58201|modF	21.2668	0.0247849	0.00311249	-0.047229	0.00506383	0.00206634	0.0125501	-0.0349089	0.0200513	-0.0793852	-0.0155328	0.00391751	-0.0129508	0.0444912	0.00998297	0.0198509	0.0373202	0.0155625	0.0106136	-0.0103688	-0.00899247
Salmonella_enterica_serovar_Paratyphi_A_ATCC_9150_uid58201|pheA	20.1762	0.0427848	-0.0120254	-0.0135914	-0.010788	-0.00560668	-0.0263321	-0.0236447	0.0354381	-0.0458201	0.0158534	0.0385314	-0.0506921	0.0435194	0.00527801	0.00765602	0.0256941	0.0196814	-0.00228134	-0.0173227	-0.0263321
Salmonella_enterica_serovar_Paratyphi_A_ATCC_9150_uid58201|ffh	21.0656	0.0238558	0.00220751	-0.027064	0.0106696	0.00388521	0.0131126	-0.0425166	0.00880059	-0.0340103	0.0151582	-0.0117734	-0.000220751	-0.00472406	0.00640177	-0.0158057	0.032936	-0.00916851	0	0.0438411	-0.015585
Salmonella_enterica_serovar_Paratyphi_A_ATCC_9150_uid58201|alaS	18.7471	0.0590382	-0.00772468	-0.0289791	0.00461228	0.0241211	0.00858468	-0.0350554	0.00715646	-0.0383162	-0.00293323	0.0105658	-0.00941397	0.0153726	-0.00403383	0.00312263	0.0235477	-0.0103098	-0.00319942	0.000291787	-0.0164476
Salmonella_enterica_serovar_Paratyphi_A_ATCC_9150_uid58201|hypB	24.4796	0.0502771	0.00972906	0.00646552	-0.0440579	0.00544951	-0.00812808	-0.0643473	-0.0136084	-0.0746921	0.00526478	0.0275554	-0.0231527	0.0210899	0.0407635	0.0269704	0.0383313	0.00951355	0.00689655	-0.0251847	0.00486453
Salmonella_enterica_serovar_Paratyphi_A_ATCC_9150_uid58201|sun	21.9129	0.0509069	0.000287384	-0.0296724	0.00114954	0.0277405	-0.0223042	-0.0551697	0.0198854	-0.04009	-0.0110802	0.0184724	-0.0427084	0.0644618	0.0299278	-0.0268225	0.0230785	-0.0148801	0.020979	-0.00664974	-0.00751189
Salmonella_enterica_serovar_Paratyphi_A_ATCC_9150_uid58201|pyrE	21.301	0.037711	0.00398427	-0.0127903	0.0130948	0.024337	0.0455272	-0.00525314	0.0234742	-0.0679863	0.0133739	0.00527852	-0.0623017	0.0166476	0.00725796	-0.0118005	0.0441061	-0.0226113	0	-0.0571755	0.00512625
Salmonella_enterica_serovar_Paratyphi_A_ATCC_9150_uid58201|glnA	16.5056	0.00369071	-0.00716628	-0.0128171	0.00780212	0.00938453	-0.0114976	0.00151548	0.0139358	-0.0206861	0.016068	0.000965703	-0.00433132	-0.000989607	0.00375764	-0.00274891	0.0154082	0.00217522	-0.00918852	-0.0123773	0.00709935
Salmonella_enterica_serovar_Paratyphi_A_ATCC_9150_uid58201|gldA	25.2169	0.0834571	0.0188044	-0.00726884	-0.0160143	0.0327628	0.000571065	-0.0630782	0.00628987	-0.0601168	0.0011095	0.0109971	-0.0122126	0.0174583	0.00766859	-0.0576612	0.00874545	0.00877808	0.00518037	0.0232097	-0.00868019
Salmonella_enterica_serovar_Paratyphi_A_ATCC_9150_uid58201|lysC	21.2101	0.0428017	0.000452097	-0.0185645	0.00439724	-0.0186549	0.0037643	-0.049112	0.00731445	-0.0481507	-0.00559648	0.0589344	-0.0178745	0.0139055	0.0099033	-0.00583443	0.026036	0.0093941	0.00231759	-0.00929416	-0.006139
Salmonella_enterica_serovar_Paratyphi_A_ATCC_9150_uid58201|nrdD	19.4362	0.0205275	0.0094849	-0.0168941	0.0045491	0.0137166	0.000364804	-0.0059463	-0.00578214	-0.0280242	-0.00782139	-0.012469	-0.00658106	0.0133518	0.0174595	-0.0146906	0.024347	1.82402e-05	-0.00326135	0.00335619	-0.00570553
Salmonella_enterica_serovar_Paratyphi_C_RKS4594_uid59063|ileS	20.1355	0.0492603	0.00303894	-0.0328254	0.00834594	0.0283196	1.82093e-05	-0.018792	0.00278198	-0.0337136	0.00189377	0.00270105	-0.0286595	0.0162225	0.00919571	-0.0110349	0.0192614	-0.000890234	-0.00205361	-0.00318056	-0.00988969
Salmonella_enterica_serovar_Paratyphi_C_RKS4594_uid59063|speE	16.4131	0.0657592	0.00669331	-0.0367632	0.001998	0.0127123	0.0200799	-0.00484515	0.0379371	-0.0718781	0.0172577	-0.0265734	-0.000899101	0.0168082	-0.01496	-0.0186813	0.0206044	-0.00841658	-0.00014985	-0.0121379	-0.00454545
Salmonella_enterica_serovar_Paratyphi_C_RKS4594_uid59063|modF	20.5216	0.0186749	0.00311249	-0.0513023	0.00913715	0.00206634	0.0125501	-0.0369455	0.0180146	-0.0793852	-0.0134961	0.00391751	-0.0129508	0.0465278	0.00998297	0.0198509	0.0373202	0.0196358	0.0106136	-0.00833213	-0.00899247
Salmonella_enterica_serovar_Paratyphi_C_RKS4594_uid59063|purM	21.2987	0.0182218	0.00882854	-0.0192932	0.000764088	0.0270504	-0.0112288	-0.0336199	0.00309788	-0.0538765	-0.0140941	0.0182883	-0.0196587	0.0117271	0.0118932	0.0120925	0.0204892	0.0062622	0.0144928	-0.00173581	0.000298991
Salmonella_enterica_serovar_Paratyphi_C_RKS4594_uid59063|dcd	26.4389	0.064138	-0.0139092	-0.0112933	0.0197948	0.0249761	-0.0122743	-0.021329	0.00130791	-0.0711806	0.00616228	0.0463555	-0.037527	-0.0184365	0.0434126	-0.0203481	0.0689924	-0.021983	0.0106897	-0.0200211	-0.037527
Salmonella_enterica_serovar_Paratyphi_C_RKS4594_uid59063|hisA	24.5168	0.0440173	0.00809552	-0.0423067	-0.00101617	0.01885	0.00802778	-0.0631891	0.00802778	-0.083665	-0.0166653	0.0190533	-0.0295199	0.0405453	-0.000609704	-0.000677449	0.0446947	0.0117707	0.00394614	0.0227284	0.00789229
Salmonella_enterica_serovar_Paratyphi_C_RKS4594_uid59063|argS	20.5746	0.0465578	-0.00172913	-0.0491216	0.0233448	0.0145014	-0.00512148	-0.0280332	0.0107325	-0.0315197	0.00549806	0.00936113	-0.0475431	0.0355899	0.0107796	-0.0192558	0.0126593	0.0108831	0.00534743	-0.00668114	0.0037501
Salmonella_enterica_serovar_Paratyphi_C_RKS4594_uid59063|prsA	17.6233	0.00792906	-0.00808541	-0.0282989	0.0243791	0.00486911	0.0178348	-0.0348544	-0.00808541	-0.051014	0.0149089	-0.00377468	0.00570669	0.00125078	-0.00683463	-0.00126195	0.0522536	-0.00418789	0	0.028835	-0.0115697
Salmonella_enterica_serovar_Paratyphi_C_RKS4594_uid59063|oppF	21.9771	0.0411943	0.0170055	-0.0201297	0.00250882	-0.00228397	0.00418925	-0.032946	0.0111358	-0.0468391	-0.000721876	0.00321886	-0.0511467	0.0211948	0.0411943	-0.00252065	0.0322123	-0.00755012	0.00802348	-0.00707676	-0.0106625
Salmonella_enterica_serovar_Paratyphi_C_RKS4594_uid59063|pheT	20.4846	0.0515655	0.00732693	-0.0333787	0.0101628	0.0191313	-0.0242899	-0.0295484	0.00207524	-0.0449697	-0.00405059	0.00873465	-0.0155416	0.0139432	-0.00164839	-0.00558545	0.033465	-0.00706355	0.00825784	0.0165588	-0.00514497
Salmonella_enterica_serovar_Paratyphi_C_RKS4594_uid59063|pheS	20.7281	0.0568012	-0.0069419	-0.0567217	0.0111621	0.0163364	0.00716208	-0.0229541	0.0176391	-0.083419	0.00858104	-0.00119878	-0.00201223	0.0237554	0.0119878	-0.0123609	0.0313945	0.0222202	-0.00788379	-0.00695413	-0.00659327
Salmonella_enterica_serovar_Paratyphi_C_RKS4594_uid59063|pheA	20.3484	0.0427848	-0.0120254	-0.0135914	-0.010788	-0.00560668	-0.0263321	-0.0236447	0.0354381	-0.0458201	0.0132627	0.0411221	-0.0506921	0.0435194	0.00527801	0.00765602	0.0256941	0.0196814	-0.00228134	-0.0173227	-0.0263321
Salmonella_enterica_serovar_Paratyphi_C_RKS4594_uid59063|ffh	20.6985	0.0238558	0.00220751	-0.0248565	0.0084621	0.00388521	0.0131126	-0.0425166	0.00880059	-0.0362178	0.0151582	-0.0117734	0.00198675	-0.00472406	0.00640177	-0.0158057	0.032936	-0.00916851	0	0.0438411	-0.015585
Salmonella_enterica_serovar_Paratyphi_C_RKS4594_uid59063|alaS	19.2032	0.0624629	-0.00772468	-0.0278375	0.00347073	0.0252626	0.00858468	-0.0361969	0.00715646	-0.0383162	-0.00293323	0.0117073	-0.00941397	0.014231	-0.00403383	0.00312263	0.0235477	-0.0125929	-0.00319942	-0.000849766	-0.0164476
Salmonella_enterica_serovar_Paratyphi_C_RKS4594_uid59063|hypB	23.9068	0.0502771	0.00972906	0.00646552	-0.0440579	0.00544951	-0.00812808	-0.0643473	-0.0136084	-0.0746921	0.00526478	0.0275554	-0.0231527	0.0210899	0.0407635	0.0269704	0.0383313	0.00951355	0.00689655	-0.0251847	0.00486453
Salmonella_enterica_serovar_Paratyphi_C_RKS4594_uid59063|sun	21.5253	0.0532379	0.000287384	-0.0320034	0.00348054	0.0277405	-0.0223042	-0.0551697	0.0198854	-0.04009	-0.0110802	0.0184724	-0.0427084	0.0644618	0.0299278	-0.0268225	0.0230785	-0.0172111	0.020979	-0.00664974	-0.00751189
Salmonella_enterica_serovar_Paratyphi_C_RKS4594_uid59063|pyrE	21.6126	0.037711	0.00398427	-0.0127903	0.0130948	0.0290318	0.0455272	-0.00525314	0.0234742	-0.0679863	0.0133739	0.000583682	-0.0623017	0.0166476	0.0119528	-0.0118005	0.0394112	-0.0226113	0	-0.0571755	0.00512625
Salmonella_enterica_serovar_Paratyphi_C_RKS4594_uid59063|glnA	16.4347	0.00369071	-0.00716628	-0.0128171	0.00780212	0.00938453	-0.0114976	0.00151548	0.0139358	-0.0206861	0.016068	0.000965703	-0.00433132	-0.000989607	0.00375764	-0.00274891	0.0154082	0.00217522	-0.00918852	-0.0123773	0.00709935
Salmonella_enterica_serovar_Paratyphi_C_RKS4594_uid59063|gldA	21.8395	0.0690651	0.0159762	-0.0157977	-0.0108158	0.0214206	0.00856823	-0.0634179	0.00885221	-0.060294	0.00371614	0.0158707	-0.03136	0.0091362	0.0128523	-0.0497379	0.0221184	0.0301186	0.00242604	0.0255505	-0.0142479
Salmonella_enterica_serovar_Paratyphi_C_RKS4594_uid59063|lysC	21.1361	0.0428017	0.000452097	-0.0163373	0.00439724	-0.0208821	0.0037643	-0.049112	0.00731445	-0.0503779	-0.00559648	0.0589344	-0.0178745	0.0161327	0.0099033	-0.00583443	0.026036	0.0093941	0.00231759	-0.00929416	-0.006139
Salmonella_enterica_serovar_Paratyphi_C_RKS4594_uid59063|nrdD	19.2809	0.021696	0.00942195	-0.0170868	0.00437993	0.0134963	0.000254647	-0.00471098	-0.00585689	-0.0281895	-0.0078686	-0.0126814	-0.00672269	0.0132417	0.0173415	-0.0148205	0.024166	-0.00152788	-0.00328495	0.00458365	-0.00583142
Salmonella_enterica_serovar_Typhimurium_LT2_uid57799|ileS	20.1258	0.0493312	0.00322509	-0.0330603	0.00926343	0.0282841	-0.000549126	-0.0191067	0.00308781	-0.0349945	0.0022129	0.00258581	-0.0293332	0.0166746	0.00870816	-0.0104498	0.0198997	-0.000225388	-0.00174778	-0.0033091	-0.0104969
Salmonella_enterica_serovar_Typhimurium_LT2_uid57799|speE	16.2969	0.0657592	0.00669331	-0.0367632	0.001998	0.0127123	0.0200799	-0.00484515	0.0379371	-0.0718781	0.0172577	-0.0265734	-0.000899101	0.0168082	-0.01496	-0.0186813	0.0206044	-0.00841658	-0.00014985	-0.0121379	-0.00454545
Salmonella_enterica_serovar_Typhimurium_LT2_uid57799|modF	20.9958	0.0227483	0.00311249	-0.0492657	0.00913715	0.00206634	0.0125501	-0.0349089	0.0180146	-0.0793852	-0.0155328	0.00391751	-0.0149874	0.0465278	0.00998297	0.0198509	0.0373202	0.0175991	0.0106136	-0.0103688	-0.00899247
Salmonella_enterica_serovar_Typhimurium_LT2_uid57799|pheS	20.7281	0.0568012	-0.0069419	-0.0567217	0.0111621	0.0163364	0.00716208	-0.0229541	0.0176391	-0.083419	0.00858104	-0.00119878	-0.00201223	0.0237554	0.0119878	-0.0123609	0.0313945	0.0222202	-0.00788379	-0.00695413	-0.00659327
Salmonella_enterica_serovar_Typhimurium_LT2_uid57799|oppF	21.9771	0.0411943	0.0170055	-0.0201297	0.00250882	-0.00228397	0.00418925	-0.0269579	0.0111358	-0.0468391	-0.000721876	0.000224847	-0.0511467	0.0211948	0.0411943	-0.00252065	0.0322123	-0.0105441	0.00802348	-0.00707676	-0.0106625
Salmonella_enterica_serovar_Typhimurium_LT2_uid57799|hemA	24.6945	0.0439265	-0.00591197	-0.0224705	-0.00107718	0.00618753	-0.0251384	-0.0420602	0.00582429	-0.0764548	-0.00442145	0.0506526	-0.03457	0.048661	0.00821664	0.0265913	0.030111	0.00596207	0.00433378	-0.00130264	-0.0170595
Salmonella_enterica_serovar_Typhimurium_LT2_uid57799|prsA	17.8461	0.00689121	-0.00820751	-0.0287263	0.0267906	0.00425861	0.017499	-0.0356175	-0.00820751	-0.0512582	0.0146341	-0.00456833	0.00518777	0.00100658	-0.00402633	-0.00178087	0.0514905	-0.00464576	0	0.0309717	-0.0116918
Salmonella_enterica_serovar_Typhimurium_LT2_uid57799|argS	20.5048	0.0454465	-0.00190151	-0.0489831	0.0198878	0.0128207	-0.00594032	-0.0273775	0.0101292	-0.0310795	0.00459303	0.0104139	-0.0448096	0.0378925	0.00996074	-0.0166084	0.0113233	0.0113233	0.00513194	-0.0049819	0.00275888
Salmonella_enterica_serovar_Typhimurium_LT2_uid57799|hisA	24.5168	0.0440173	0.00809552	-0.0463883	0.00714709	0.01885	0.00802778	-0.0631891	0.00802778	-0.083665	-0.0166653	0.0190533	-0.0376831	0.0405453	-0.000609704	-0.000677449	0.0446947	0.0158523	0.00394614	0.0227284	0.00789229
Salmonella_enterica_serovar_Typhimurium_LT2_uid57799|dcd	26.7825	0.064138	-0.0139092	-0.0112933	0.0197948	0.0249761	-0.0122743	-0.021329	0.00130791	-0.0711806	0.00616228	0.0463555	-0.037527	-0.0184365	0.0434126	-0.0203481	0.0689924	-0.021983	0.0106897	-0.0200211	-0.037527
Salmonella_enterica_serovar_Typhimurium_LT2_uid57799|purM	21.2987	0.0182218	0.00882854	-0.0192932	0.000764088	0.0270504	-0.0112288	-0.0365184	0.00309788	-0.0538765	-0.0140941	0.0182883	-0.0196587	0.0117271	0.0118932	0.0120925	0.0204892	0.0062622	0.0144928	0.00116274	0.000298991
Salmonella_enterica_serovar_Typhimurium_LT2_uid57799|pheA	19.9178	0.0427848	-0.0120254	-0.0135914	-0.010788	-0.00560668	-0.0263321	-0.0236447	0.0354381	-0.0458201	0.0132627	0.0411221	-0.0506921	0.0435194	0.00527801	0.00765602	0.0256941	0.0196814	-0.00228134	-0.0173227	-0.0263321
Salmonella_enterica_serovar_Typhimurium_LT2_uid57799|ffh	20.6985	0.0238558	0.00220751	-0.0248565	0.0106696	0.00388521	0.0131126	-0.0425166	0.00880059	-0.0362178	0.0151582	-0.0117734	-0.000220751	-0.00472406	0.00640177	-0.0158057	0.032936	-0.00916851	0	0.0438411	-0.015585
Salmonella_enterica_serovar_Typhimurium_LT2_uid57799|alaS	19.0132	0.0613213	-0.00772468	-0.0278375	0.00461228	0.0252626	0.00858468	-0.0361969	0.00715646	-0.0383162	-0.00293323	0.0117073	-0.00941397	0.014231	-0.00403383	0.00312263	0.0235477	-0.0114514	-0.00319942	-0.00199132	-0.0164476
Salmonella_enterica_serovar_Typhimurium_LT2_uid57799|hypF	28.3383	0.0860152	0.0100788	-0.0426207	-0.00215242	0.0167882	-0.00414489	-0.0727129	0.0139699	-0.0786834	0.00324602	0.0166213	-0.0495839	0.0354176	0.0373231	-0.024506	0.0386202	-0.00397103	0.0174697	0.0216285	-0.0188033
Salmonella_enterica_serovar_Typhimurium_LT2_uid57799|hypB	23.9068	0.0537254	0.00972906	0.00646552	-0.0440579	0.00544951	-0.00812808	-0.0643473	-0.0136084	-0.0746921	0.00526478	0.0275554	-0.0231527	0.0210899	0.0407635	0.0269704	0.0383313	0.00606527	0.00689655	-0.0251847	0.00486453
Salmonella_enterica_serovar_Typhimurium_LT2_uid57799|sun	21.4477	0.0509069	0.000287384	-0.0296724	0.00114954	0.0277405	-0.0223042	-0.0551697	0.0222164	-0.04009	-0.0110802	0.0184724	-0.0427084	0.0644618	0.0299278	-0.0244915	0.0207475	-0.0172111	0.020979	-0.00664974	-0.00751189
Salmonella_enterica_serovar_Typhimurium_LT2_uid57799|pyrE	21.6126	0.037711	0.00398427	-0.0127903	0.0130948	0.0290318	0.0455272	-0.00525314	0.0234742	-0.0679863	0.0133739	0.000583682	-0.0623017	0.0166476	0.0119528	-0.0118005	0.0394112	-0.0226113	0	-0.0571755	0.00512625
Salmonella_enterica_serovar_Typhimurium_LT2_uid57799|glnA	16.5056	0.00369071	-0.00716628	-0.0128171	0.00780212	0.00938453	-0.0114976	0.00151548	0.0139358	-0.0206861	0.016068	0.000965703	-0.00433132	-0.000989607	0.00375764	-0.00274891	0.0154082	0.00217522	-0.00918852	-0.0123773	0.00709935
Salmonella_enterica_serovar_Typhimurium_LT2_uid57799|gldA	21.9295	0.0663551	0.0186862	-0.0157977	-0.0108158	0.0214206	0.00856823	-0.0634179	0.00885221	-0.060294	0.00371614	0.0158707	-0.02865	0.0091362	0.0128523	-0.055158	0.0221184	0.0328287	0.00242604	0.0255505	-0.0142479
Salmonella_enterica_serovar_Typhimurium_LT2_uid57799|lysC	21.1361	0.0405745	0.000452097	-0.0163373	0.00439724	-0.0208821	0.0037643	-0.049112	0.00731445	-0.0481507	-0.00559648	0.0589344	-0.0178745	0.0139055	0.0099033	-0.00583443	0.026036	0.0116213	0.00231759	-0.00929416	-0.006139
Salmonella_enterica_serovar_Typhimurium_LT2_uid57799|nrdD	19.5297	0.021932	0.0094849	-0.0168941	0.0045491	0.0137166	0.000364804	-0.0059463	-0.00578214	-0.0280242	-0.00782139	-0.012469	-0.00658106	0.0133518	0.0174595	-0.0146906	0.024347	-0.00138625	-0.00326135	0.00335619	-0.00570553
Salmonella_enterica_serovar_Typhi_CT18_uid57793|ileS	20.1963	0.0503905	0.00322509	-0.0330603	0.00926343	0.0282841	-0.000549126	-0.0180474	0.00308781	-0.0349945	0.00115358	0.00258581	-0.0293332	0.0166746	0.00870816	-0.0104498	0.0198997	-0.00128471	-0.00174778	-0.0033091	-0.0104969
Salmonella_enterica_serovar_Typhi_CT18_uid57793|speE	16.5292	0.0657592	0.00669331	-0.0367632	0.001998	0.0127123	0.0200799	-0.00484515	0.0379371	-0.0718781	0.0172577	-0.0265734	-0.000899101	0.0168082	-0.0184565	-0.0151848	0.0206044	-0.00841658	-0.00014985	-0.0121379	-0.00454545
Salmonella_enterica_serovar_Typhi_CT18_uid57793|modF	20.5216	0.0227483	0.00107583	-0.0492657	0.00710049	0.00206634	0.0125501	-0.0369455	0.0180146	-0.0793852	-0.0134961	0.00391751	-0.0129508	0.0485645	0.00998297	0.0198509	0.0352836	0.0175991	0.0106136	-0.0103688	-0.00695581
Salmonella_enterica_serovar_Typhi_CT18_uid57793|oppF	22.3751	0.0411943	0.0170055	-0.0201297	0.00250882	-0.00228397	0.00418925	-0.029952	0.0111358	-0.0468391	-0.000721876	0.00321886	-0.0511467	0.0211948	0.0411943	-0.00252065	0.0322123	-0.0105441	0.00802348	-0.00707676	-0.0106625
Salmonella_enterica_serovar_Typhi_CT18_uid57793|pheS	20.5248	0.0568012	-0.0069419	-0.0567217	0.0111621	0.0163364	0.00716208	-0.0229541	0.0176391	-0.083419	0.00858104	-0.00119878	-0.00201223	0.0237554	0.0119878	-0.0123609	0.0313945	0.0222202	-0.00788379	-0.00695413	-0.00659327
Salmonella_enterica_serovar_Typhi_CT18_uid57793|hemA	25.0127	0.0439265	-0.00591197	-0.0224705	-0.00107718	0.00618753	-0.0251384	-0.0420602	0.00582429	-0.0764548	-0.00442145	0.0506526	-0.03457	0.048661	0.00821664	0.0265913	0.030111	0.00596207	0.00433378	-0.00130264	-0.0170595
Salmonella_enterica_serovar_Typhi_CT18_uid57793|prsA	17.6351	0.00689121	-0.00820751	-0.0287263	0.0267906	0.00425861	0.017499	-0.0356175	-0.00820751	-0.0512582	0.0146341	-0.00456833	0.00518777	0.00100658	-0.00402633	-0.00178087	0.0514905	-0.00464576	0	0.0309717	-0.0116918
Salmonella_enterica_serovar_Typhi_CT18_uid57793|argS	20.4472	0.0402472	-0.00190151	-0.0489831	0.0216209	0.0128207	-0.00594032	-0.0273775	0.0101292	-0.0310795	0.00459303	0.0104139	-0.0465427	0.0378925	0.00996074	-0.0166084	0.0113233	0.0165226	0.00513194	-0.0049819	0.00275888
Salmonella_enterica_serovar_Typhi_CT18_uid57793|hisA	24.2458	0.0440173	0.00809552	-0.0463883	0.00714709	0.01885	0.00802778	-0.0591075	0.00802778	-0.083665	-0.0166653	0.0190533	-0.0336015	0.0405453	-0.000609704	-0.000677449	0.0446947	0.0117707	0.00394614	0.0186468	0.00789229
Salmonella_enterica_serovar_Typhi_CT18_uid57793|dcd	26.0953	0.064138	-0.0139092	-0.0112933	0.0197948	0.0249761	-0.0122743	-0.021329	0.00130791	-0.0711806	0.00616228	0.0463555	-0.037527	-0.0184365	0.0434126	-0.0203481	0.0689924	-0.021983	0.0106897	-0.0200211	-0.037527
Salmonella_enterica_serovar_Typhi_CT18_uid57793|purM	21.2987	0.0211204	0.00882854	-0.0192932	0.000764088	0.0270504	-0.0112288	-0.0336199	0.00309788	-0.0538765	-0.0140941	0.0182883	-0.0196587	0.00882854	0.00899464	0.0149911	0.0233877	0.00336365	0.0144928	-0.00173581	0.000298991
Salmonella_enterica_serovar_Typhi_CT18_uid57793|pheA	20.09	0.0427848	-0.0120254	-0.0135914	-0.010788	-0.00560668	-0.0263321	-0.0236447	0.0354381	-0.0458201	0.0132627	0.0411221	-0.0481015	0.0435194	0.00527801	0.00506535	0.0256941	0.0196814	-0.00228134	-0.0173227	-0.0263321
Salmonella_enterica_serovar_Typhi_CT18_uid57793|ffh	20.6251	0.0238558	0.00220751	-0.0248565	0.0106696	0.00388521	0.0131126	-0.0425166	0.00880059	-0.0362178	0.0151582	-0.0117734	-0.000220751	-0.00472406	0.00640177	-0.0158057	0.032936	-0.00916851	0	0.0438411	-0.015585
Salmonella_enterica_serovar_Typhi_CT18_uid57793|alaS	19.2032	0.0601798	-0.00772468	-0.0278375	0.00461228	0.0252626	0.00858468	-0.0361969	0.00715646	-0.0383162	-0.00293323	0.0117073	-0.00941397	0.014231	-0.00403383	0.00426418	0.0235477	-0.0114514	-0.00319942	-0.00199132	-0.0164476
Salmonella_enterica_serovar_Typhi_CT18_uid57793|hypB	24.365	0.0502771	0.00972906	0.00646552	-0.0440579	0.00544951	-0.00812808	-0.0643473	-0.0136084	-0.0746921	0.00526478	0.0275554	-0.0231527	0.0210899	0.0407635	0.0269704	0.0383313	0.00951355	0.00689655	-0.0251847	0.00486453
Salmonella_enterica_serovar_Typhi_CT18_uid57793|gldA	25.2169	0.0834571	0.0188044	-0.00726884	-0.0132895	0.030038	0.000571065	-0.0630782	0.00628987	-0.0601168	0.00383429	0.0109971	-0.0122126	0.0174583	0.00494379	-0.0549364	0.00874545	0.00605329	0.00518037	0.0232097	-0.00868019
Salmonella_enterica_serovar_Typhi_CT18_uid57793|glnA	16.5056	0.00369071	-0.00716628	-0.0128171	0.00780212	0.00938453	-0.0114976	0.00151548	0.0139358	-0.0206861	0.016068	0.000965703	-0.00433132	-0.000989607	0.00375764	-0.00274891	0.0154082	0.00217522	-0.00918852	-0.0123773	0.00709935
Salmonella_enterica_serovar_Typhi_CT18_uid57793|pyrE	21.4568	0.037711	0.00398427	-0.0127903	0.0130948	0.024337	0.0455272	-0.00525314	0.0234742	-0.0679863	0.0133739	0.000583682	-0.0623017	0.0166476	0.0119528	-0.0118005	0.0441061	-0.0226113	0	-0.0571755	0.00512625
Salmonella_enterica_serovar_Typhi_CT18_uid57793|sun	22.0679	0.0555689	0.000287384	-0.0296724	0.00114954	0.0277405	-0.0223042	-0.0551697	0.0198854	-0.04009	-0.0110802	0.0208034	-0.0427084	0.0621308	0.0299278	-0.0268225	0.0230785	-0.0195421	0.020979	-0.00664974	-0.00751189
Salmonella_enterica_serovar_Typhi_CT18_uid57793|lysC	21.1361	0.0428017	0.000452097	-0.0163373	0.00439724	-0.0208821	0.0037643	-0.049112	0.00731445	-0.0481507	-0.00559648	0.0589344	-0.0178745	0.0139055	0.0099033	-0.00583443	0.026036	0.0093941	0.00231759	-0.00929416	-0.006139
Salmonella_enterica_serovar_Typhi_CT18_uid57793|nrdD	19.0621	0.021932	0.0094849	-0.0168941	0.00314461	0.0137166	0.000364804	-0.0059463	-0.00578214	-0.0280242	-0.00782139	-0.012469	-0.00658106	0.0133518	0.0174595	-0.0132862	0.024347	-0.00138625	-0.00326135	0.00335619	-0.00570553
Salmonella_enterica_serovar_Typhi_Ty2_uid57973|ileS	20.1963	0.0503905	0.00322509	-0.0330603	0.00926343	0.0282841	-0.000549126	-0.0180474	0.00308781	-0.0349945	0.00115358	0.00258581	-0.0293332	0.0166746	0.00870816	-0.0104498	0.0198997	-0.00128471	-0.00174778	-0.0033091	-0.0104969
Salmonella_enterica_serovar_Typhi_Ty2_uid57973|speE	16.5292	0.0657592	0.00669331	-0.0367632	0.001998	0.0127123	0.0200799	-0.00484515	0.0379371	-0.0718781	0.0172577	-0.0265734	-0.000899101	0.0168082	-0.0184565	-0.0151848	0.0206044	-0.00841658	-0.00014985	-0.0121379	-0.00454545
Salmonella_enterica_serovar_Typhi_Ty2_uid57973|purM	21.2987	0.0211204	0.00882854	-0.0192932	0.000764088	0.0270504	-0.0112288	-0.0336199	0.00309788	-0.0538765	-0.0140941	0.0182883	-0.0196587	0.00882854	0.00899464	0.0149911	0.0233877	0.00336365	0.0144928	-0.00173581	0.000298991
Salmonella_enterica_serovar_Typhi_Ty2_uid57973|dcd	26.0953	0.064138	-0.0139092	-0.0112933	0.0197948	0.0249761	-0.0122743	-0.021329	0.00130791	-0.0711806	0.00616228	0.0463555	-0.037527	-0.0184365	0.0434126	-0.0203481	0.0689924	-0.021983	0.0106897	-0.0200211	-0.037527
Salmonella_enterica_serovar_Typhi_Ty2_uid57973|hisA	24.2458	0.0440173	0.00809552	-0.0463883	0.00714709	0.01885	0.00802778	-0.0591075	0.00802778	-0.083665	-0.0166653	0.0190533	-0.0336015	0.0405453	-0.000609704	-0.000677449	0.0446947	0.0117707	0.00394614	0.0186468	0.00789229
Salmonella_enterica_serovar_Typhi_Ty2_uid57973|argS	20.4472	0.0402472	-0.00190151	-0.0489831	0.0216209	0.0128207	-0.00594032	-0.0273775	0.0101292	-0.0310795	0.00459303	0.0104139	-0.0465427	0.0378925	0.00996074	-0.0166084	0.0113233	0.0165226	0.00513194	-0.0049819	0.00275888
Salmonella_enterica_serovar_Typhi_Ty2_uid57973|prsA	17.6351	0.00689121	-0.00820751	-0.0287263	0.0267906	0.00425861	0.017499	-0.0356175	-0.00820751	-0.0512582	0.0146341	-0.00456833	0.00518777	0.00100658	-0.00402633	-0.00178087	0.0514905	-0.00464576	0	0.0309717	-0.0116918
Salmonella_enterica_serovar_Typhi_Ty2_uid57973|hemA	25.0127	0.0439265	-0.00591197	-0.0224705	-0.00107718	0.00618753	-0.0251384	-0.0420602	0.00582429	-0.0764548	-0.00442145	0.0506526	-0.03457	0.048661	0.00821664	0.0265913	0.030111	0.00596207	0.00433378	-0.00130264	-0.0170595
Salmonella_enterica_serovar_Typhi_Ty2_uid57973|pheS	20.5248	0.0568012	-0.0069419	-0.0567217	0.0111621	0.0163364	0.00716208	-0.0229541	0.0176391	-0.083419	0.00858104	-0.00119878	-0.00201223	0.0237554	0.0119878	-0.0123609	0.0313945	0.0222202	-0.00788379	-0.00695413	-0.00659327
Salmonella_enterica_serovar_Typhi_Ty2_uid57973|oppF	22.2756	0.0411943	0.0170055	-0.0201297	-0.000485196	-0.00228397	0.00418925	-0.029952	0.0111358	-0.0468391	-0.000721876	0.00321886	-0.0481527	0.0211948	0.0411943	-0.00252065	0.0322123	-0.0105441	0.00802348	-0.00707676	-0.0106625
Salmonella_enterica_serovar_Typhi_Ty2_uid57973|modF	20.5216	0.0227483	0.00107583	-0.0492657	0.00710049	0.00206634	0.0125501	-0.0369455	0.0180146	-0.0793852	-0.0134961	0.00391751	-0.0129508	0.0485645	0.00998297	0.0198509	0.0352836	0.0175991	0.0106136	-0.0103688	-0.00695581
Salmonella_enterica_serovar_Typhi_Ty2_uid57973|pheA	20.09	0.0427848	-0.0120254	-0.0135914	-0.010788	-0.00560668	-0.0263321	-0.0236447	0.0354381	-0.0458201	0.0132627	0.0411221	-0.0481015	0.0435194	0.00527801	0.00506535	0.0256941	0.0196814	-0.00228134	-0.0173227	-0.0263321
Salmonella_enterica_serovar_Typhi_Ty2_uid57973|ffh	20.6251	0.0238558	0.00220751	-0.0248565	0.0106696	0.00388521	0.0131126	-0.0425166	0.00880059	-0.0362178	0.0151582	-0.0117734	-0.000220751	-0.00472406	0.00640177	-0.0158057	0.032936	-0.00916851	0	0.0438411	-0.015585
Salmonella_enterica_serovar_Typhi_Ty2_uid57973|alaS	19.2032	0.0601798	-0.00772468	-0.0278375	0.00461228	0.0252626	0.00858468	-0.0361969	0.00715646	-0.0383162	-0.00293323	0.0117073	-0.00941397	0.014231	-0.00403383	0.00426418	0.0235477	-0.0114514	-0.00319942	-0.00199132	-0.0164476
Salmonella_enterica_serovar_Typhi_Ty2_uid57973|hypB	24.365	0.0502771	0.00972906	0.00646552	-0.0440579	0.00544951	-0.00812808	-0.0643473	-0.0136084	-0.0746921	0.00526478	0.0275554	-0.0231527	0.0210899	0.0407635	0.0269704	0.0383313	0.00951355	0.00689655	-0.0251847	0.00486453
Salmonella_enterica_serovar_Typhi_Ty2_uid57973|gldA	25.2169	0.0834571	0.0188044	-0.00726884	-0.0132895	0.030038	0.000571065	-0.0630782	0.00628987	-0.0601168	0.00383429	0.0109971	-0.0122126	0.0174583	0.00494379	-0.0549364	0.00874545	0.00605329	0.00518037	0.0232097	-0.00868019
Salmonella_enterica_serovar_Typhi_Ty2_uid57973|glnA	16.5056	0.00369071	-0.00716628	-0.0128171	0.00780212	0.00938453	-0.0114976	0.00151548	0.0139358	-0.0206861	0.016068	0.000965703	-0.00433132	-0.000989607	0.00375764	-0.00274891	0.0154082	0.00217522	-0.00918852	-0.0123773	0.00709935
Salmonella_enterica_serovar_Typhi_Ty2_uid57973|pyrE	21.4568	0.037711	0.00398427	-0.0127903	0.0130948	0.024337	0.0455272	-0.00525314	0.0234742	-0.0679863	0.0133739	0.000583682	-0.0623017	0.0166476	0.0119528	-0.0118005	0.0441061	-0.0226113	0	-0.0571755	0.00512625
Salmonella_enterica_serovar_Typhi_Ty2_uid57973|sun	22.0679	0.0555689	0.000287384	-0.0296724	0.00114954	0.0277405	-0.0223042	-0.0551697	0.0198854	-0.04009	-0.0110802	0.0208034	-0.0427084	0.0621308	0.0299278	-0.0268225	0.0230785	-0.0195421	0.020979	-0.00664974	-0.00751189
Salmonella_enterica_serovar_Typhi_Ty2_uid57973|lysC	21.1361	0.0428017	0.000452097	-0.0163373	0.00439724	-0.0208821	0.0037643	-0.049112	0.00731445	-0.0481507	-0.00559648	0.0589344	-0.0178745	0.0139055	0.0099033	-0.00583443	0.026036	0.0093941	0.00231759	-0.00929416	-0.006139
Salmonella_enterica_serovar_Typhi_Ty2_uid57973|nrdD	19.0621	0.021932	0.0094849	-0.0168941	0.00314461	0.0137166	0.000364804	-0.0059463	-0.00578214	-0.0280242	-0.00782139	-0.012469	-0.00658106	0.0133518	0.0174595	-0.0132862	0.024347	-0.00138625	-0.00326135	0.00335619	-0.00570553
Shigella_boydii_Sb227_uid58215|ileS	21.0793	0.0594953	0.00331996	-0.0358452	0.0118632	0.027733	-0.00456958	-0.0283289	0.00644195	-0.0345812	0.00237552	0.0105228	-0.0376722	0.0137067	0.00899275	-0.00908555	0.0180927	-0.00308488	-0.00159193	0.00248894	-0.0102733
Shigella_boydii_Sb227_uid58215|speE	13.2744	0.0581349	0.00654762	-0.033631	0.0014881	0.00525794	0.0196429	-0.00178571	0.0270833	-0.0616071	0.0135913	-0.0270833	-0.0046627	0.0234127	-0.0117063	-0.00505952	0.0203373	-0.0123016	-0.000198413	-0.0125992	-0.00486111
Shigella_boydii_Sb227_uid58215|modF	18.0537	0.0127021	-0.000944203	-0.0430393	0.00315602	0.00425263	0.0126166	-0.0307275	0.0139995	-0.0732129	-0.0155162	0.0123676	-0.0128843	0.0588974	0.0121111	0.0240697	0.0191108	0.00752388	0.0106427	-0.00821159	-0.00691424
Shigella_boydii_Sb227_uid58215|hisA	22.4843	0.0440173	0.00809552	-0.0341434	0.00306546	0.01885	0.00802778	-0.0713524	0.00394614	-0.083665	-0.0125836	0.0190533	-0.0295199	0.0364637	-0.000609704	0.00340418	0.0406131	0.0117707	0.00394614	0.0227284	0.00789229
Shigella_boydii_Sb227_uid58215|dcd	26.9544	0.0693194	-0.0139092	-0.00093063	0.0146134	0.0249761	-0.0174556	-0.021329	0.00130791	-0.0711806	0.00616228	0.0515368	-0.0271643	-0.0236179	0.03305	-0.0203481	0.0689924	-0.0271643	0.0106897	-0.0200211	-0.037527
Shigella_boydii_Sb227_uid58215|argS	18.198	0.0419803	-0.00190151	-0.0316521	0.0129554	0.0128207	-0.00594032	-0.0273775	0.0118623	-0.0276133	0.00459303	0.012147	-0.0430765	0.0344263	0.00996074	-0.0235408	0.0113233	0.00785714	0.00513194	-0.00671501	0.00275888
Shigella_boydii_Sb227_uid58215|pheS	20.9313	0.0476269	-0.0069419	-0.0506055	0.00810398	0.0163364	0.00716208	-0.0290703	0.0176391	-0.0803609	0.00858104	-0.00119878	-0.00812844	0.0237554	0.0119878	-0.00624465	0.0313945	0.0252783	-0.00788379	-0.00083792	-0.00659327
Shigella_boydii_Sb227_uid58215|hemA	21.9101	0.0463188	-0.00591197	-0.0105088	-0.0106466	0.00379519	-0.0251384	-0.0420602	0.00821664	-0.0668854	0.000363236	0.0458679	-0.0369623	0.0390917	0.00821664	0.024199	0.0325033	0.00117738	0.00433378	0.00108971	-0.0170595
Shigella_boydii_Sb227_uid58215|prsA	15.9473	0.00371661	-0.00820751	-0.0287263	0.0267906	0.00425861	0.017499	-0.0356175	-0.00820751	-0.0512582	0.0146341	-0.00456833	0.00518777	0.00100658	-0.00402633	0.00456833	0.0514905	-0.00782036	0	0.0309717	-0.0116918
Shigella_boydii_Sb227_uid58215|purM	19.0829	0.00952618	0.00882854	-0.0221918	0.00656119	0.0299489	-0.0112288	-0.039417	0.00309788	-0.0509779	-0.0140941	0.0182883	-0.0225572	0.0117271	0.0147917	0.0149911	0.0175906	0.0062622	0.0144928	0.00406129	0.000298991
Shigella_boydii_Sb227_uid58215|pheA	14.9221	0.0350128	-0.0120254	-0.00322868	-0.0133787	-0.00560668	-0.0237414	-0.0288261	0.0276661	-0.0380481	0.0132627	0.0437128	-0.0481015	0.0409288	0.00527801	0.00506535	0.0256941	0.0222721	-0.00228134	-0.0199134	-0.0237414
Shigella_boydii_Sb227_uid58215|ffh	20.0377	0.0260633	0.00220751	-0.0248565	0.0106696	0.00388521	0.0131126	-0.0425166	0.00880059	-0.0406328	0.0173657	-0.0139809	0.00419426	-0.00693157	0.00640177	-0.0158057	0.0351435	-0.011376	0	0.0438411	-0.015585
Shigella_boydii_Sb227_uid58215|hypB	21.845	0.036484	0.0131773	0.0133621	-0.0475062	0.00889778	-0.00812808	-0.0643473	-0.0170567	-0.0677956	0.00871305	0.0241071	-0.0197044	0.0176416	0.0407635	0.0269704	0.0383313	0.00951355	0.00689655	-0.0251847	0.00486453
Shigella_boydii_Sb227_uid58215|hypF	25.8416	0.0786407	0.0112477	-0.0401971	-0.00377173	0.0177069	-0.00698314	-0.0742464	0.0178054	-0.0734215	0.00713878	0.0200208	-0.0417484	0.0444721	0.0356109	-0.0354086	0.0289079	-0.00550454	0.018703	0.0212711	-0.0202438
Shigella_boydii_Sb227_uid58215|alaS	17.7209	0.0601798	-0.00772468	-0.0278375	0.00575383	0.0195548	0.00858468	-0.0339138	0.00829801	-0.0360331	-0.00293323	0.00828265	-0.00941397	0.0108064	-0.00403383	0.0111135	0.0235477	-0.0125929	-0.00319942	-0.00199132	-0.0164476
Shigella_boydii_Sb227_uid58215|sun	17.6493	0.0555689	0.00261839	-0.0250104	-0.00118147	0.0184165	-0.0269662	-0.0481767	0.0222164	-0.033097	-0.00641824	0.0208034	-0.0473704	0.0644618	0.0252658	-0.0128365	0.0184165	-0.0265351	0.02331	-0.0159738	-0.00751189
Shigella_boydii_Sb227_uid58215|pyrE	20.678	0.037711	0.00398427	-0.00809542	0.00839995	0.0290318	0.0455272	-0.00994798	0.0187793	-0.0679863	0.0133739	0.00997335	-0.0529121	0.0166476	0.0119528	-0.0164954	0.0347164	-0.0226113	0	-0.0571755	0.00512625
Shigella_boydii_Sb227_uid58215|glnA	13.3851	-0.00270588	-0.00716628	-0.0106849	0.00780212	0.00725234	-0.0114976	0.00151548	0.0139358	-0.0228183	0.016068	0.000965703	-0.00433132	0.00114259	0.00375764	0.00364768	0.0154082	4.30264e-05	-0.00918852	-0.0102451	0.00709935
Shigella_boydii_Sb227_uid58215|gldA	21.2313	0.0807323	0.0160796	-0.00181925	-0.0132895	0.0354876	0.00602066	-0.065803	0.00356508	-0.057392	0.0011095	0.00827228	-0.0176622	0.0174583	0.00766859	-0.0631108	0.00874545	0.00877808	0.00518037	0.0286593	-0.00868019
Shigella_boydii_Sb227_uid58215|lysC	18.5435	0.047256	0.000452097	-0.011883	-5.7107e-05	-0.0186549	0.0037643	-0.0513392	0.00286011	-0.0481507	-0.00782365	0.0633887	-0.011193	0.00722403	0.0099033	-0.00583443	0.0282632	0.00271258	0.00231759	-0.00929416	-0.00391183
Shigella_boydii_Sb227_uid58215|nrdD	17.6596	0.019123	0.0094849	-0.0126806	0.00174011	0.0137166	-0.00103969	-0.00454181	-0.00578214	-0.0280242	-0.00782139	-0.0138735	-0.000963082	0.0119473	0.016055	-0.0160951	0.0229425	-0.00138625	-0.00326135	0.00616518	-0.00570553
Shigella_dysenteriae_Sd197_uid58213|speE	14.0818	0.0581349	0.00654762	-0.033631	-0.00198413	0.0122024	0.0196429	-0.00525794	0.0270833	-0.0616071	0.0135913	-0.0236111	-0.0046627	0.0234127	-0.0117063	-0.012004	0.0203373	-0.0123016	-0.000198413	-0.00912698	-0.00486111
Shigella_dysenteriae_Sd197_uid58213|ileS	20.8663	0.0594953	0.00331996	-0.0358452	0.0118632	0.0266669	-0.00563568	-0.0283289	0.00537586	-0.0345812	0.00237552	0.0115889	-0.0366061	0.0137067	0.00899275	-0.00695335	0.0180927	-0.00308488	-0.00159193	0.00142284	-0.0102733
Shigella_dysenteriae_Sd197_uid58213|modF	18.1216	0.0127021	-0.000944203	-0.0430393	0.00315602	0.00425263	0.0126166	-0.0307275	0.0119587	-0.0732129	-0.0155162	0.0123676	-0.0128843	0.0588974	0.0121111	0.0240697	0.0211516	0.0095647	0.0106427	-0.0102524	-0.00691424
Shigella_dysenteriae_Sd197_uid58213|argS	18.6017	0.0437134	-0.00190151	-0.029919	0.0129554	0.0128207	-0.00594032	-0.0273775	0.0101292	-0.0276133	0.00459303	0.012147	-0.0448096	0.0344263	0.00822764	-0.0235408	0.0130564	0.00785714	0.00513194	-0.00671501	0.00275888
Shigella_dysenteriae_Sd197_uid58213|prsA	15.9473	0.00371661	-0.00820751	-0.0287263	0.0267906	0.00425861	0.017499	-0.0356175	-0.00820751	-0.0512582	0.0146341	-0.00456833	0.00518777	0.00100658	-0.00402633	0.00456833	0.0514905	-0.00782036	0	0.0309717	-0.0116918
Shigella_dysenteriae_Sd197_uid58213|hemA	21.9897	0.0463188	-0.00591197	-0.0129011	-0.00825421	0.00379519	-0.0251384	-0.0444525	0.00582429	-0.0668854	0.000363236	0.0482602	-0.0369623	0.041484	0.00821664	0.0218067	0.0325033	0.00117738	0.00433378	0.00348205	-0.0170595
Shigella_dysenteriae_Sd197_uid58213|pheS	20.9313	0.050685	-0.0069419	-0.0536636	0.0111621	0.0163364	0.00716208	-0.0290703	0.0176391	-0.0803609	0.00858104	-0.00119878	-0.00812844	0.0237554	0.0119878	-0.00624465	0.0313945	0.0222202	-0.00788379	-0.00083792	-0.00659327
Shigella_dysenteriae_Sd197_uid58213|dcd	27.298	0.0693194	-0.0139092	-0.00093063	0.0146134	0.0197948	-0.0174556	-0.021329	0.00130791	-0.0711806	0.00616228	0.0515368	-0.0271643	-0.0236179	0.03305	-0.0151668	0.0689924	-0.0271643	0.0106897	-0.0200211	-0.037527
Shigella_dysenteriae_Sd197_uid58213|hisA	23.1618	0.0480989	0.00809552	-0.0341434	0.00306546	0.01885	0.00802778	-0.075434	0.00394614	-0.083665	-0.0125836	0.0190533	-0.0295199	0.0364637	-0.000609704	0.00340418	0.0406131	0.00768905	0.00394614	0.0268101	0.00789229
Shigella_dysenteriae_Sd197_uid58213|purM	19.0829	0.00662763	0.00882854	-0.0221918	0.00656119	0.0299489	-0.0112288	-0.039417	0.00309788	-0.0509779	-0.0140941	0.0182883	-0.0225572	0.0117271	0.0147917	0.0149911	0.0175906	0.00916075	0.0144928	0.00406129	0.000298991
Shigella_dysenteriae_Sd197_uid58213|pheA	15.1805	0.0350128	-0.00943469	-0.00322868	-0.0133787	-0.00301601	-0.0237414	-0.0288261	0.0276661	-0.0380481	0.0132627	0.0463035	-0.0481015	0.0383381	0.00527801	0.00506535	0.0205127	0.0222721	-0.00228134	-0.0199134	-0.0237414
Shigella_dysenteriae_Sd197_uid58213|ffh	19.5972	0.0260633	0.00220751	-0.0248565	0.0106696	0.00388521	0.0131126	-0.0425166	0.0110081	-0.0428403	0.0173657	-0.0117734	0.00419426	-0.00693157	0.00640177	-0.0158057	0.032936	-0.011376	0	0.0438411	-0.015585
Shigella_dysenteriae_Sd197_uid58213|alaS	17.6069	0.0601798	-0.00772468	-0.0289791	0.00575383	0.0206964	0.00858468	-0.0339138	0.00829801	-0.0360331	-0.00293323	0.00828265	-0.00941397	0.0108064	-0.00403383	0.0111135	0.0235477	-0.0137345	-0.00319942	-0.000849766	-0.0164476
Shigella_dysenteriae_Sd197_uid58213|hypF	25.1758	0.0679741	0.0125811	-0.0388638	-0.00510506	0.0177069	-0.00564981	-0.0729131	0.0178054	-0.0747549	0.00713878	0.0200208	-0.0417484	0.0458054	0.0342776	-0.0340752	0.0275746	0.00249546	0.018703	0.0226044	-0.0215772
Shigella_dysenteriae_Sd197_uid58213|hypB	21.6159	0.0399323	0.0166256	0.0133621	-0.0475062	0.00544951	-0.00812808	-0.0643473	-0.0136084	-0.0677956	0.00871305	0.0241071	-0.0197044	0.0176416	0.0407635	0.0269704	0.0314347	0.00951355	0.00689655	-0.0251847	0.00486453
Shigella_dysenteriae_Sd197_uid58213|sun	17.3392	0.0532379	0.00261839	-0.0250104	-0.00118147	0.0184165	-0.0269662	-0.0458457	0.0222164	-0.033097	-0.00641824	0.0208034	-0.0473704	0.0644618	0.0252658	-0.0105055	0.0184165	-0.0265351	0.02331	-0.0183048	-0.00751189
Shigella_dysenteriae_Sd197_uid58213|gldA	21.3219	0.0834571	0.0160796	-0.00181925	-0.0132895	0.0354876	0.00602066	-0.065803	0.00356508	-0.057392	0.0011095	0.0109971	-0.0176622	0.0174583	0.00766859	-0.0631108	0.00602066	0.00605329	0.00518037	0.0286593	-0.00868019
Shigella_dysenteriae_Sd197_uid58213|glnA	14.1652	-0.00270588	-0.00716628	-0.0106849	0.00780212	0.00725234	-0.0114976	0.00151548	0.0139358	-0.0228183	0.016068	0.000965703	-0.00433132	0.00114259	0.00375764	0.00364768	0.0154082	4.30264e-05	-0.00918852	-0.0102451	0.00709935
Shigella_dysenteriae_Sd197_uid58213|pyrE	20.5222	0.037711	0.00398427	-0.0127903	0.00839995	0.0290318	0.0455272	-0.00525314	0.0187793	-0.0679863	0.0133739	0.00527852	-0.0529121	0.0166476	0.0119528	-0.0118005	0.0347164	-0.0226113	0	-0.0571755	0.00512625
Shigella_dysenteriae_Sd197_uid58213|lysC	18.099	0.0428017	0.000452097	-0.00965584	-5.7107e-05	-0.0231093	0.00599147	-0.0513392	0.00286011	-0.0481507	-0.00782365	0.0633887	-0.011193	0.00722403	0.0099033	-0.00583443	0.0282632	0.00716692	0.00231759	-0.00929416	-0.00391183
Shigella_dysenteriae_Sd197_uid58213|nrdD	17.5661	0.0177185	0.0094849	-0.0126806	0.00174011	0.0137166	-0.00103969	-0.00454181	-0.00578214	-0.0280242	-0.0064169	-0.0138735	-0.000963082	0.0119473	0.0174595	-0.0174996	0.0229425	1.82402e-05	-0.00326135	0.00476069	-0.00570553
Shigella_sonnei_Ss046_uid58217|ileS	20.9018	0.0584292	0.00331996	-0.0358452	0.0118632	0.027733	-0.00563568	-0.0283289	0.00537586	-0.0345812	0.00237552	0.0105228	-0.0366061	0.0137067	0.00899275	-0.00695335	0.0180927	-0.00308488	-0.00159193	0.00248894	-0.0102733
Shigella_sonnei_Ss046_uid58217|speE	13.5051	0.0581349	0.00654762	-0.033631	-0.00198413	0.0122024	0.0196429	0.00168651	0.0236111	-0.0616071	0.0135913	-0.0270833	-0.0046627	0.0234127	-0.0117063	-0.00853175	0.0203373	-0.0123016	-0.000198413	-0.0160714	-0.00138889
Shigella_sonnei_Ss046_uid58217|modF	18.0537	0.0127021	-0.000944203	-0.0430393	0.00315602	0.00425263	0.0126166	-0.0327683	0.0119587	-0.0732129	-0.0155162	0.0123676	-0.0128843	0.0588974	0.0100703	0.0261106	0.0211516	0.0095647	0.0106427	-0.00821159	-0.00691424
Shigella_sonnei_Ss046_uid58217|argS	18.1643	0.0400553	-0.00191351	-0.031796	0.0145806	0.0127037	-0.00599729	-0.0274555	0.0118173	-0.0277122	0.00453006	0.0119701	-0.0431364	0.0326152	0.00990377	-0.0235918	0.0129605	0.00950029	0.00511695	-0.00684094	0.00268991
Shigella_sonnei_Ss046_uid58217|pheS	20.8297	0.0476269	-0.0069419	-0.0506055	0.00810398	0.0163364	0.00716208	-0.0290703	0.0176391	-0.0803609	0.00858104	0.00185933	-0.00812844	0.0237554	0.00892966	-0.00624465	0.0313945	0.0252783	-0.00788379	-0.00083792	-0.00659327
Shigella_sonnei_Ss046_uid58217|hemA	21.9101	0.0463188	-0.00591197	-0.0105088	-0.0106466	0.00379519	-0.0251384	-0.0420602	0.00821664	-0.0668854	0.000363236	0.0458679	-0.0369623	0.0390917	0.00821664	0.024199	0.0325033	0.00117738	0.00433378	0.00108971	-0.0170595
Shigella_sonnei_Ss046_uid58217|prsA	16.1583	0.00371661	-0.00820751	-0.0287263	0.0267906	0.00425861	0.017499	-0.0356175	-0.00820751	-0.0512582	0.0146341	-0.00456833	0.00518777	0.00100658	-0.00402633	0.00456833	0.0514905	-0.00782036	0	0.0309717	-0.0116918
Shigella_sonnei_Ss046_uid58217|hisA	23.1618	0.0480989	0.00809552	-0.0341434	0.00306546	0.01885	0.00802778	-0.075434	0.00394614	-0.083665	-0.0166653	0.0190533	-0.0295199	0.0364637	-0.000609704	0.00340418	0.0446947	0.00768905	0.00394614	0.0268101	0.00789229
Shigella_sonnei_Ss046_uid58217|dcd	27.1262	0.0693194	-0.0139092	-0.00093063	0.0146134	0.0249761	-0.0174556	-0.021329	0.00130791	-0.0711806	0.00616228	0.0515368	-0.0271643	-0.0236179	0.03305	-0.0203481	0.0689924	-0.0271643	0.0106897	-0.0200211	-0.037527
Shigella_sonnei_Ss046_uid58217|purM	19.1792	0.00952618	0.00882854	-0.0221918	0.00656119	0.0299489	-0.0112288	-0.039417	0.00309788	-0.0509779	-0.0140941	0.0182883	-0.0225572	0.0117271	0.0147917	0.0149911	0.0175906	0.0062622	0.0144928	0.00406129	0.000298991
Shigella_sonnei_Ss046_uid58217|pheA	14.9221	0.0350128	-0.0120254	-0.00322868	-0.0133787	-0.00560668	-0.0237414	-0.0288261	0.0276661	-0.0380481	0.0158534	0.0437128	-0.0481015	0.0409288	0.00527801	0.00506535	0.0256941	0.0222721	-0.00228134	-0.0225041	-0.0237414
Shigella_sonnei_Ss046_uid58217|ffh	20.1845	0.0260633	0.00220751	-0.0248565	0.0106696	0.00388521	0.0131126	-0.0425166	0.00880059	-0.0406328	0.0173657	-0.0139809	0.00419426	-0.00693157	0.00640177	-0.0158057	0.0351435	-0.011376	0	0.0438411	-0.015585
Shigella_sonnei_Ss046_uid58217|alaS	17.7589	0.0601798	-0.00772468	-0.0278375	0.00461228	0.0206964	0.00858468	-0.0339138	0.00829801	-0.0360331	-0.00293323	0.00828265	-0.00941397	0.0108064	-0.00403383	0.0111135	0.0235477	-0.0125929	-0.00319942	-0.00199132	-0.0164476
Shigella_sonnei_Ss046_uid58217|hypF	25.8416	0.0786407	0.0112477	-0.0401971	-0.00377173	0.0177069	-0.00831647	-0.0742464	0.0178054	-0.0747549	0.00713878	0.0213541	-0.0417484	0.0444721	0.0369442	-0.0354086	0.0289079	-0.00550454	0.018703	0.0212711	-0.0202438
Shigella_sonnei_Ss046_uid58217|hypB	22.0741	0.036484	0.0131773	0.0133621	-0.0475062	0.00889778	-0.00812808	-0.0643473	-0.0170567	-0.0677956	0.00871305	0.0241071	-0.0197044	0.0176416	0.0407635	0.0269704	0.0383313	0.00951355	0.00689655	-0.0251847	0.00486453
Shigella_sonnei_Ss046_uid58217|sun	17.8043	0.0532379	0.00261839	-0.0226794	-0.00118147	0.0184165	-0.0269662	-0.0481767	0.0245474	-0.035428	-0.00641824	0.0208034	-0.0473704	0.0644618	0.0252658	-0.0128365	0.0184165	-0.0242041	0.02331	-0.0159738	-0.0098429
Shigella_sonnei_Ss046_uid58217|pyrE	20.2107	0.037711	0.00398427	-0.00809542	0.00370511	0.0196422	0.0455272	-0.00525314	0.0187793	-0.0679863	0.0133739	0.00527852	-0.0482172	0.0166476	0.0119528	-0.0071057	0.0347164	-0.0226113	0	-0.0571755	0.00512625
Shigella_sonnei_Ss046_uid58217|glnA	13.2432	-0.00270588	-0.00716628	-0.0106849	0.00780212	0.00725234	-0.0114976	0.00151548	0.0139358	-0.0228183	0.016068	0.000965703	-0.00433132	0.00114259	0.00375764	0.00364768	0.0154082	4.30264e-05	-0.00918852	-0.0102451	0.00709935
Shigella_sonnei_Ss046_uid58217|gldA	21.5937	0.0834571	0.0188044	-0.00454405	-0.0132895	0.0354876	0.00329586	-0.065803	0.00356508	-0.057392	0.0011095	0.0109971	-0.0176622	0.0174583	0.00766859	-0.0631108	0.00874545	0.00605329	0.00518037	0.0286593	-0.00868019
Shigella_sonnei_Ss046_uid58217|lysC	18.4694	0.047256	0.000452097	-0.00965584	-0.00228428	-0.0186549	0.0037643	-0.0513392	0.00286011	-0.0481507	-0.00782365	0.0633887	-0.011193	0.00722403	0.0099033	-0.00583443	0.0282632	0.00271258	0.00231759	-0.00929416	-0.00391183
Shigella_sonnei_Ss046_uid58217|nrdD	17.7999	0.019123	0.0094849	-0.0126806	0.00174011	0.0137166	-0.00103969	-0.00454181	-0.00578214	-0.0280242	-0.00782139	-0.0138735	-0.000963082	0.0119473	0.0174595	-0.0174996	0.024347	-0.00138625	-0.00466584	0.00616518	-0.00570553
Staphylococcus_aureus_USA300_FPR3757_uid58555|ileS	-5.90582	-0.00449559	-0.00281635	-0.0332258	-0.00425947	-0.0073025	0.00135434	0.015404	0.00313747	-0.00781628	-0.0114921	0.0212067	0.0386621	0.00897795	-0.00160368	0.0132525	0.00225535	-0.00241024	-0.00658094	-0.0305039	0.00825639
Staphylococcus_aureus_USA300_FPR3757_uid58555|argS	-1.77333	0.0324028	-0.0070256	-0.0280417	0.0300545	-0.00052077	-0.000894574	0.0125528	0.0147988	-0.00885629	-0.00467735	-0.015965	-0.0162557	0.0165656	0.00053994	-0.0150289	-0.00261983	0.0154634	8.30676e-05	-0.0288724	0.00629716
Staphylococcus_aureus_USA300_FPR3757_uid58555|recQ	-2.6455	-0.0124344	0.0148323	-0.00438511	-0.0203865	-0.0161519	0.00818408	-0.0119925	0.00891128	-0.00693343	0.00856649	0.00625012	0.00515619	0.0304513	-0.00427227	-0.00655103	-0.0301598	0.0123811	0.00168634	-0.00451989	0.0213676
Staphylococcus_aureus_USA300_FPR3757_uid58555|oppF	0.968788	0.0330349	-0.000757681	6.31401e-05	0.00931948	-0.0168331	0.0185758	0.00342219	0.0161386	-0.0236523	-0.0116935	-0.026683	-0.0239806	0.021013	0.00747579	0.013272	0.0362298	-0.0115294	-0.00395257	-0.0397909	0.000328328
Staphylococcus_aureus_USA300_FPR3757_uid58555|oppF	0.968788	0.0330349	-0.000757681	6.31401e-05	0.00931948	-0.0168331	0.0185758	0.00342219	0.0161386	-0.0236523	-0.0116935	-0.026683	-0.0239806	0.021013	0.00747579	0.013272	0.0362298	-0.0115294	-0.00395257	-0.0397909	0.000328328
Staphylococcus_aureus_USA300_FPR3757_uid58555|purM	1.56851	0.0102381	-0.00561336	-0.00993649	-0.00742305	0.0192446	0.000645118	-0.0154912	0.00327586	-0.0446723	-0.00514419	-0.00718846	-0.00473366	0.0148545	0.0034518	0.0125756	0.00619984	0.0154409	0.00292398	-0.00671928	0.0180717
Staphylococcus_aureus_USA300_FPR3757_uid58555|trkA	-1.9438	0.013986	-0.00904977	-0.017791	0.0048951	-0.017791	8.22707e-05	0.000575895	0.0318387	-0.0314068	0.0227684	-0.013225	0.0274578	0.00913204	-0.013513	-0.0178939	0.0183258	0.00473056	0	-0.00870012	-0.00442205
Staphylococcus_aureus_USA300_FPR3757_uid58555|pheT	1.79843	0.0284838	-0.00402527	-0.0326083	0.0234883	0.00237816	-0.0156814	-0.0124729	-0.00430054	-0.0377527	-0.00291065	-0.00566787	-0.0145668	0.0250045	-0.0119314	0.0166787	0.0168141	0.00640343	0.00194495	0.0109928	0.00972924
Staphylococcus_aureus_USA300_FPR3757_uid58555|ileS	-5.90582	-0.00449559	-0.00281635	-0.0332258	-0.00425947	-0.0073025	0.00135434	0.015404	0.00313747	-0.00781628	-0.0114921	0.0212067	0.0386621	0.00897795	-0.00160368	0.0132525	0.00225535	-0.00241024	-0.00658094	-0.0305039	0.00825639
Staphylococcus_aureus_USA300_FPR3757_uid58555|pyrE	0.56926	0.0183997	-0.000479297	-0.0135535	0.00601784	0.00902676	0.0138197	0.0129943	0.0147783	-0.0504327	0.00444681	-0.00418054	-0.03182	0.00348822	0.0182665	0.0296898	0.00300892	-0.0106777	0.00985222	-0.0346958	0.00205033
Staphylococcus_aureus_USA300_FPR3757_uid58555|sun	0.602488	0.0129035	-0.00220438	-0.0120532	0.0164698	0.00145646	-0.0065659	0.00408597	0.033357	-0.00858133	0.000188947	-0.0199811	-0.0132735	0.0196583	-0.00318847	-0.00651866	-0.0100378	-0.0133207	0.0091954	-0.0121477	0.0105574
Staphylococcus_aureus_USA300_FPR3757_uid58555|ftsY	0.478021	0.0148825	0.00480769	0.0239103	0.0261752	-0.0126923	0.0136538	-0.0289744	0.00757479	-0.0562286	-0.0155983	-0.0245726	0.0291667	0.00141026	-0.0165064	-0.0196795	0.0166026	0.0065812	0.00240385	0.0278526	-0.000769231
Staphylococcus_aureus_USA300_FPR3757_uid58555|ffh	0.647359	-0.00290598	0	-0.0251282	0.0147741	-0.00527473	0.00637363	-0.027326	0.00654457	-0.0256654	0.0258852	-0.01221	0.0128205	0.0170696	-0.0003663	-0.00717949	0.0150916	-0.000561661	0	0.0214652	-0.0134066
Staphylococcus_aureus_USA300_FPR3757_uid58555|glnA	-4.32513	-0.0336323	-0.0044843	0	0.00896861	-0.0044843	-0.0044843	-0.0044843	-0.00224215	-0.00896861	0.00896861	0.0179372	0.0134529	0.00672646	0	-0.0156951	0.0179372	0.0112108	-0.00224215	-0.0134529	0.00896861
Staphylococcus_aureus_USA300_FPR3757_uid58555|recQ	-2.6455	-0.0124344	0.0148323	-0.00438511	-0.0203865	-0.0161519	0.00818408	-0.0119925	0.00891128	-0.00693343	0.00856649	0.00625012	0.00515619	0.0304513	-0.00427227	-0.00655103	-0.0301598	0.0123811	0.00168634	-0.00451989	0.0213676
Staphylococcus_aureus_USA300_FPR3757_uid58555|glyS	-0.573338	-0.00217112	-0.00488031	-0.0251052	0.0137115	-0.00572693	0.0172673	-0.0131847	0.00201684	-0.0175759	0.000203189	-0.00663376	0.00786418	0.0153935	0.00793567	0.0234006	-0.00433094	0.00828185	0.0146296	-0.0251654	-0.00593012
Staphylococcus_aureus_USA300_FPR3757_uid58555|alaS	-0.751187	0.0236501	-0.0134324	-0.0129973	0.00118762	0.000148453	0.0120093	-0.00994123	0.00259025	-0.0200514	0.00505764	-0.00884063	0.011134	0.0165141	0.00281549	0.00654729	0.00185822	-0.00460204	-0.00434097	-0.00313287	-0.0061736
Staphylococcus_aureus_USA300_FPR3757_uid58555|hemA	1.75092	0.027148	-0.00862472	-0.00941941	-0.00779497	-0.00132059	-0.00617053	0.00989856	0.0110789	-0.0429834	-0.00347092	0.00851954	-0.0256521	0.0263182	0.00215034	0.0235368	0.0143044	0.00722233	-0.00300346	-0.00818063	-0.0135565
Staphylococcus_aureus_USA300_FPR3757_uid58555|gatB	-2.28738	0.0247784	-0.0128201	0.00507687	0.0055886	0.00548087	0.010257	-0.019917	-0.00232073	-0.0138705	-0.00893278	0.0201638	0.00351027	0.0037796	-0.00482999	0.0121199	-0.00480305	-0.00698911	0.0020514	-0.0242083	0.00588486
Staphylococcus_aureus_USA300_FPR3757_uid58555|pheA	-0.998808	0.0199005	-0.0186002	-0.0329037	0.015943	0.000791497	0.015943	0.0164518	0.0115332	-0.036635	0.0114767	-0.0100633	-0.0327341	0.0381615	0.0042967	0.00469245	-0.00718001	0.0346563	-0.00367481	-0.0252714	-0.00678426
Staphylococcus_aureus_USA300_FPR3757_uid58555|moaA	-3.25795	-0.0198554	-0.012656	-0.0455536	0.0406714	0.020509	0.0222123	0.0107942	-0.0353733	-0.0148643	0.00626857	-0.00182214	0.00243613	0.0209745	-0.0265498	0.00456526	0.0276688	0.0125371	0.00251535	-0.016528	0.00204991
Staphylococcus_aureus_USA300_FPR3757_uid58555|fni	1.6672	0.00140442	-0.0169014	0.00130756	-0.007579	-0.0243836	0.000581137	-0.0494935	0.00893499	-0.0358449	0.0374914	-0.00724	-0.00743371	0.0232616	0.0118487	0.00698979	0.0232616	0.0121877	0.000193712	0.0267565	-0.00534323
Staphylococcus_aureus_USA300_FPR3757_uid58555|nrdD	-1.37311	-0.00227273	0.00974026	-0.0256494	0.0204545	-0.00649351	0.00649351	-0.00162338	-0.00324675	-0.00746753	-0.00844156	-0.00714286	0.00292208	0.00974026	0.0175325	-0.00909091	0.00194805	0.00974026	-0.00194805	-0.00974026	0.00454545
Staphylococcus_aureus_USA300_FPR3757_uid58555|hisA	5.12279	0.0272547	0.00439763	-0.0229102	0.0018619	-0.00569209	0.0258893	-0.00922084	0.0173423	-0.0646523	0.000620633	-0.010338	-0.0324503	0.021864	-0.0159769	0.0268823	0.0388339	0.0265099	0.00879526	-0.0608753	0.021864
Sulfobacillus_acidophilus_TPY_uid68841|prsA	19.3611	0.0107758	-0.0209059	-0.0156627	0.00495375	0.014249	0.0209171	-0.0351104	-0.00173659	-0.0383164	0.0116218	0.00873863	-0.0104418	0.00755864	0.00582204	-0.0142156	0.0551925	-0.00434149	0	0.0157073	-0.0148056
Sulfobacillus_acidophilus_TPY_uid68841|spoVB	30.7275	0.0862205	-0.00472813	0.00881024	-0.00543501	0.027704	-0.0470988	-0.0951478	0.0178218	-0.05112	0.0258643	0.0117829	-0.0377642	0.0309154	0.0187721	-0.056878	0.041645	0.0057393	0.0301477	0.0261077	-0.0333591
Sulfobacillus_acidophilus_TPY_uid68841|glnA	11.0806	-0.0147545	-0.0111599	-0.0420925	0.0142664	0.00305563	-0.00611635	-0.00163204	0.0229045	-0.0467801	-0.00430636	0.041579	-0.0176322	0.0115667	0.00514526	0.0210437	0.0230571	0.016356	0.00468767	-0.0172508	-0.0019371
Sulfobacillus_acidophilus_TPY_uid68841|hisA	30.1101	0.0604649	0.0043252	-0.0404388	0.0182678	0.0189711	0.0128877	-0.0821964	0.0213623	-0.111769	-0.00379774	0.0398938	-0.0496167	0.0215381	0.000791195	-0.0118328	0.0807722	0.0175645	0.0298368	-0.0231381	-0.00388565
Sulfobacillus_acidophilus_TPY_uid68841|purM	26.3175	0.0328444	-0.00549117	-0.0292435	0.00275414	0.0422786	-0.00166788	-0.0555104	0.000718471	-0.0912116	-0.0164735	0.0241286	-0.0365308	0.0154044	0.0398837	-0.00417397	0.0544498	0.00764658	0.0208955	0.001206	-0.00190737
Sulfobacillus_acidophilus_TPY_uid68841|gatB	18.1278	0.0410502	-0.00270541	-0.00846799	0.00556716	0.00314835	0.00515462	-0.0156593	-0.00280095	-0.0532745	-0.0221818	0.0375805	-0.0269239	0.0106914	0.00391265	0.00633145	0.0325214	-0.0125717	0.00388225	-0.00168926	-0.00356524
Sulfobacillus_acidophilus_TPY_uid68841|glnA	11.0806	-0.0147545	-0.0111599	-0.0420925	0.0142664	0.00305563	-0.00611635	-0.00163204	0.0229045	-0.0467801	-0.00430636	0.041579	-0.0176322	0.0115667	0.00514526	0.0210437	0.0230571	0.016356	0.00468767	-0.0172508	-0.0019371
Sulfobacillus_acidophilus_TPY_uid68841|ftsY	24.7292	0.0537664	0	-0.0291587	0.014732	0.0286262	0.0151438	-0.0323536	0.0179198	-0.106802	-0.0252751	-0.0216542	-0.014164	0.0108413	0.00500532	-0.0373589	0.0532055	0.00959176	0.0191693	0.0427902	-0.00402556
Sulfobacillus_acidophilus_TPY_uid68841|ffh	22.6347	0.0301502	0	-0.0168468	0.003003	-0.00342342	0.00477477	-0.0393694	0.00681682	-0.0657357	-0.00165165	0.00825826	-0.0130631	0.00963964	0.0117117	-0.0195495	0.0589189	0.00744745	0	0.0321622	-0.0132432
Sulfobacillus_acidophilus_TPY_uid68841|glnA	11.0806	-0.0147545	-0.0111599	-0.0420925	0.0142664	0.00305563	-0.00611635	-0.00163204	0.0229045	-0.0467801	-0.00430636	0.041579	-0.0176322	0.0115667	0.00514526	0.0210437	0.0230571	0.016356	0.00468767	-0.0172508	-0.0019371
Sulfobacillus_acidophilus_TPY_uid68841|tpiA	21.5525	0.0512258	-0.00967821	-0.0254025	0.0208403	0.00336633	0.0114943	-0.0407282	-0.00967821	-0.0291011	0.00564747	-0.00442938	-0.0367639	0.0670166	-0.00987753	-0.0329989	0.0400638	-0.0175404	0.0229885	-0.0274843	0.0210396
Sulfobacillus_acidophilus_TPY_uid68841|lysC	23.979	0.0461916	-0.0057818	-0.0385872	0.00999246	0.00276521	-0.00446204	-0.0486425	0.0120035	-0.0530417	-0.00603318	0.0162142	-0.0414781	0.053356	0.0377702	-0.021179	0.0323027	-0.00773002	0.00521619	0.00433635	0.00678733
Sulfobacillus_acidophilus_TPY_uid68841|proS	20.6791	0.049545	0.00404909	-0.026303	-0.012184	0.0110718	-0.0118853	-0.0276404	-0.00699972	-0.0426188	-0.00271165	-0.006917	-0.0199237	0.0482076	0.000919202	0.0010387	0.03686	0.000441217	0.0145004	0.0046098	-0.0140592
Sulfobacillus_acidophilus_TPY_uid68841|speE	18.234	0.0407738	-0.00734127	-0.0266865	-0.015873	0.00873016	-0.00119048	-0.0260913	0.00625	-0.0720238	-0.000297619	0.00416667	-0.0359127	0.0268849	0.0438492	-0.012004	0.030754	0.012004	0.0102183	0.0186508	-0.00486111
Sulfobacillus_acidophilus_TPY_uid68841|hypF	18.5956	0.0511473	-0.00169255	-0.0373712	0.00903132	0.0114671	0.00180297	-0.0403608	0.0212582	-0.0666752	0.00346915	0.000590003	-0.0562727	0.0212582	0.025998	-0.0293518	0.0425428	0.0156746	0.00759752	0.0346552	-0.0147682
Sulfobacillus_acidophilus_TPY_uid68841|hypF	18.5956	0.0511473	-0.00169255	-0.0373712	0.00903132	0.0114671	0.00180297	-0.0403608	0.0212582	-0.0666752	0.00346915	0.000590003	-0.0562727	0.0212582	0.025998	-0.0293518	0.0425428	0.0156746	0.00759752	0.0346552	-0.0147682
Sulfobacillus_acidophilus_TPY_uid68841|hypB	16.0135	0.0112966	-0.00916149	0.011413	-0.0331134	-0.0147904	0.00341615	-0.0595497	-0.0315994	-0.0856366	-0.000582298	0.0328028	-0.0322981	0.00399845	0.0256211	0.0473602	0.0692158	0.0204581	0.0130435	0.0196429	0.00846273
Sulfobacillus_acidophilus_TPY_uid68841|dcd	24.8086	0.0423024	-0.0242718	-0.00120203	-0.0107258	0.0368932	-0.0294961	-0.025104	-0.00989367	-0.0780398	0.0235321	0.050994	-0.0392048	0.00411466	0.0375405	-0.0301433	0.0662043	-0.0153953	0.00943135	0.0126214	-0.0201572
Sulfobacillus_acidophilus_TPY_uid68841|lysC	23.979	0.0461916	-0.0057818	-0.0385872	0.00999246	0.00276521	-0.00446204	-0.0486425	0.0120035	-0.0530417	-0.00603318	0.0162142	-0.0414781	0.053356	0.0377702	-0.021179	0.0323027	-0.00773002	0.00521619	0.00433635	0.00678733
Sulfobacillus_acidophilus_TPY_uid68841|alaS	20.7539	0.0388725	-0.00539968	-0.0217684	-0.000802238	0.0291428	0.0145071	-0.0463138	0.00611964	-0.0644567	-0.00741042	0.0190017	-0.0241494	0.0236043	0.0121364	-0.00812009	0.0479183	-0.00549225	0.00142963	0.00524026	-0.0140597
Sulfobacillus_acidophilus_TPY_uid68841|pyrE	29.3683	0.0344418	0.0050658	-0.0344701	-0.00659403	0.029376	0.0206028	-0.0285553	0.0471204	-0.108618	0.0050658	-0.00846187	-0.0549031	0.0151974	0.0623178	-0.0174048	0.0673836	-0.0282157	0.026178	-0.00880147	-0.0167256
Sulfobacillus_acidophilus_TPY_uid68841|ileS	22.4786	0.0561631	0.00381309	-0.0393089	0.00335083	0.0204629	-0.00564507	-0.0344179	0.0128644	-0.0764854	-0.00338704	0.0352615	-0.0347651	0.0236092	0.0225867	-0.0185137	0.0417394	-0.000328053	0.000319532	-0.000411132	-0.00690829
Sulfobacillus_acidophilus_TPY_uid68841|hemA	23.3382	0.0420862	-0.0088155	0.00832326	-0.0253278	0.0333826	-0.0162438	-0.0546046	0.00993422	-0.0800331	-0.00646619	0.0304403	-0.0338748	0.0265472	0.00779747	-0.018168	0.0483398	0.00512373	0.00758491	0.0340202	-0.0100461
Sulfobacillus_acidophilus_TPY_uid68841|argS	24.1275	0.0410403	-0.00883392	-0.0355617	0.0117563	0.0209054	0.00617579	-0.0418075	0.00568554	-0.0595804	-0.00657689	0.0198039	-0.0597205	0.0200649	0.0274823	-0.0151657	0.0512909	-0.000961385	0.0126826	0.0105848	0.000735364
Sulfobacillus_acidophilus_TPY_uid68841|speE	18.234	0.0407738	-0.00734127	-0.0266865	-0.015873	0.00873016	-0.00119048	-0.0260913	0.00625	-0.0720238	-0.000297619	0.00416667	-0.0359127	0.0268849	0.0438492	-0.012004	0.030754	0.012004	0.0102183	0.0186508	-0.00486111
Synechococcus_PCC_7002_uid59137|hypB	7.88105	0.0172848	0.00412088	-0.00389194	-0.0330815	-0.00835623	-0.0100733	-0.0464744	0.0396062	-0.0574634	-0.00400641	0.0156822	-0.0018315	0.0232372	0.0114469	0.0297619	0.0232372	-0.0051511	0.003663	-0.00709707	0.00938645
Synechococcus_PCC_7002_uid59137|hypF	8.89379	0.027186	-0.000963352	-0.0354267	-0.0056398	0.00104548	0.0124962	-0.0416449	0.00820474	-0.0419563	-0.00234935	0.0293506	-0.0250061	0.0491018	0.0230058	-0.0120137	0.0137487	0.00598886	0.00398003	-0.00317923	-0.00592898
Synechococcus_PCC_7002_uid59137|purM	21.653	0.025141	0.00613399	-0.0302414	-0.0189818	0.0459377	0.00660454	-0.038703	0.000403331	-0.0620961	-0.00505844	0.00474754	-0.0309809	0.0618525	0.0211329	-0.00192422	-0.00252922	0.0126713	0.0175953	-0.00937744	-0.00232756
Synechococcus_PCC_7002_uid59137|argS	12.186	0.0165081	-0.000286914	-0.0413367	0.0326387	0.00505874	0.00215638	-0.0091903	-0.00387787	-0.0164296	-0.0181269	0.0312615	-0.0469693	0.0389146	0.0112198	0.00340672	0.0105886	0.00375102	-0.000114765	-0.014548	-0.00462384
Synechococcus_PCC_7002_uid59137|trkA	13.9487	0.0165613	0.00511453	-0.0349813	-0.0259316	-0.00381988	0.0130619	-0.0332124	0.00680656	-0.0621691	0.00794739	0.0313153	-0.0180611	0.0532732	0.00684501	-0.00952405	0.0419802	0.00743466	0.00849858	-0.020817	0.00967787
Synechococcus_PCC_7002_uid59137|fni	18.4738	0.0381929	0.0123384	-0.0117289	-0.00944733	0.000181204	0.00420888	-0.0626472	0.0036735	-0.0436784	-0.0023886	0.0439338	-0.02667	0.0446092	0.0184005	-0.0410757	0.0358372	-0.00424183	-0.00249568	0.0109134	-0.00791533
Synechococcus_PCC_7002_uid59137|pyrE	19.9915	0.0711439	-0.0003549	-0.0518428	0.00726181	0.0108927	0.00939121	-0.0150696	0.00505051	-0.0839203	0.0046956	0.0185094	-0.0558286	0.0544909	0.0191373	0.00655201	0.0137319	0.0108927	0	-0.0327054	0.00797161
Synechococcus_PCC_7002_uid59137|lysC	19.032	0.0749703	0.00256127	-0.0296598	0.00335371	-0.0175893	-0.0164572	-0.0131601	0.00325466	-0.0378814	0.00581593	-0.00241977	-0.0214807	0.0434709	0.0178865	-0.00476878	0.00506594	-0.00118866	0.00117451	-0.00509424	-0.00785363
Synechococcus_PCC_7002_uid59137|hemA	20.6326	0.0231722	-0.00603018	0.0139945	-0.0304158	0.00779181	-0.0254142	-0.0265353	0.0101755	-0.05583	-0.00238374	0.0508777	-0.0351217	0.0452048	0.00311672	0.00176163	0.0266153	0.000468124	-0.00052972	0.0187311	-0.0196489
Synechococcus_PCC_7002_uid59137|ffh	17.55	0.0192376	0	-0.015537	0.0155742	0.0246025	0.00719665	-0.0343654	-0.00235239	-0.0393212	0.00785681	-0.0065086	-0.00404463	-0.000641562	0.00223152	-0.00940028	0.0214505	-0.00717806	0.00209205	0.0307392	-0.0116318
Synechococcus_PCC_7002_uid59137|glnA	11.1805	-0.0119739	-0.000895913	-0.0303615	0.0135856	0.00237488	-0.00768399	-0.00531385	0.00307644	-0.0211369	0.000962277	0.0215304	-0.00467392	0.0157614	0.0180699	-0.00319969	0.00865101	0.0123674	0.0034604	-0.0319637	0.0173636
Synechococcus_PCC_7002_uid59137|alaS	15.8754	0.0486575	-0.00545198	-0.00739629	-0.00915013	0.0114703	0.0142391	-0.0145829	0.00484862	-0.0315333	-0.0120826	0.00248247	-0.00945692	0.0233036	0.00619979	-0.000354091	0.0143541	-0.00580608	-0.00663058	-0.00549928	-0.0176113
Synechococcus_PCC_7002_uid59137|hypB	7.88105	0.0172848	0.00412088	-0.00389194	-0.0330815	-0.00835623	-0.0100733	-0.0464744	0.0396062	-0.0574634	-0.00400641	0.0156822	-0.0018315	0.0232372	0.0114469	0.0297619	0.0232372	-0.0051511	0.003663	-0.00709707	0.00938645
Synechococcus_PCC_7002_uid59137|ileS	14.2743	0.0517293	-0.000182778	-0.0301815	0.00366762	0.0090425	-0.00233996	-0.029602	0.000530258	-0.0393847	-0.013865	0.0260449	-0.0153805	0.0273866	0.0109456	-0.00825415	0.0105891	0.0132675	-0.00119007	-0.0120202	-0.000802417
Synechococcus_PCC_7002_uid59137|hisA	20.8498	0.0984018	0.00366312	-0.0444113	0.0119781	0.0139393	0.00341999	-0.042207	-0.000486255	-0.0971376	-0.00902814	0.0068562	-0.0307475	0.03809	-0.00218815	-0.0180563	0.0305206	0.0295481	-0.000486255	0.00539743	0.00293374
Synechococcus_PCC_7002_uid59137|speE	15.4633	0.0570291	-0.00473157	-0.00928116	-0.010919	0.0189035	0.00172884	-0.00377616	0.00366242	-0.0323476	0.0115787	-0.00764331	-0.0269336	0.0060737	0.00771156	-0.0125569	0.0108053	-0.000978162	0.0119654	-0.00213831	-0.0181529
Synechococcus_PCC_7002_uid59137|ndbA	15.5466	0.00515444	-0.0091383	-0.0249262	0.00213457	-0.00336416	0.0209424	-0.0476392	0.0172142	-0.0229294	-0.01446	0.0480523	0.00745623	0.0187684	0.000491836	0.000668896	0.0165945	-0.0179618	0.0106925	-0.0109483	0.00319693
Synechococcus_PCC_7002_uid59137|pheA	19.7546	0.0598548	-0.00526477	-0.0338377	-0.0042936	-0.0042936	-0.0248415	-0.00705377	0.0333265	-0.0512676	-0.00403803	0.0443161	-0.062155	0.0395625	0.0280617	0.005367	0.0115518	0.0140564	0.00623594	-0.0101717	-0.0351155
Synechococcus_PCC_7002_uid59137|rfaG	4.87151	0.0219092	-0.000156495	-0.020266	0.00492958	-0.0482786	-0.00641628	-0.031964	-0.00586854	-0.023748	0.0249218	0.0150235	-0.0431142	0.0387715	0.0300861	0.00446009	0.0276604	0.0134977	0.00829421	-0.00907668	-0.000665102
Synechococcus_PCC_7002_uid59137|rfaG	4.87151	0.0219092	-0.000156495	-0.020266	0.00492958	-0.0482786	-0.00641628	-0.031964	-0.00586854	-0.023748	0.0249218	0.0150235	-0.0431142	0.0387715	0.0300861	0.00446009	0.0276604	0.0134977	0.00829421	-0.00907668	-0.000665102
Synechococcus_PCC_7002_uid59137|gatB	13.6159	0.0442818	-0.0028286	-0.00533909	-0.00313381	0.000434177	0.00690384	-0.0142591	-0.000928537	-0.0234842	-0.0243827	0.0203633	-0.023179	0.0122558	0.00942723	0.0199721	0.00147878	-0.000885549	0.00178399	-0.0186395	0.000159055
Thermococcus_gammatolerans_EJ3_uid59389|nrdD	21.1166	0.0170789	-0.00164179	0.0115304	-0.0169463	-0.00172599	0.00641984	-0.0211749	-0.0113978	-0.0319076	0.00773959	-0.00403292	-0.0263487	-0.0113873	0.03043	-0.00755436	0.0261908	0.0128818	0.0126229	0.00476752	0.004456
Thermococcus_gammatolerans_EJ3_uid59389|trxB	18.2691	-0.00341065	0.000699795	0.00263612	-0.00250703	0.0311443	0.0276861	-0.0282568	0.0104901	0.00712024	-0.0181811	0.0192953	-0.00765018	-0.00534698	-0.00695039	-0.0114345	0.0216801	-0.0160817	0.00148112	-0.0260351	0.00362127
Thermococcus_gammatolerans_EJ3_uid59389|hypF	23.8912	0.0387996	-0.00650357	0.00118109	-0.00654893	0.0206464	0.00513431	-0.0415936	0.00775018	-0.0415701	0.00775018	-0.00401034	-0.045441	-0.00390785	0.0193864	-0.0324725	0.0401134	-0.00523511	0.00129366	0.0323246	0.012903
Thermococcus_gammatolerans_EJ3_uid59389|trkA	16.188	0.0151822	-0.00466381	0.00174645	-0.0111336	-0.0201834	0.0257601	-0.0389775	0.00424704	-0.0115504	0.00849409	0.00599349	0.0119076	0.00410812	0.0167103	-0.0282607	0.0253433	0.00313567	0.00438596	-0.00702548	-0.0052195
Thermococcus_gammatolerans_EJ3_uid59389|alaS	20.8744	0.0197791	-0.00909754	0.00863216	-0.0113532	0.0082331	0.00582395	-0.0193812	0.00728024	-0.00534875	0.00266701	0.0069573	-0.0240841	-0.00943276	0.0190448	-0.0273442	0.0264797	-0.00905947	0.00519281	0.0102432	-0.0052321
Thermococcus_gammatolerans_EJ3_uid59389|tpiA	18.3292	0.0416134	-0.0129163	0.00179037	-0.0050642	-0.0101284	0.00884956	-0.00263441	0.000358075	0.020487	0.00478285	-0.0155507	-0.0370351	0.00306921	0.00992378	-0.0264719	-0.00235306	0.00992378	0	0.00386209	0.00749399
Thermococcus_gammatolerans_EJ3_uid59389|glnA	14.8397	-0.00672646	-0.0134529	0.0246637	-0.0179372	0.0179372	-0.0224215	0.0246637	0.00224215	-0.0112108	0.00224215	0.0224215	-0.0112108	-0.0134529	0.00672646	-0.0201794	0.0201794	-0.00672646	0	-0.0313901	0.0336323
Thermococcus_gammatolerans_EJ3_uid59389|dcd	17.1997	0.0345681	-0.0242718	0.0324346	-0.0121514	0.0133263	-0.0166966	0.00847196	-0.013048	-0.0206543	0.017284	0.0354647	-0.0264053	-0.0148723	0.0345681	-0.0315689	0.0585307	-0.0455136	0.0142539	-0.0173149	-0.0264053
Thermococcus_gammatolerans_EJ3_uid59389|speE	16.839	0.0224647	-0.0142857	0.0235007	-0.00658216	0.014371	0.0083374	-0.0130912	-0.00793515	-0.0348367	0.00976353	0.00580205	-0.0292053	-0.011665	-0.0122989	-0.0230132	0.0538152	-0.0269015	-0.000316919	0.0238176	0.0182594
Thermococcus_gammatolerans_EJ3_uid59389|ileS	22.6721	0.0166333	-0.00691498	0.021458	-0.00566844	0.00781315	0.000714905	-0.0145177	-0.00345296	-0.00955687	-0.00069676	0.00723252	-0.0270993	-0.000580634	0.00830669	-0.0336078	0.0328421	-0.0100395	0.00578275	0.013654	-0.00230258
Thermococcus_gammatolerans_EJ3_uid59389|purM	20.7264	0.0121991	-0.00846731	0.0158365	-0.0269804	0.0336719	0.00740353	-0.0164542	-0.00222192	-0.0432716	-0.00743785	0.0334145	-0.0125251	-0.00846731	0.0161282	-0.0220219	0.0277182	0.00479557	0.00598802	-0.0224422	0.0131342
Thermococcus_gammatolerans_EJ3_uid59389|argS	21.7368	0.00589112	-0.00727142	0.010159	0.00073432	0.0186672	0.00488074	-0.0193132	0.00617822	-0.00199315	-0.00367712	0.013019	-0.0402385	0.00638251	0.0082818	-0.023316	0.0247847	-0.0111528	0.0120914	-0.0045053	0.000397527
Thermococcus_gammatolerans_EJ3_uid59389|proS	23.6983	0.0351967	0.00175983	0.00507246	-0.000724638	-0.00279503	-0.000207039	-0.0122153	0.00714286	-0.0187371	0.00517598	-0.0315735	-0.0119048	0.00341615	0.00621118	-0.0122153	0.0331263	-0.0153209	0.00569358	0.0114907	-0.00859213
Thermococcus_gammatolerans_EJ3_uid59389|hmgA	18.2889	-0.00440694	-0.0097677	0.0127379	0.000156959	0.0127499	-0.00231817	-0.0241476	0.00744953	-0.00206462	0.00748575	-0.00205255	-0.00714769	-0.00480537	0.01735	-0.0194509	0.0124843	-0.00461219	1.20738e-05	0.0102265	0.000120738
[truncated: 31 more rows]
